# Supplementary material
Source: PubMed Central journal article supplement (PMC2895411)

# Supporting Information

## **Structure-Activity Relationships in Human Toll-like Receptor 7-Active Imidazoquinoline Analogues**

**Nikunj M. Shukla, Subbalakshmi S. Malladi, Cole A. Mutz,  
Rajalakshmi Balakrishna, and Sunil A. David\***

Department of Medicinal Chemistry,  
University of Kansas.

# <sup>1</sup>H Spectrum

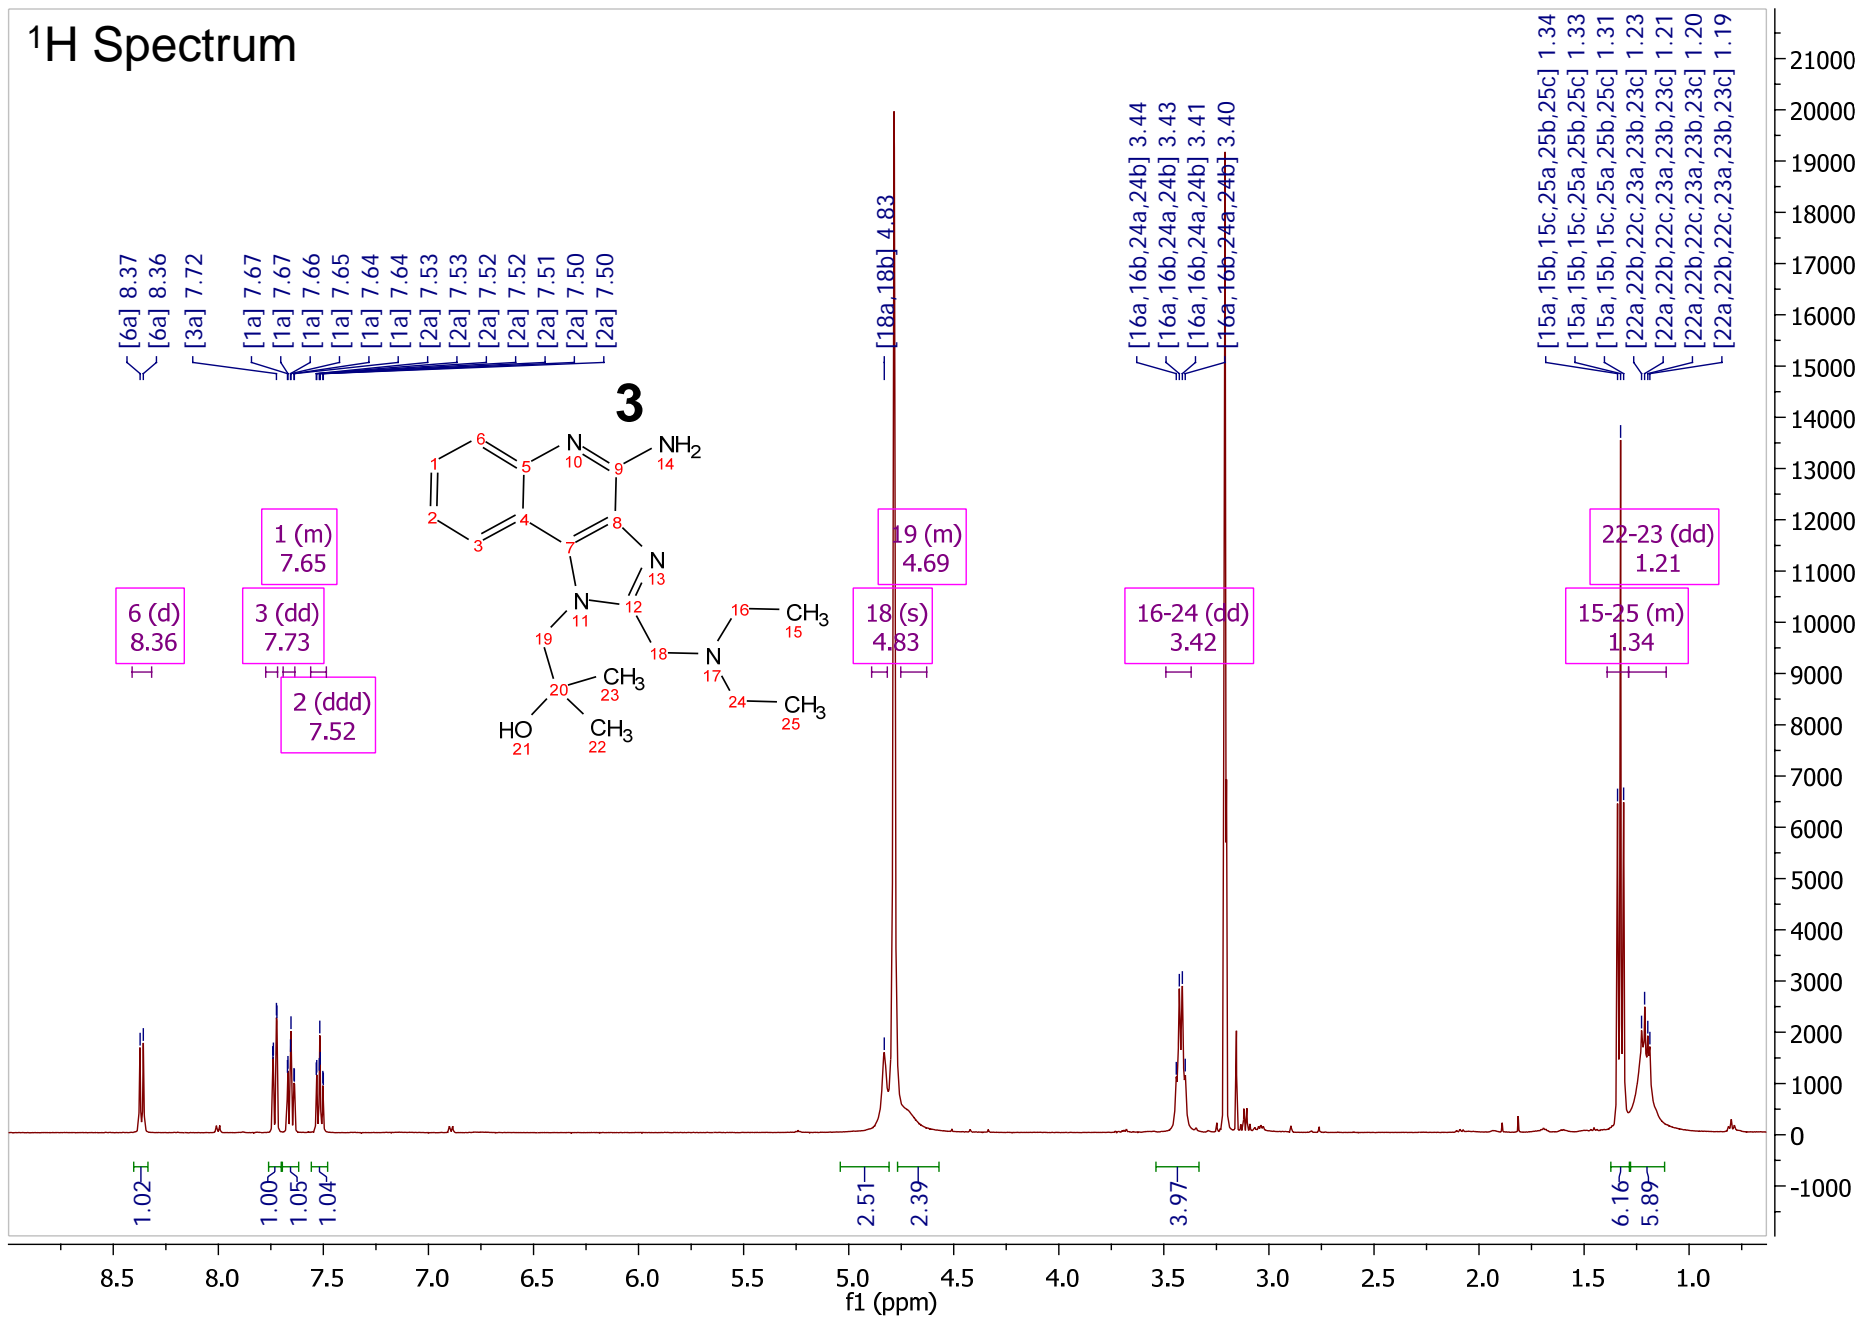

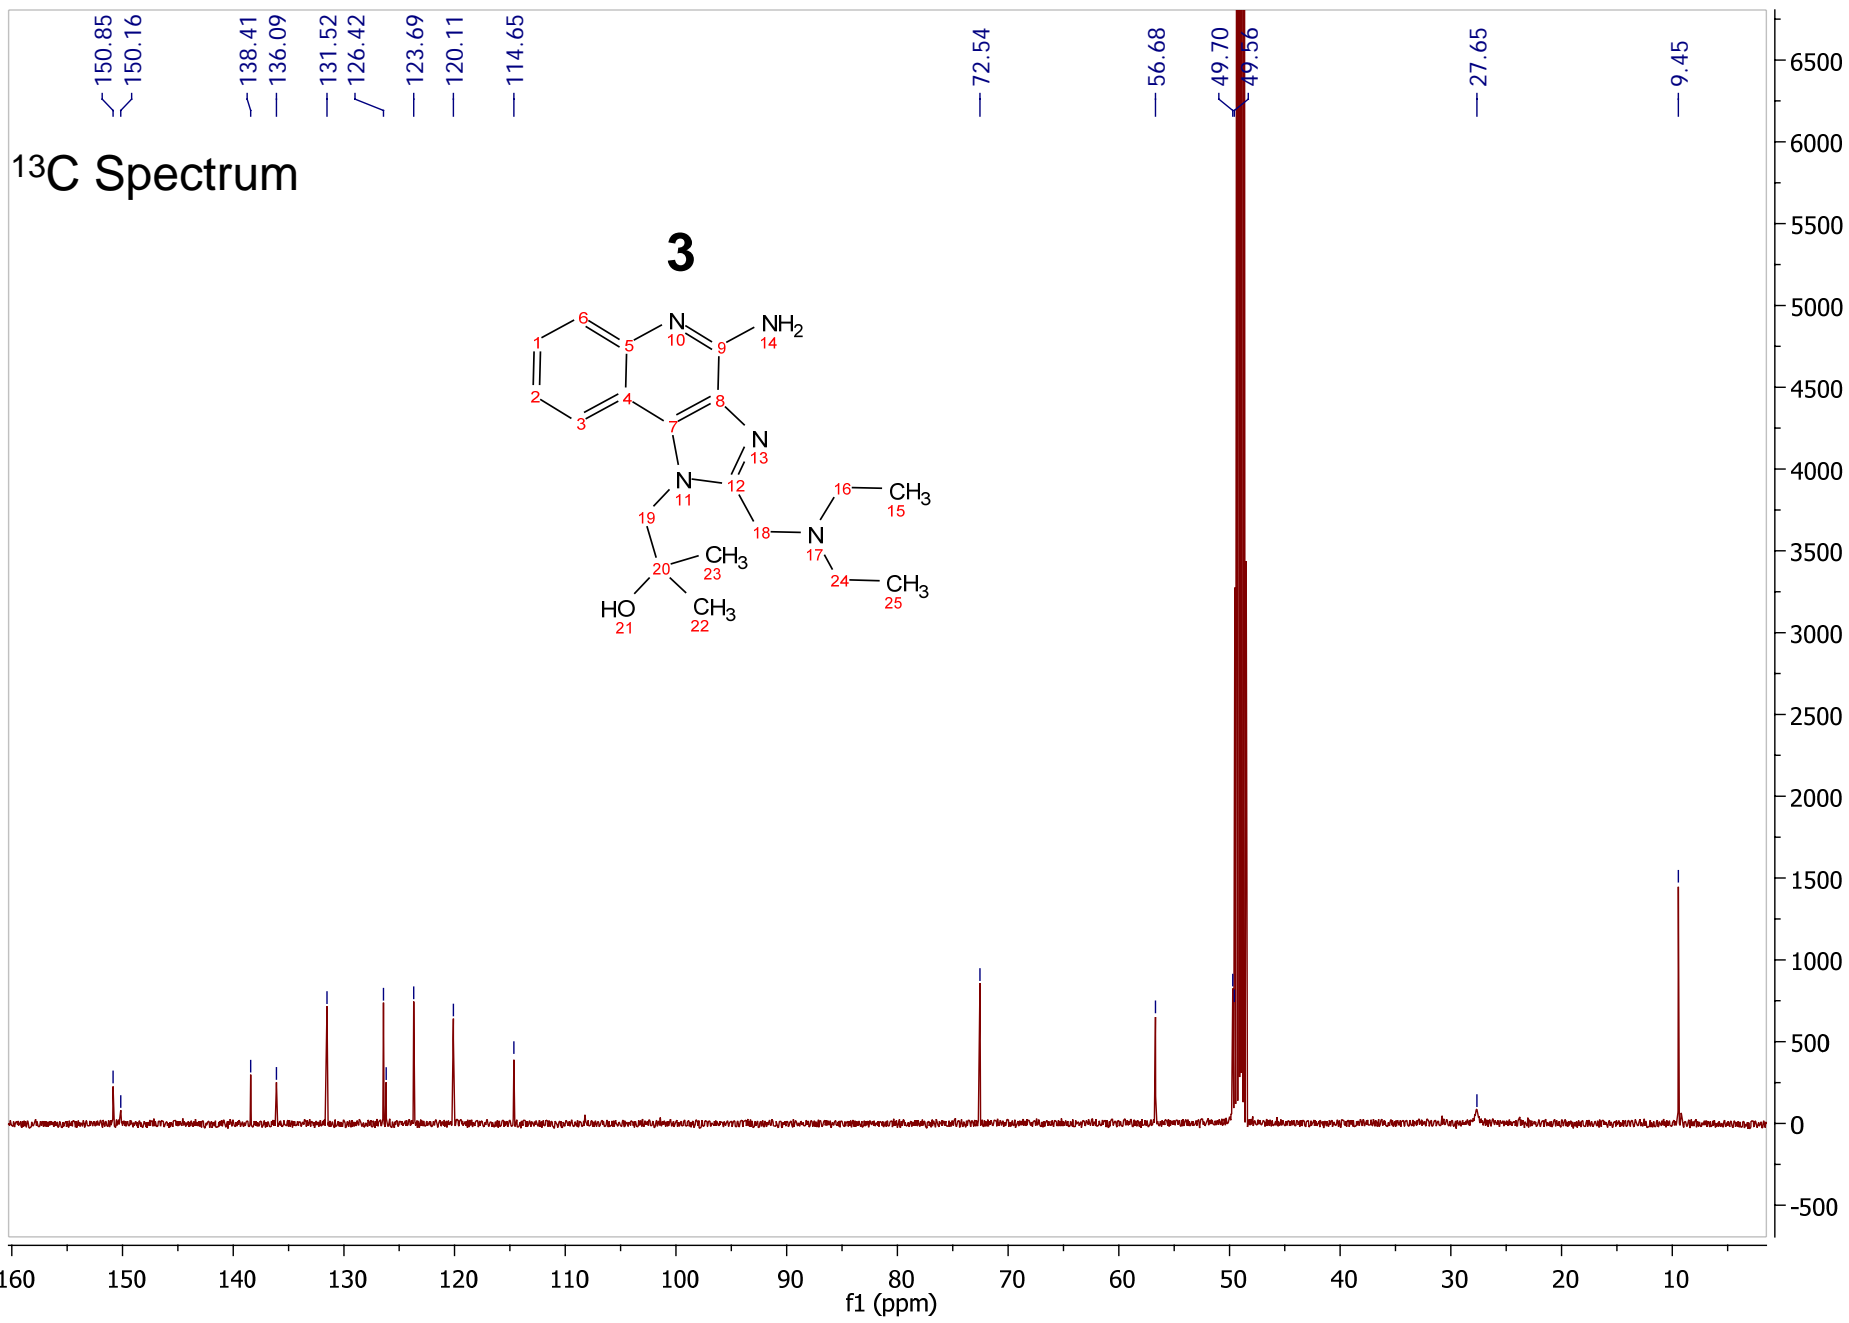

|              |                   |                                          |
|--------------|-------------------|------------------------------------------|
| TOF Spectrum | TOF               | Profile Spectrum at 9932.92 min (scan 1) |
| Baseline = 0 | Abundance Min = 0 | Abundance Max = 976201                   |

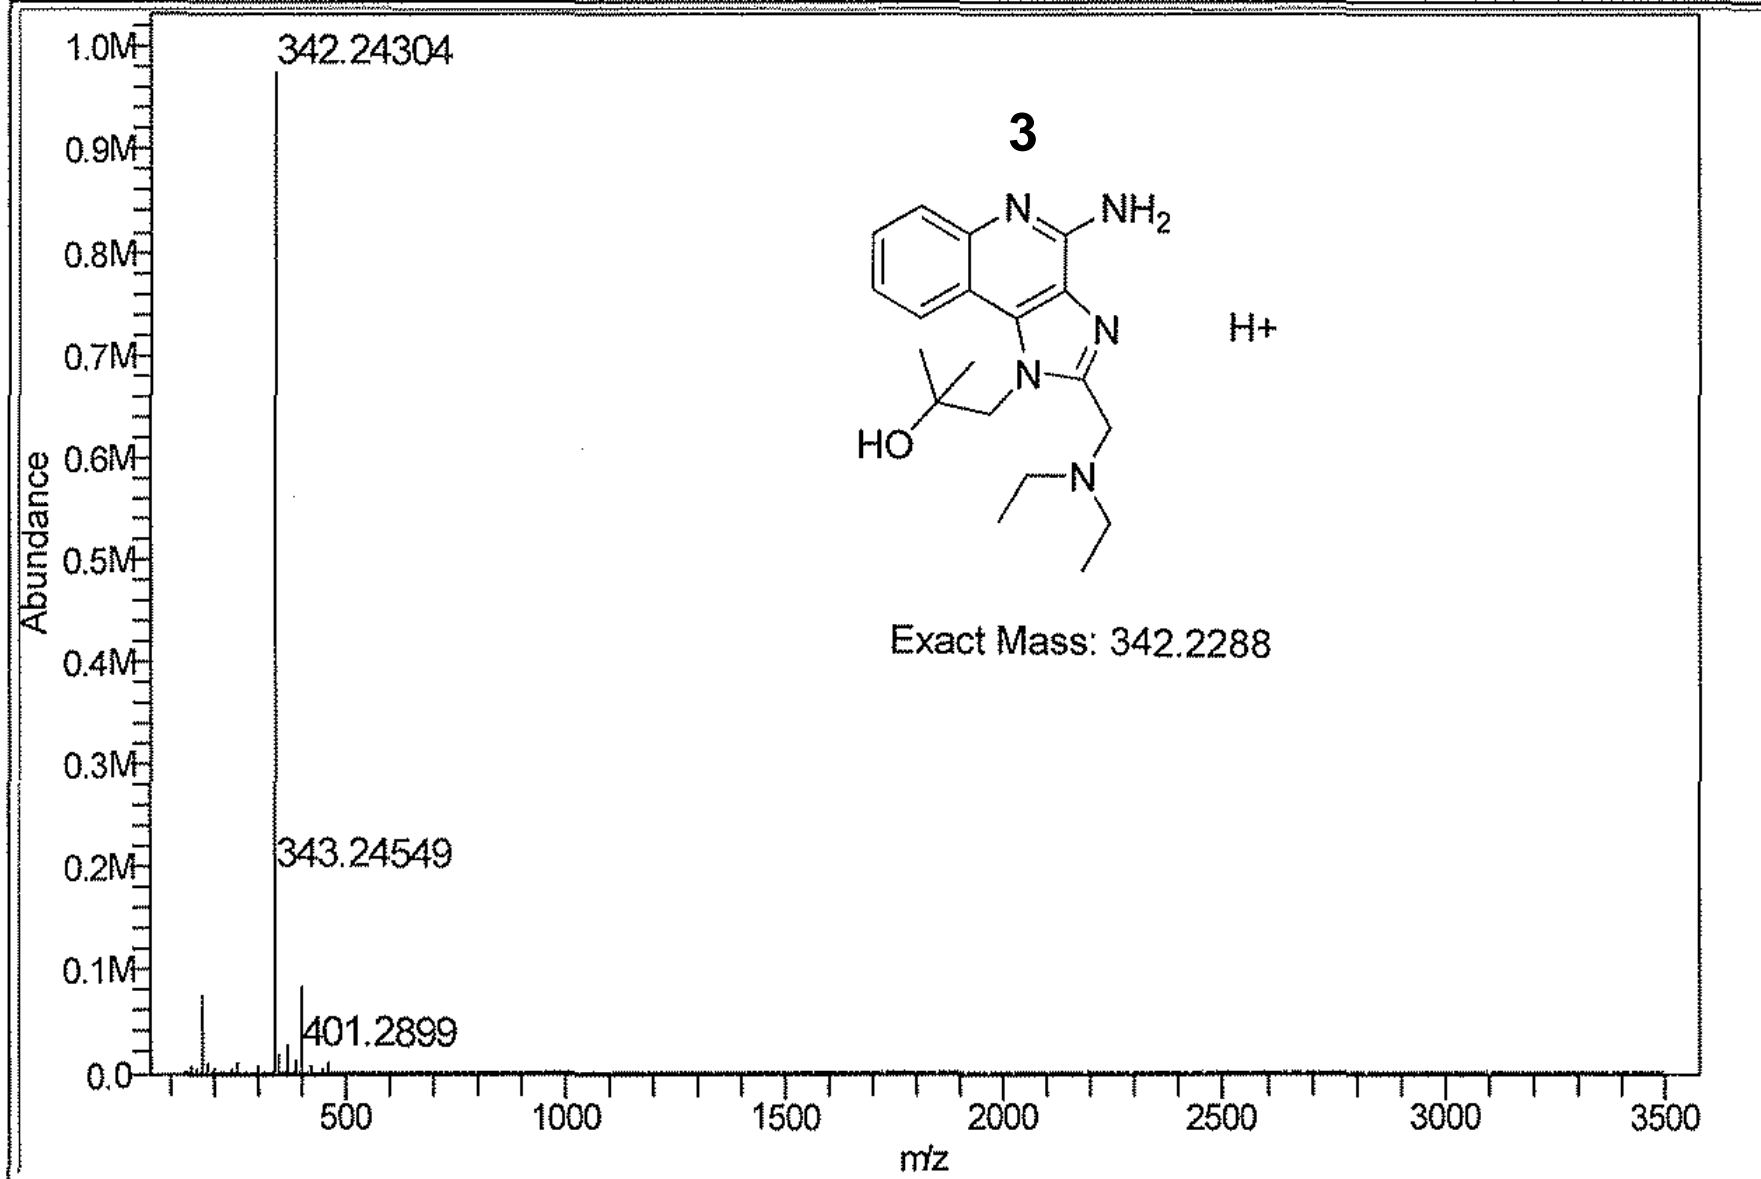



# <sup>13</sup>C Spectrum

4

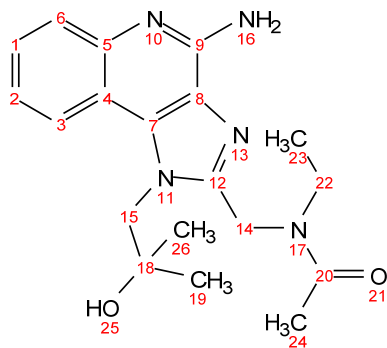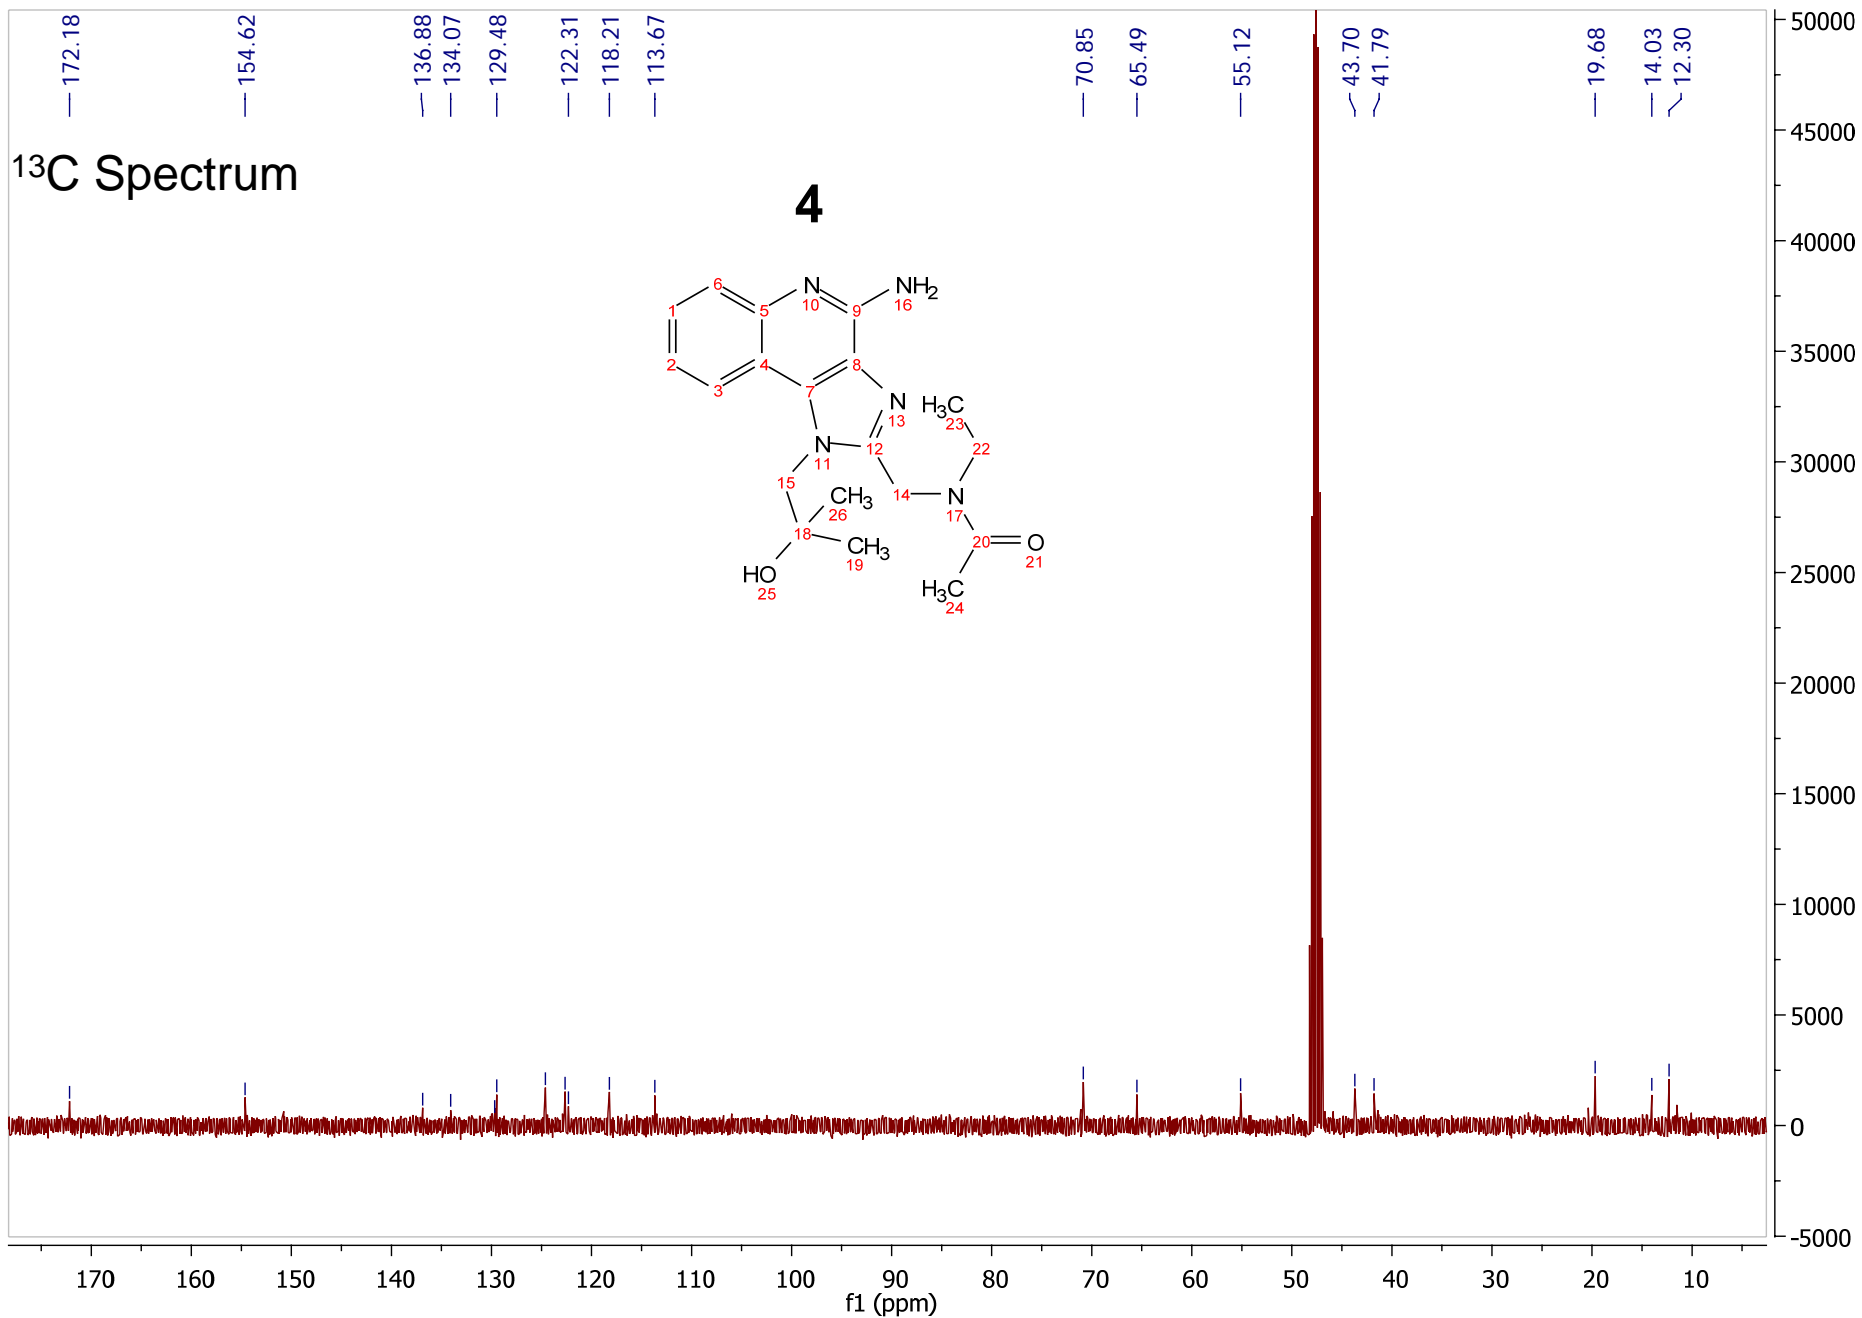

|                                    |                   |                                            |
|------------------------------------|-------------------|--------------------------------------------|
| TOF Spectrum                       | TOF               | Profile Spectrum at 198.32 min<br>(scan 1) |
| Baseline =<br>4.75398145947231E-02 | Abundance Min = 0 | Abundance Max = 388303                     |

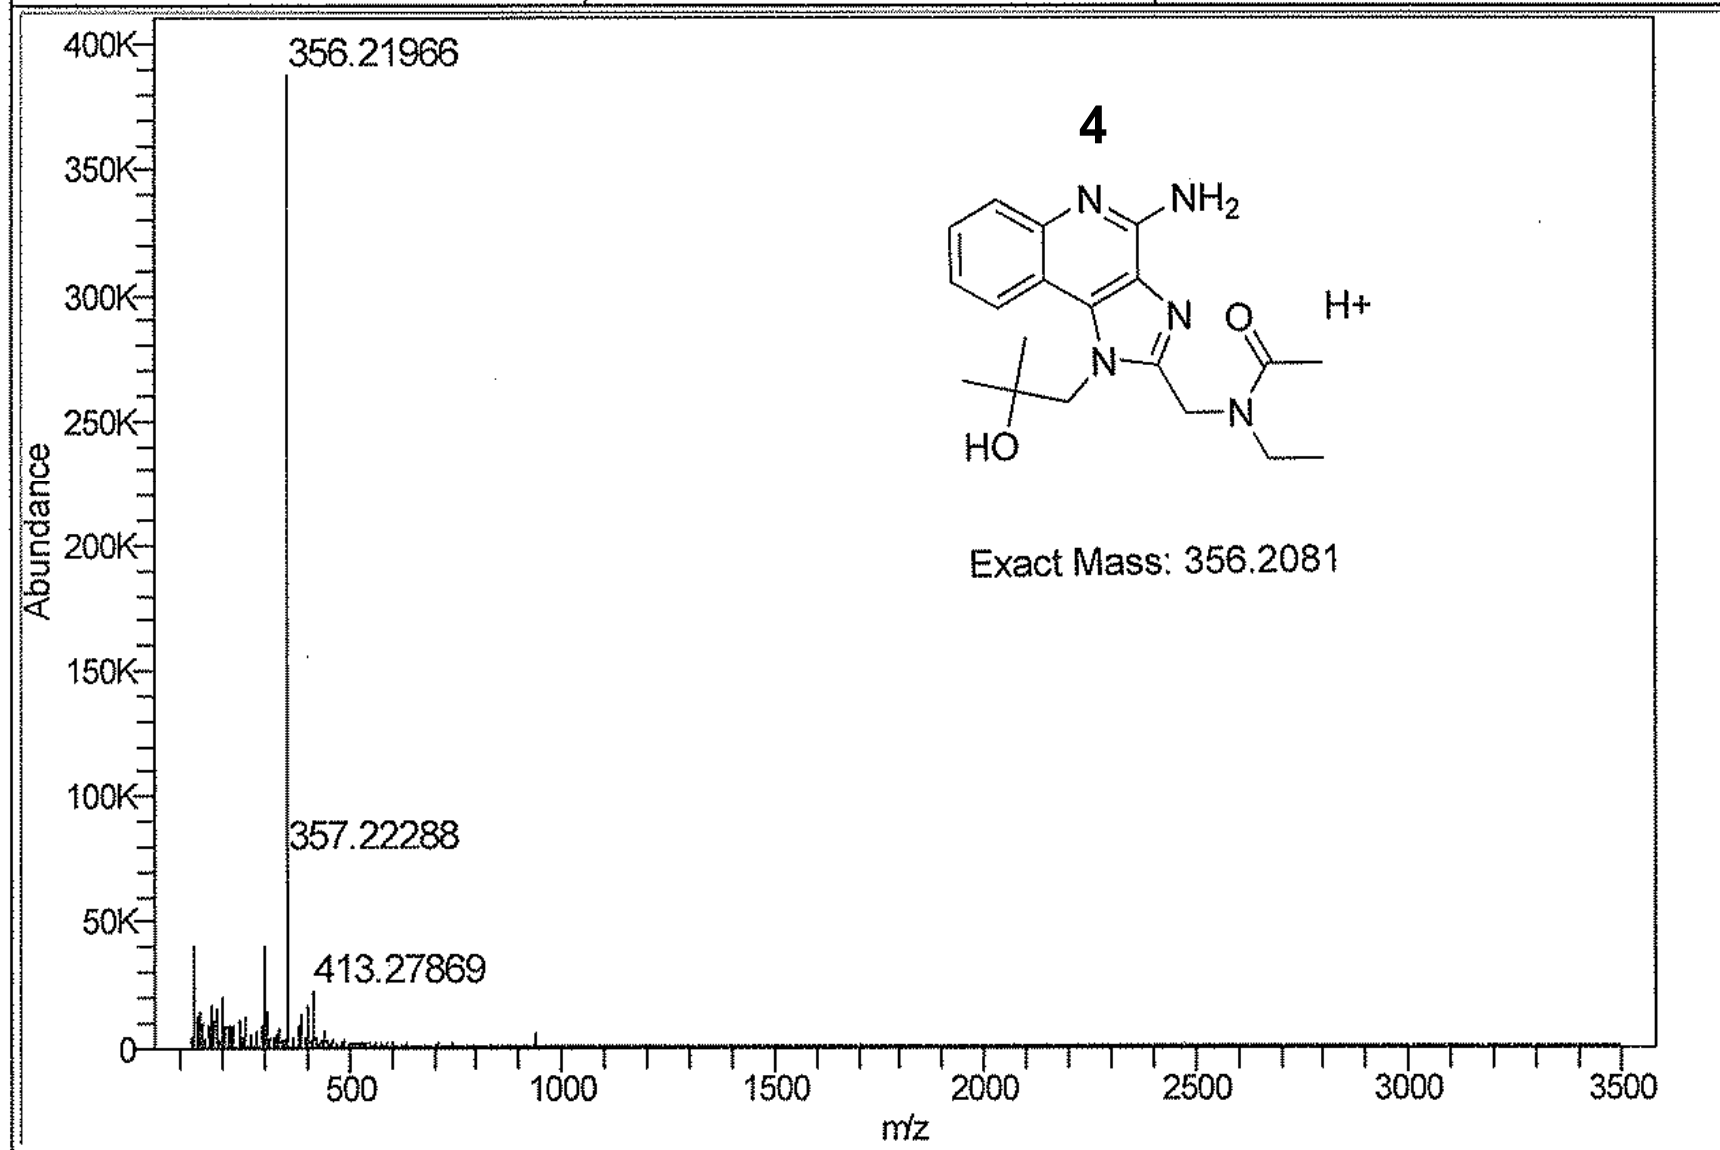

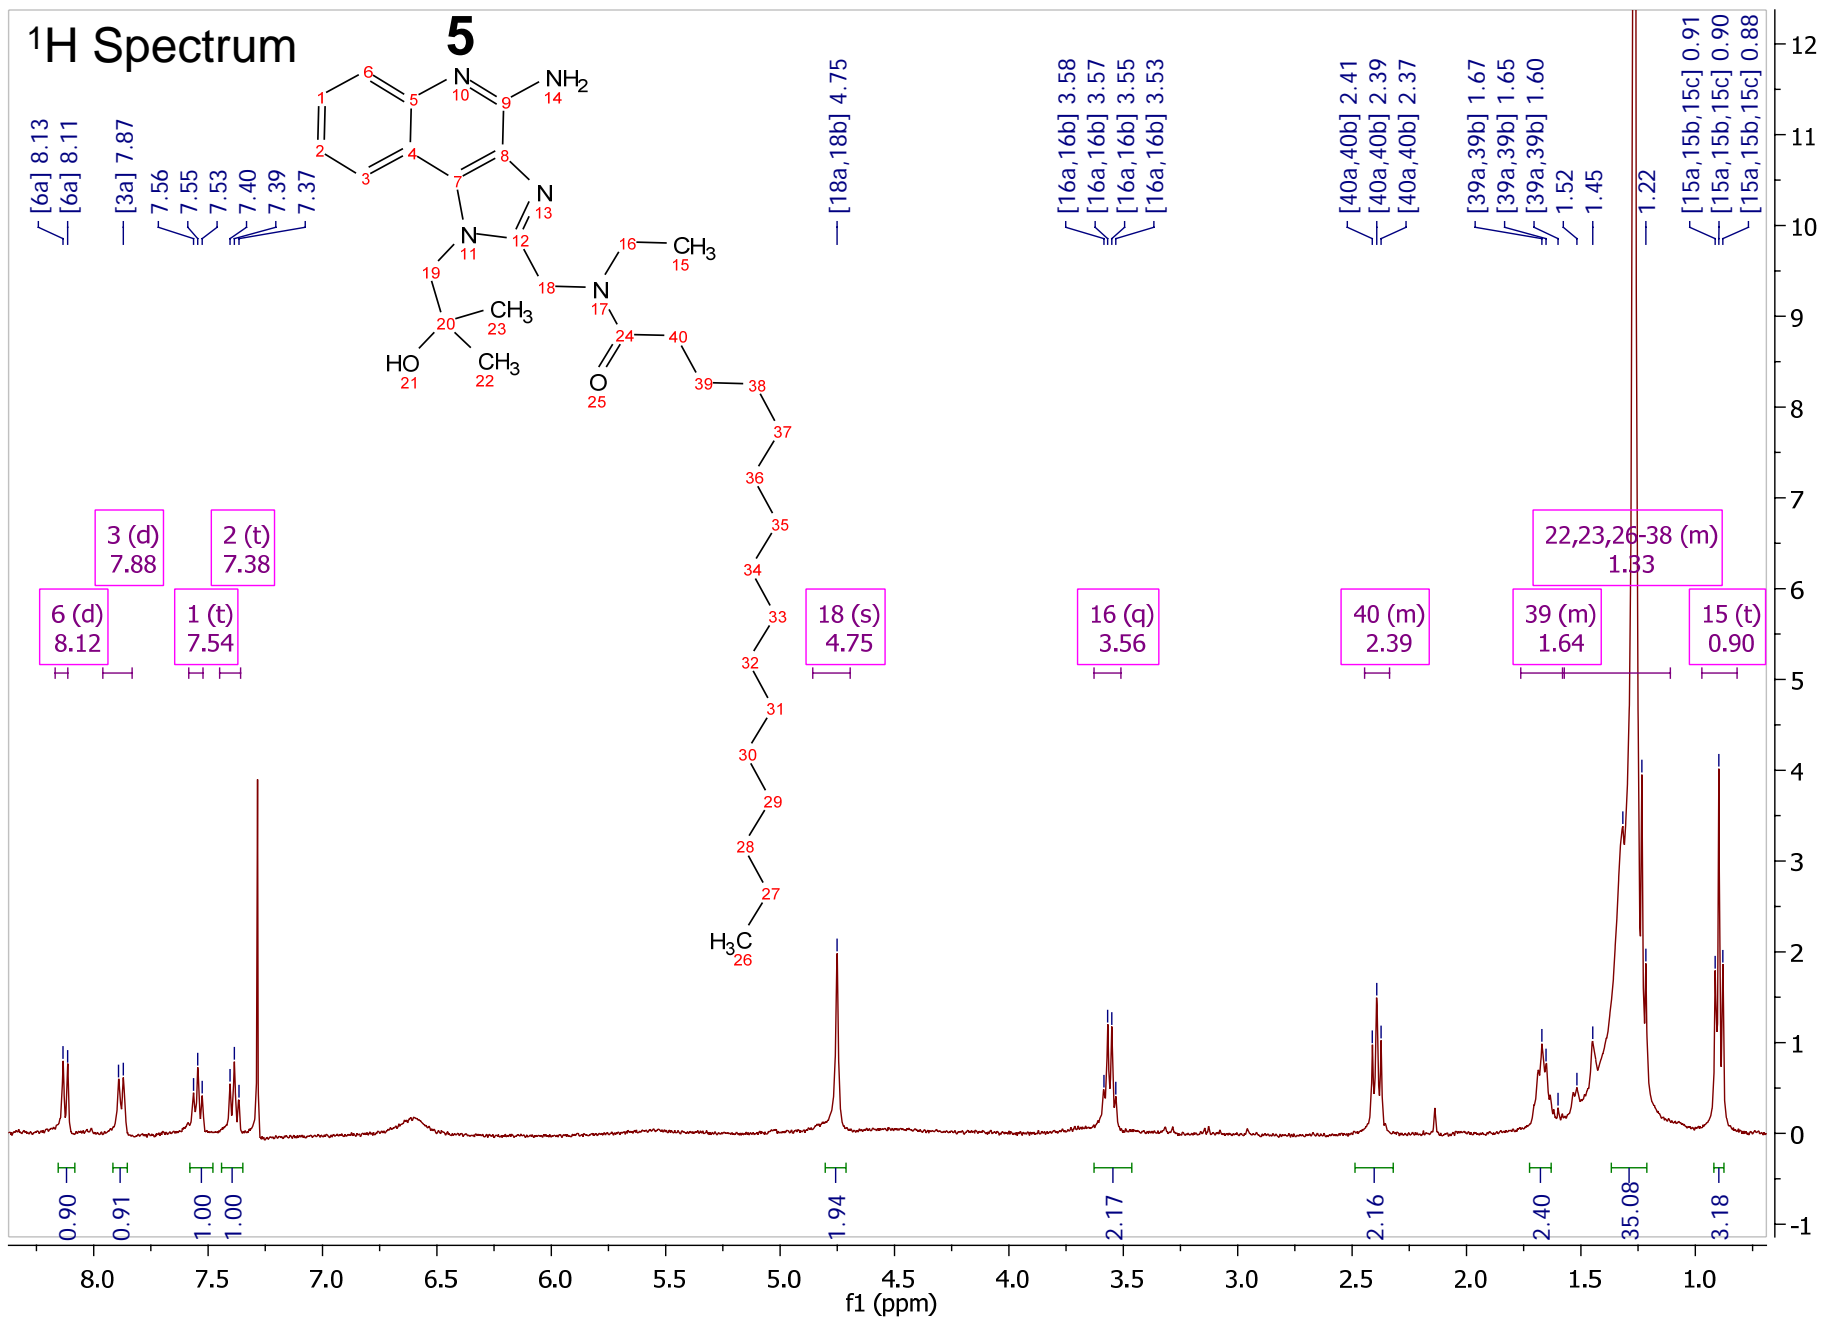



# <sup>13</sup>C Spectrum

5

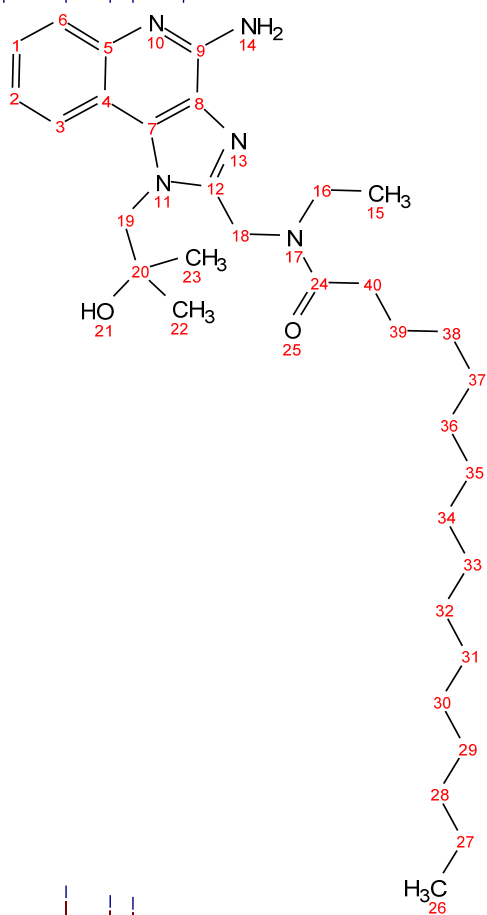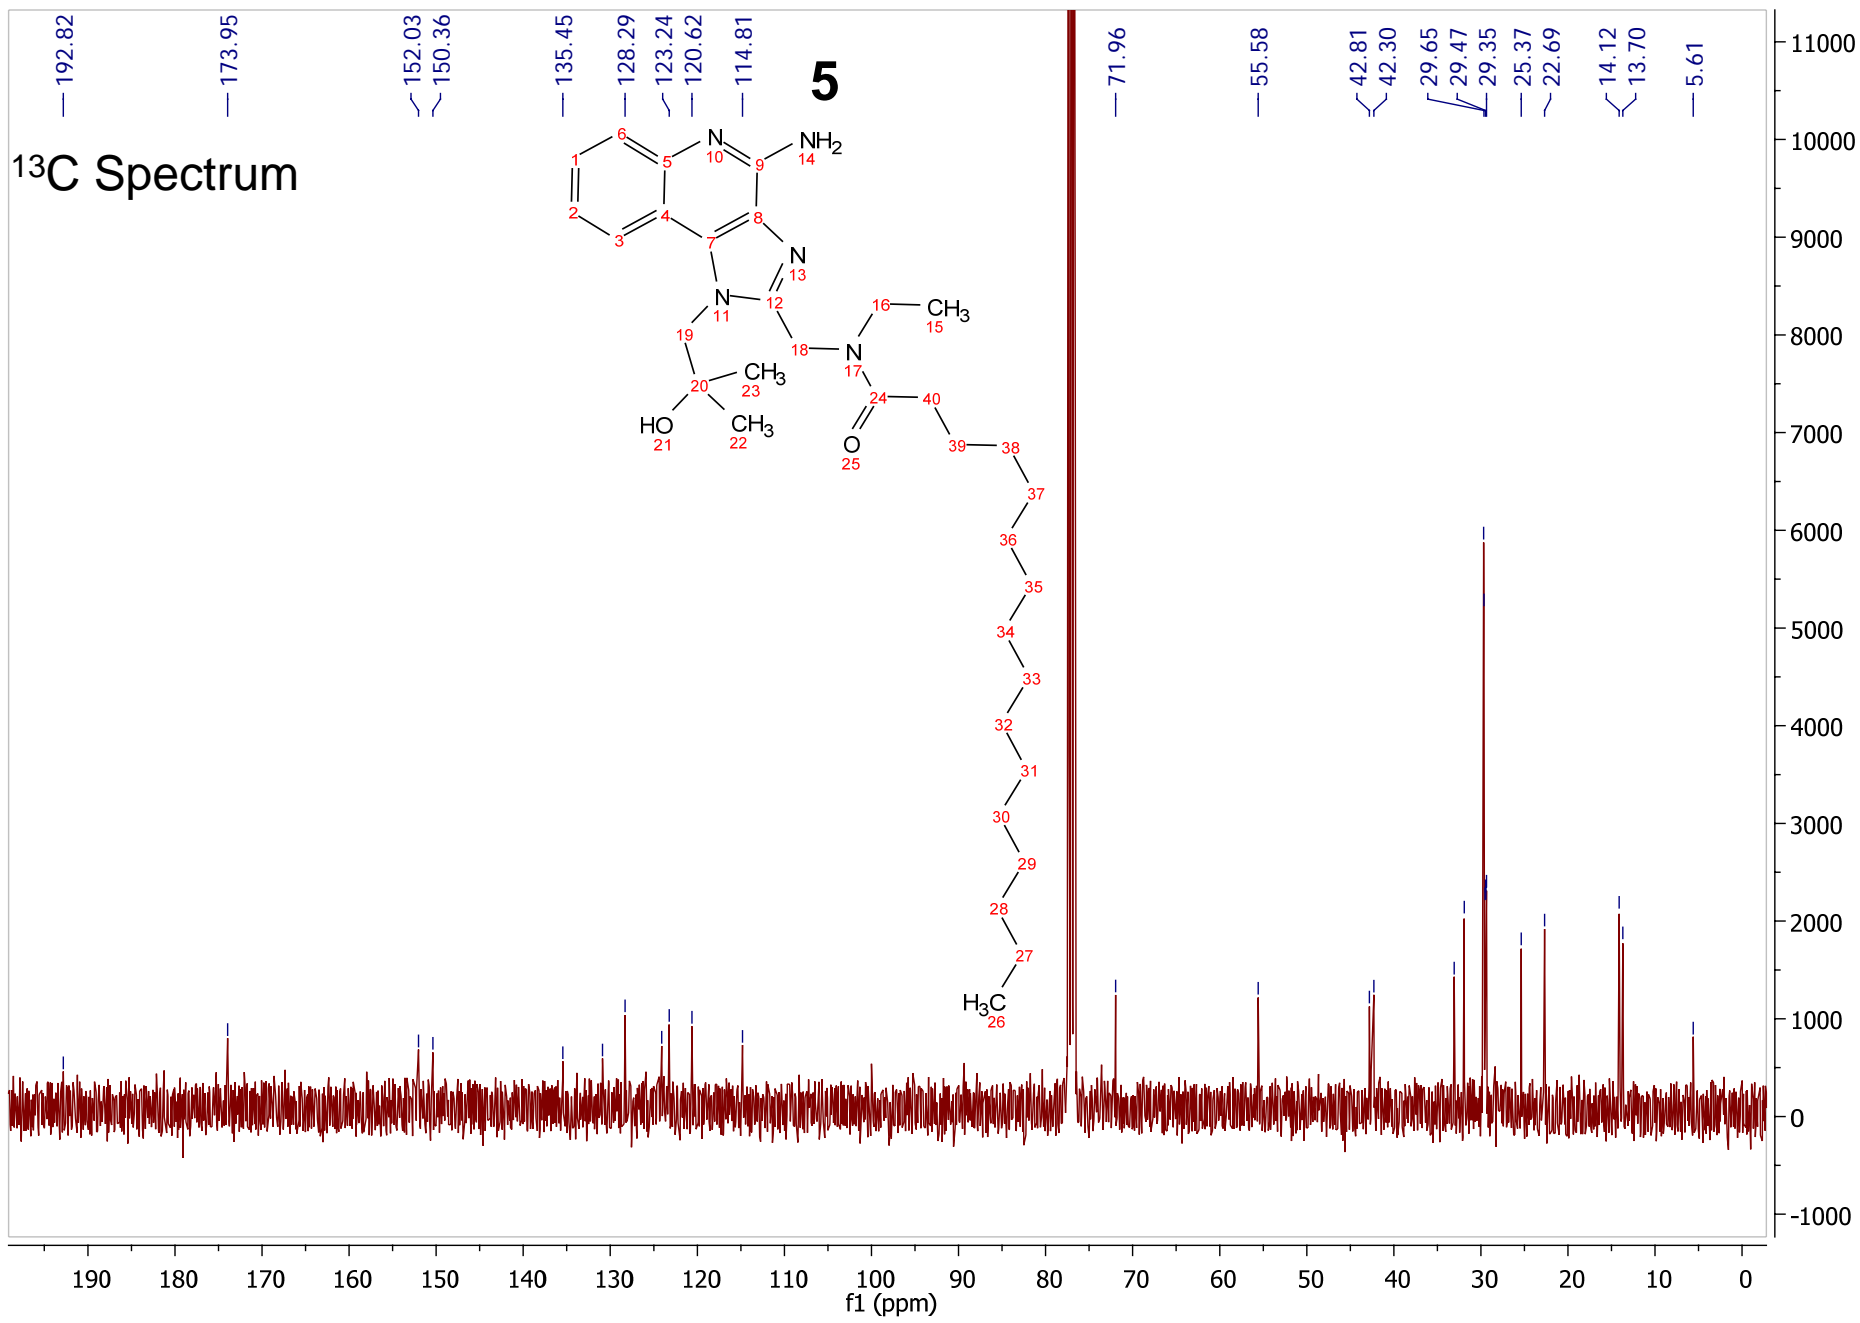

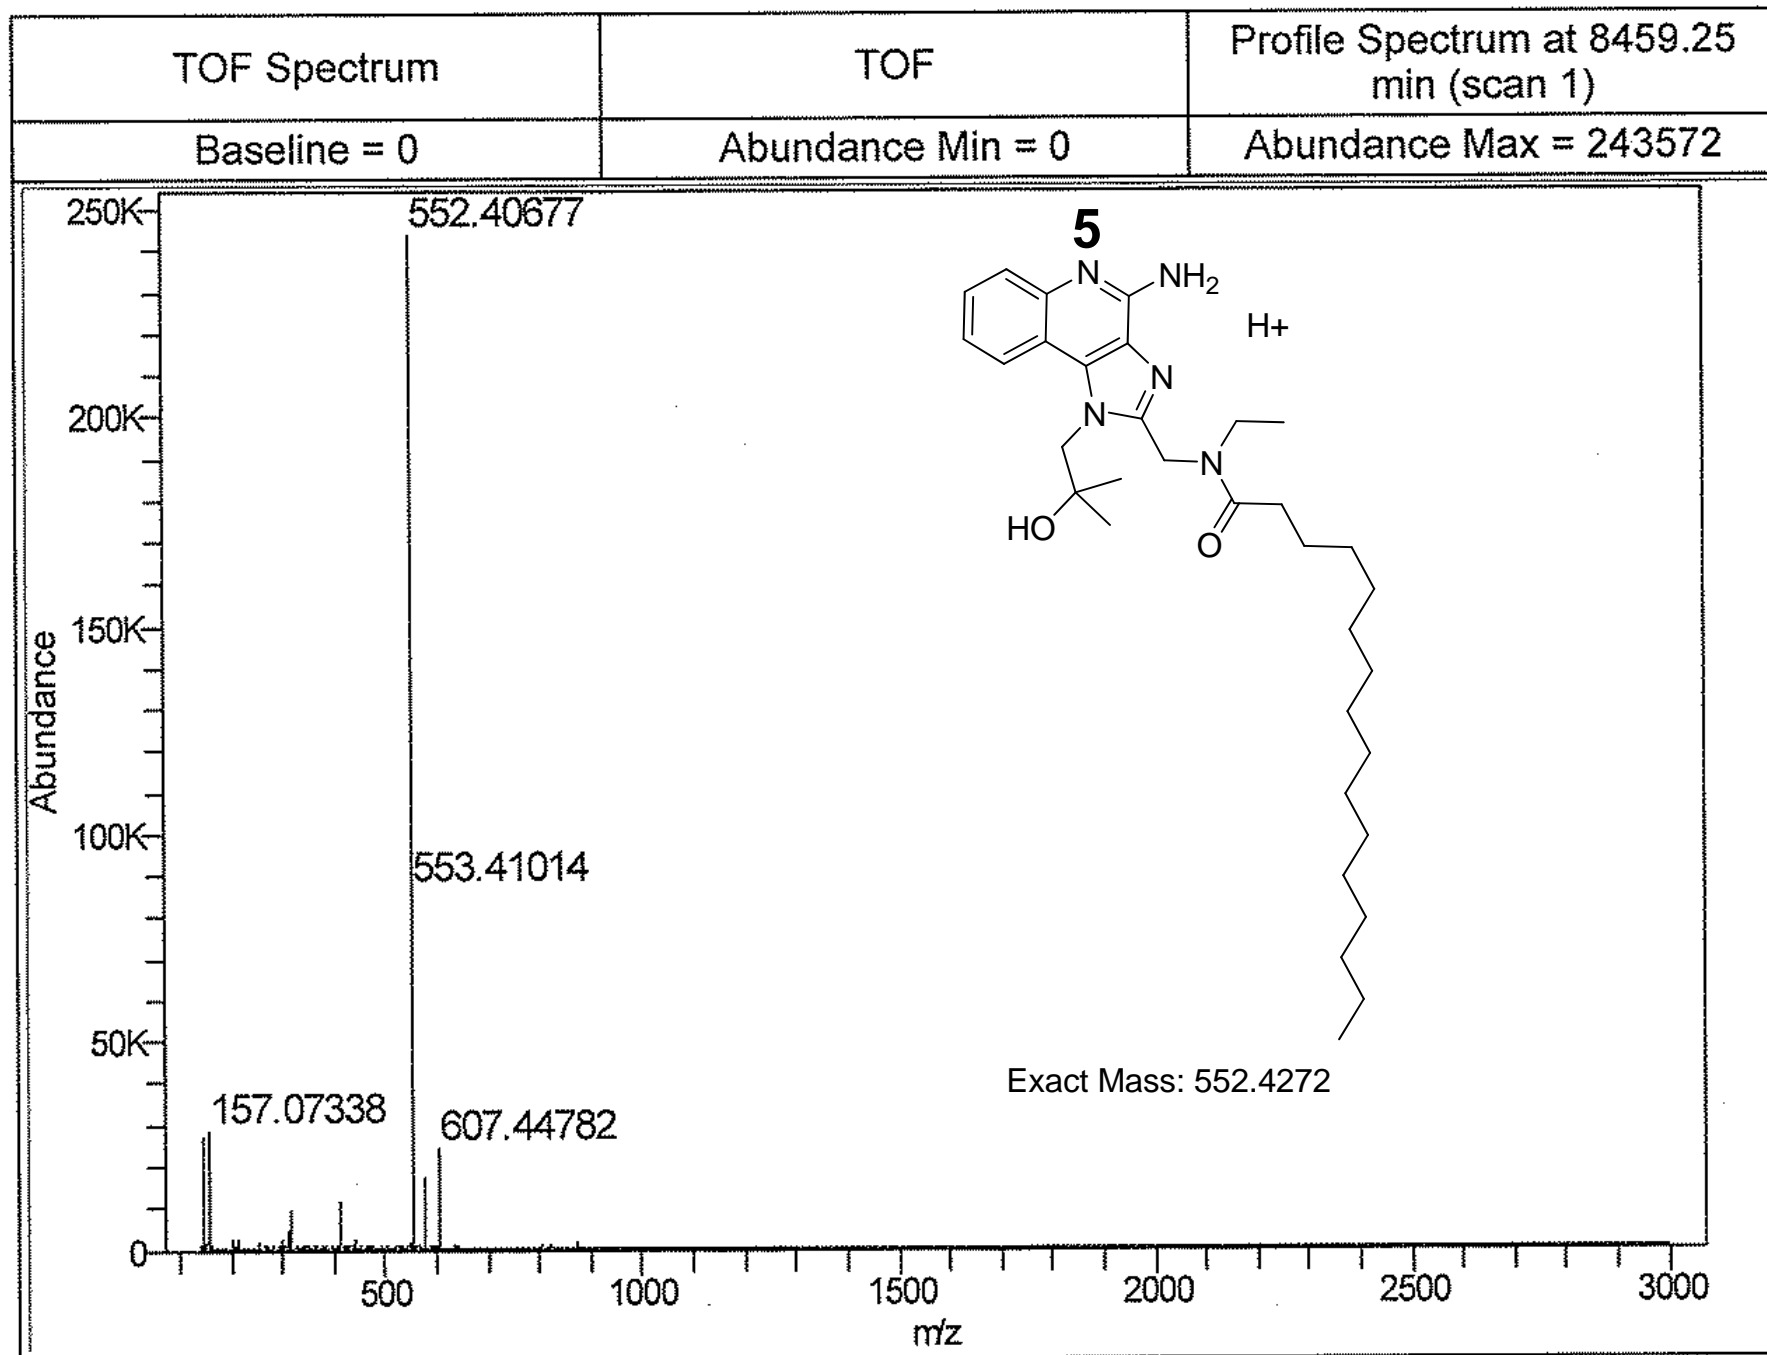

# <sup>1</sup>H Spectrum

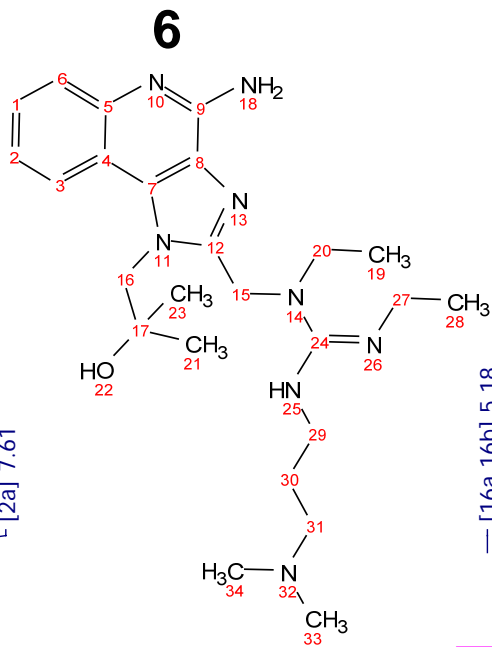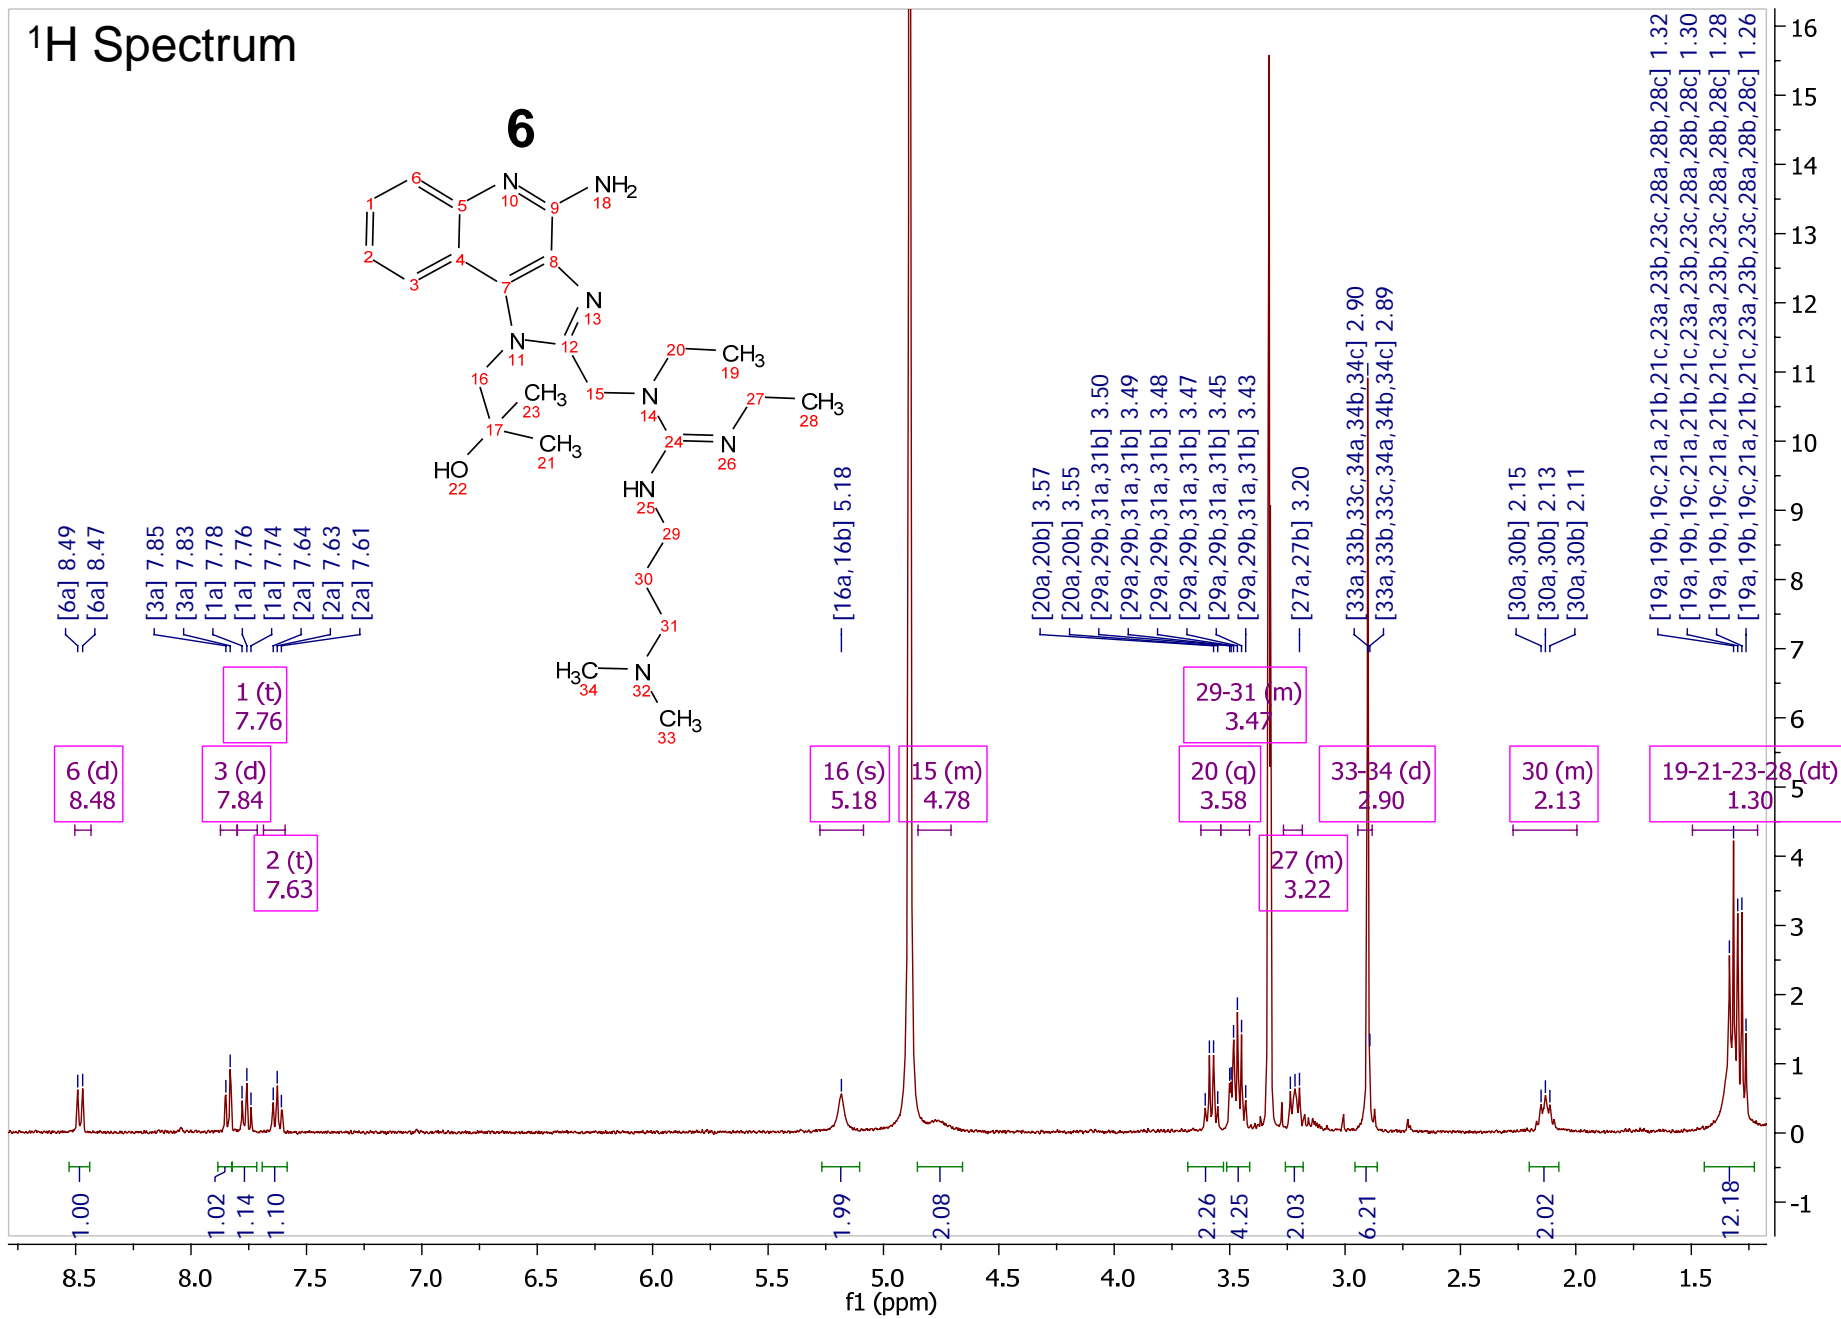

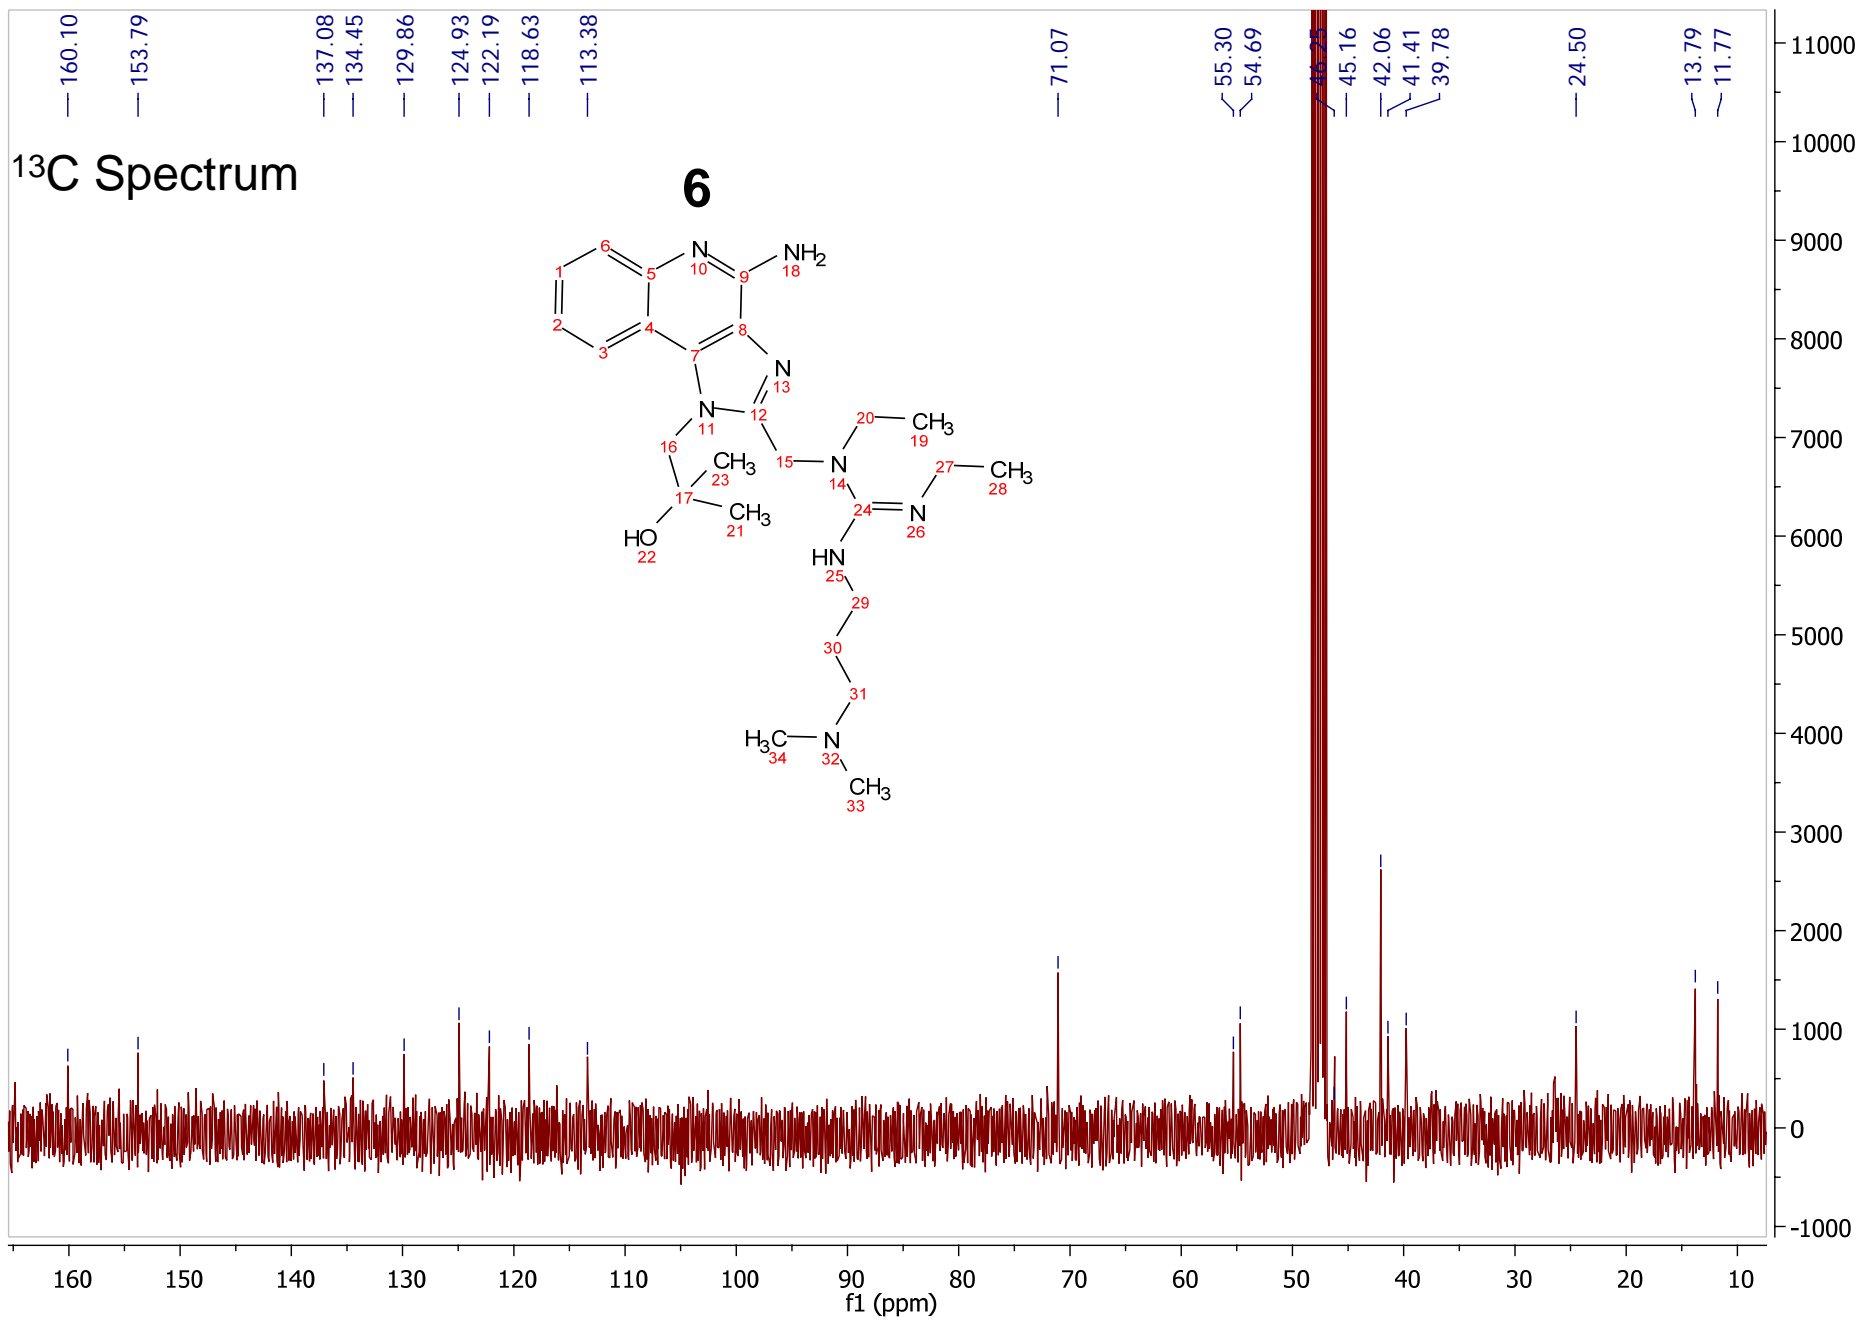

| TOF Spectrum | TOF               | Profile Spectrum at 3928.39 min (scan 1) |
|--------------|-------------------|------------------------------------------|
| Baseline = 0 | Abundance Min = 0 | Abundance Max = 115884                   |

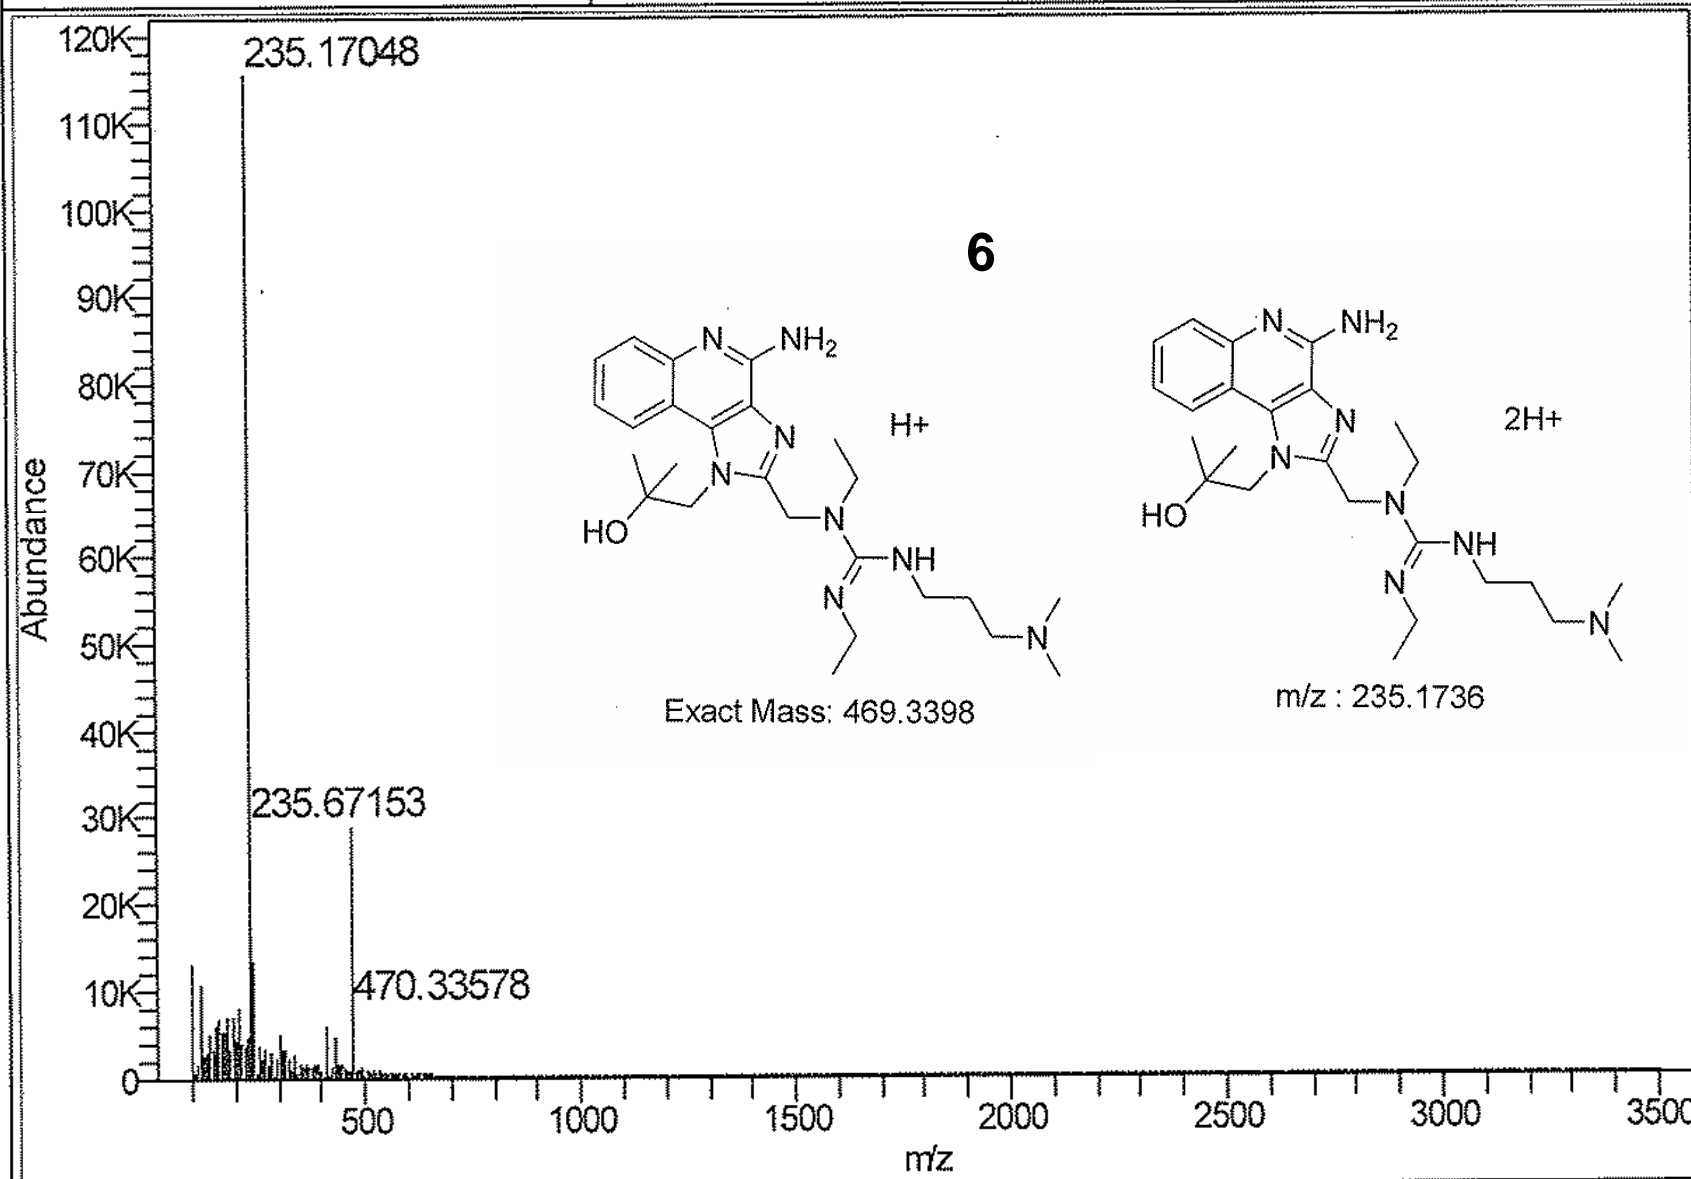

|              |                   |                                            |
|--------------|-------------------|--------------------------------------------|
| TOF Spectrum | TOF               | Profile Spectrum at 202.33 min<br>(scan 1) |
| Baseline = 0 | Abundance Min = 0 | Abundance Max = 189351                     |

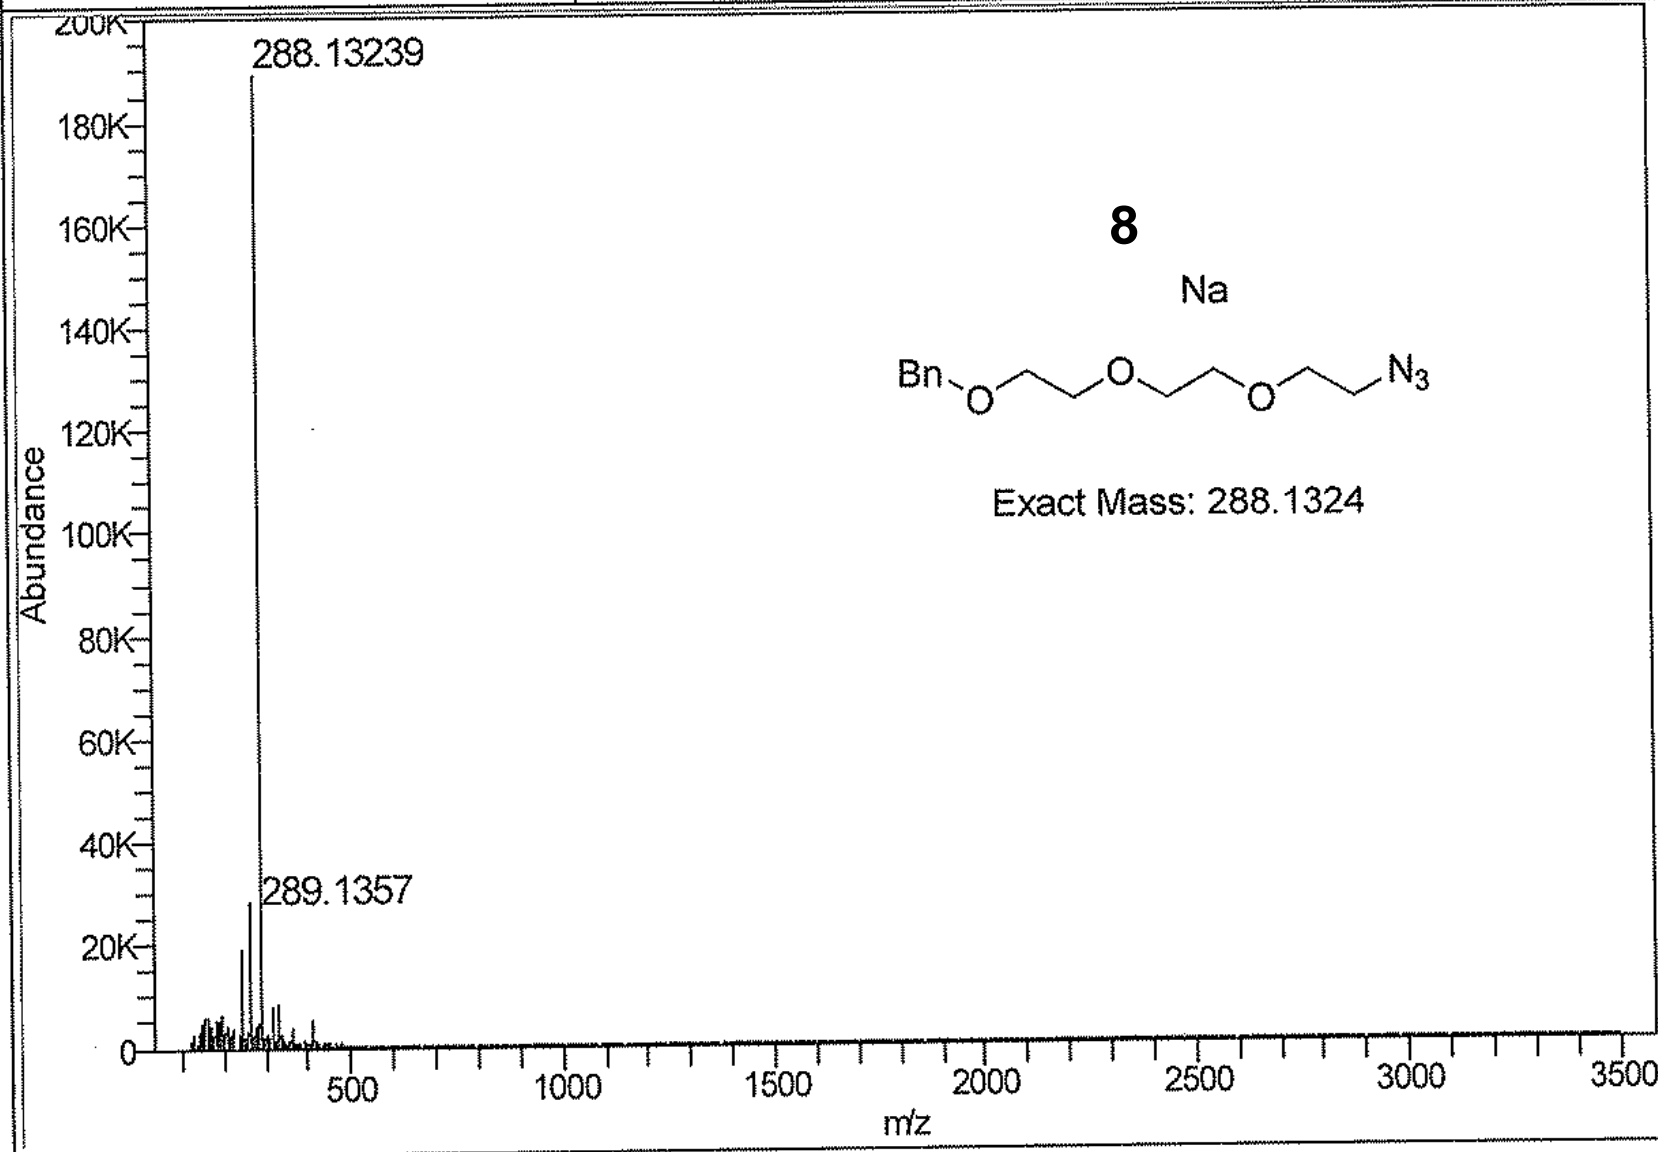

# <sup>1</sup>H Spectrum

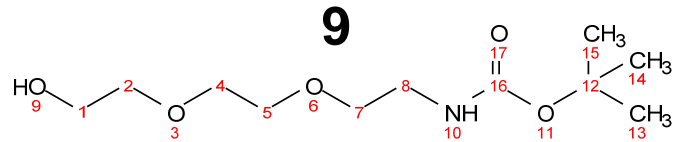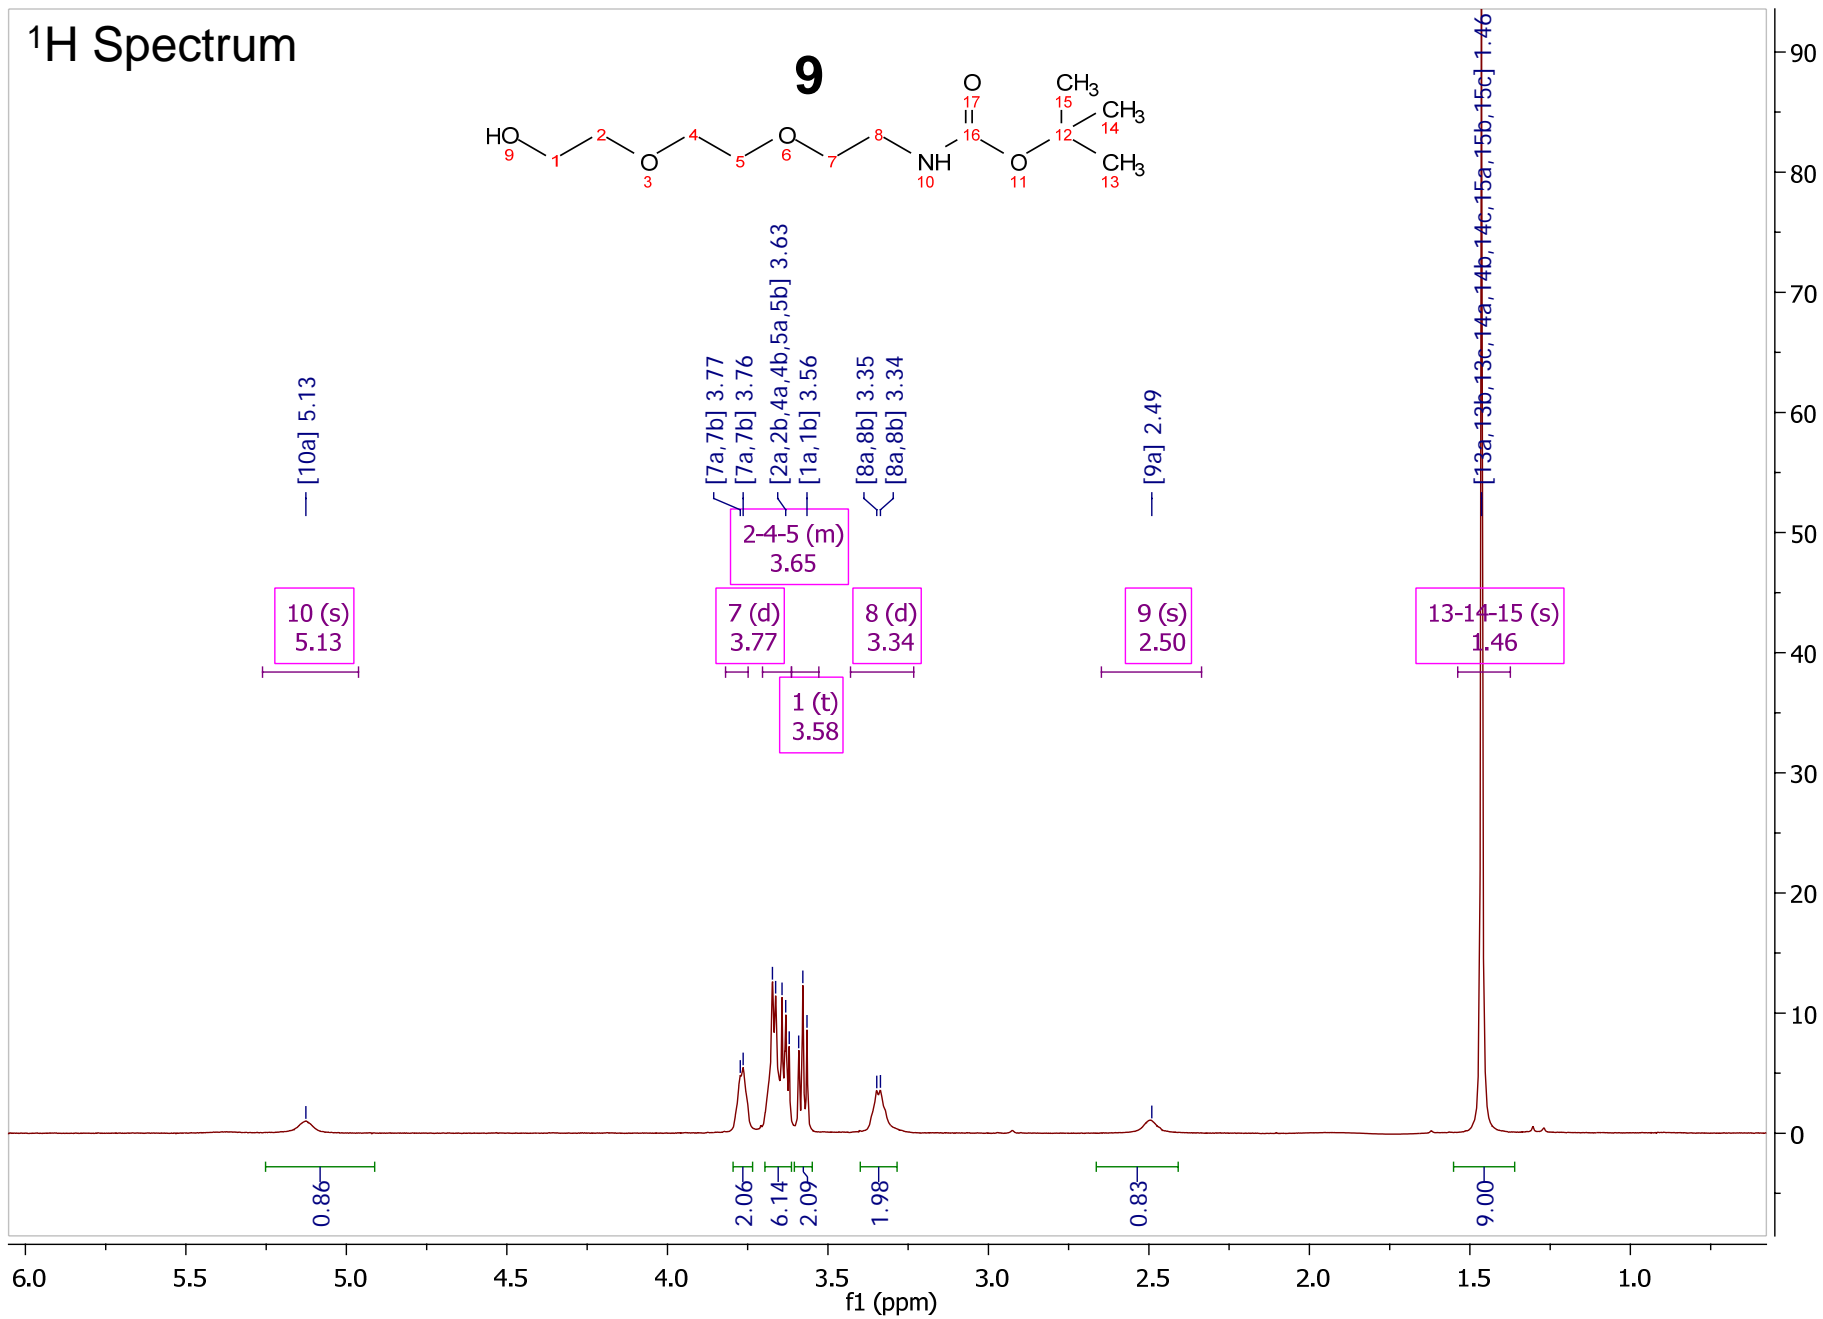

# <sup>13</sup>C Spectrum

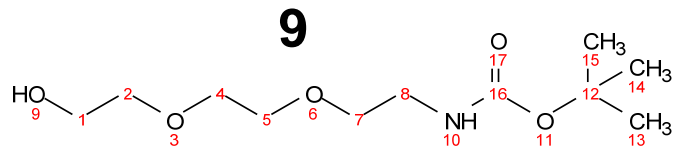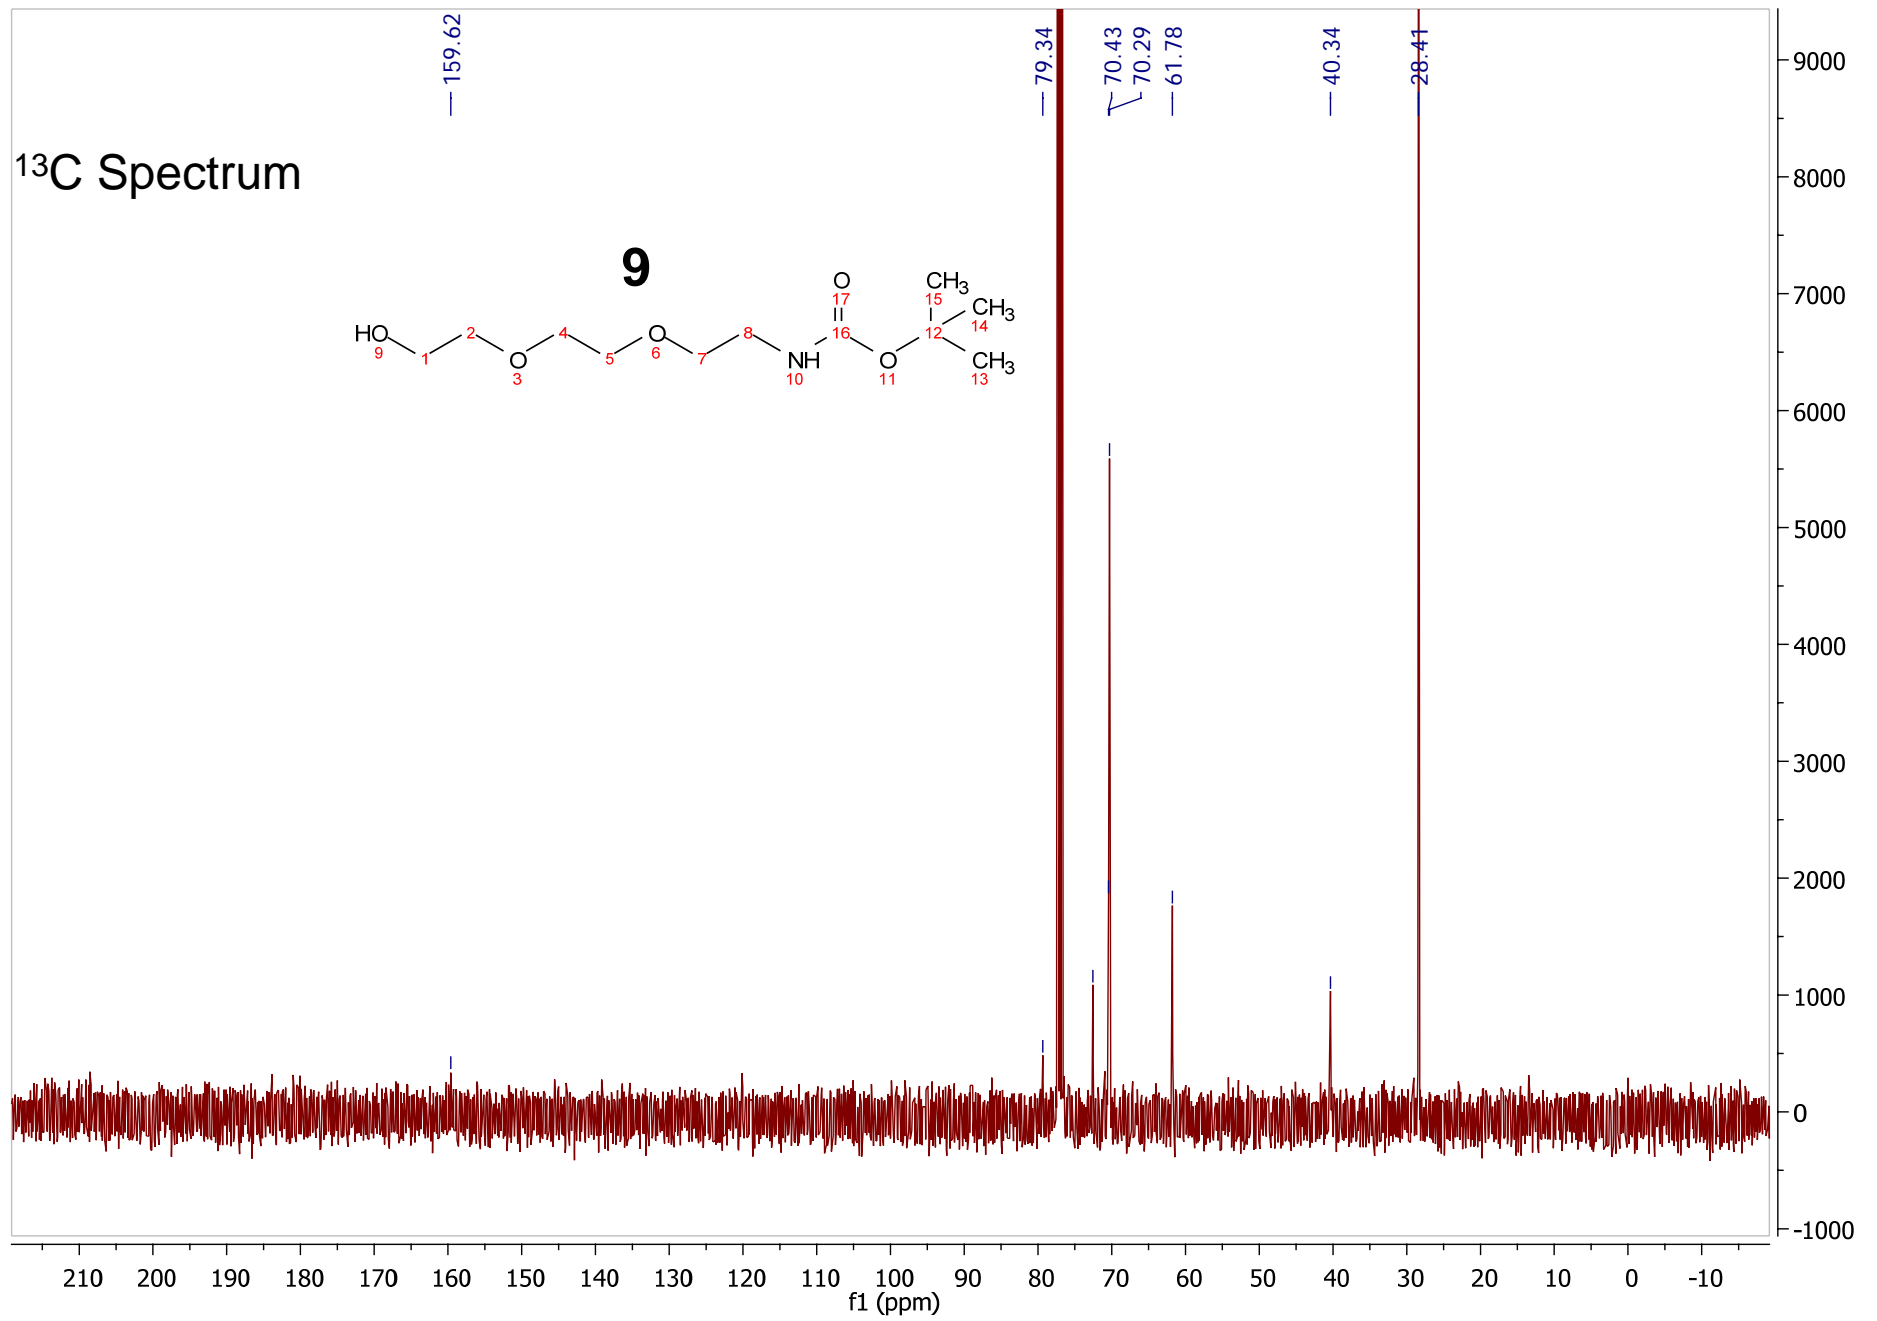



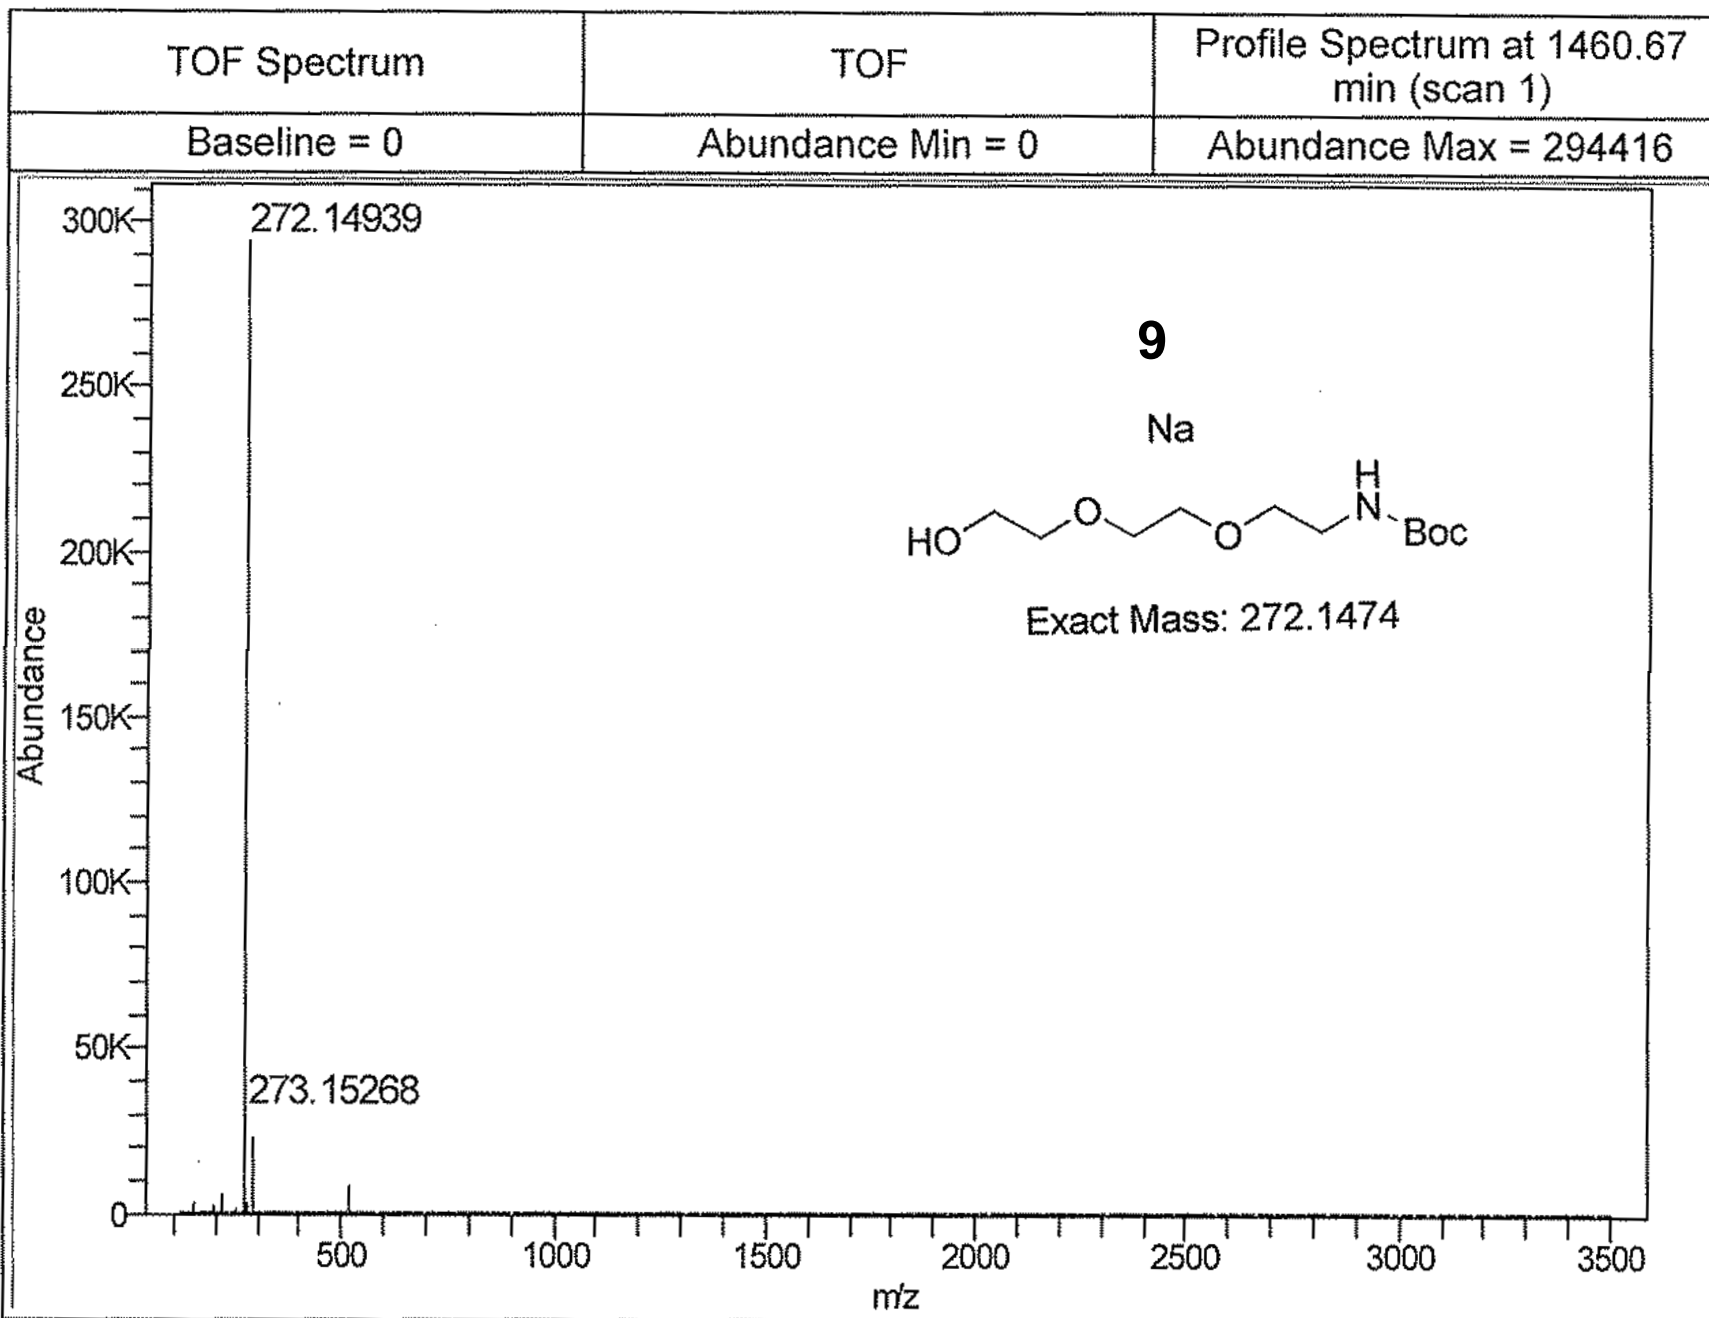

# <sup>1</sup>H Spectrum

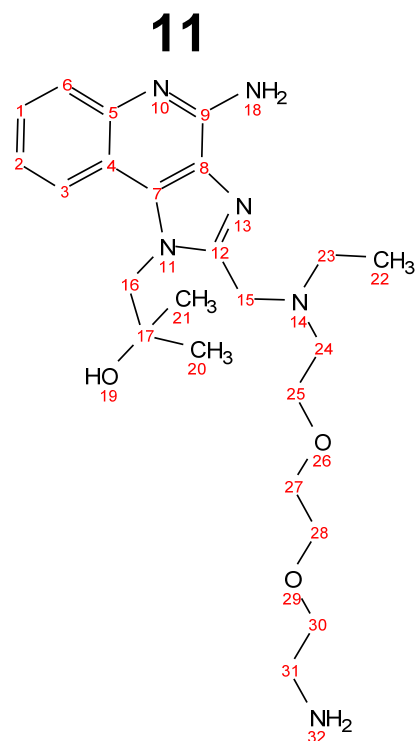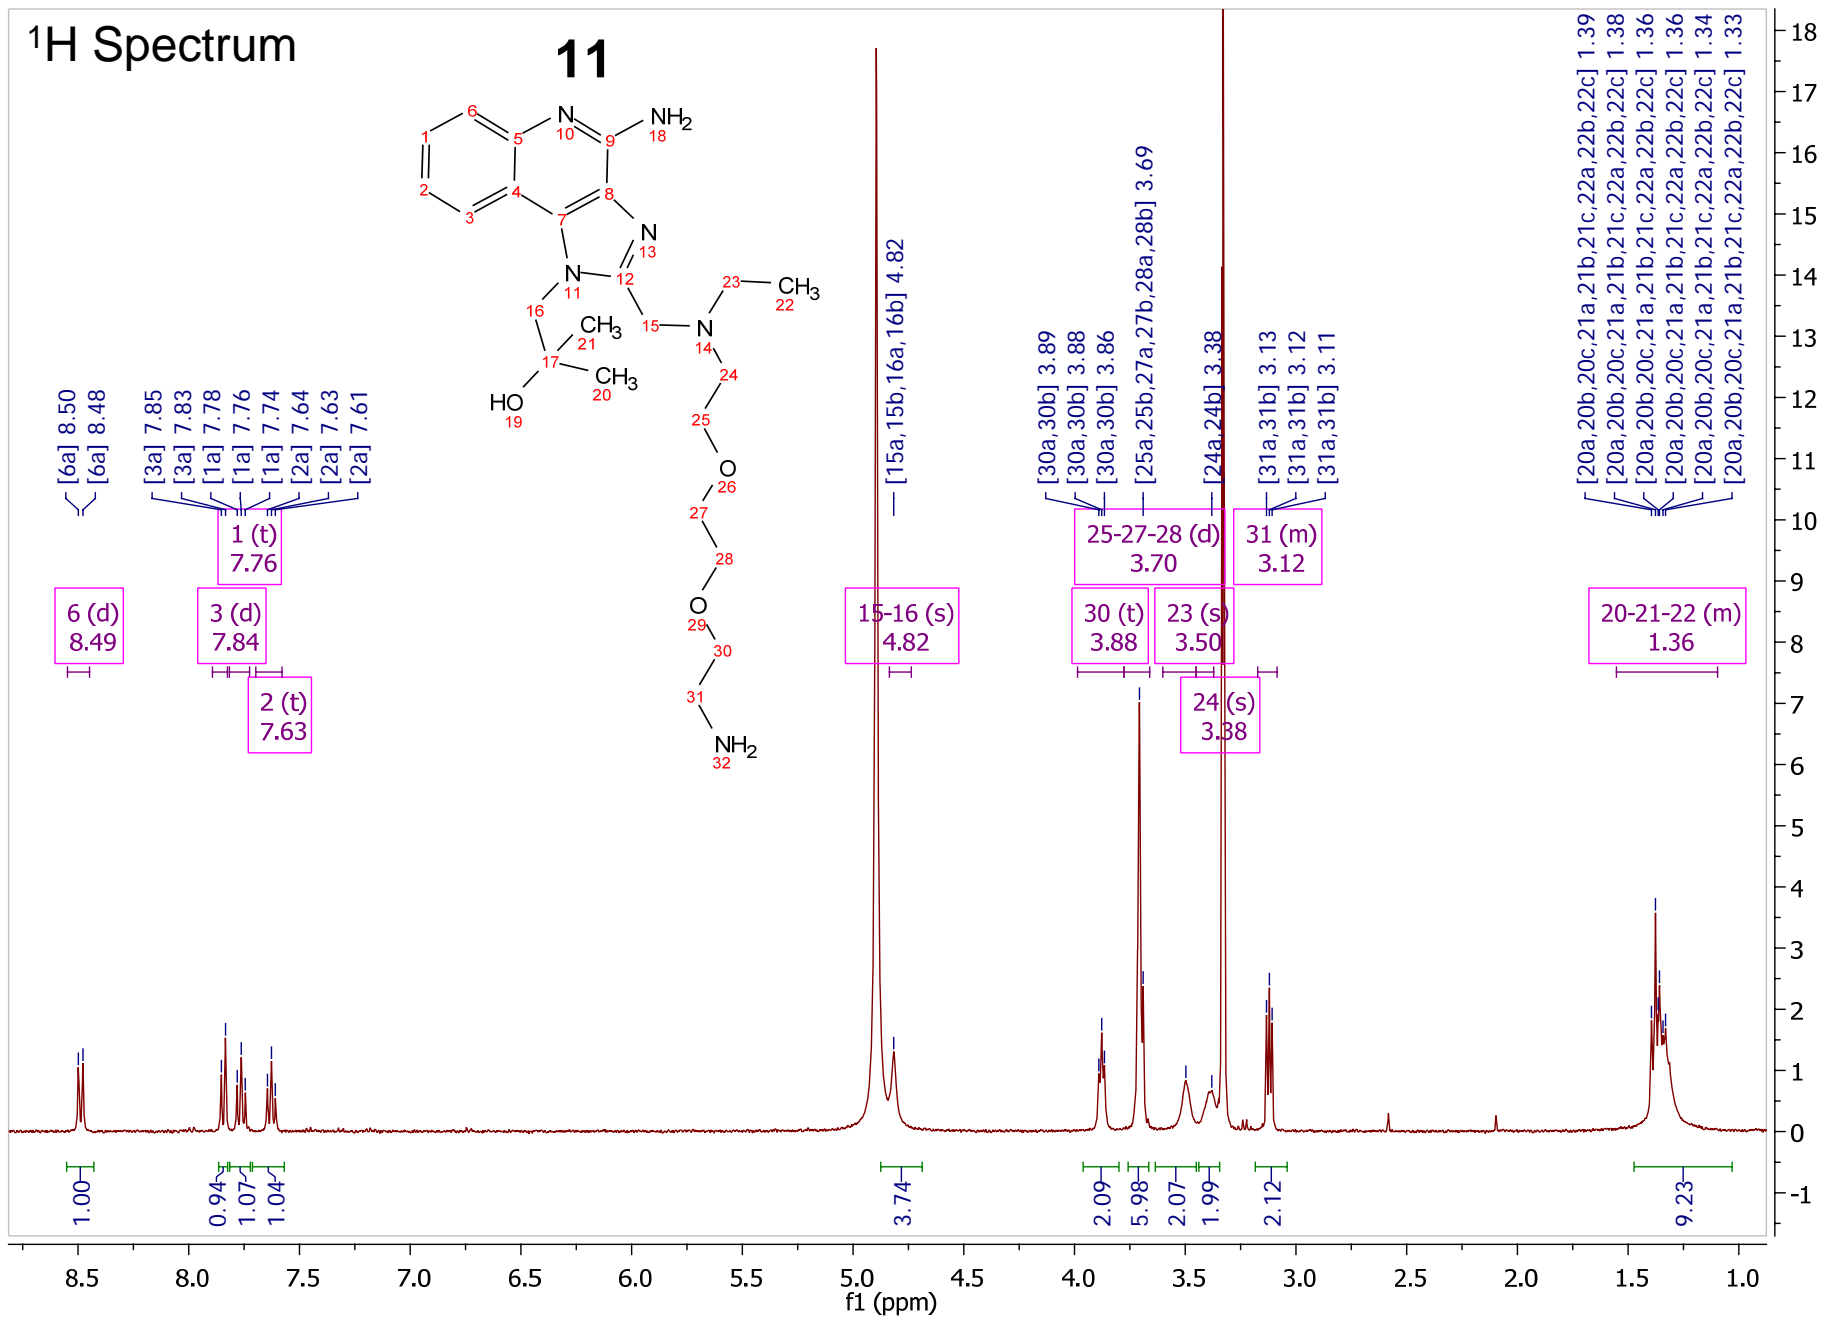

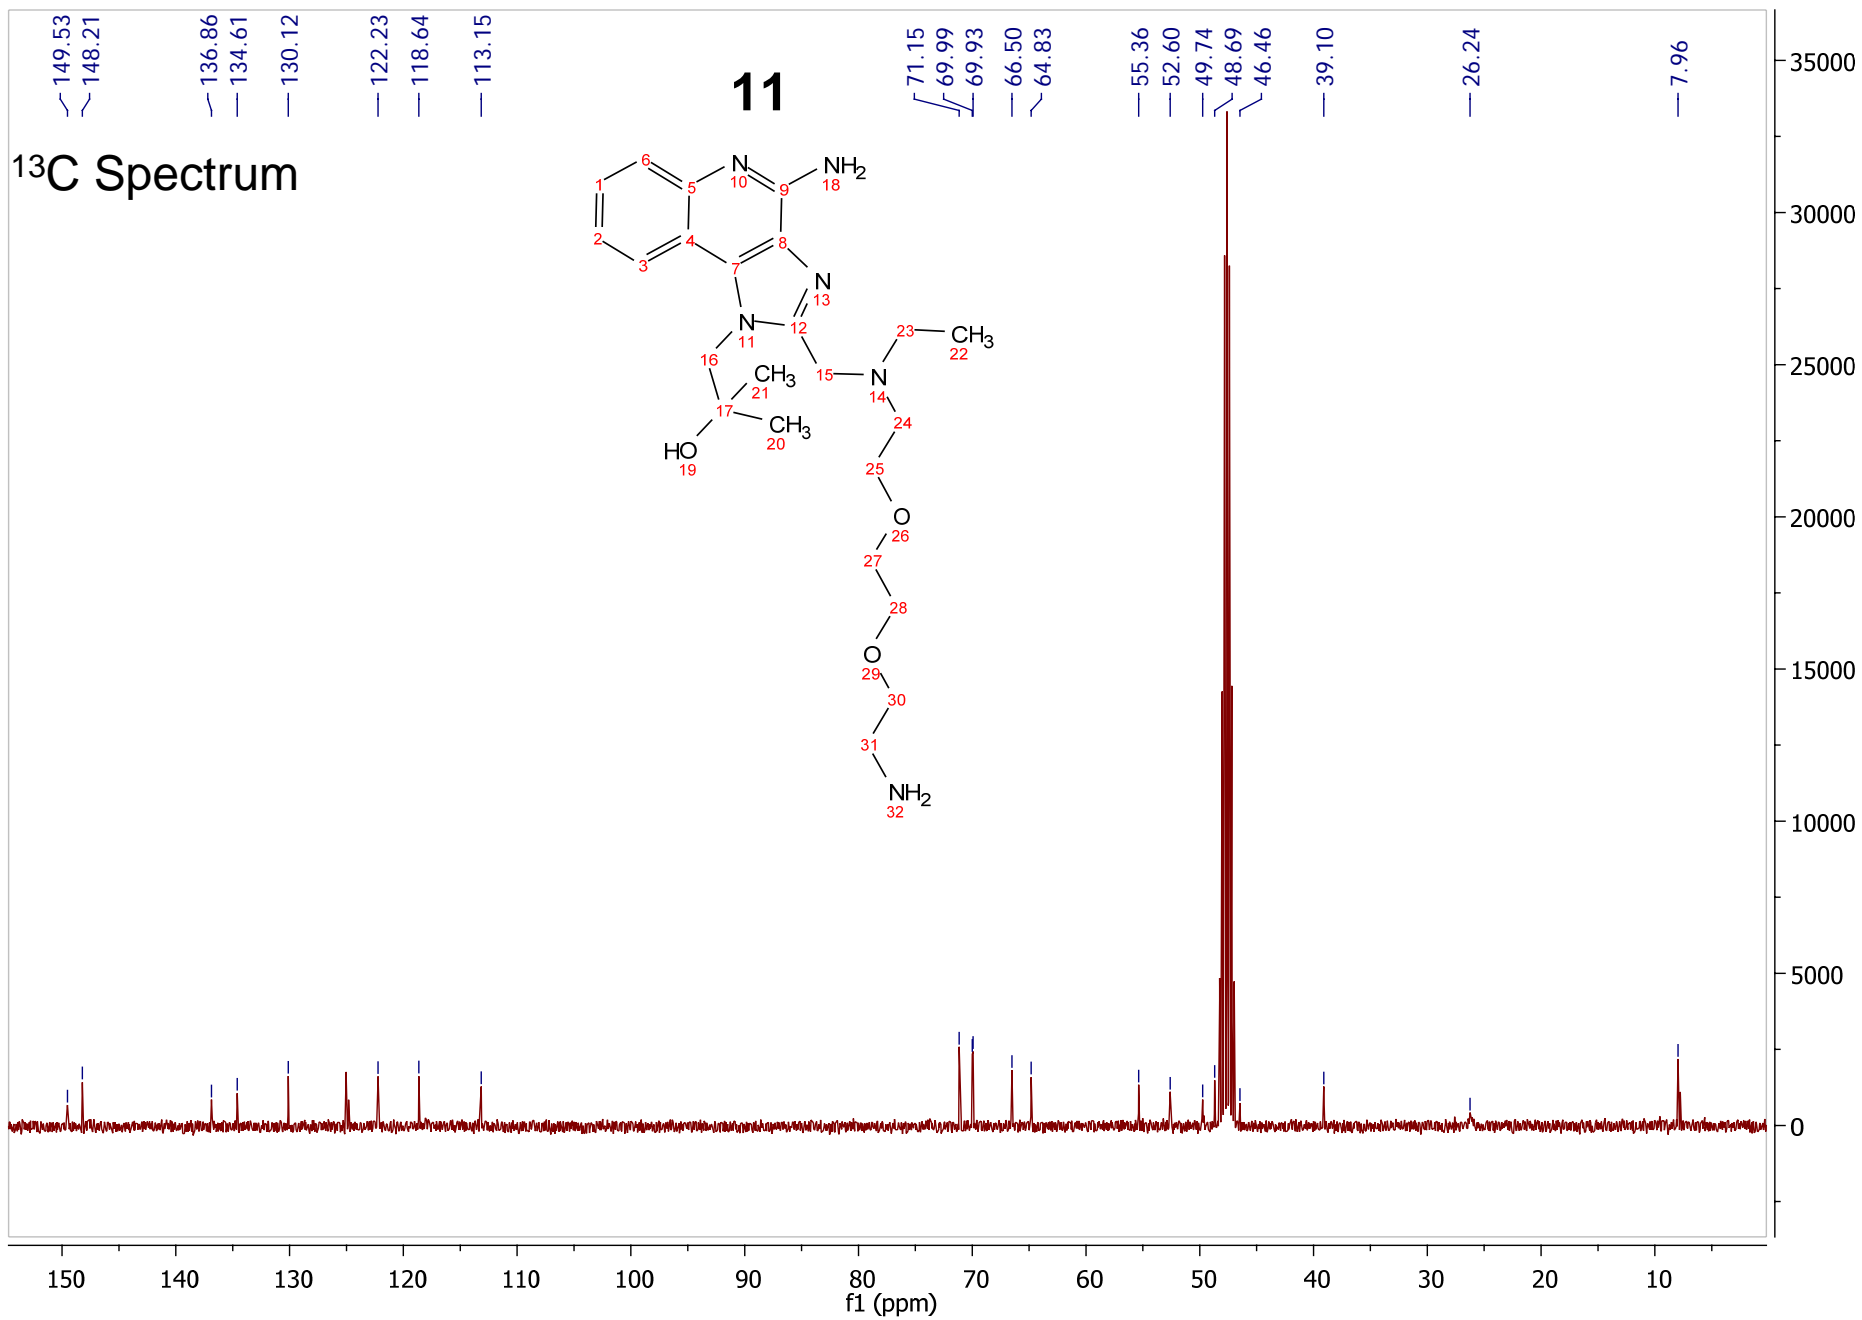

|              |                   |                                          |
|--------------|-------------------|------------------------------------------|
| TOF Spectrum | TOF               | Profile Spectrum at 3238.79 min (scan 1) |
| Baseline = 0 | Abundance Min = 0 | Abundance Max = 559102                   |

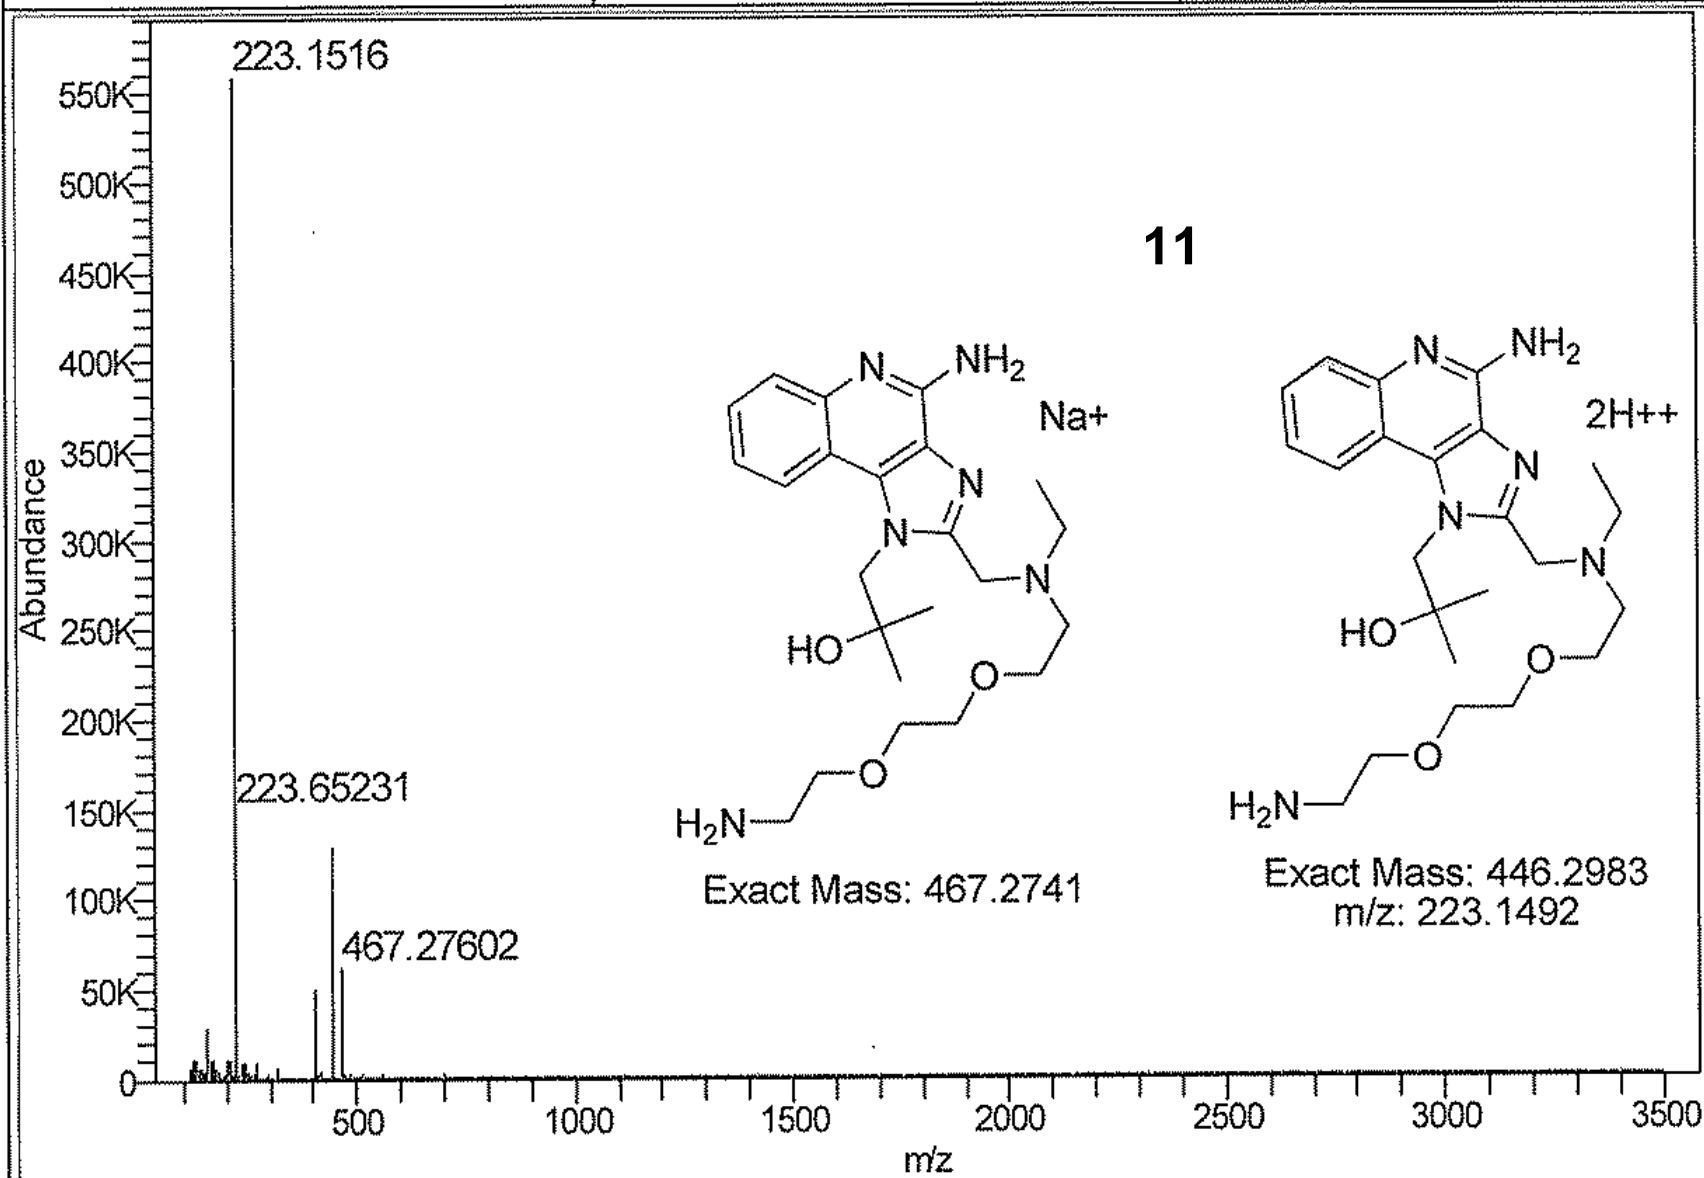

# <sup>1</sup>H Spectrum

## 12

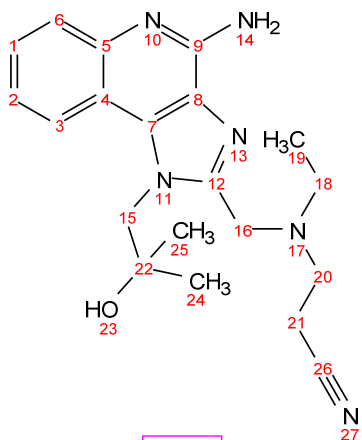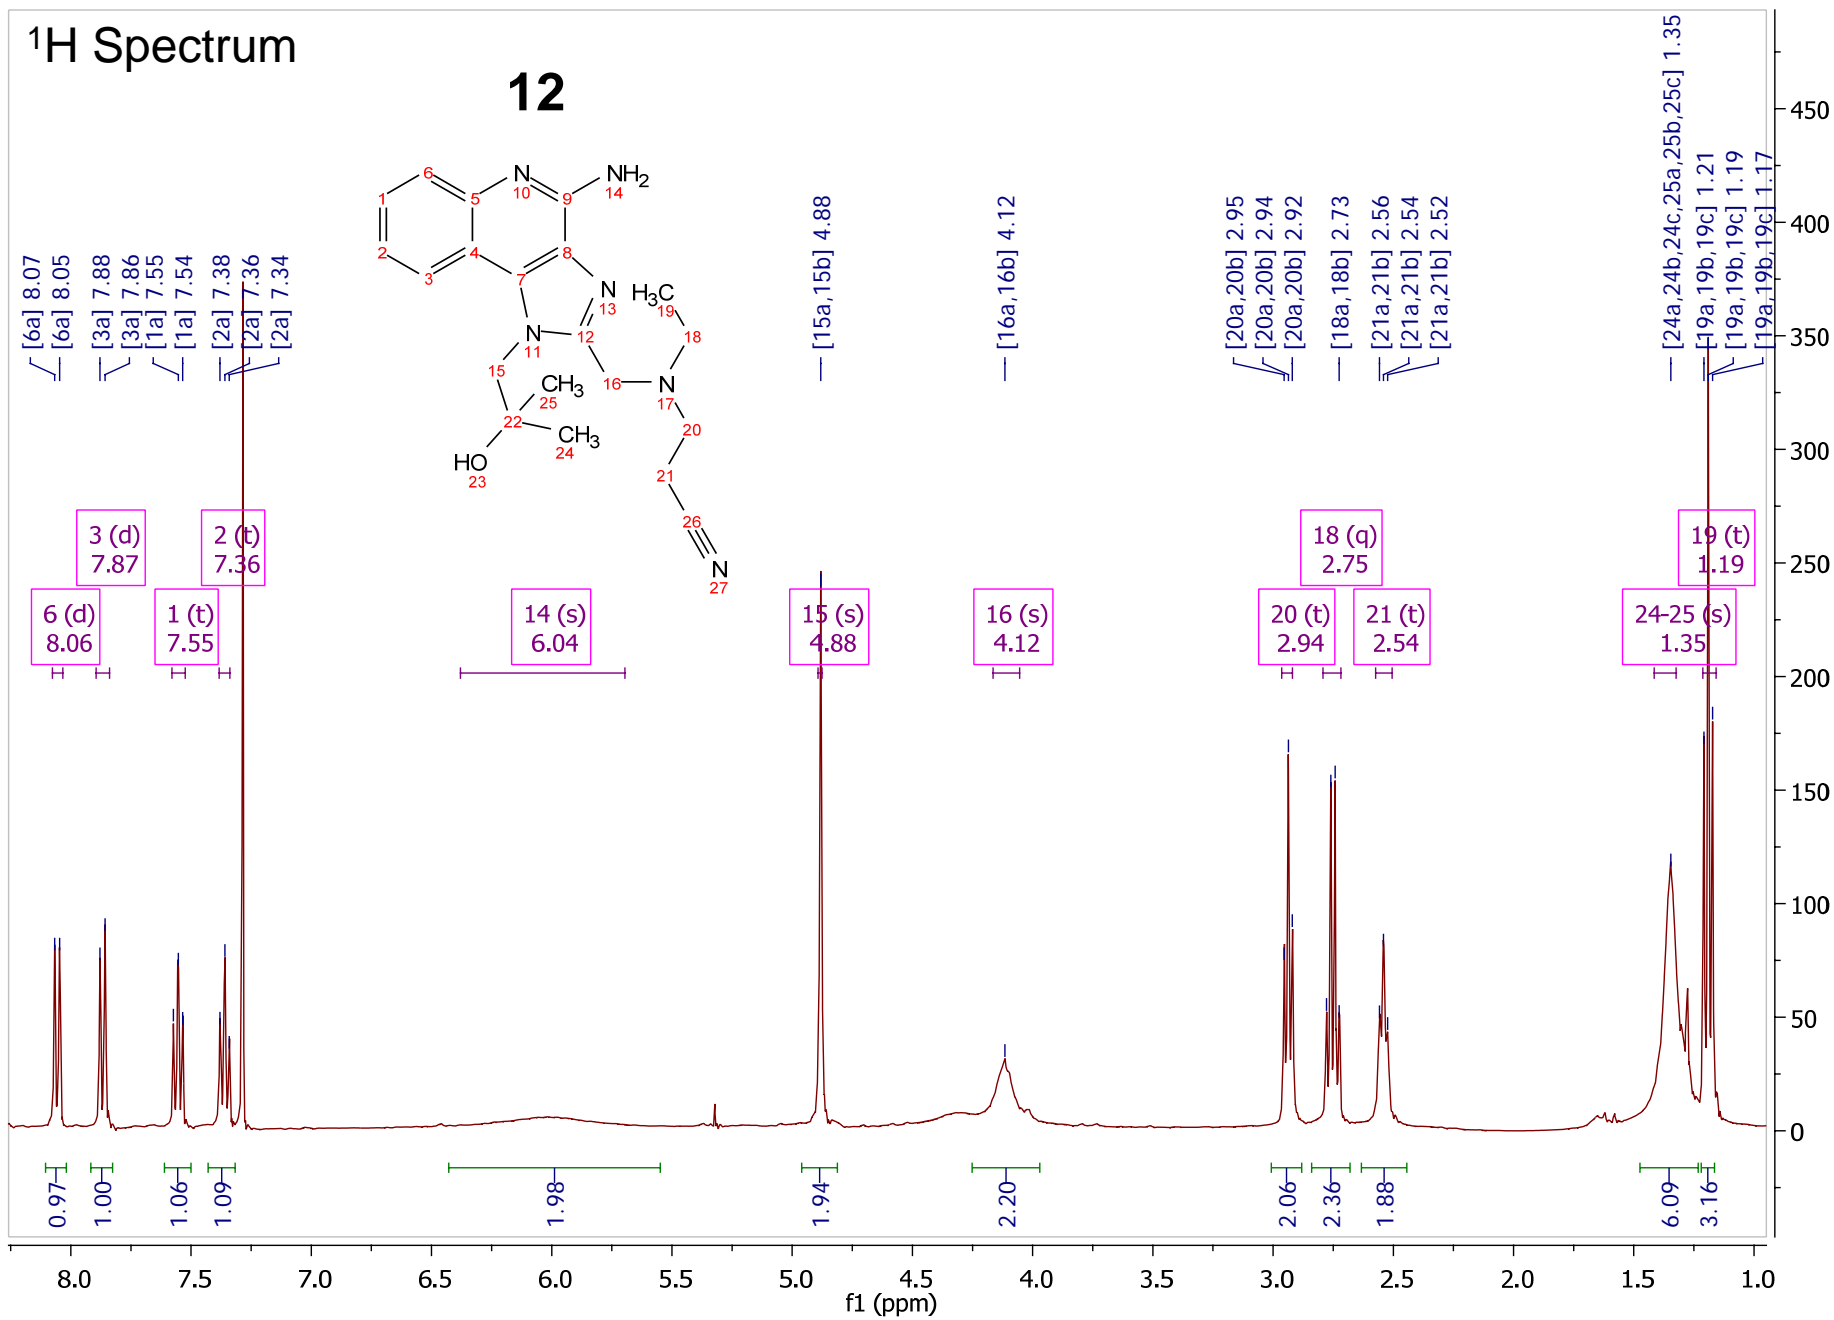

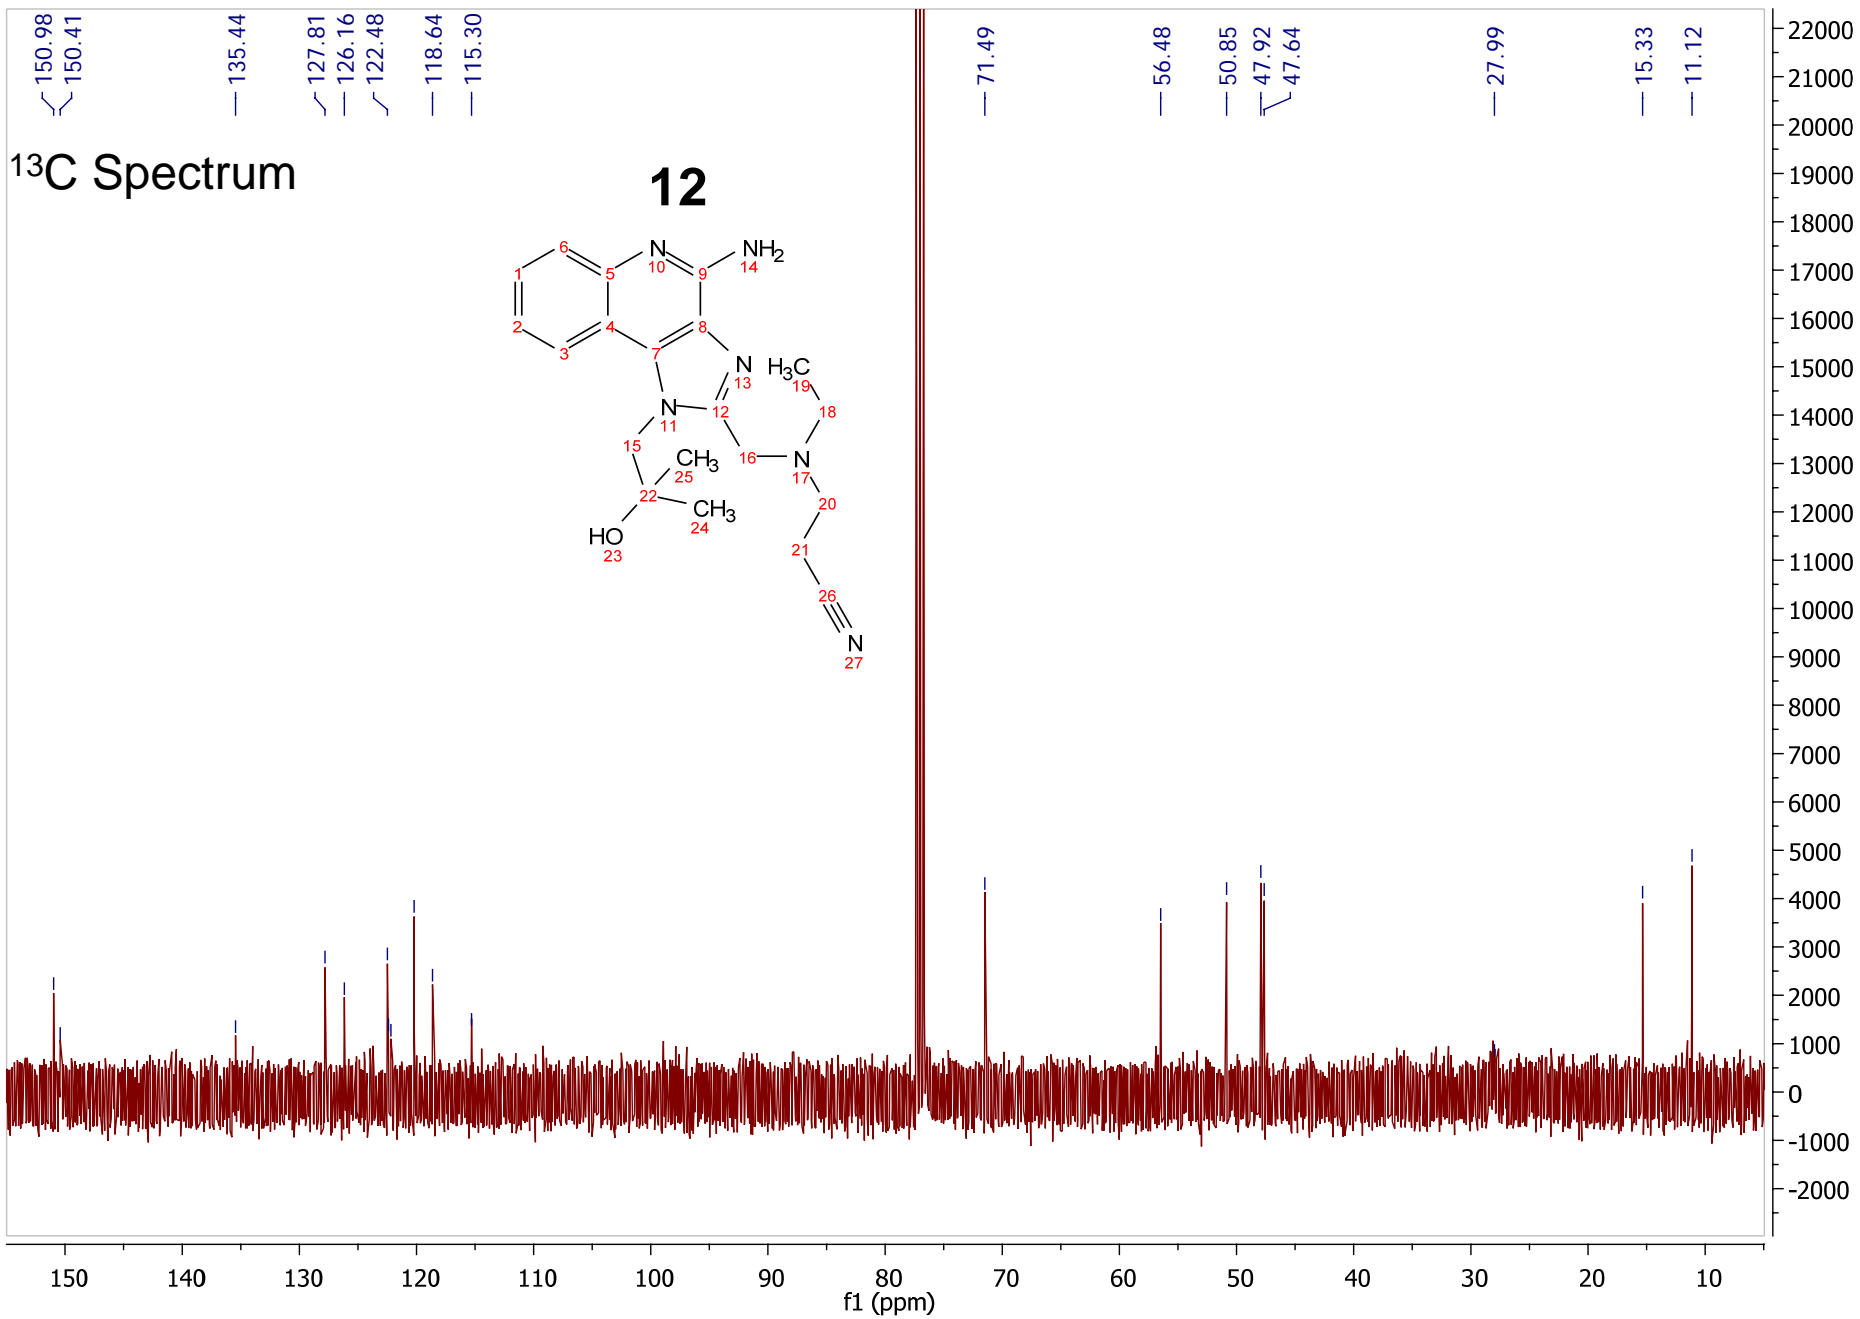

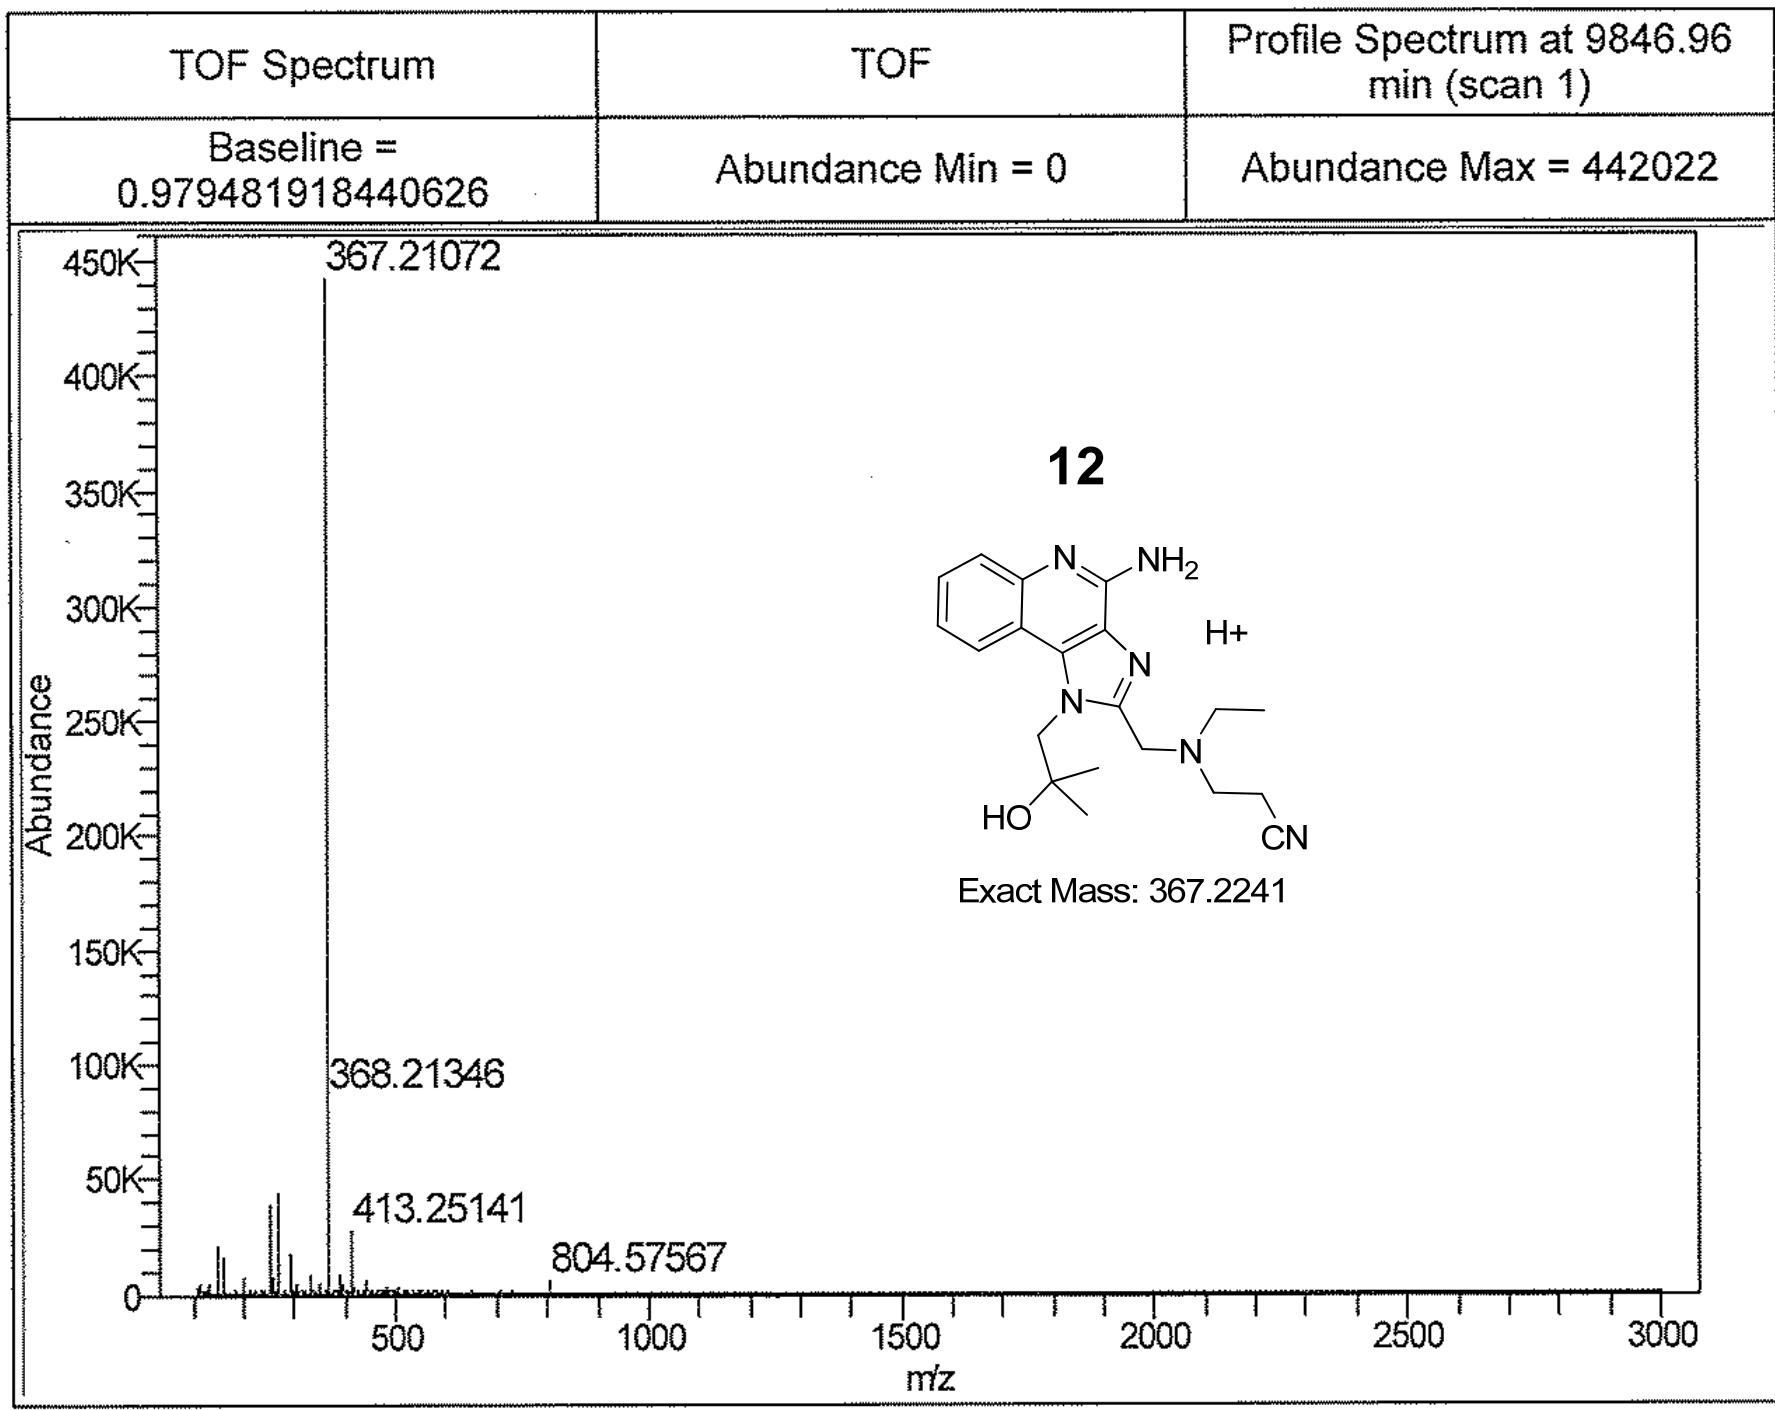

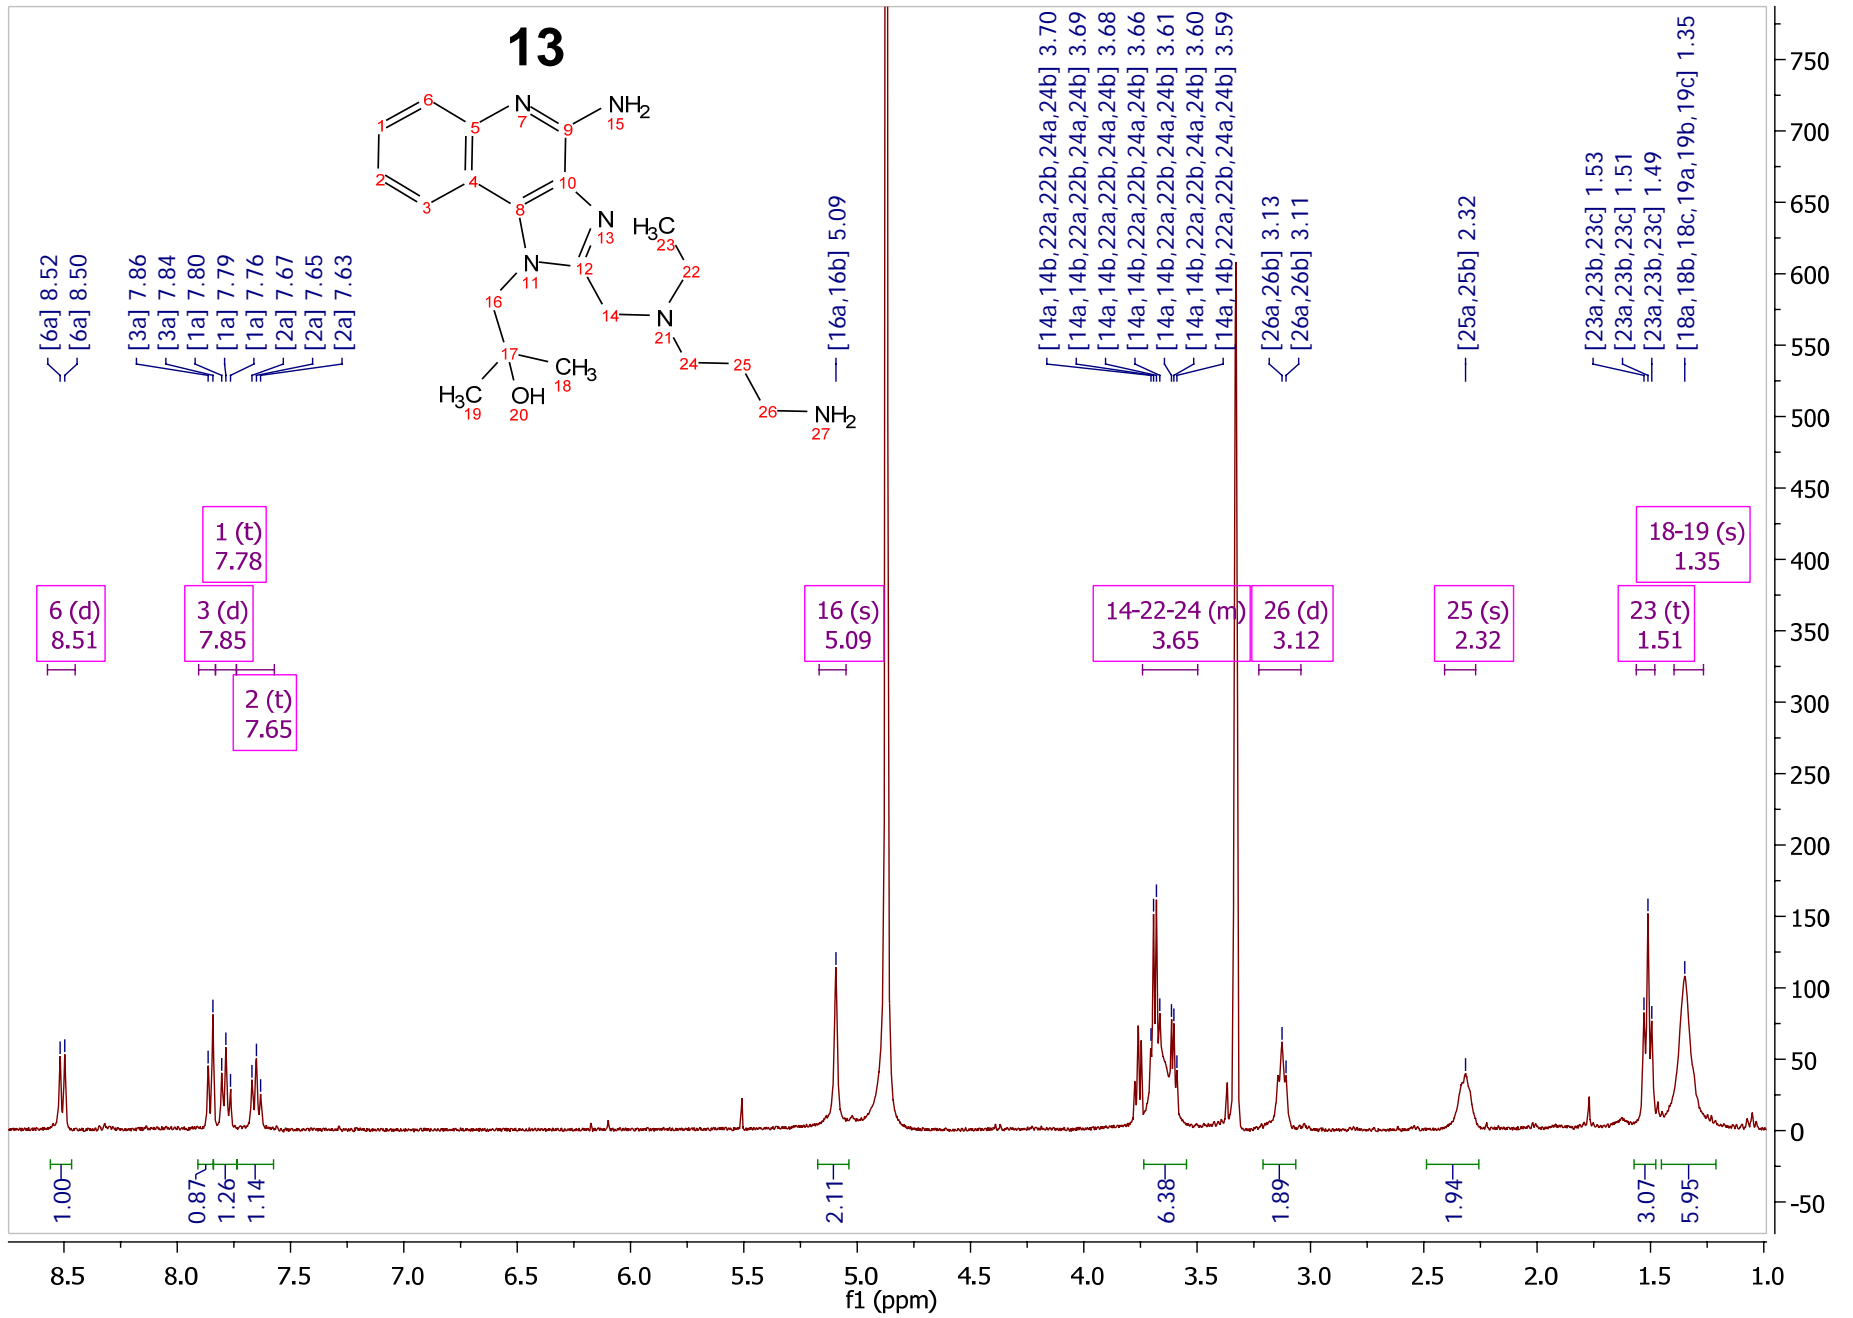



**13**

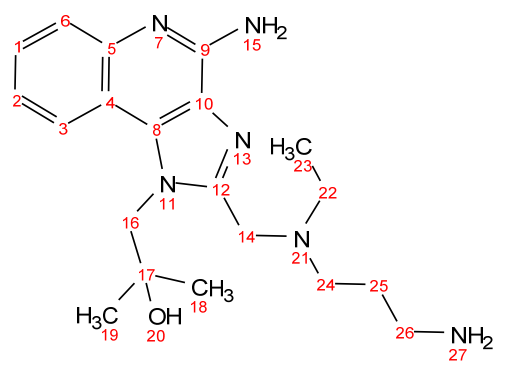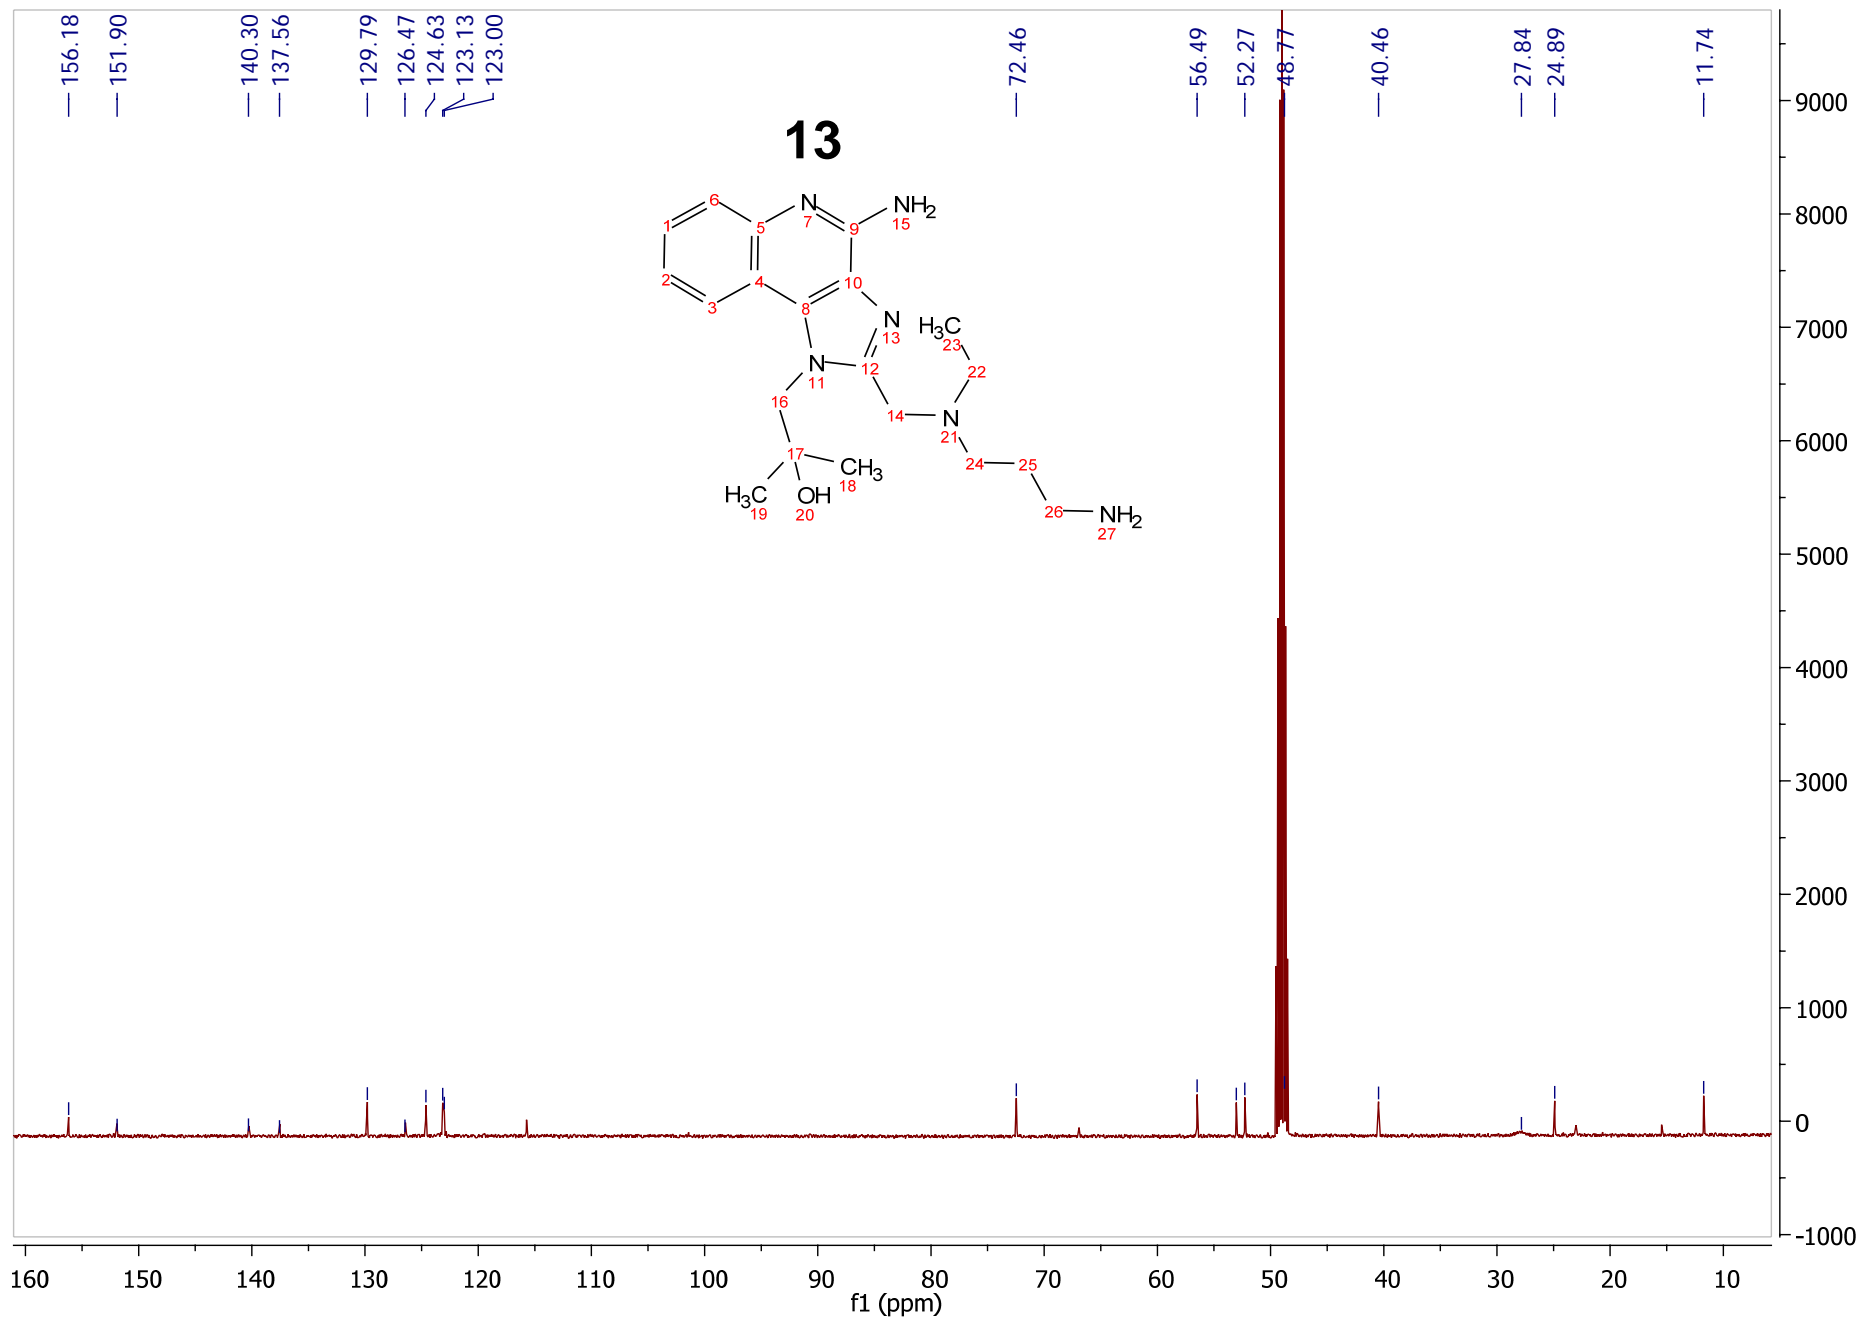

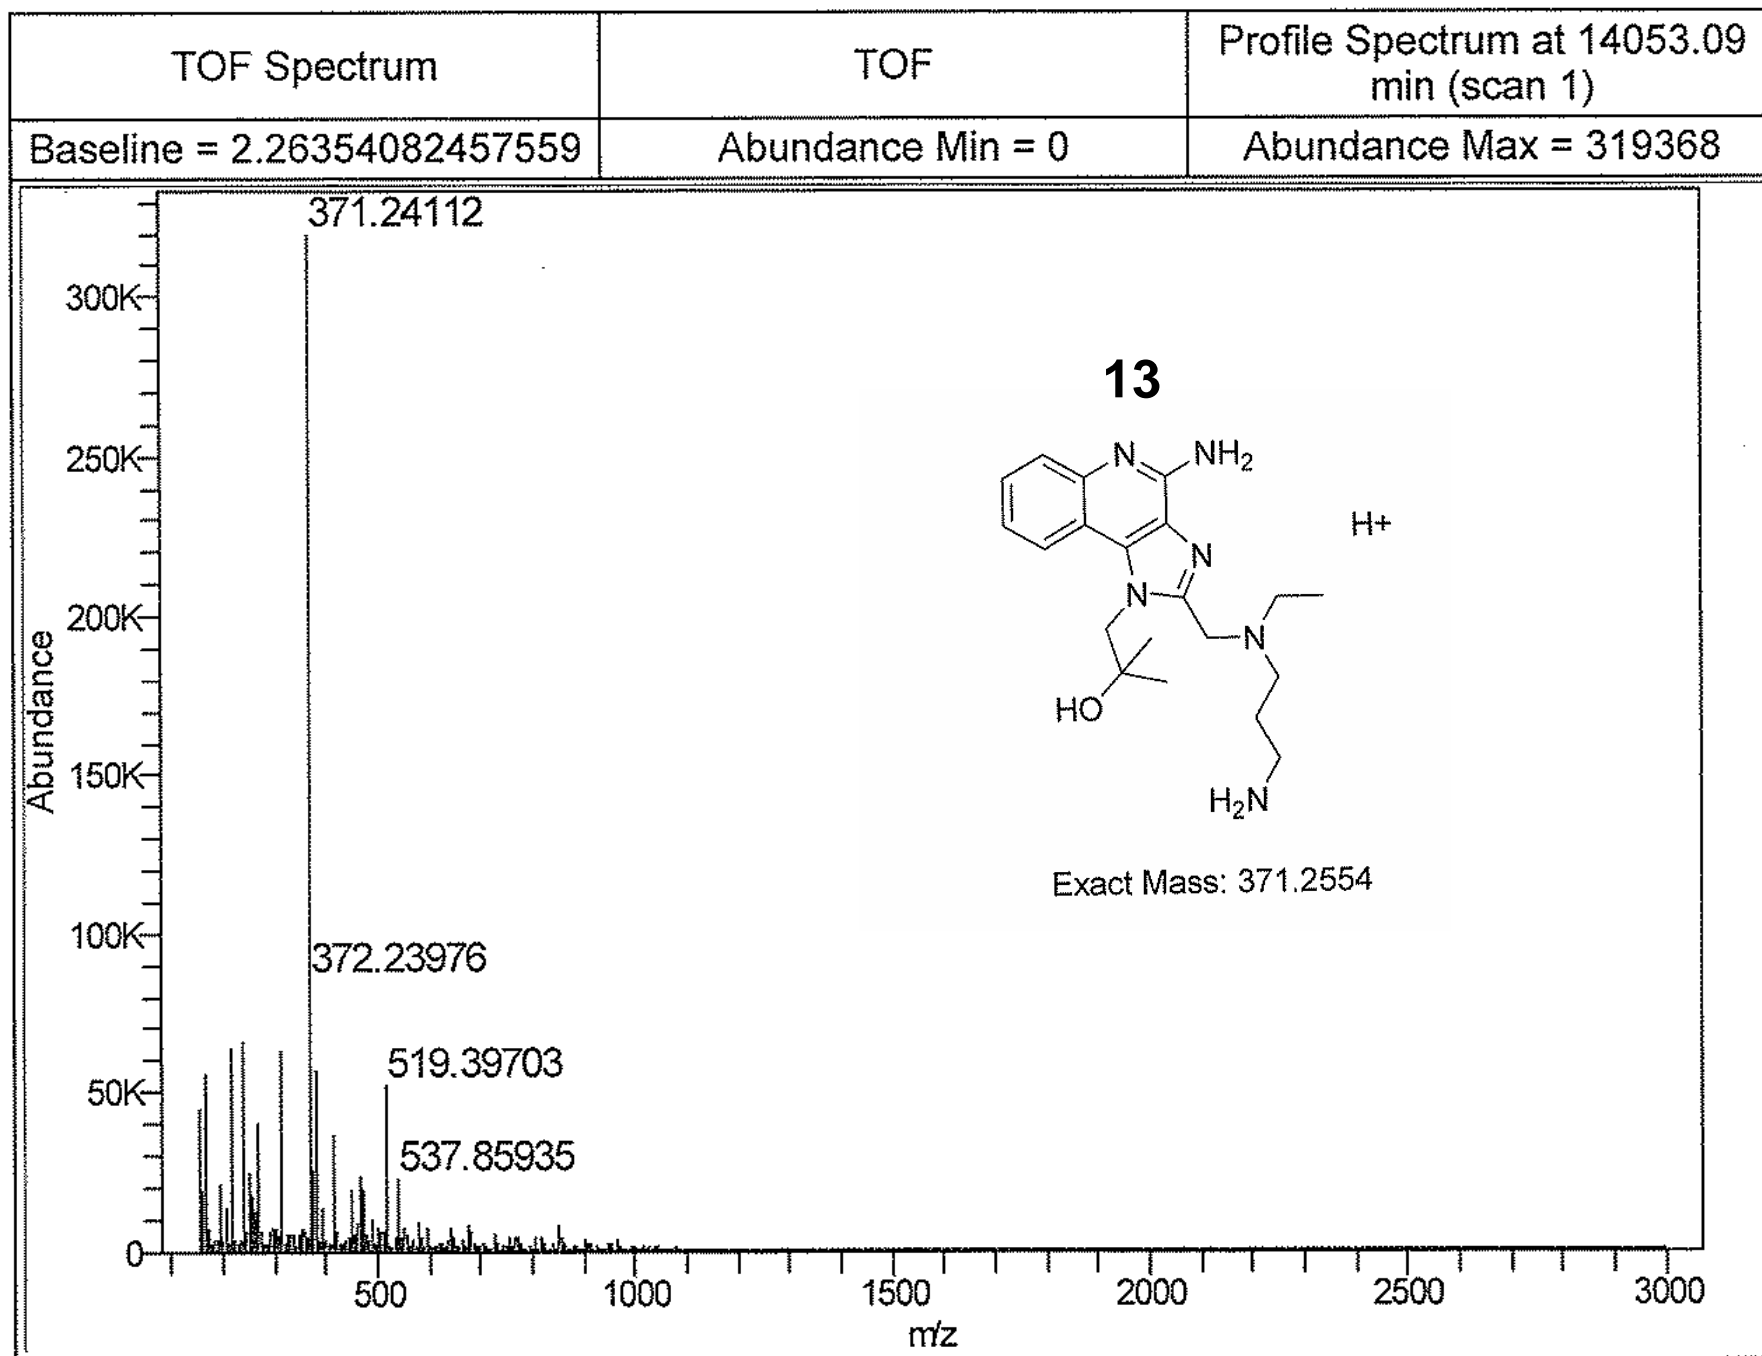

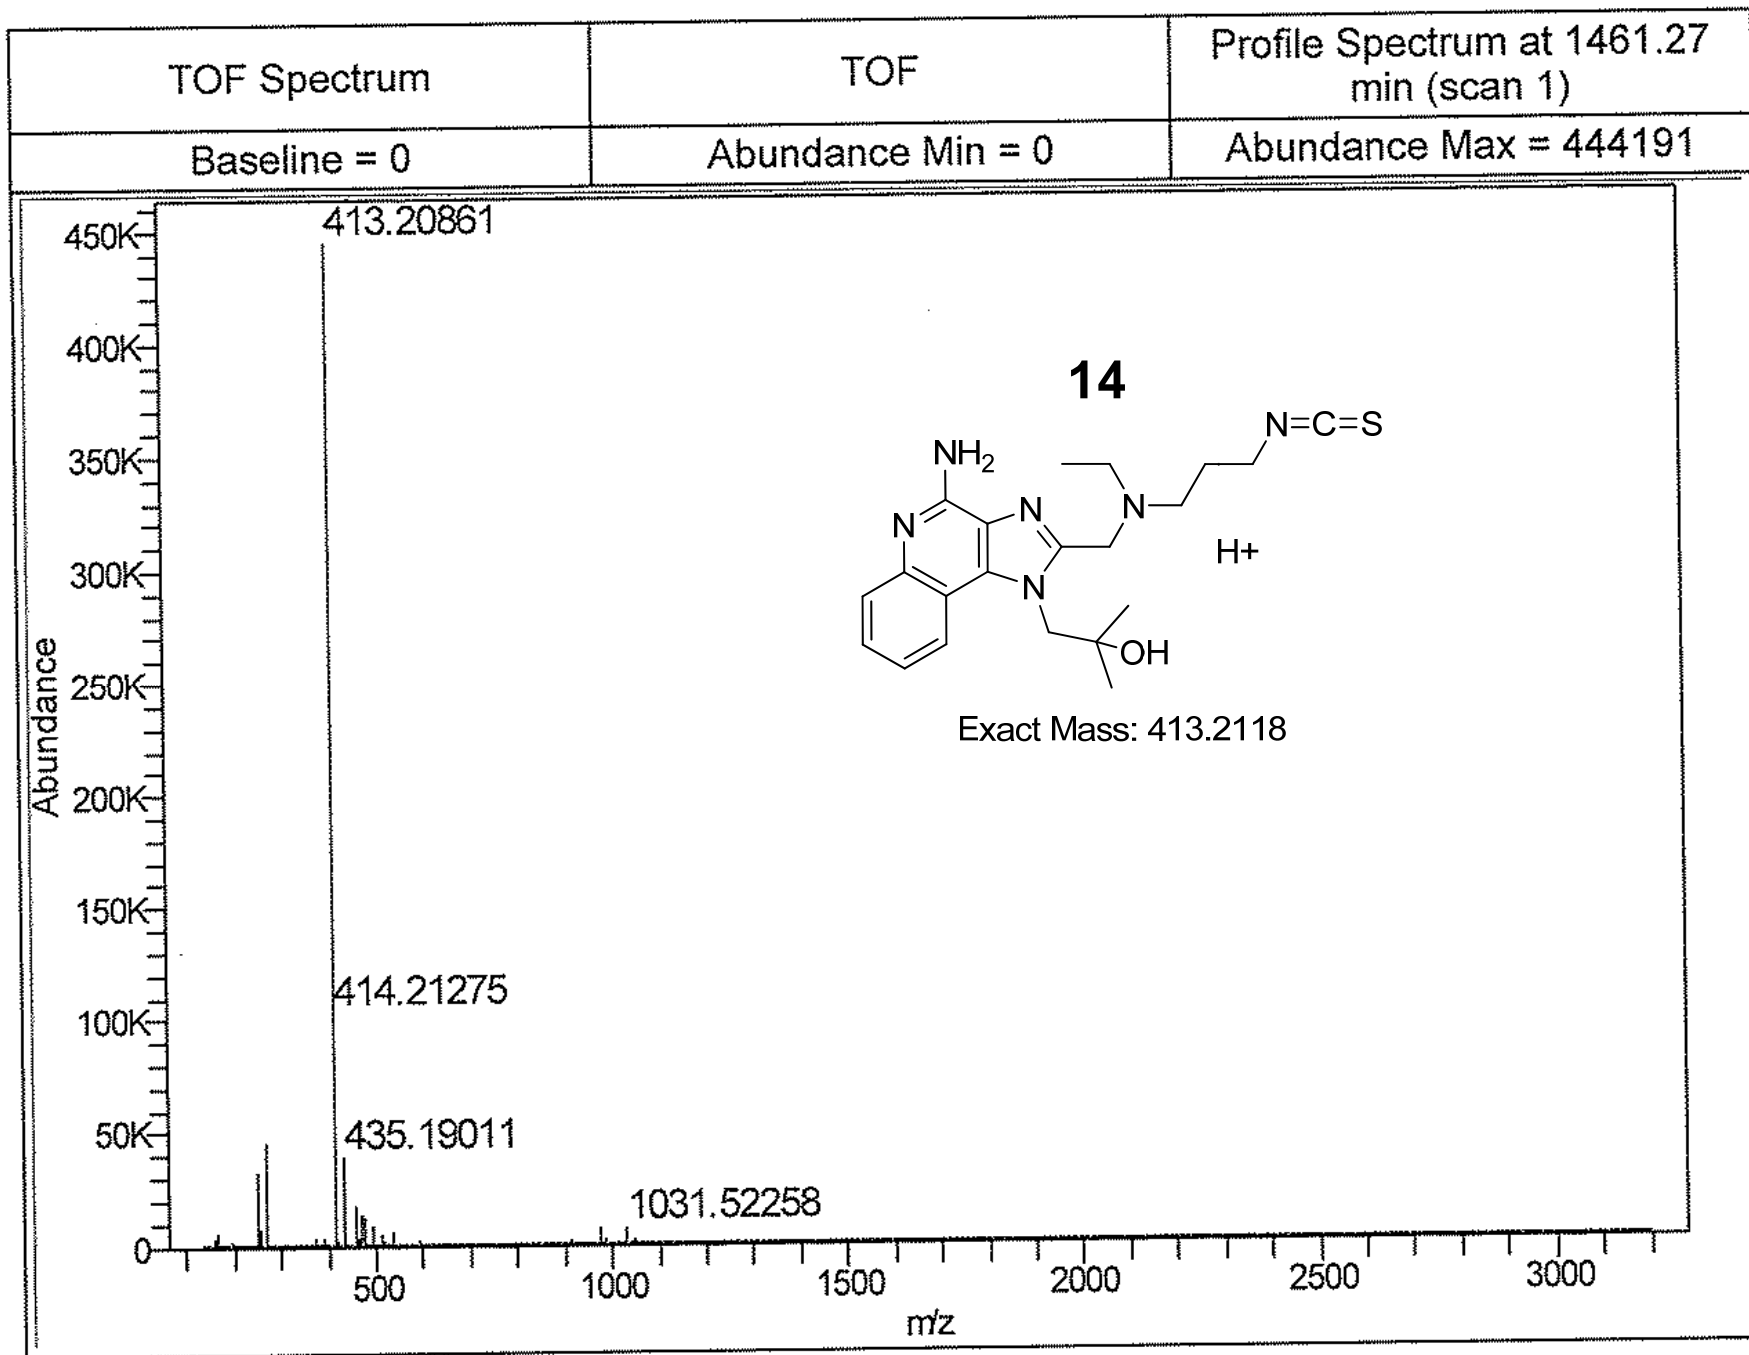

# <sup>1</sup>H Spectrum

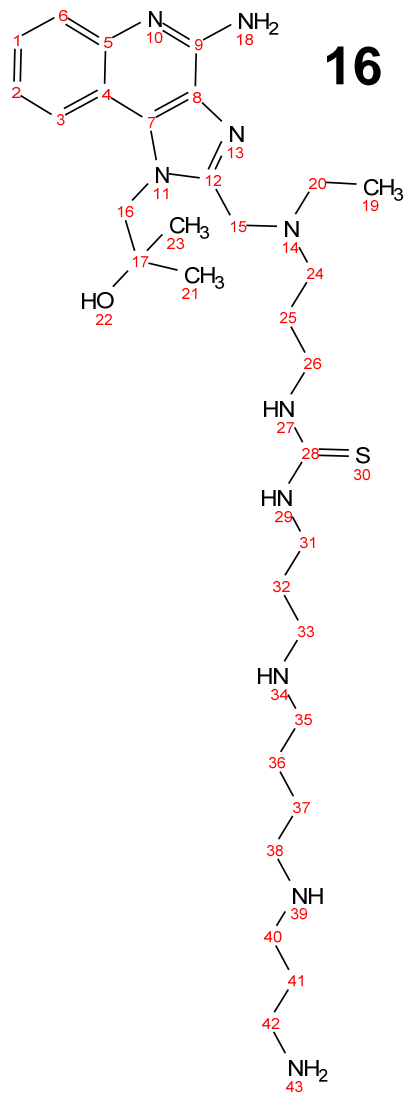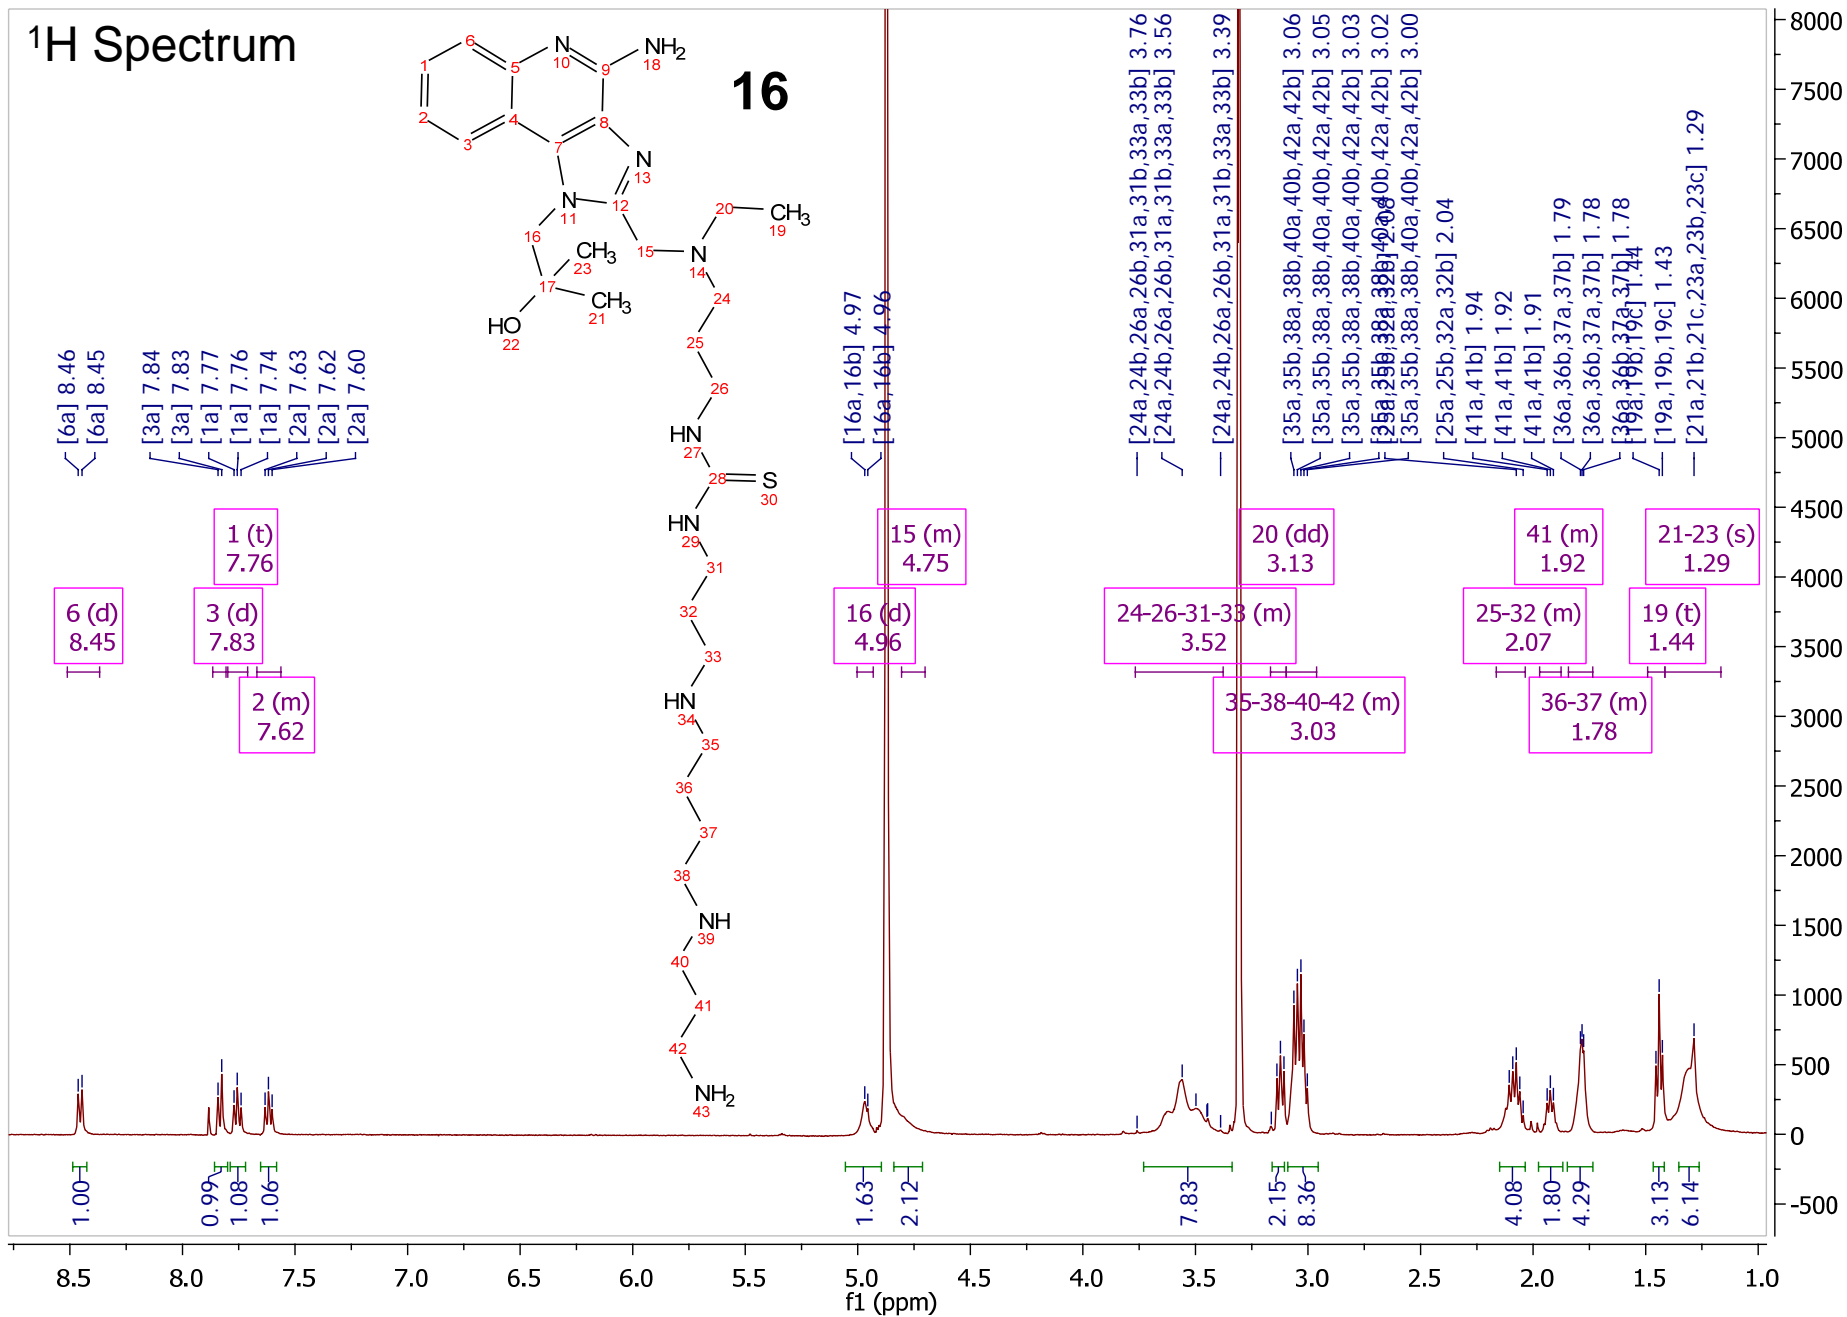

# <sup>13</sup>C Spectrum

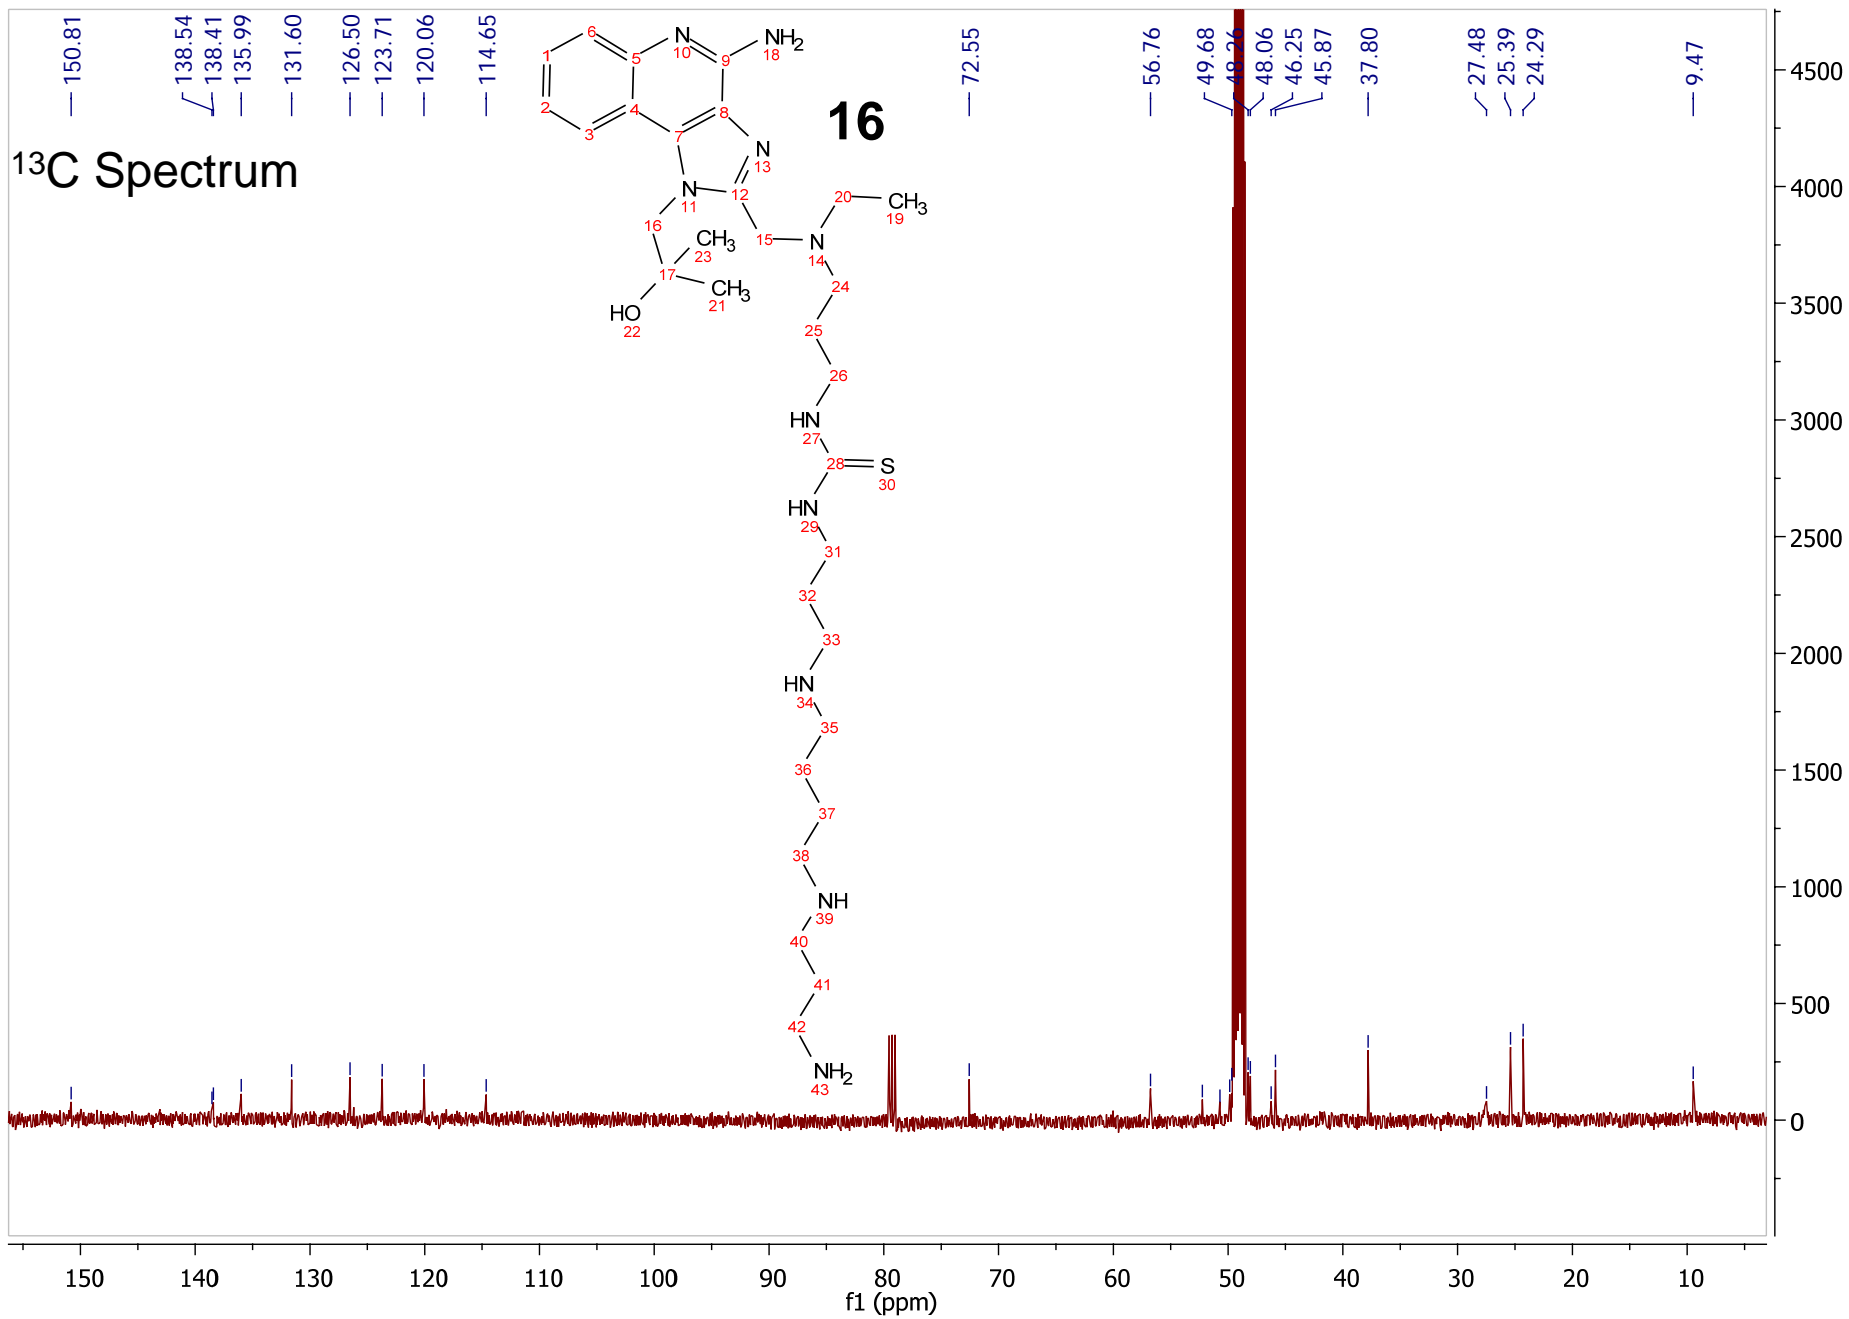



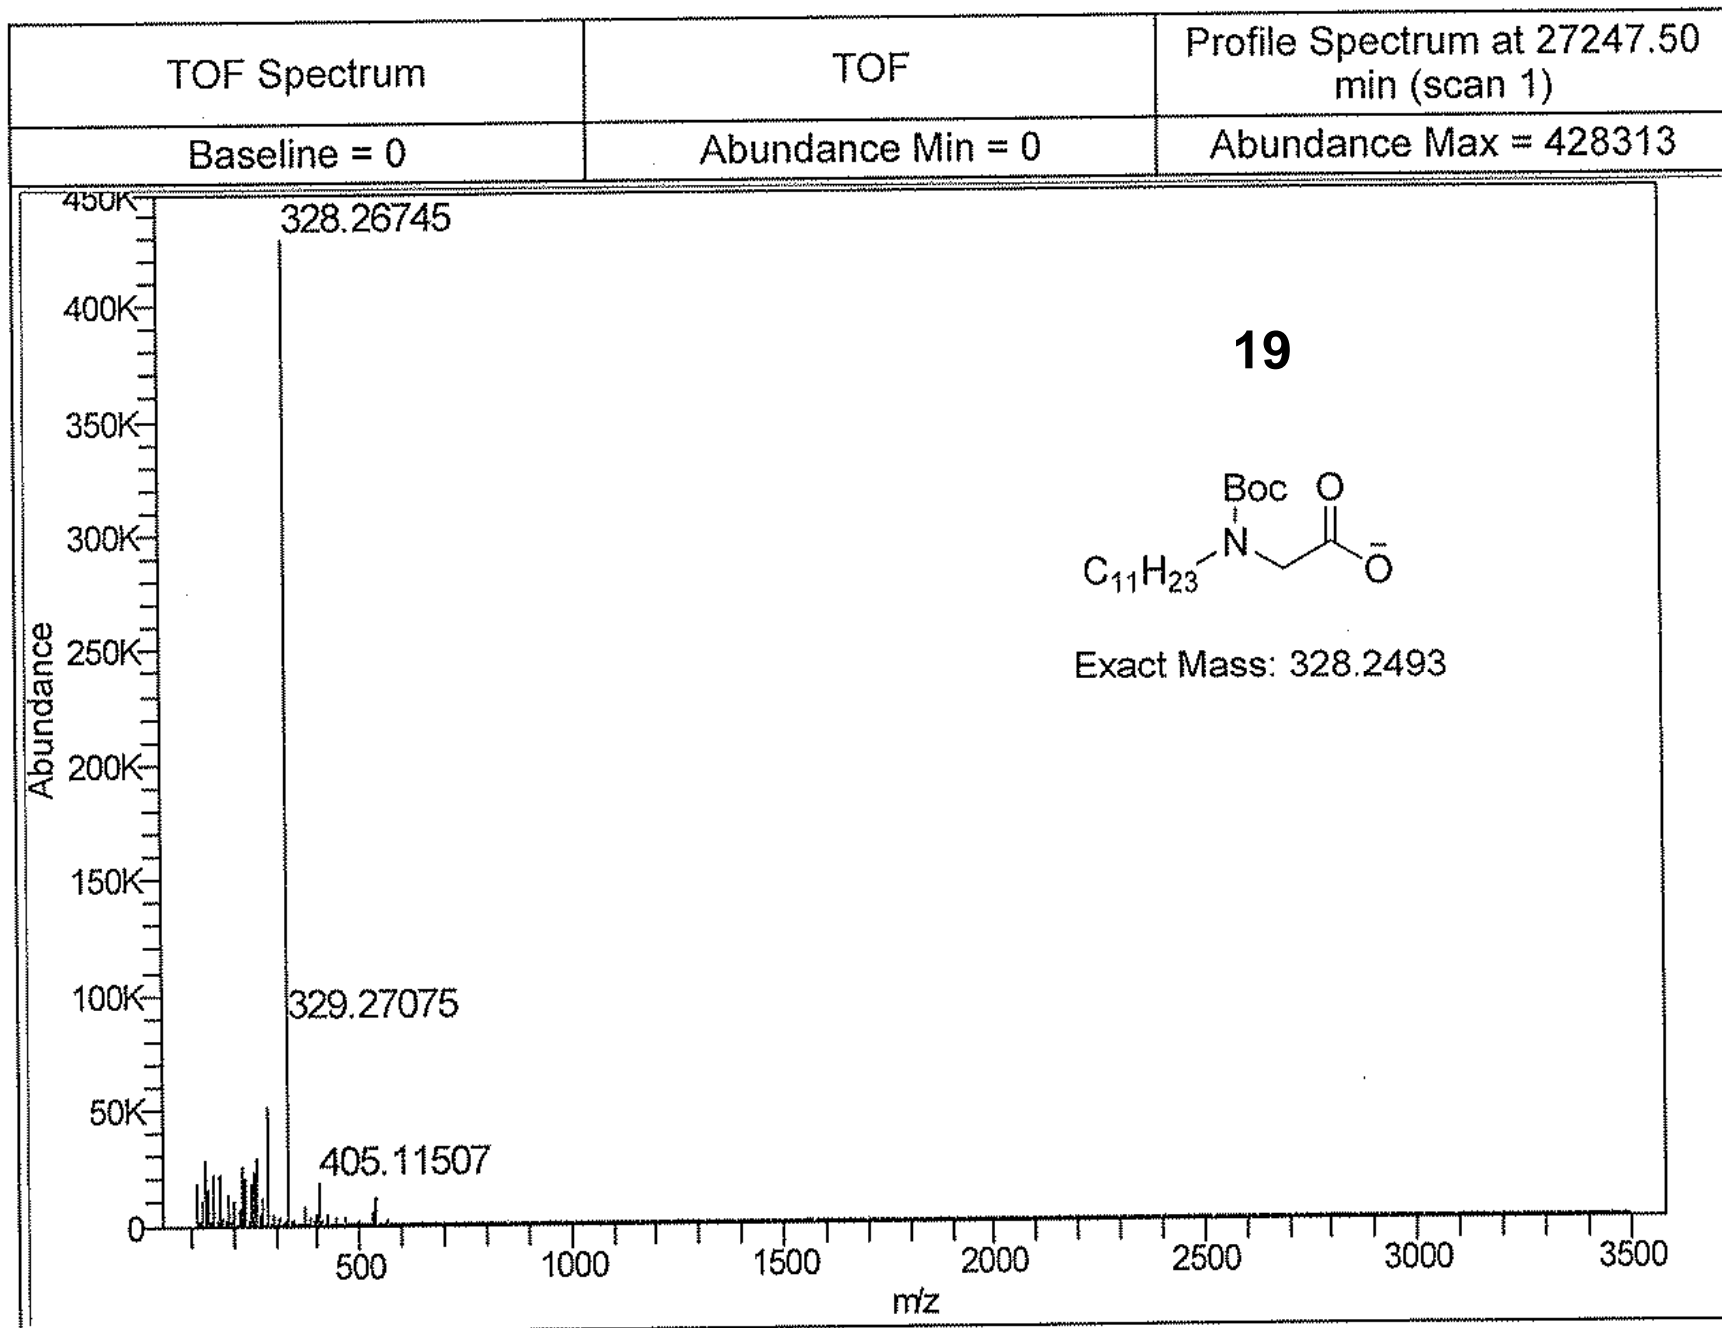

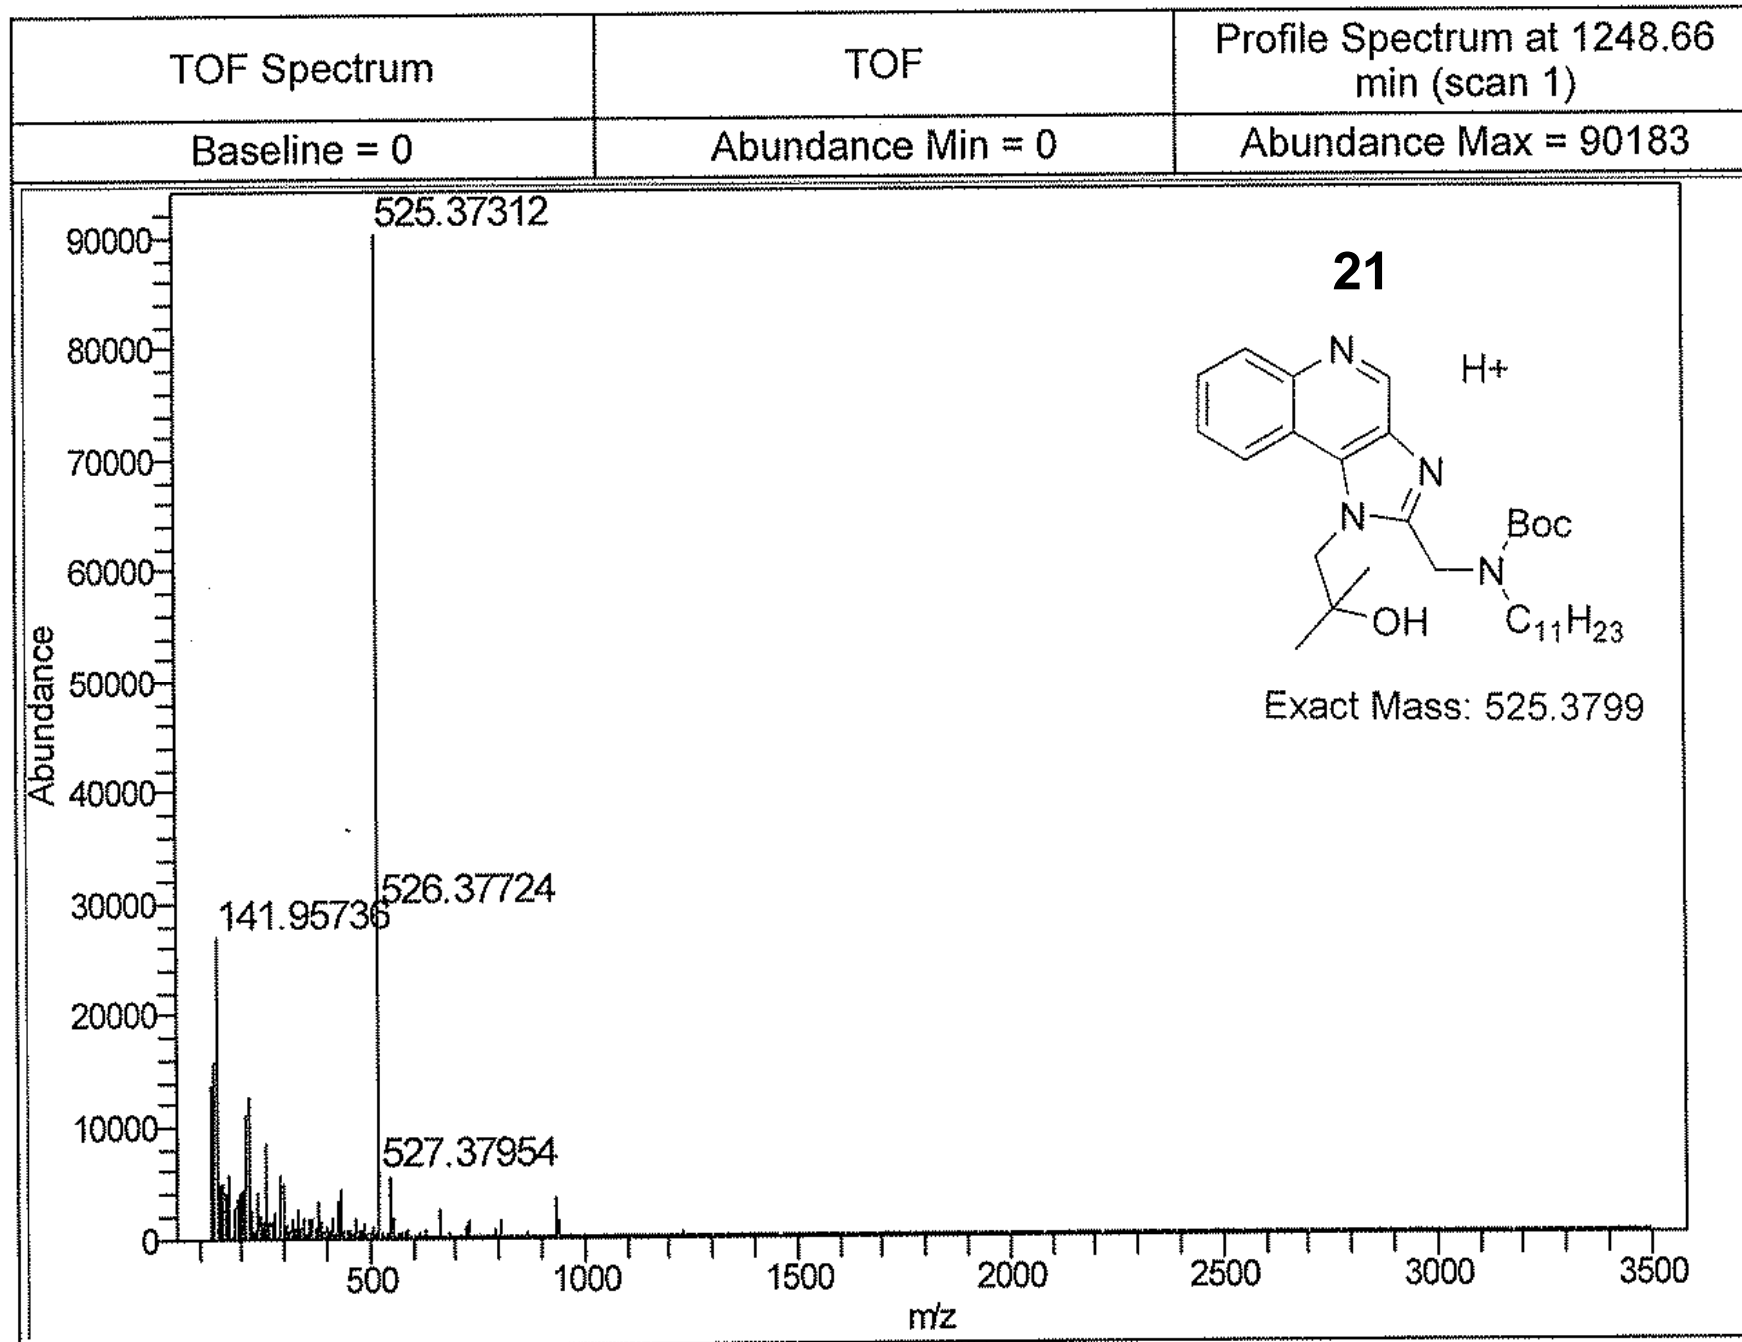



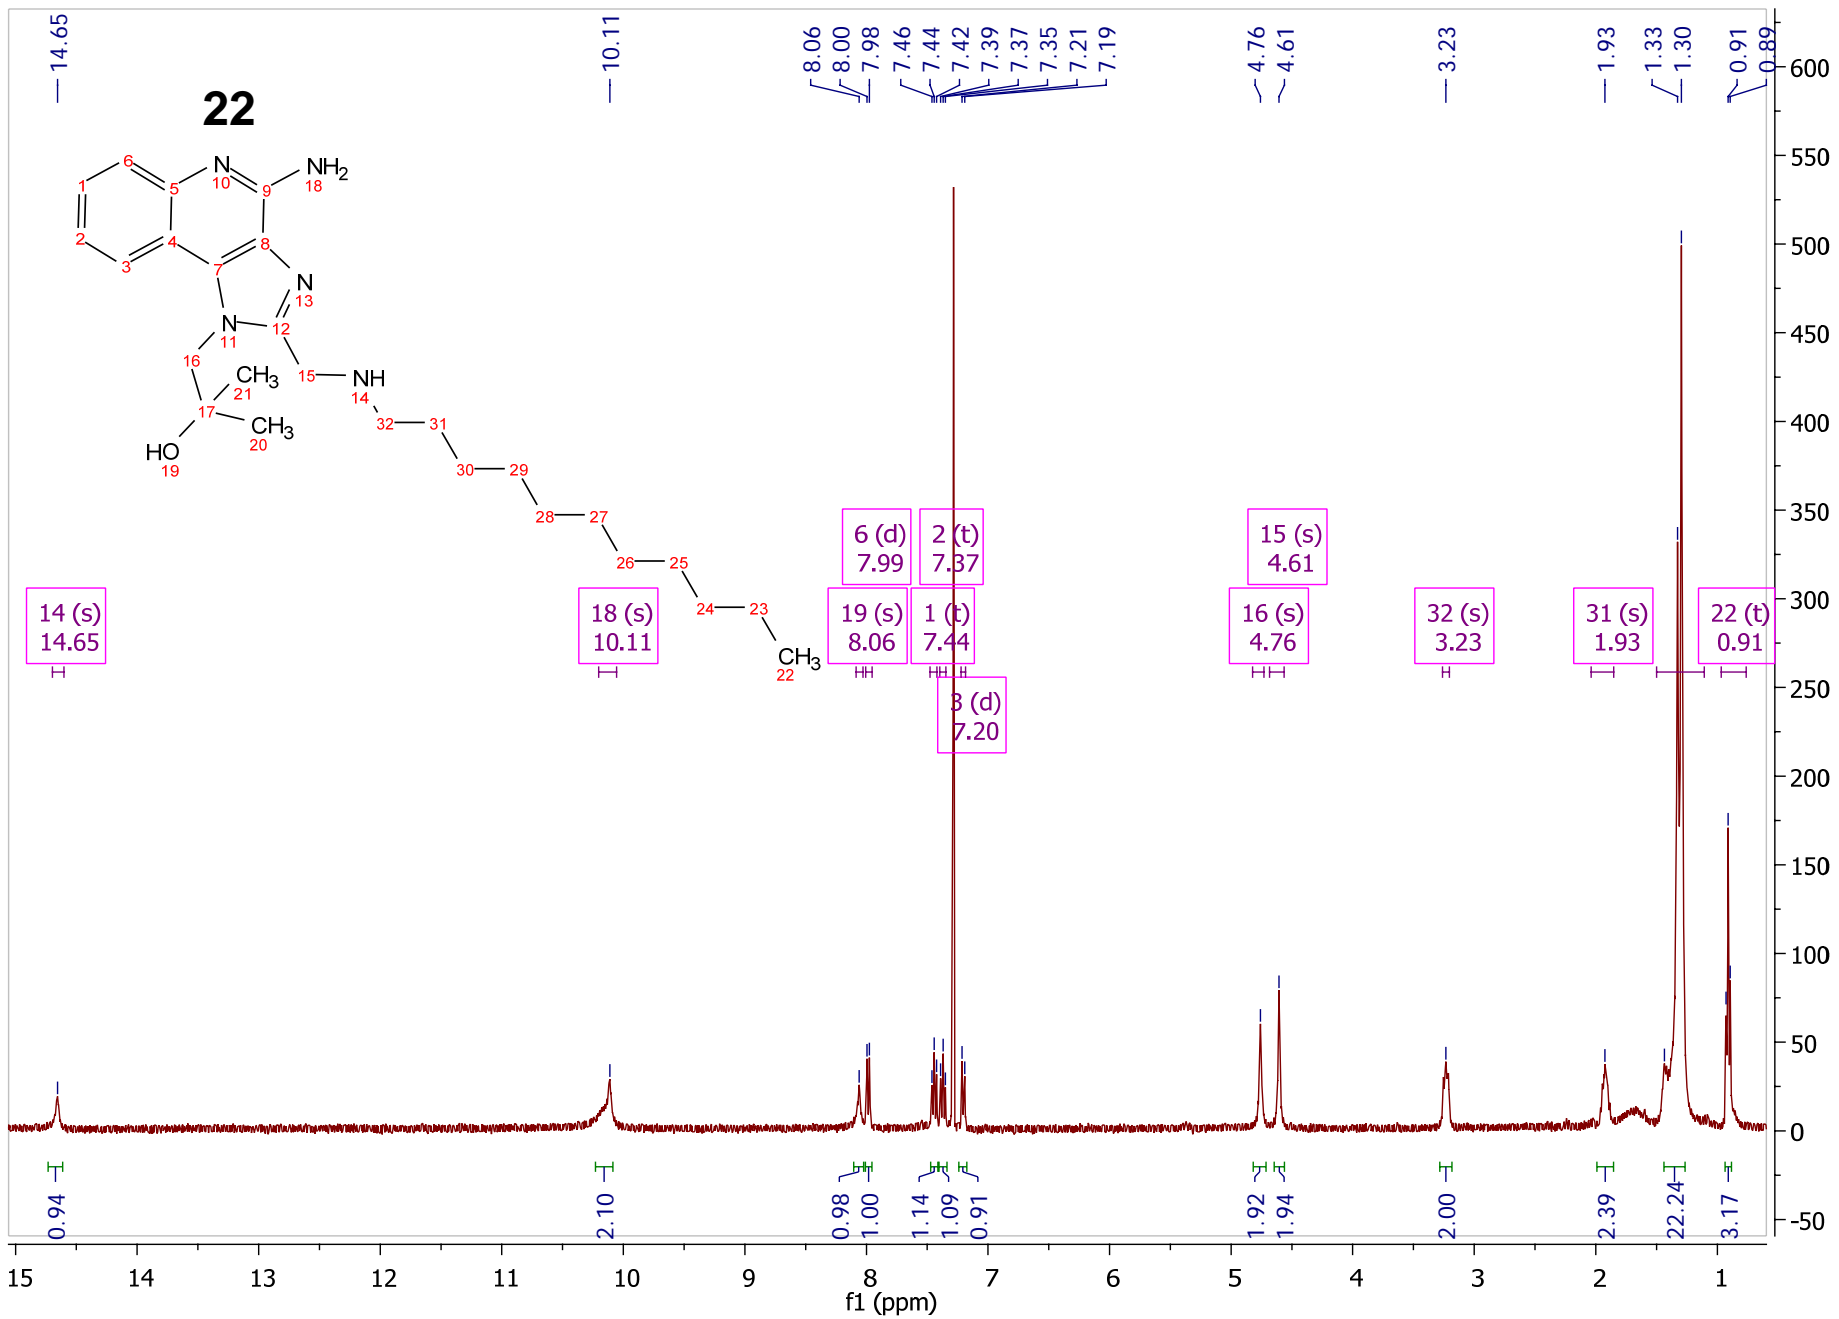

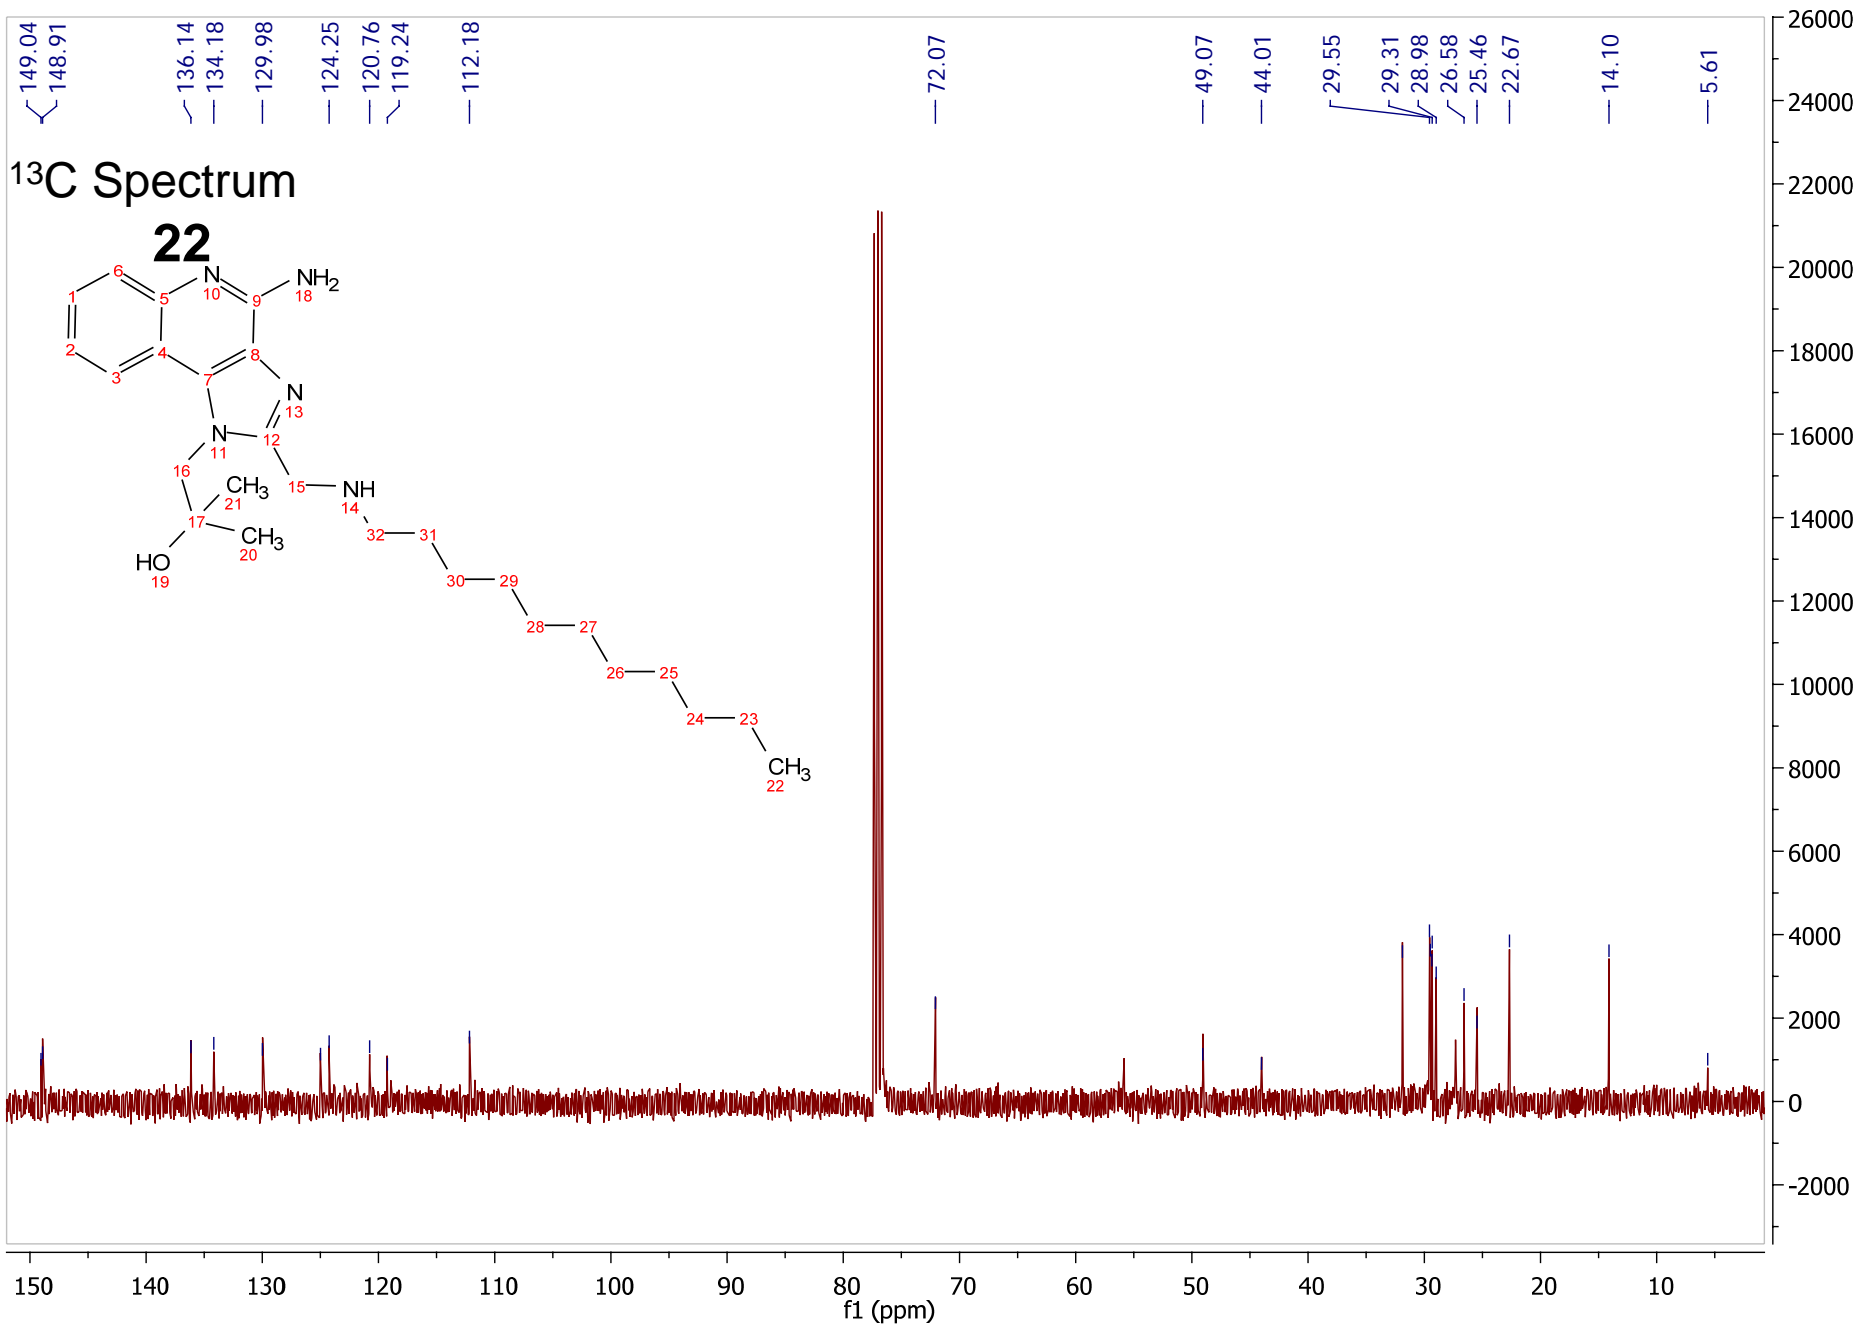

|              |                   |                                          |
|--------------|-------------------|------------------------------------------|
| TOF Spectrum | TOF               | Profile Spectrum at 1454.44 min (scan 1) |
| Baseline = 0 | Abundance Min = 0 | Abundance Max = 282837                   |

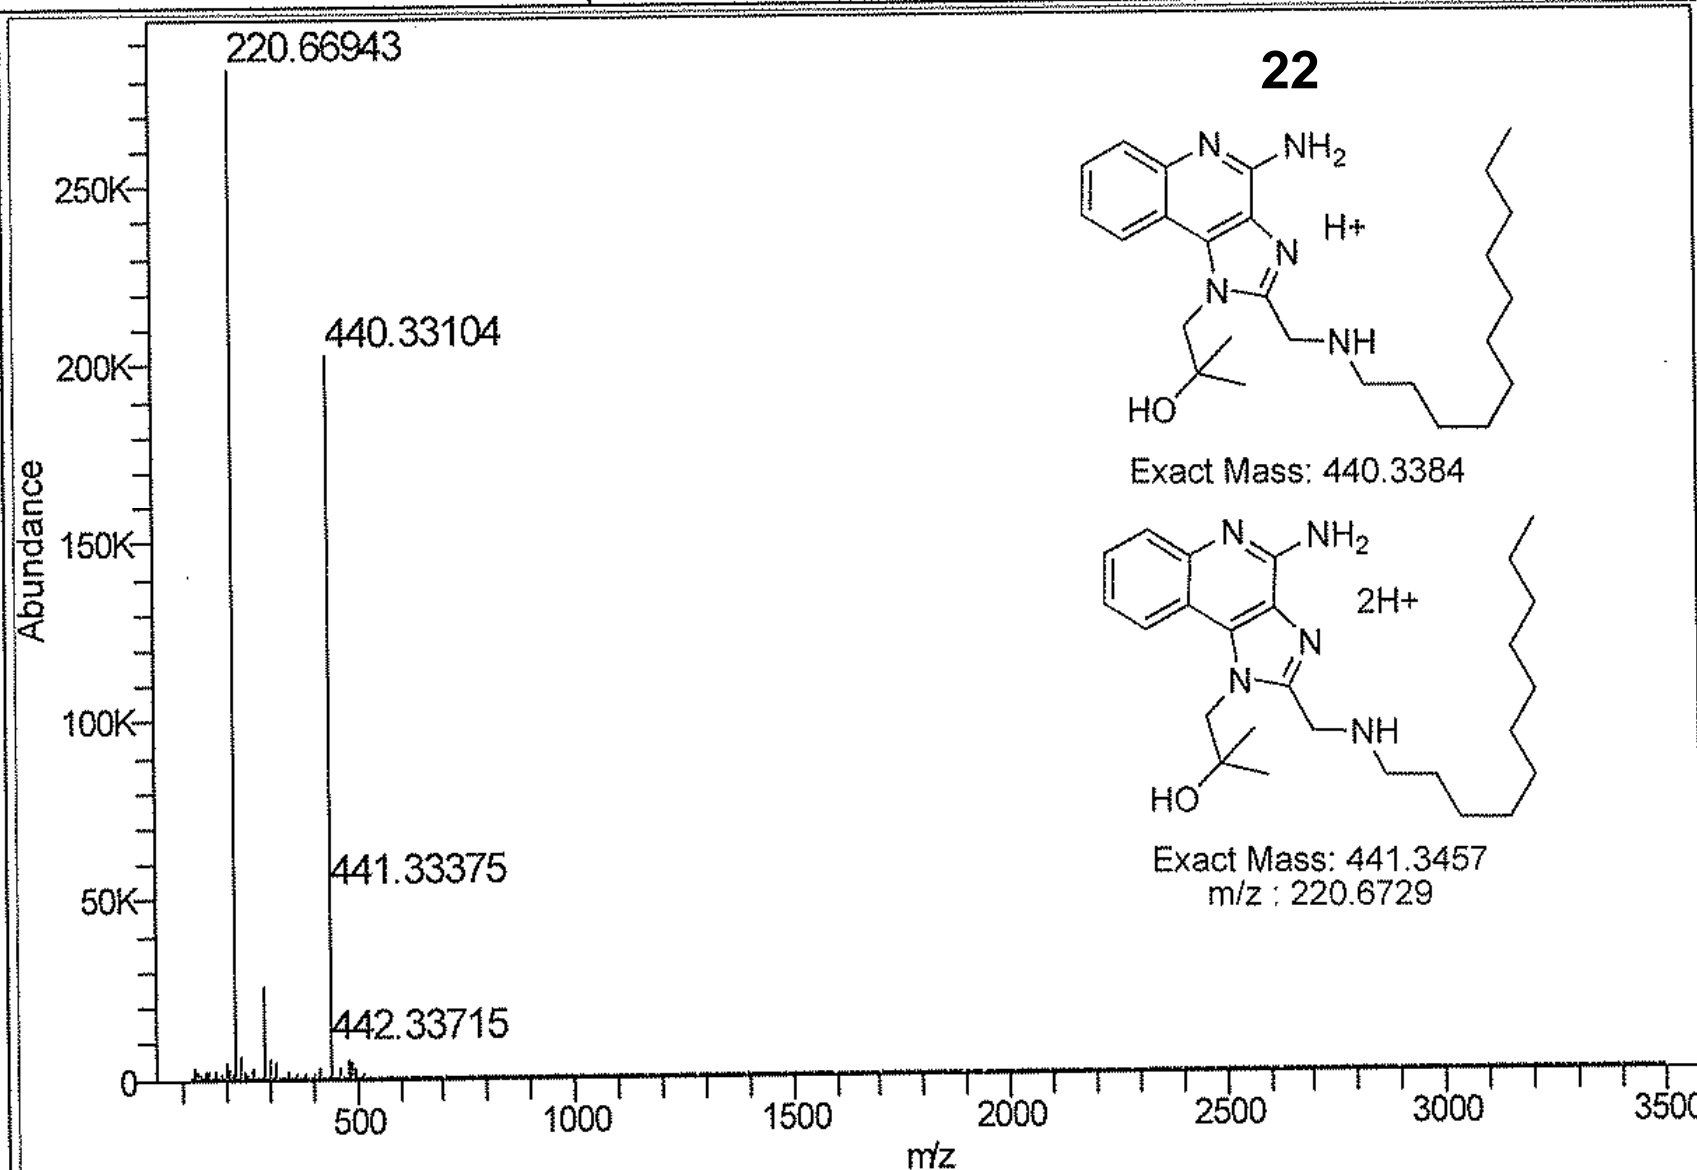

# <sup>1</sup>H Spectrum

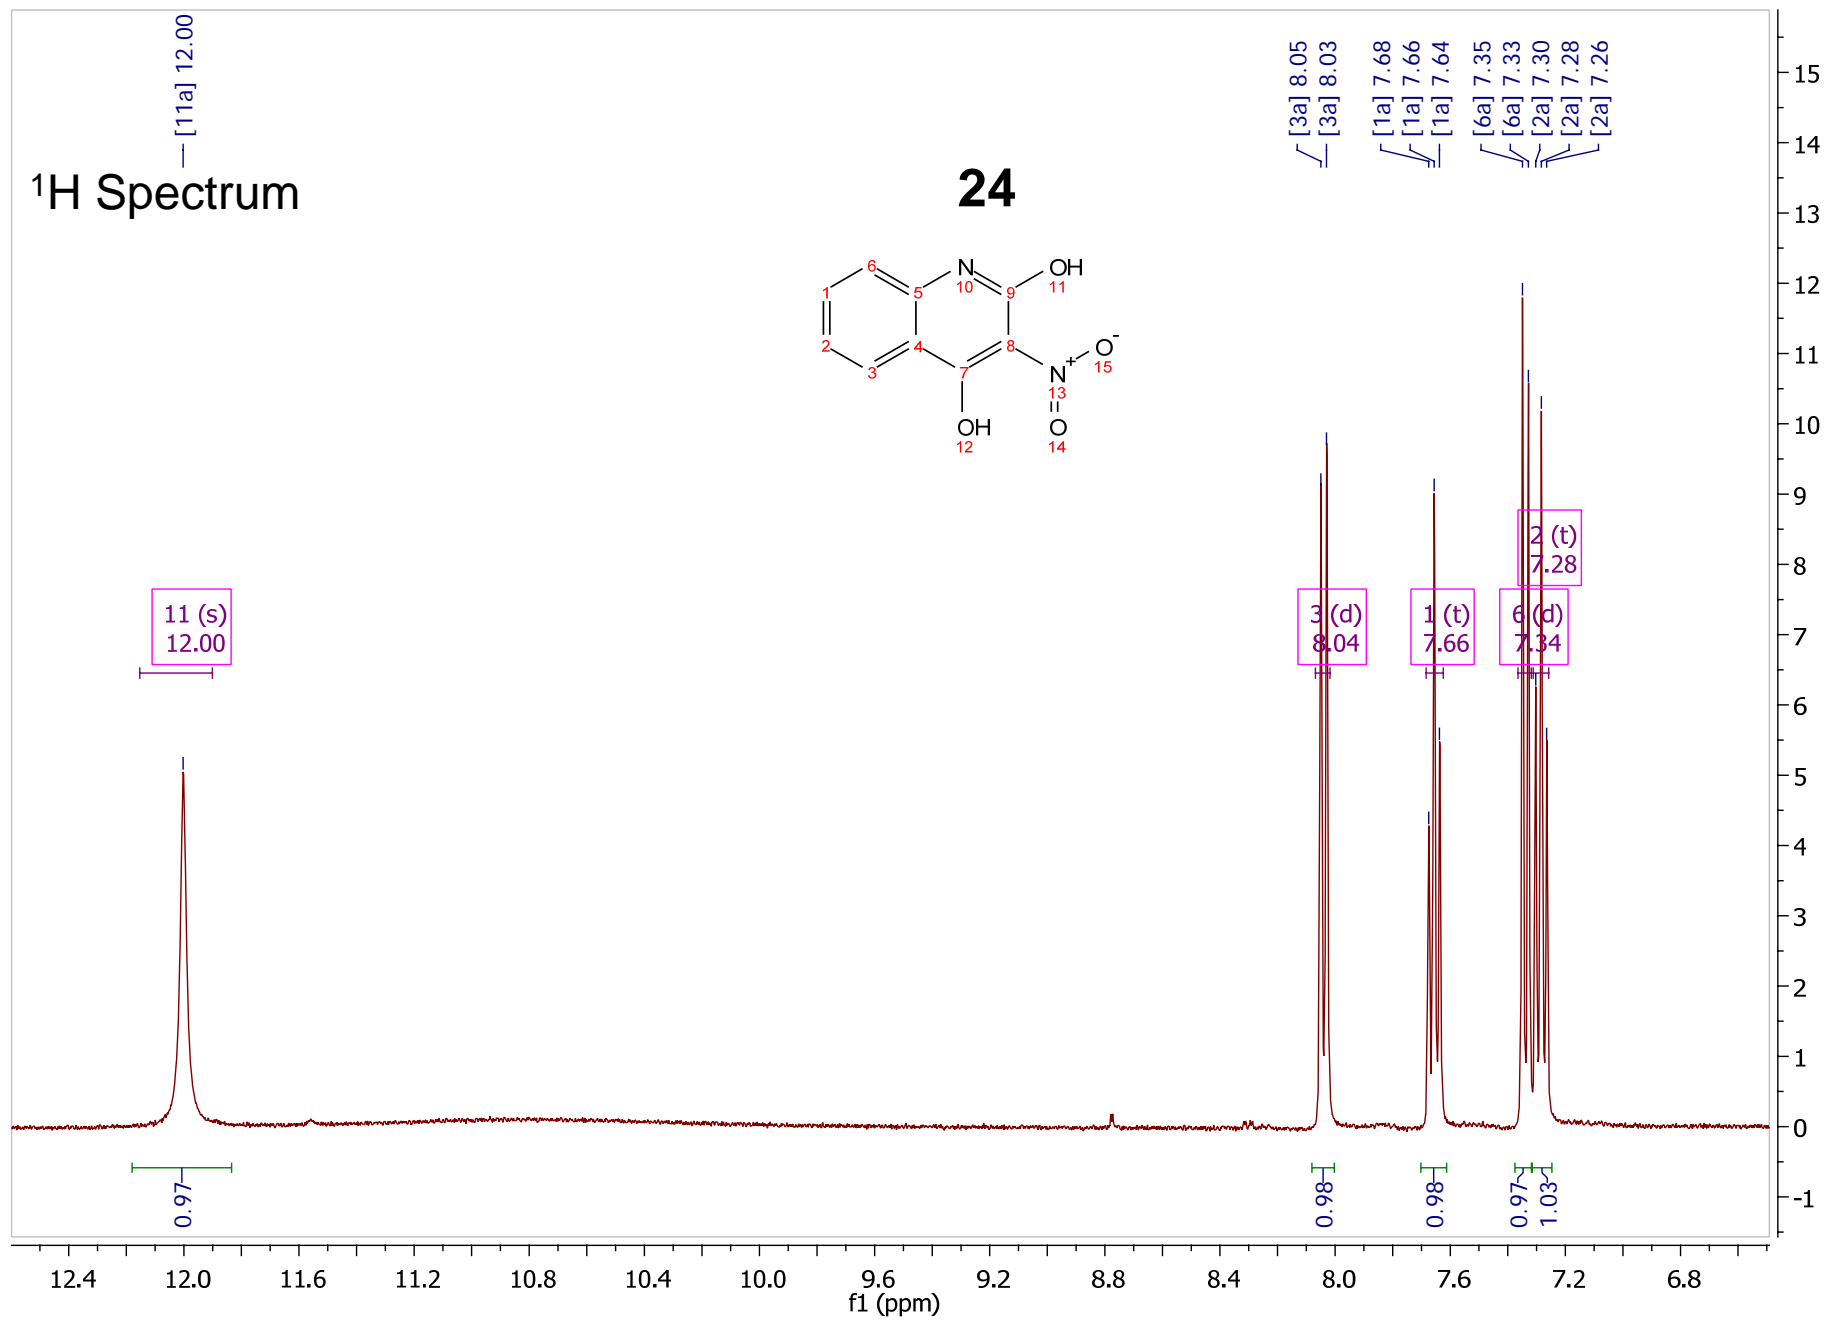

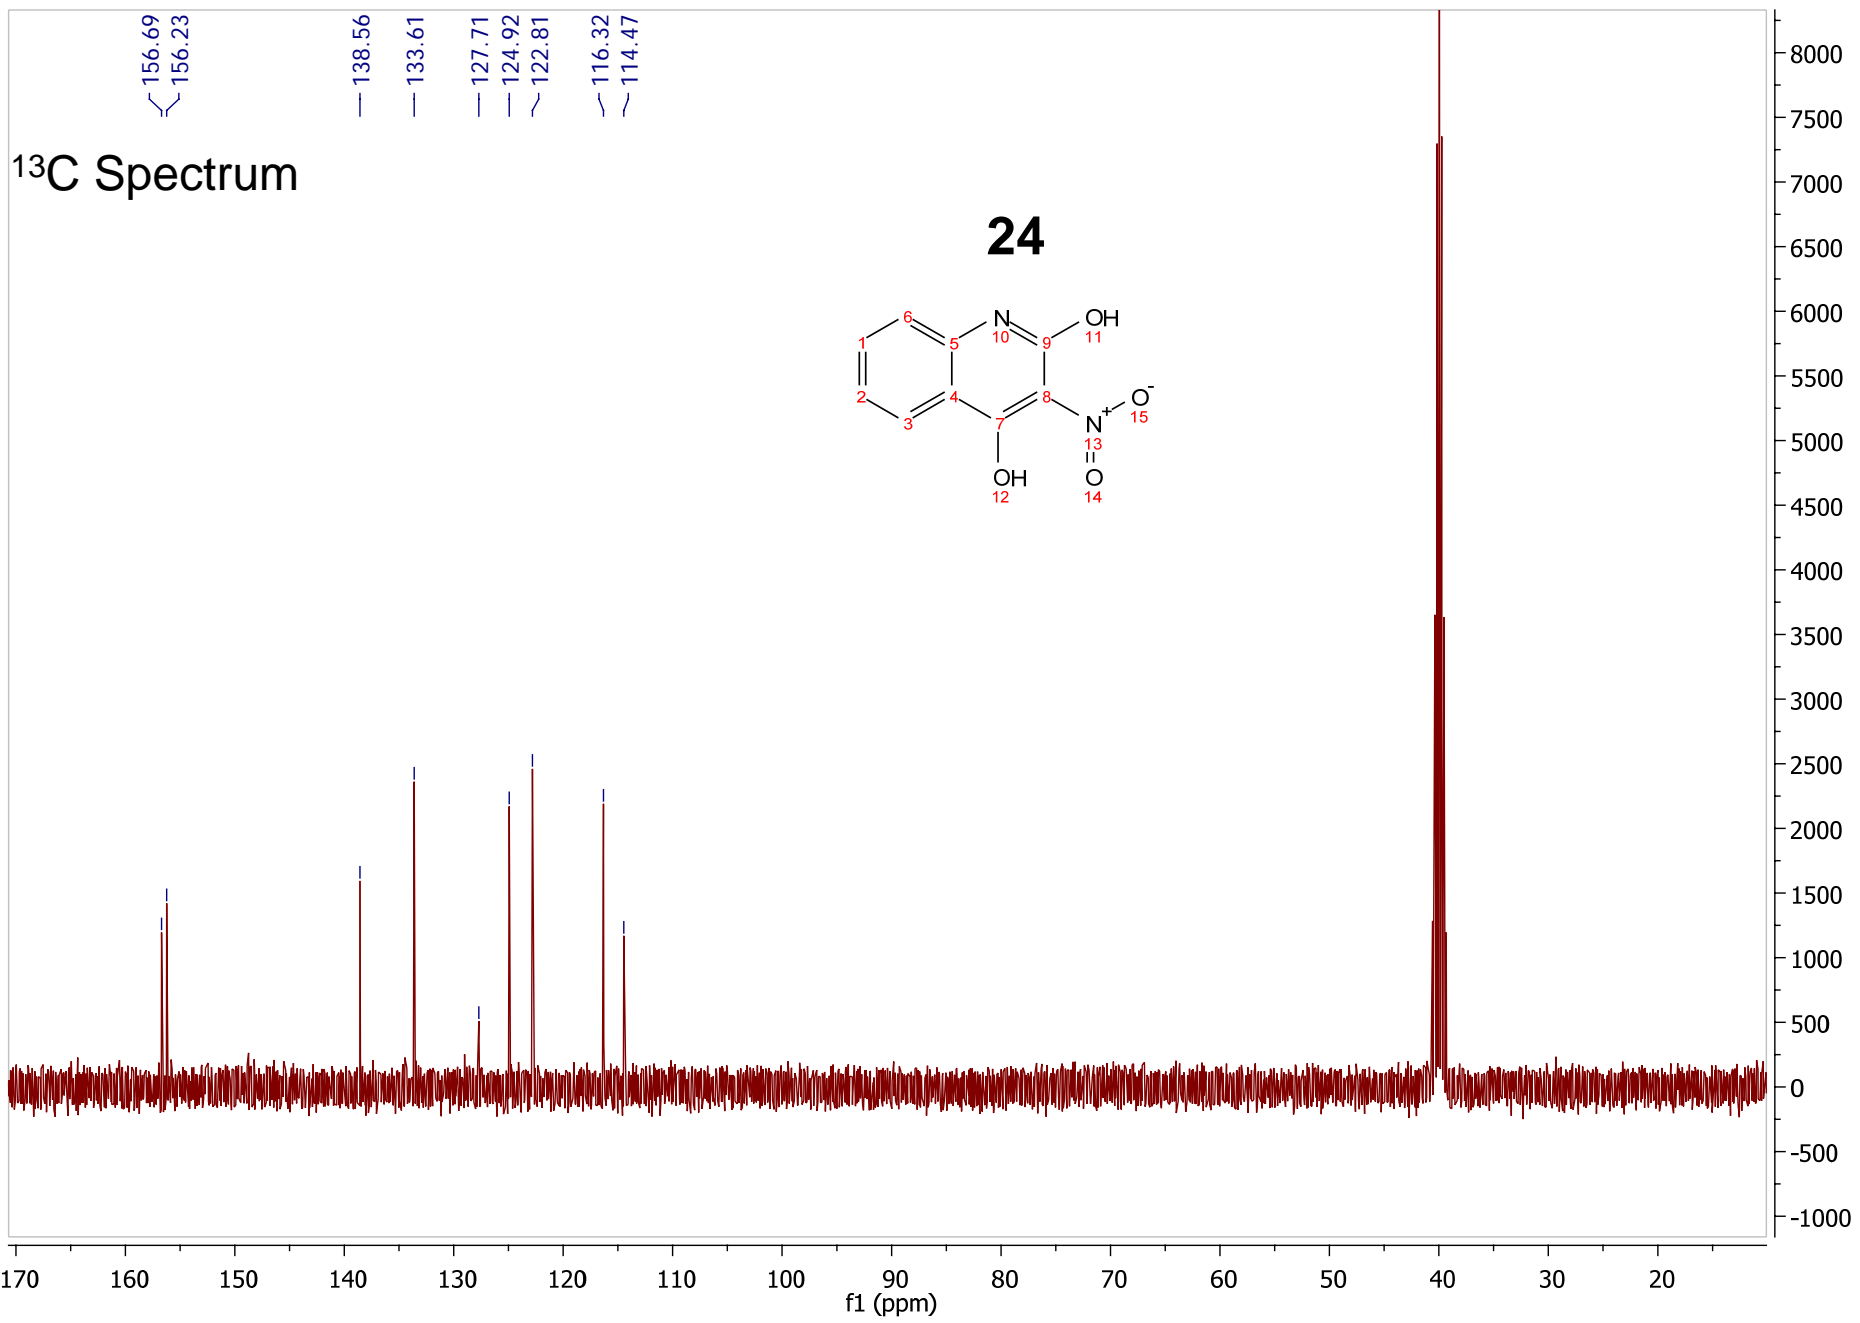

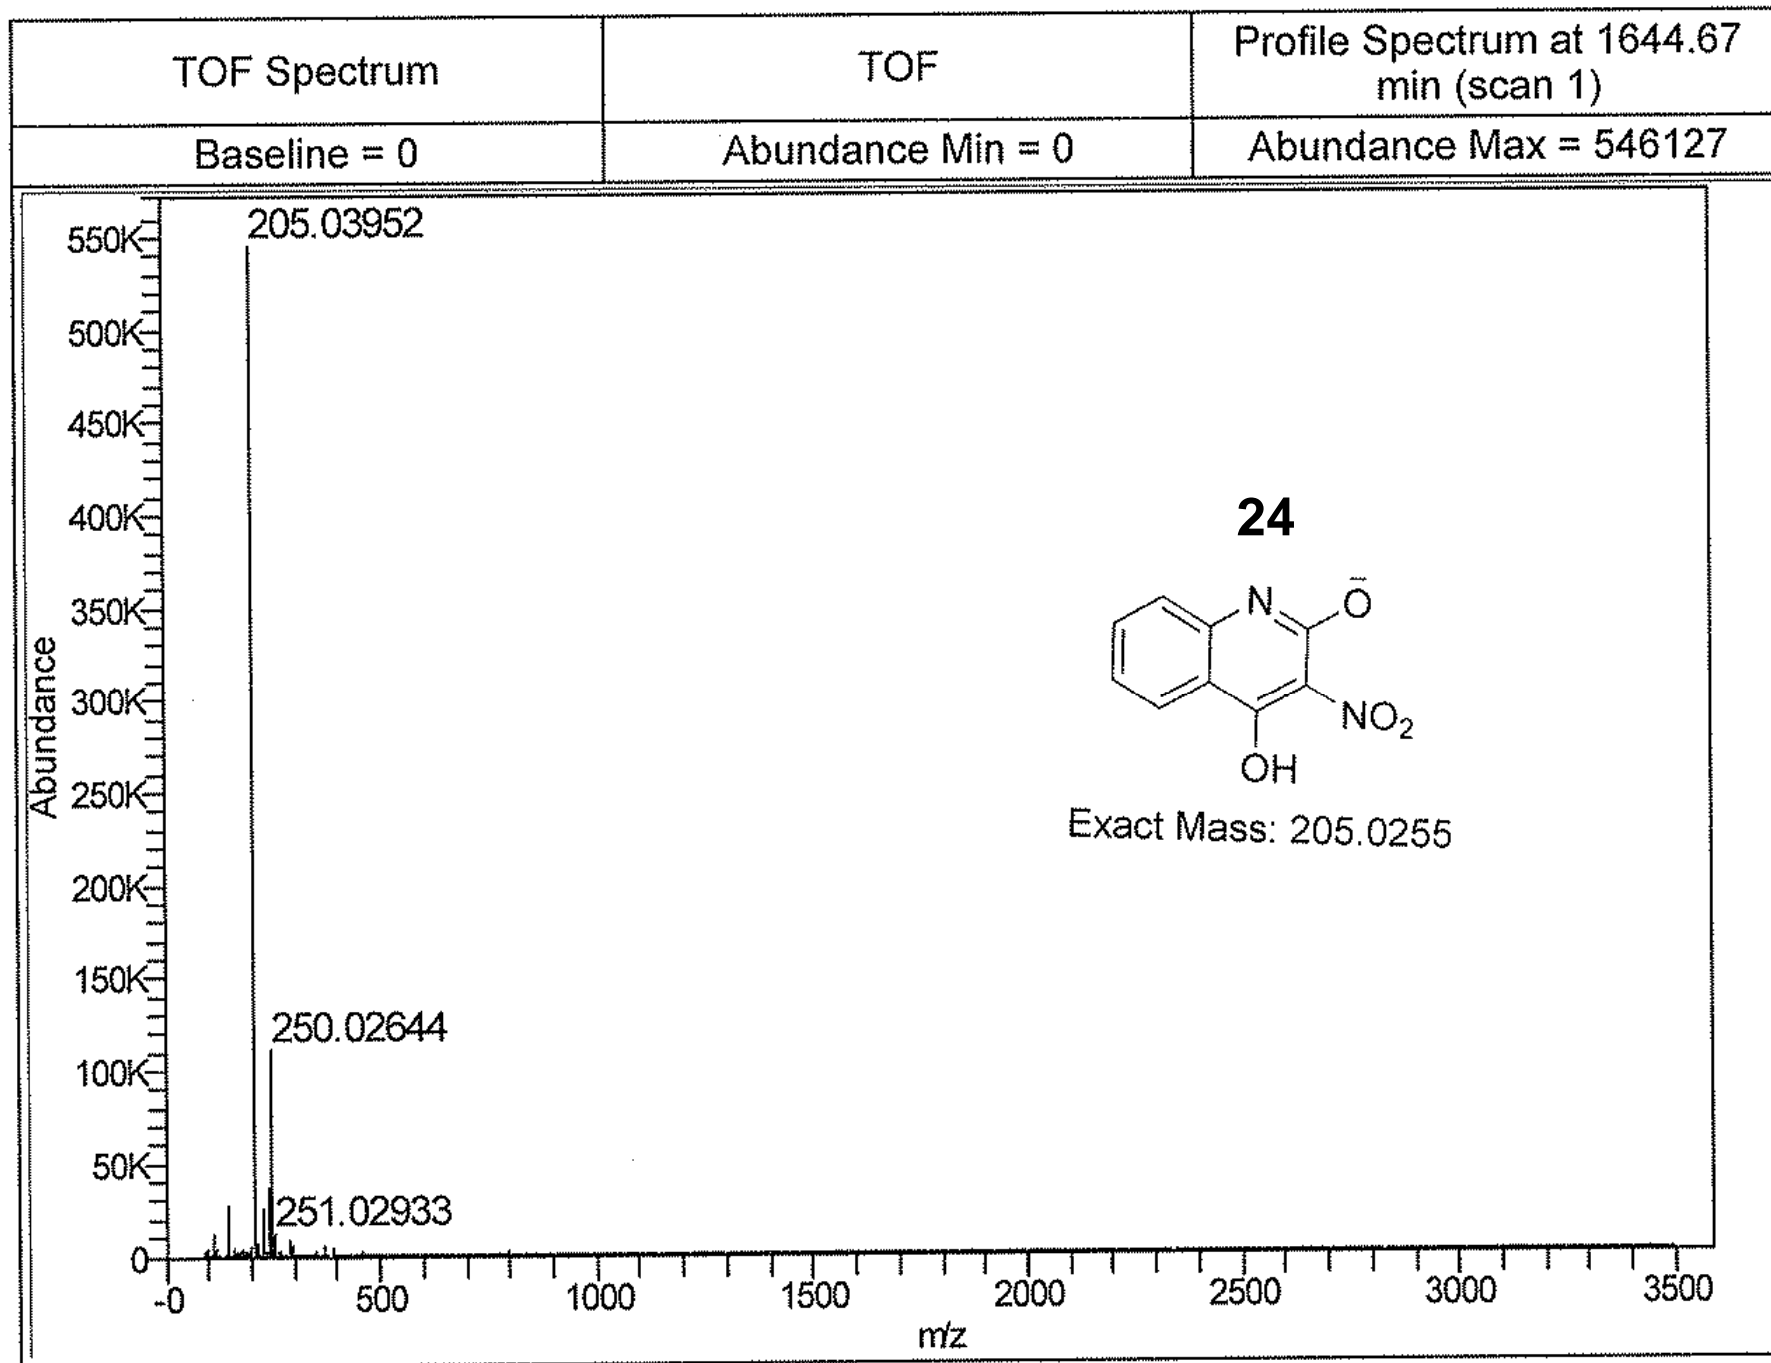

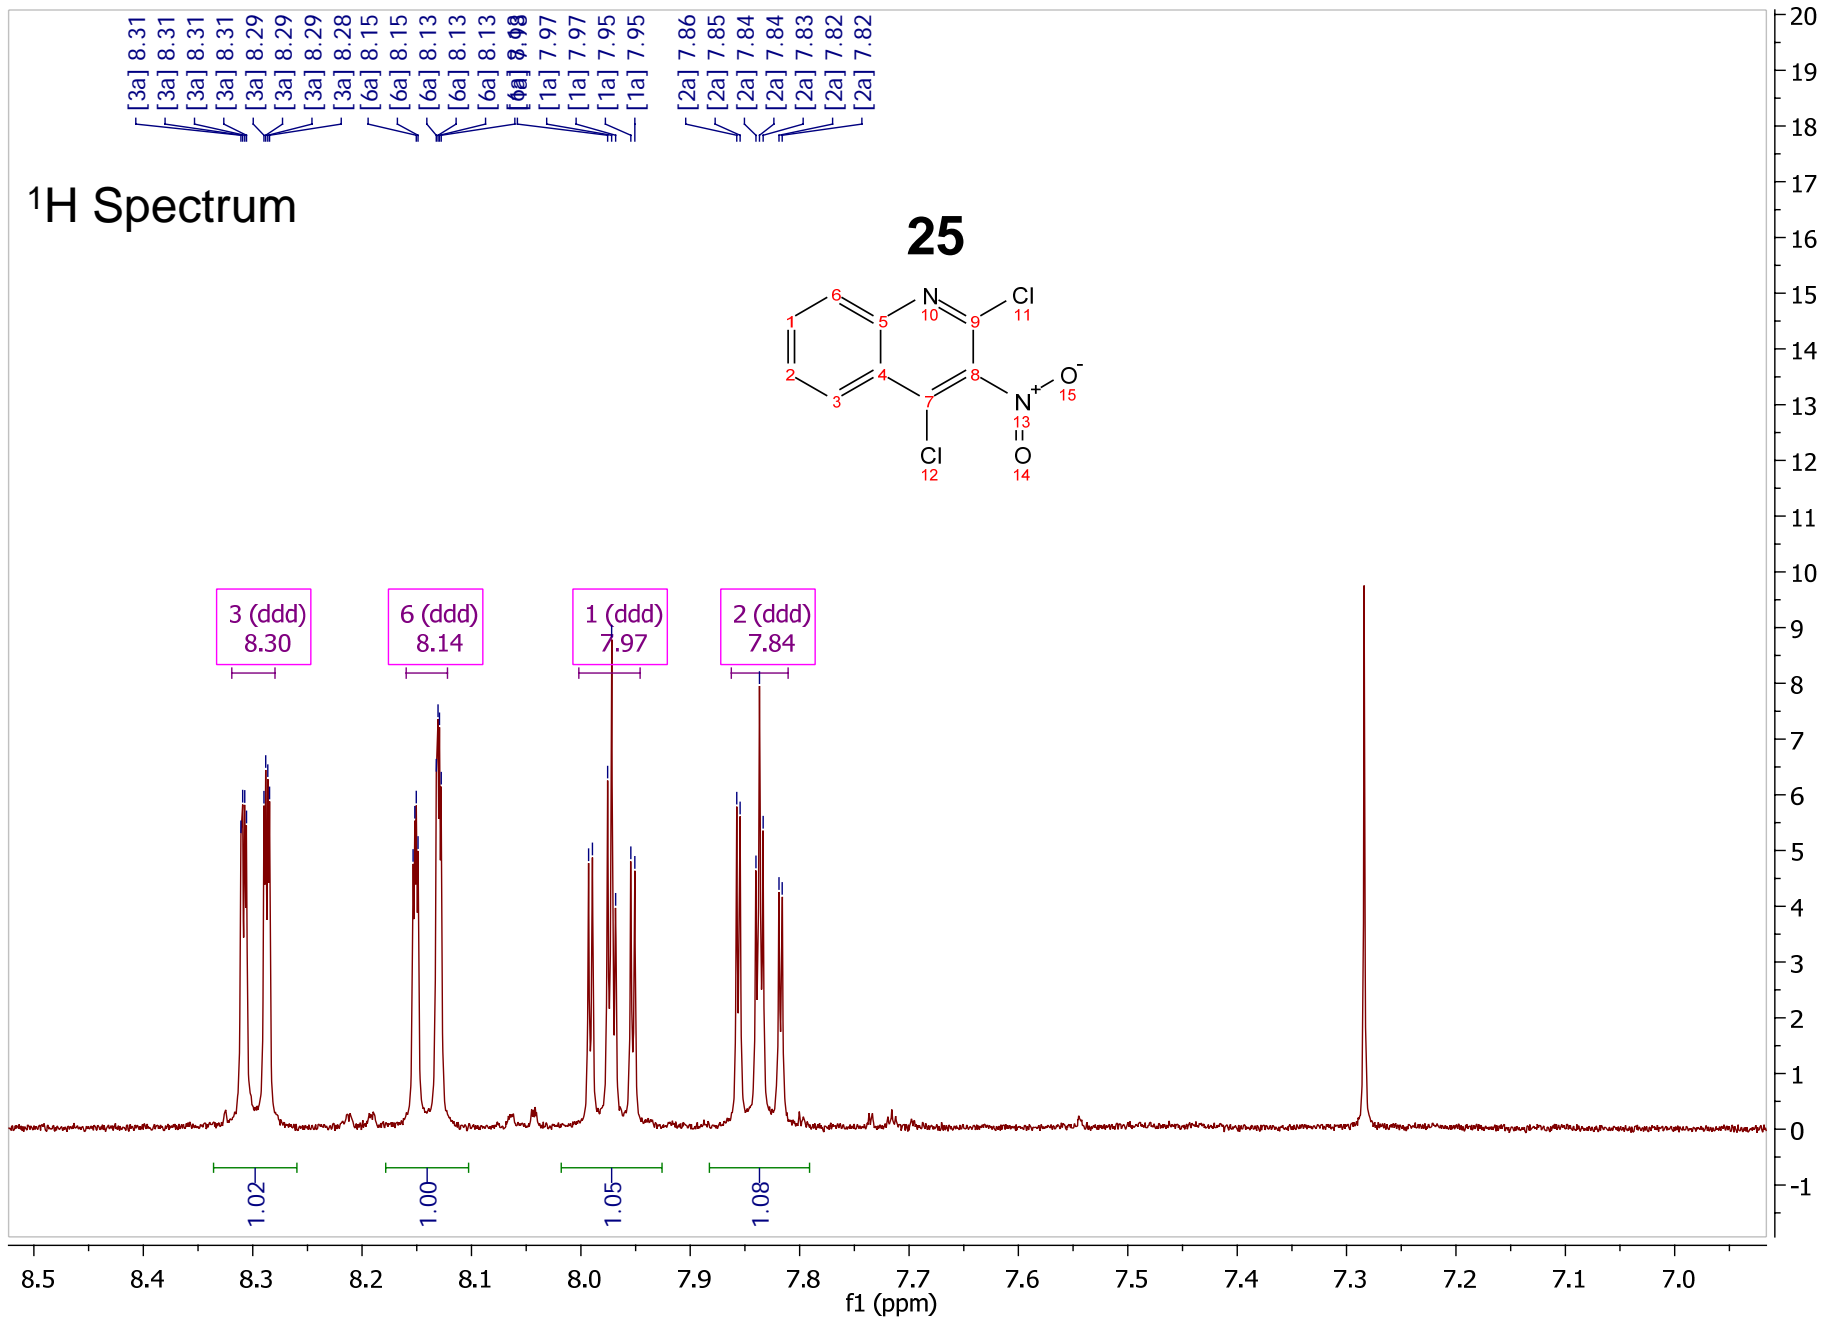

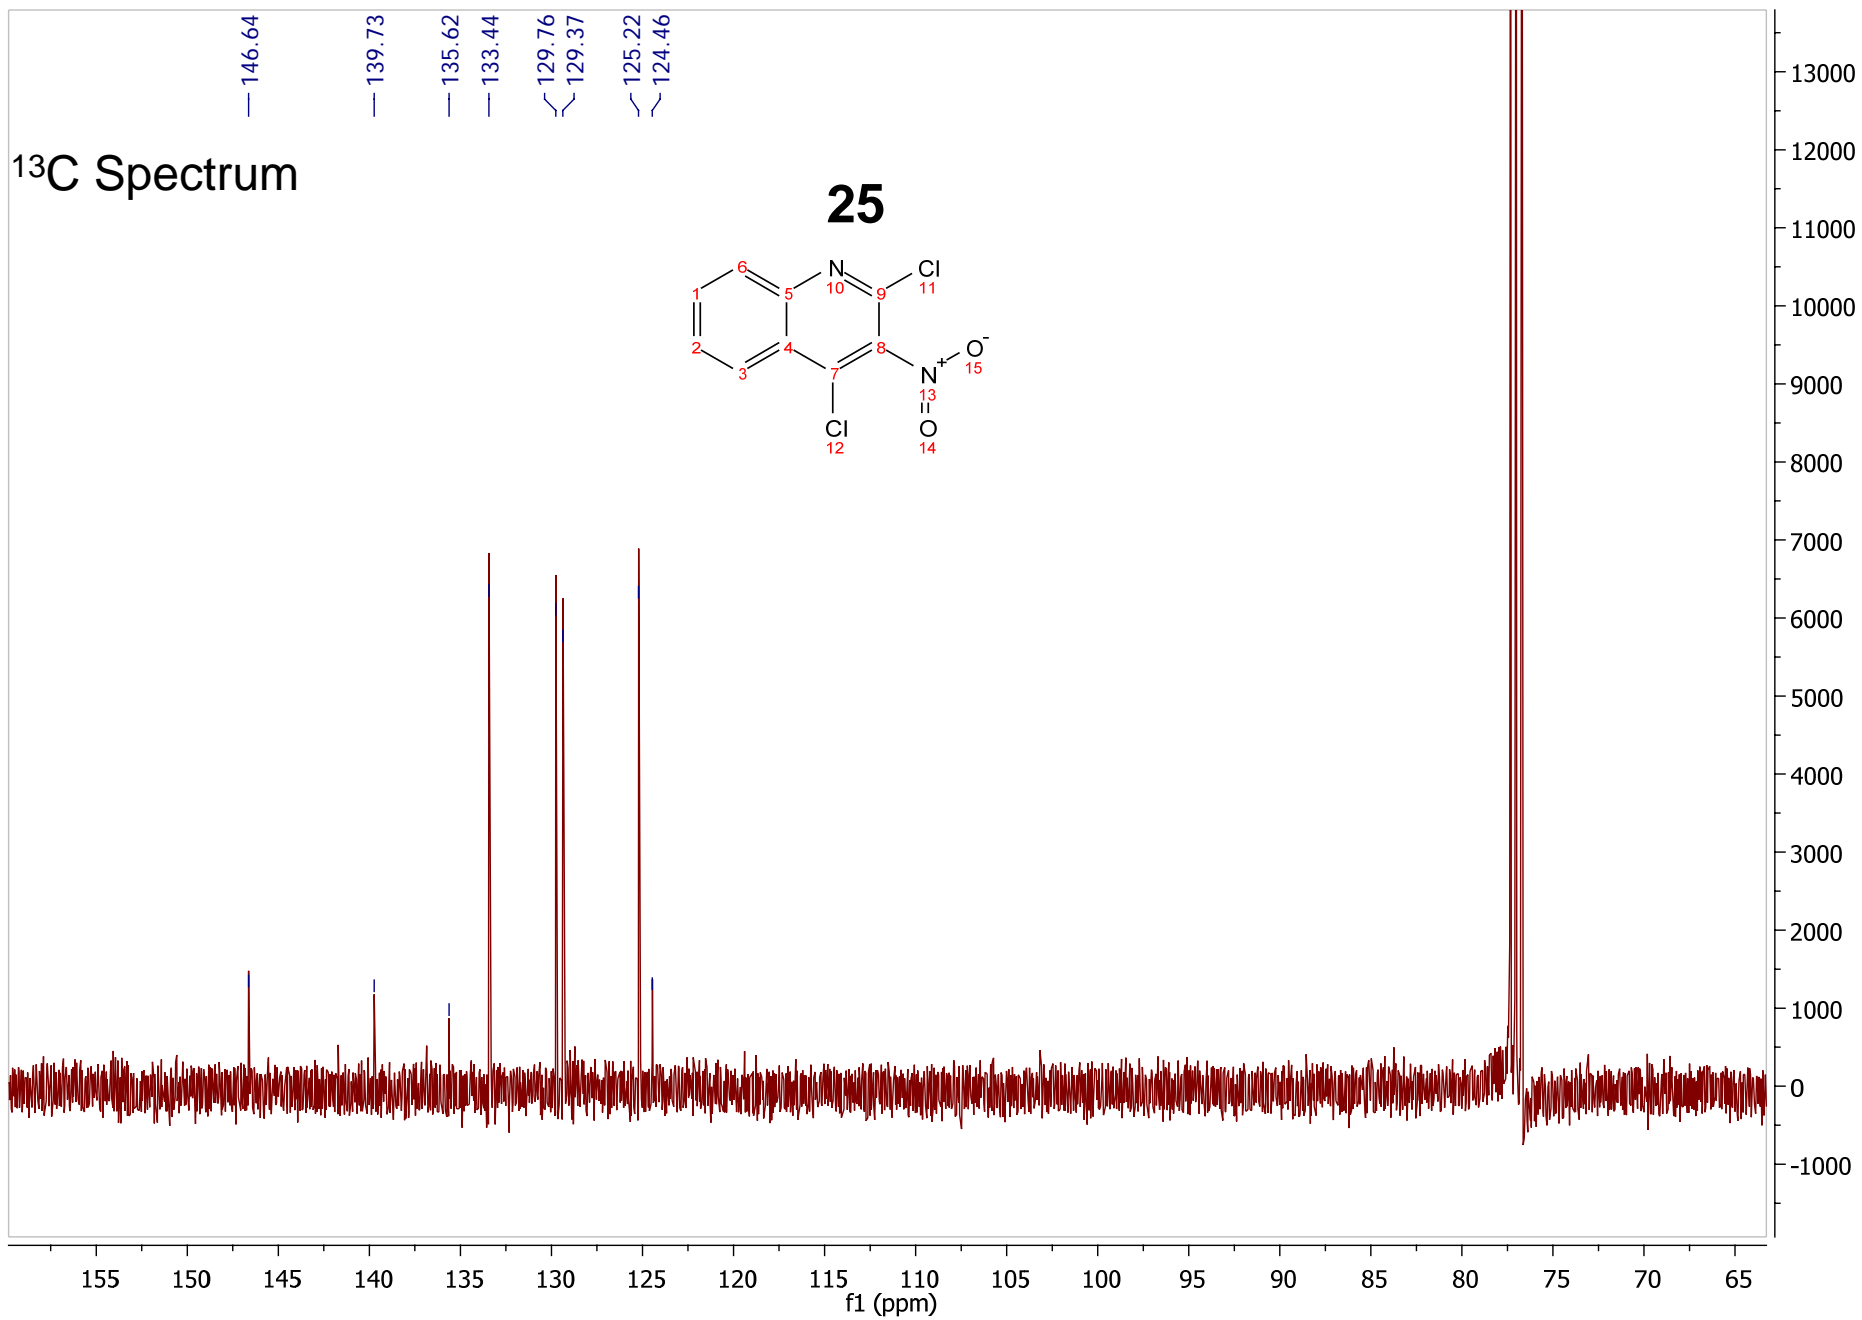



# <sup>1</sup>H Spectrum

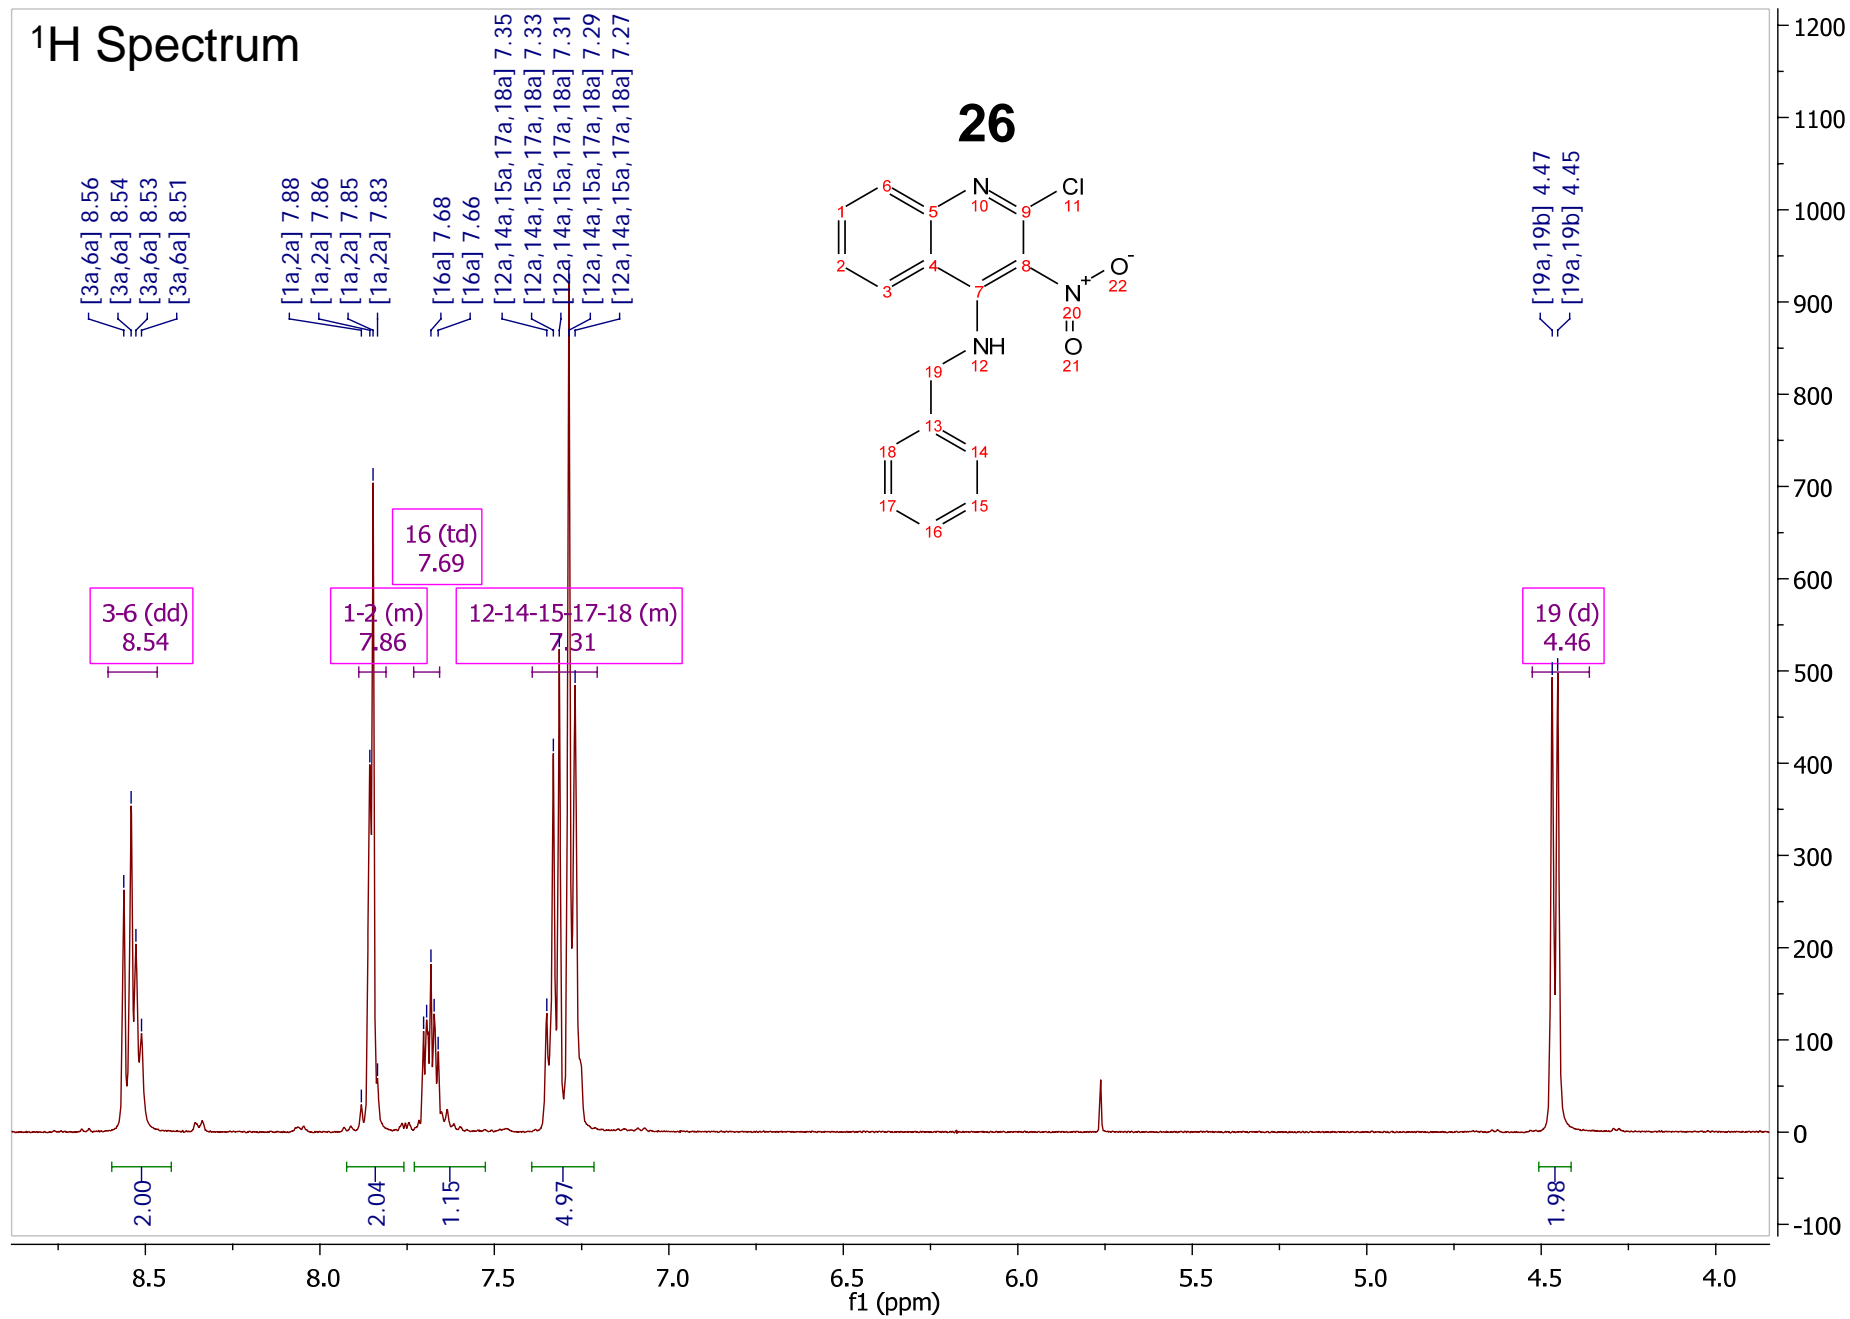

# <sup>13</sup>C Spectrum

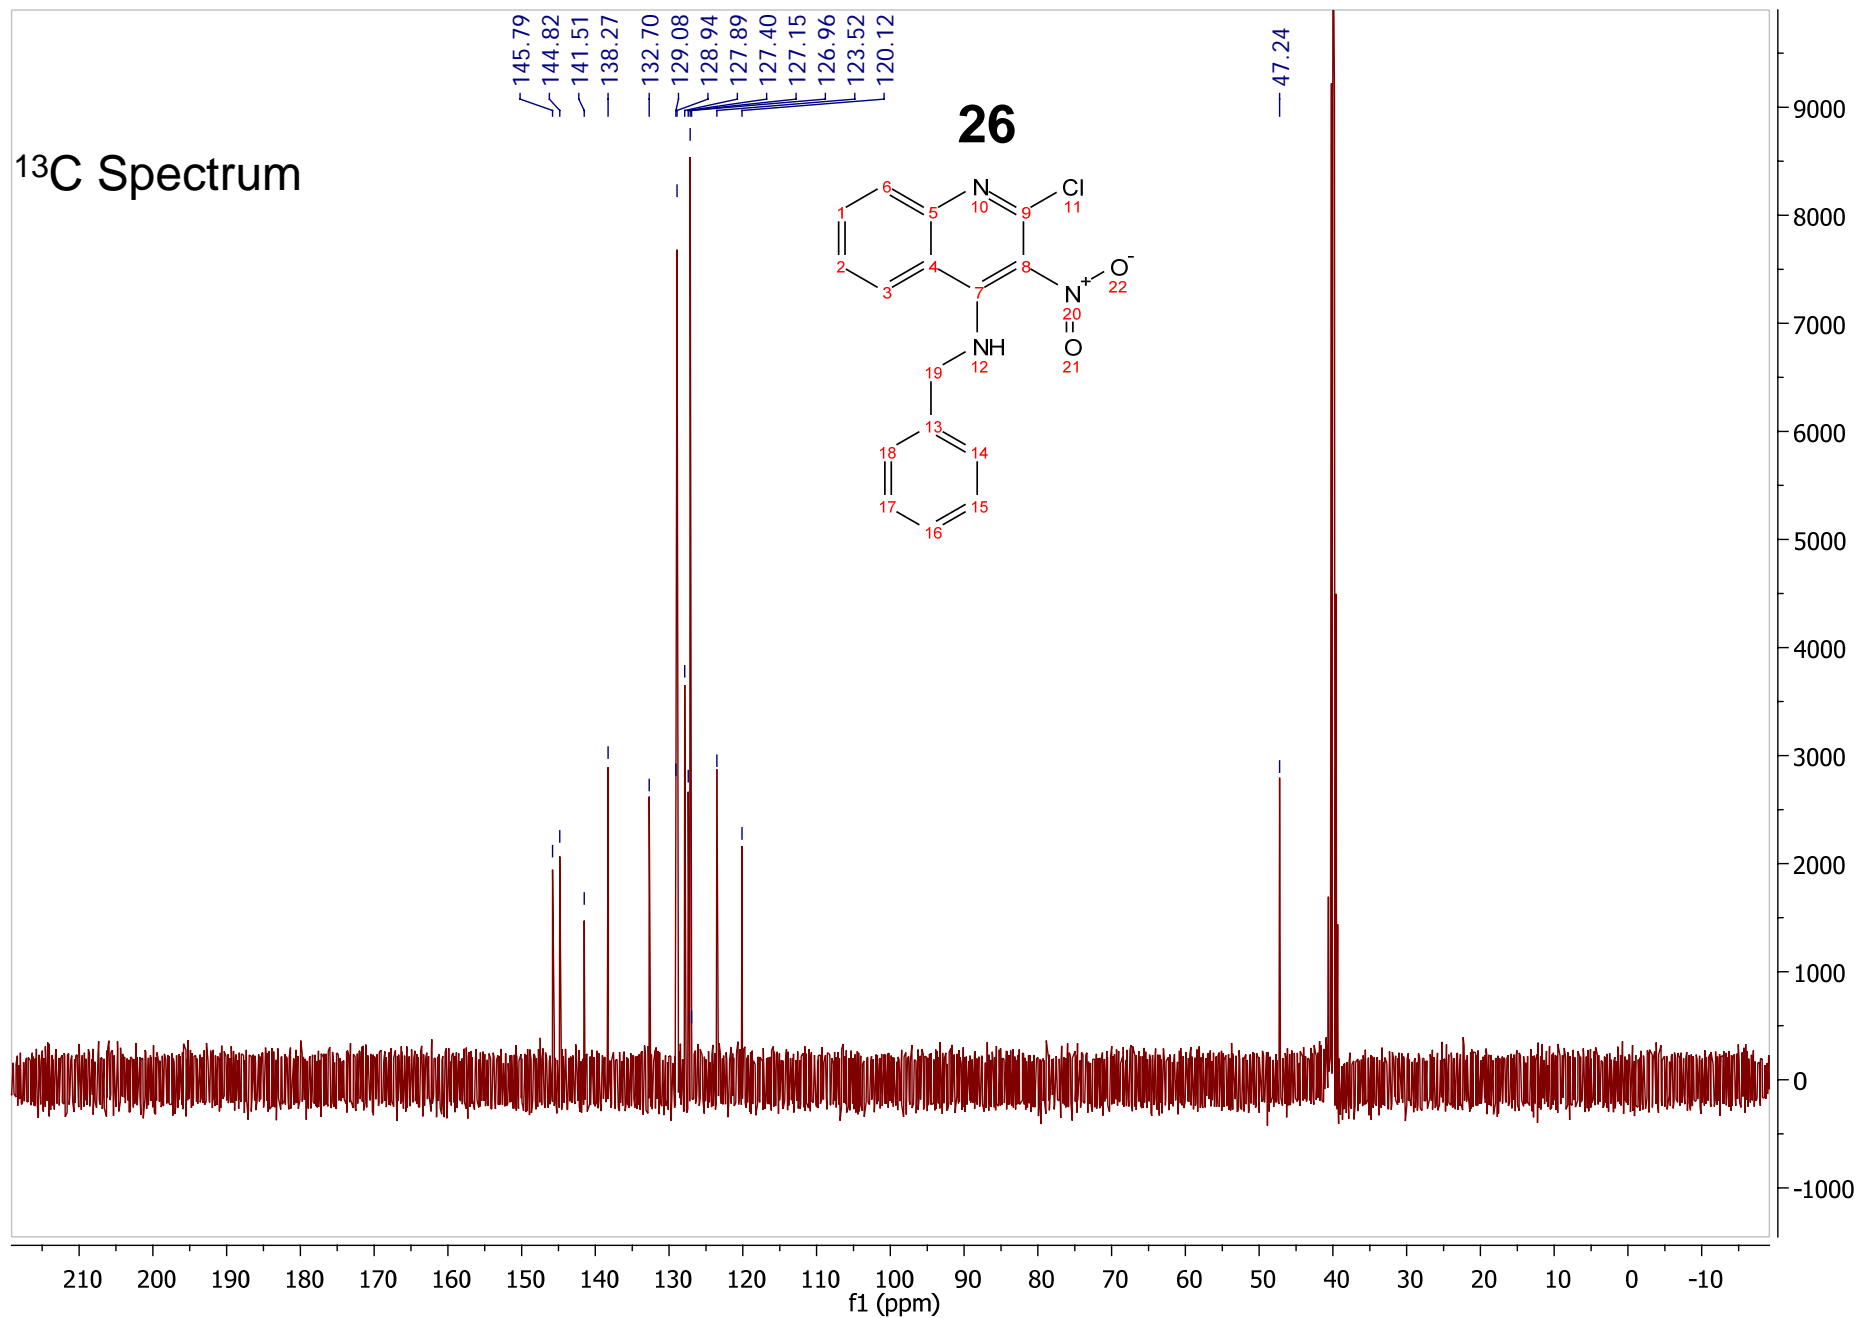

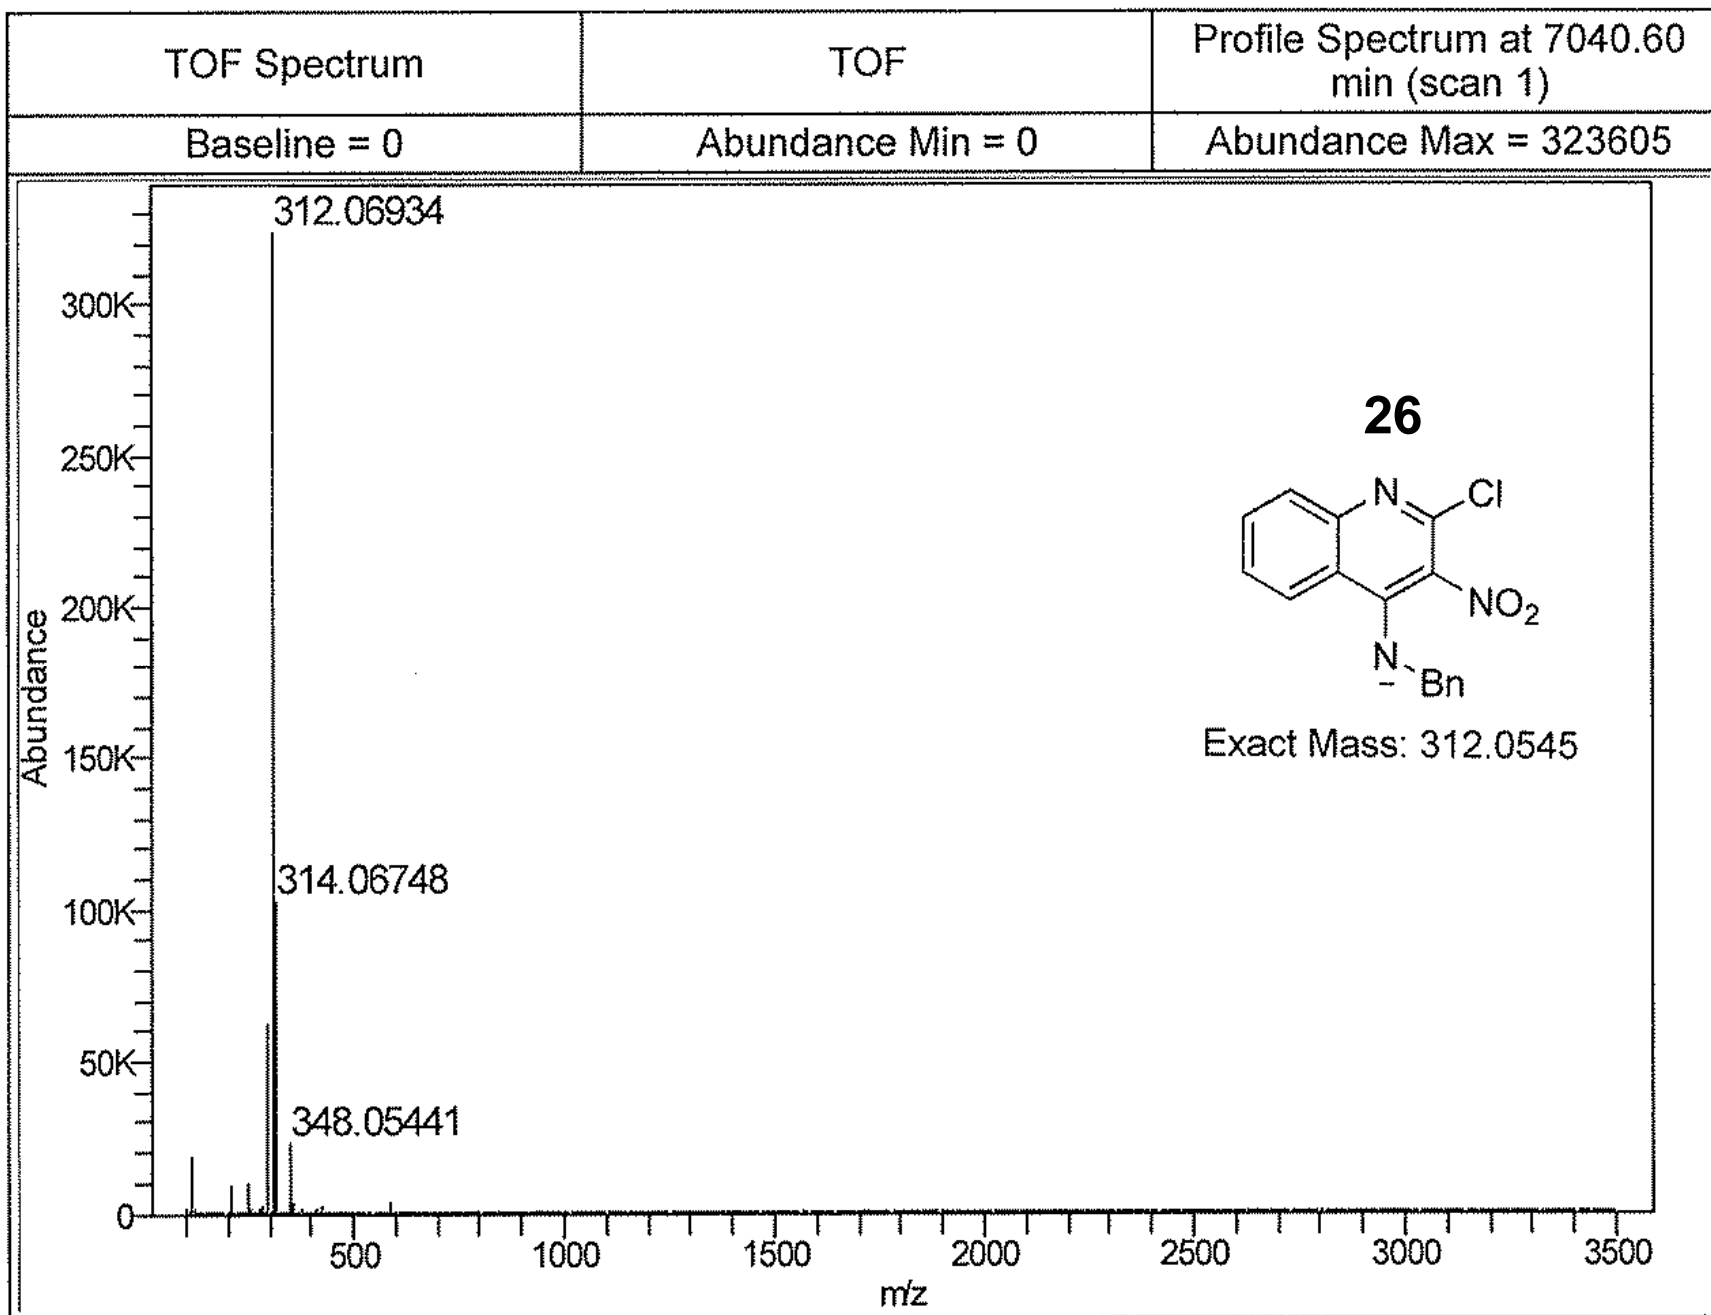

# <sup>1</sup>H Spectrum

[6a] 7.91  
[6a] 7.88  
[3a] 7.69  
[1a] 7.45  
[1a] 7.43  
[1a] 7.41  
[2a, 16a, 20a] 7.37  
[2a, 16a, 20a] 7.35  
[2a, 16a, 20a] 7.33  
[17a, 19a] 7.27  
[17a, 19a] 7.26  
[17a, 19a] 7.24  
[18a] 7.21  
[18a] 7.19

**27**

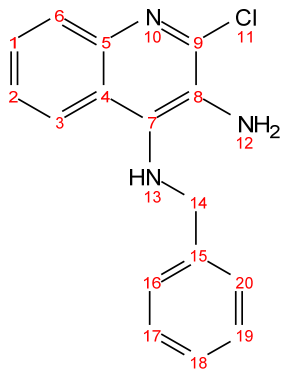

2-16-20 (m)  
7.35  
3 (d)  
7.70  
17-19 (t)  
7.25  
6 (d)  
7.90  
1 (t)  
7.43  
18 (d)  
7.20

[14a, 14b] 4.51

14 (s)  
4.51

1.04

1.00

1.01

3.07

2.09

1.11

2.13

8.2 8.0 7.8 7.6 7.4 7.2 7.0 6.8 6.6 6.4 6.2 6.0 5.8 5.6 5.4 5.2 5.0 4.8 4.6 4.4 4.2 4.0 3.8 3.6 3.4 3.2 3.0 2.8 2.6  
f1 (ppm)

50  
45  
40  
35  
30  
25  
20  
15  
10  
5  
0

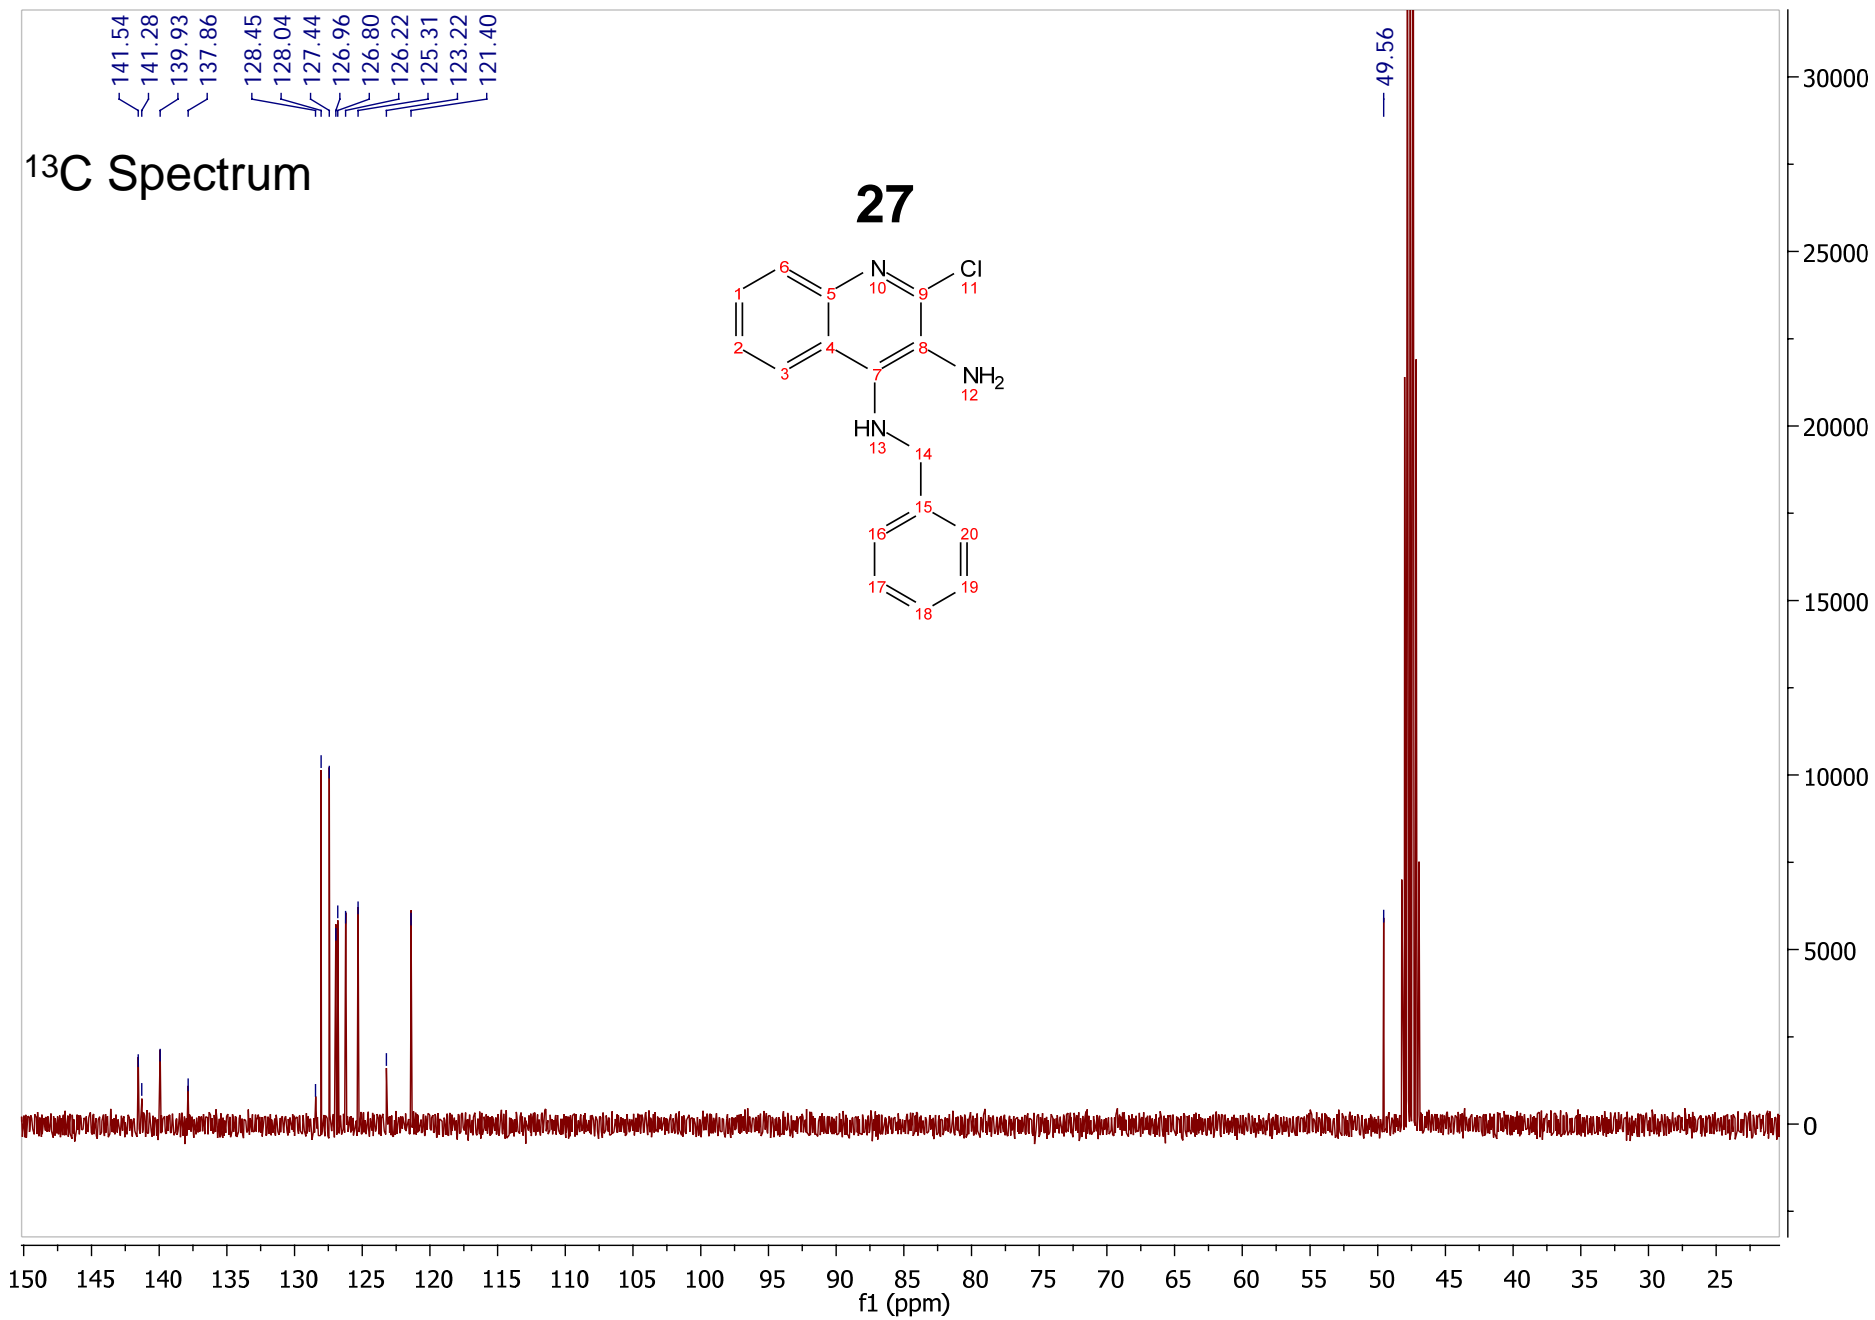

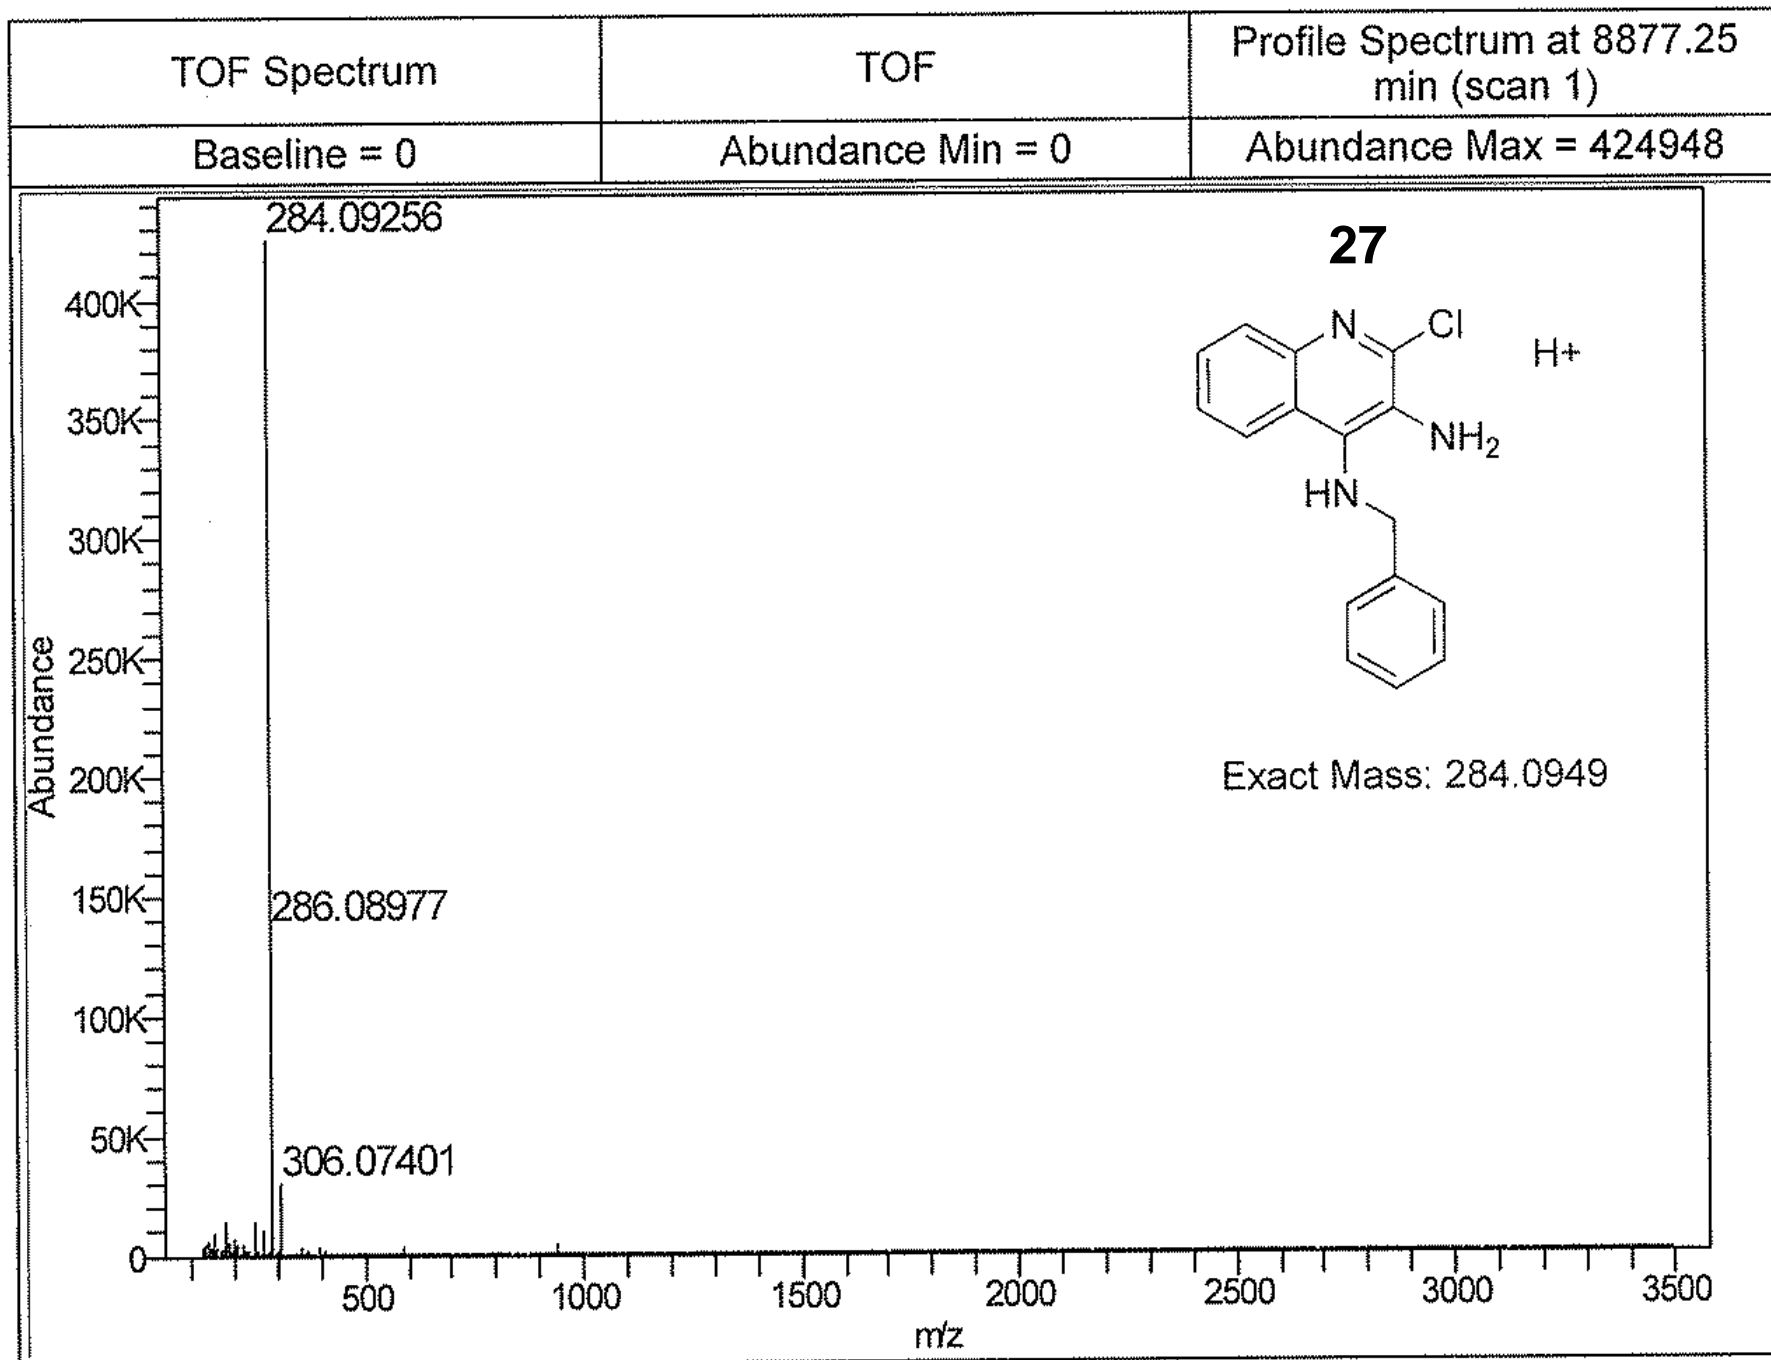

# <sup>1</sup>H Spectrum

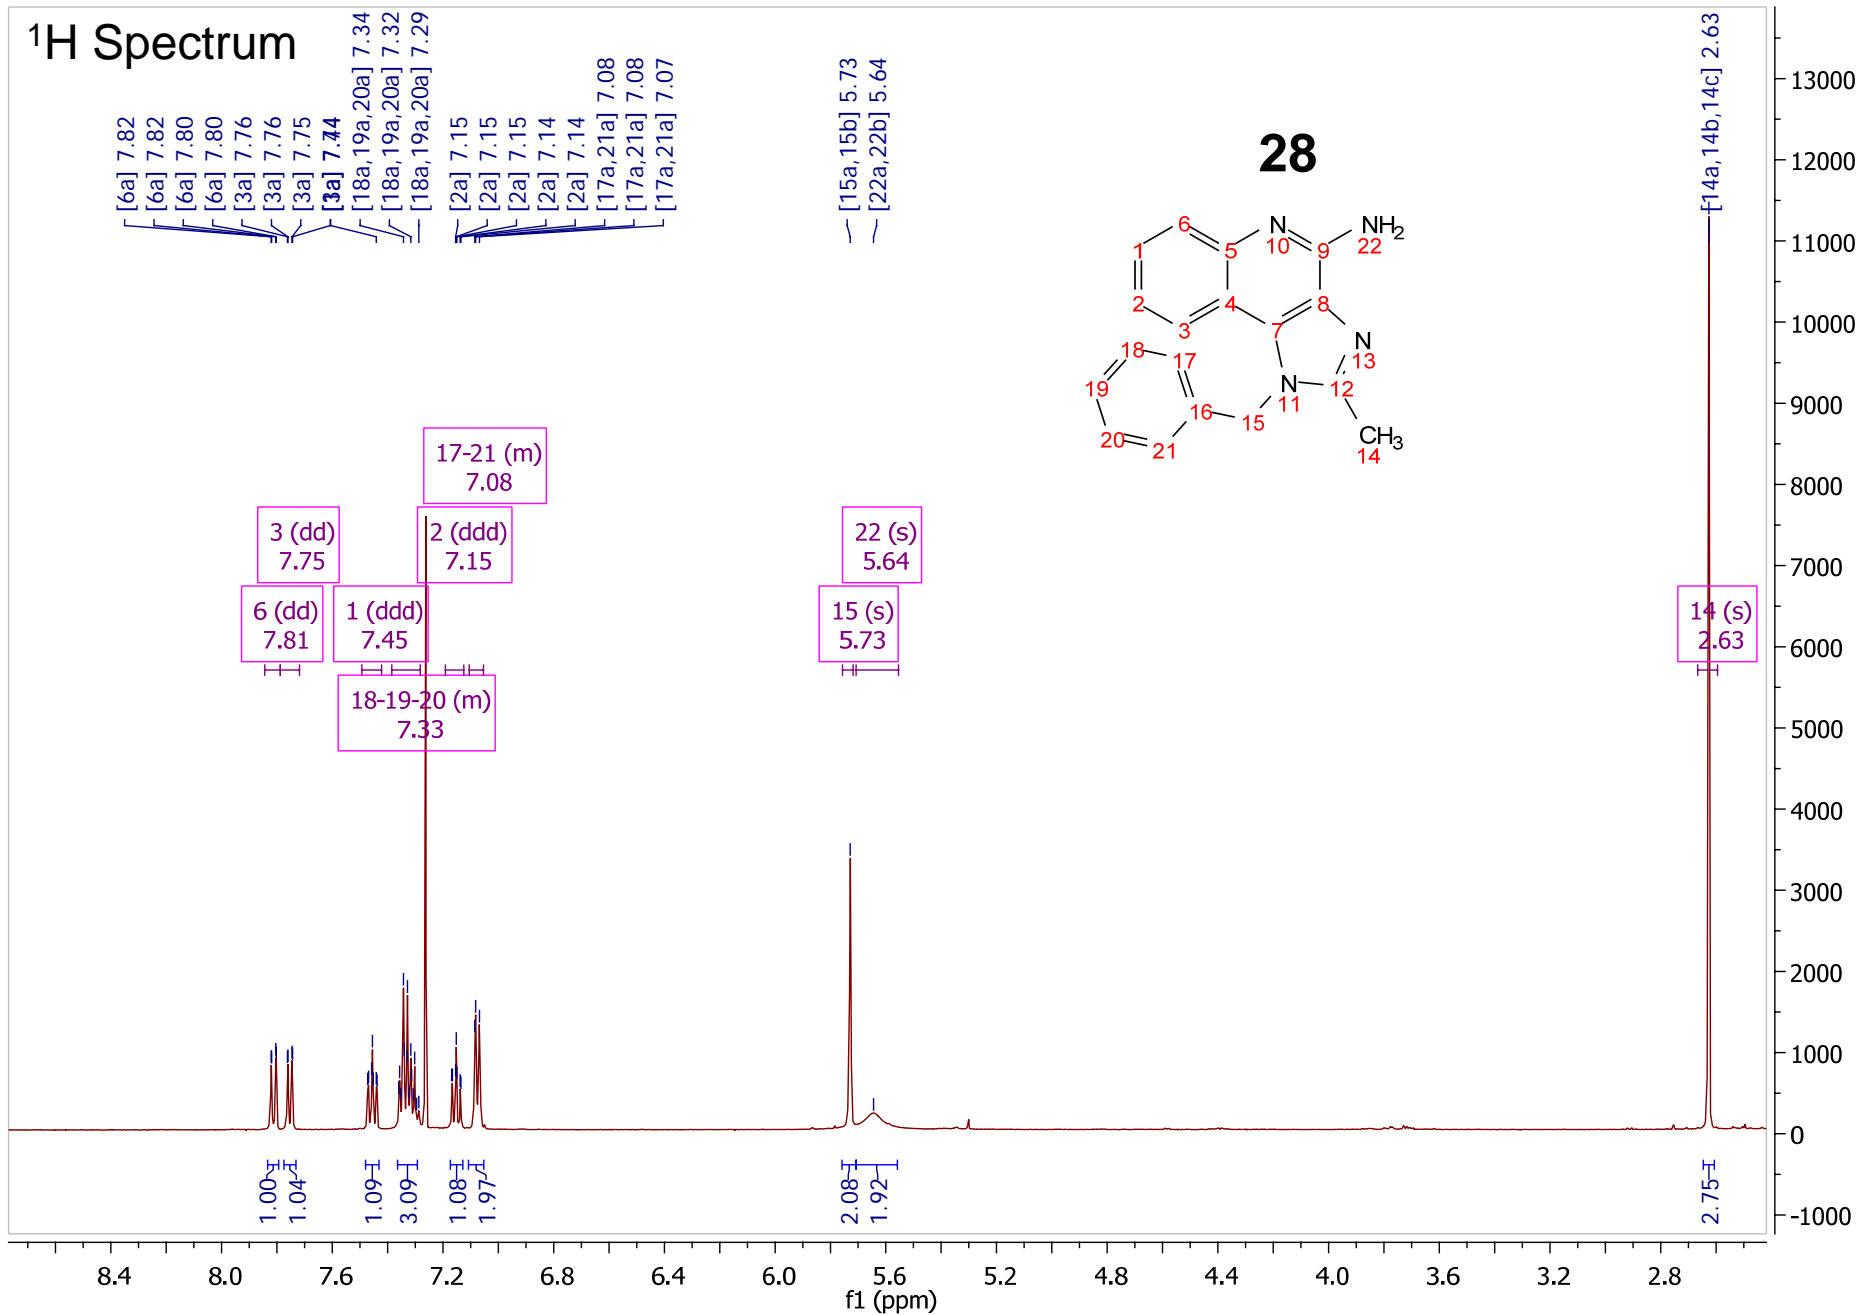

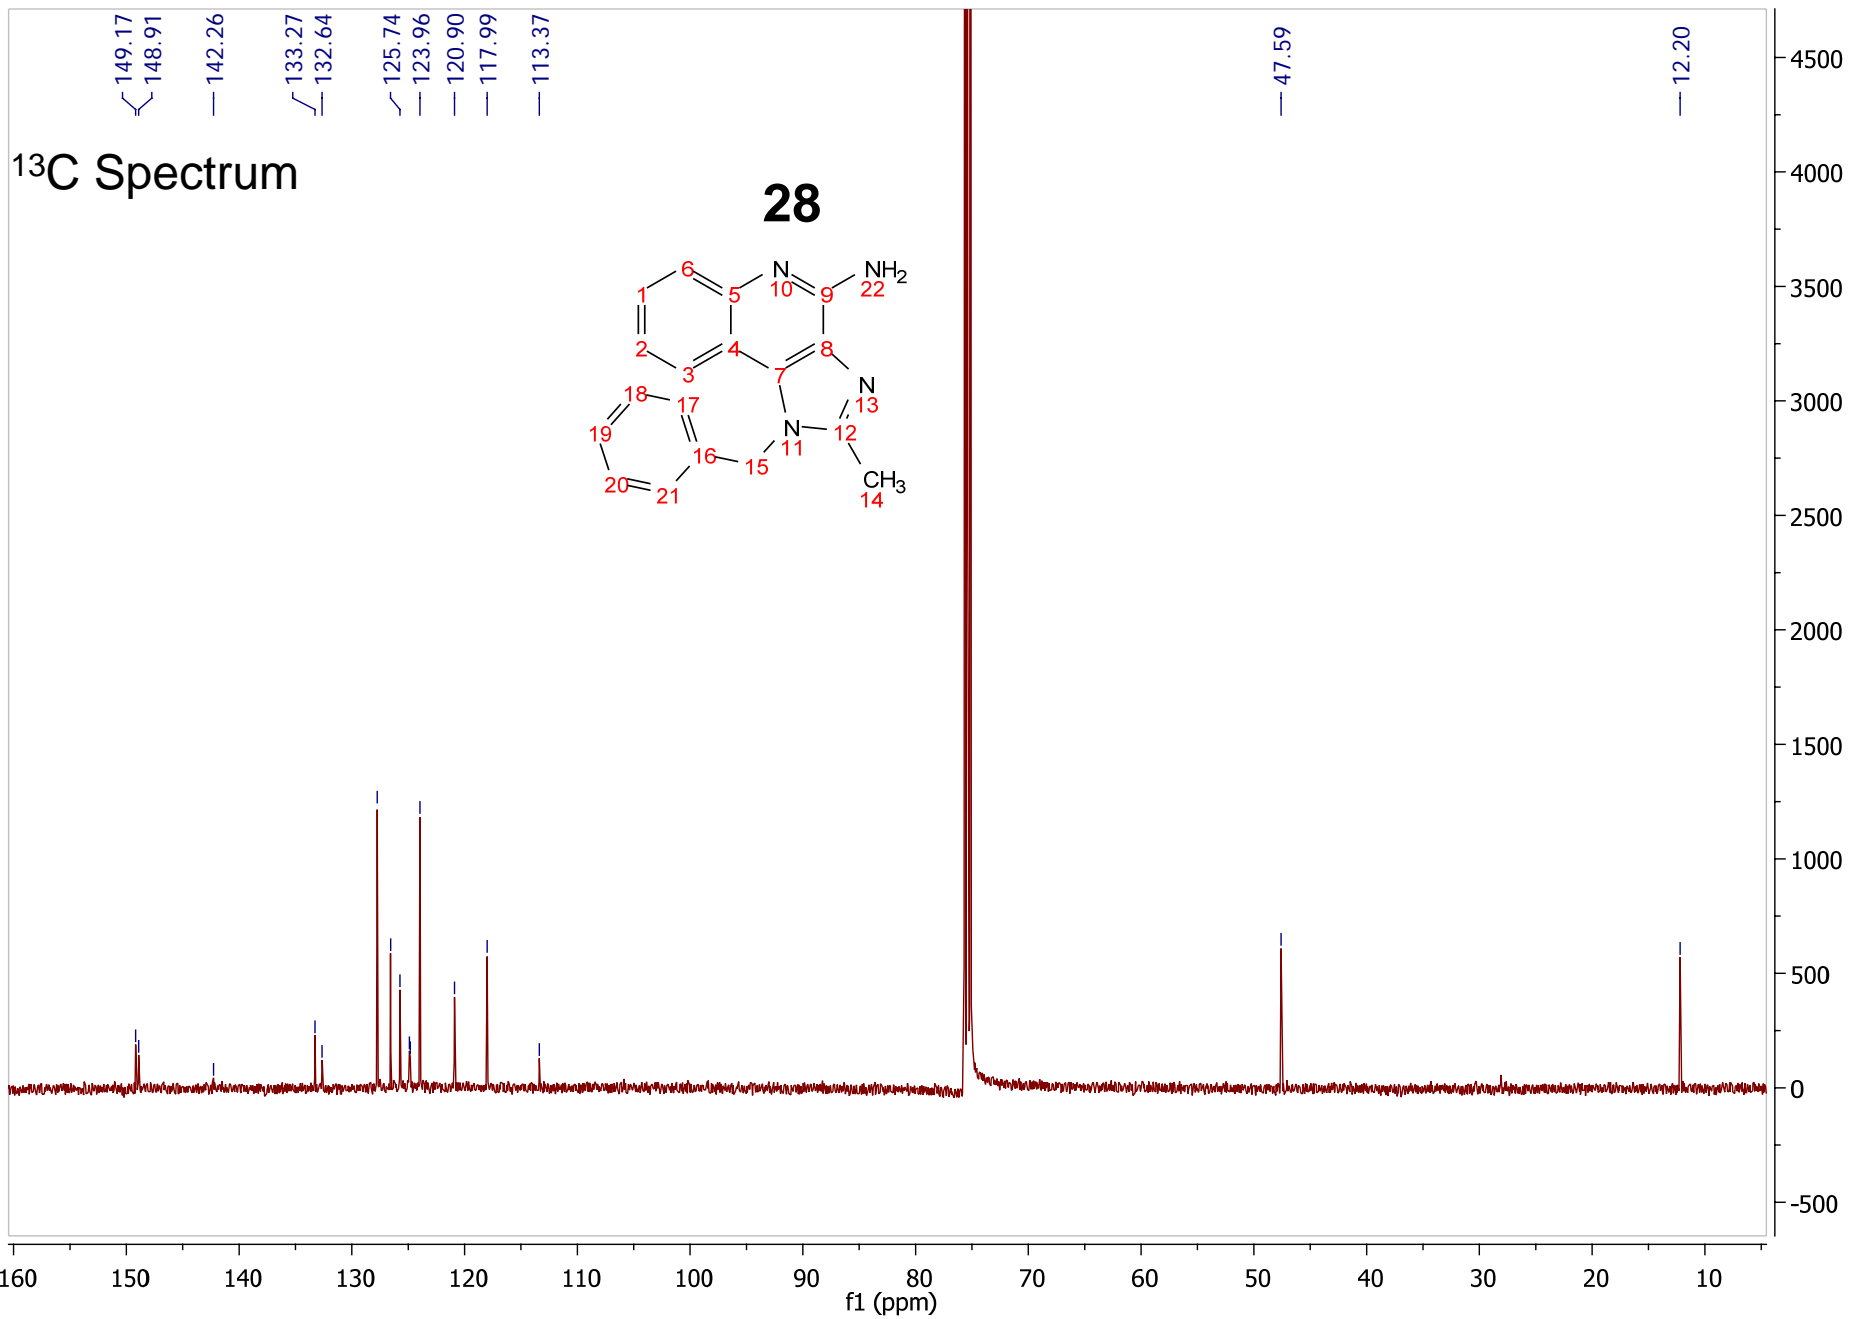



|              |                   |                                           |
|--------------|-------------------|-------------------------------------------|
| TOF Spectrum | TOF               | Profile Spectrum at 21888.19 min (scan 1) |
| Baseline = 0 | Abundance Min = 0 | Abundance Max = 452516                    |

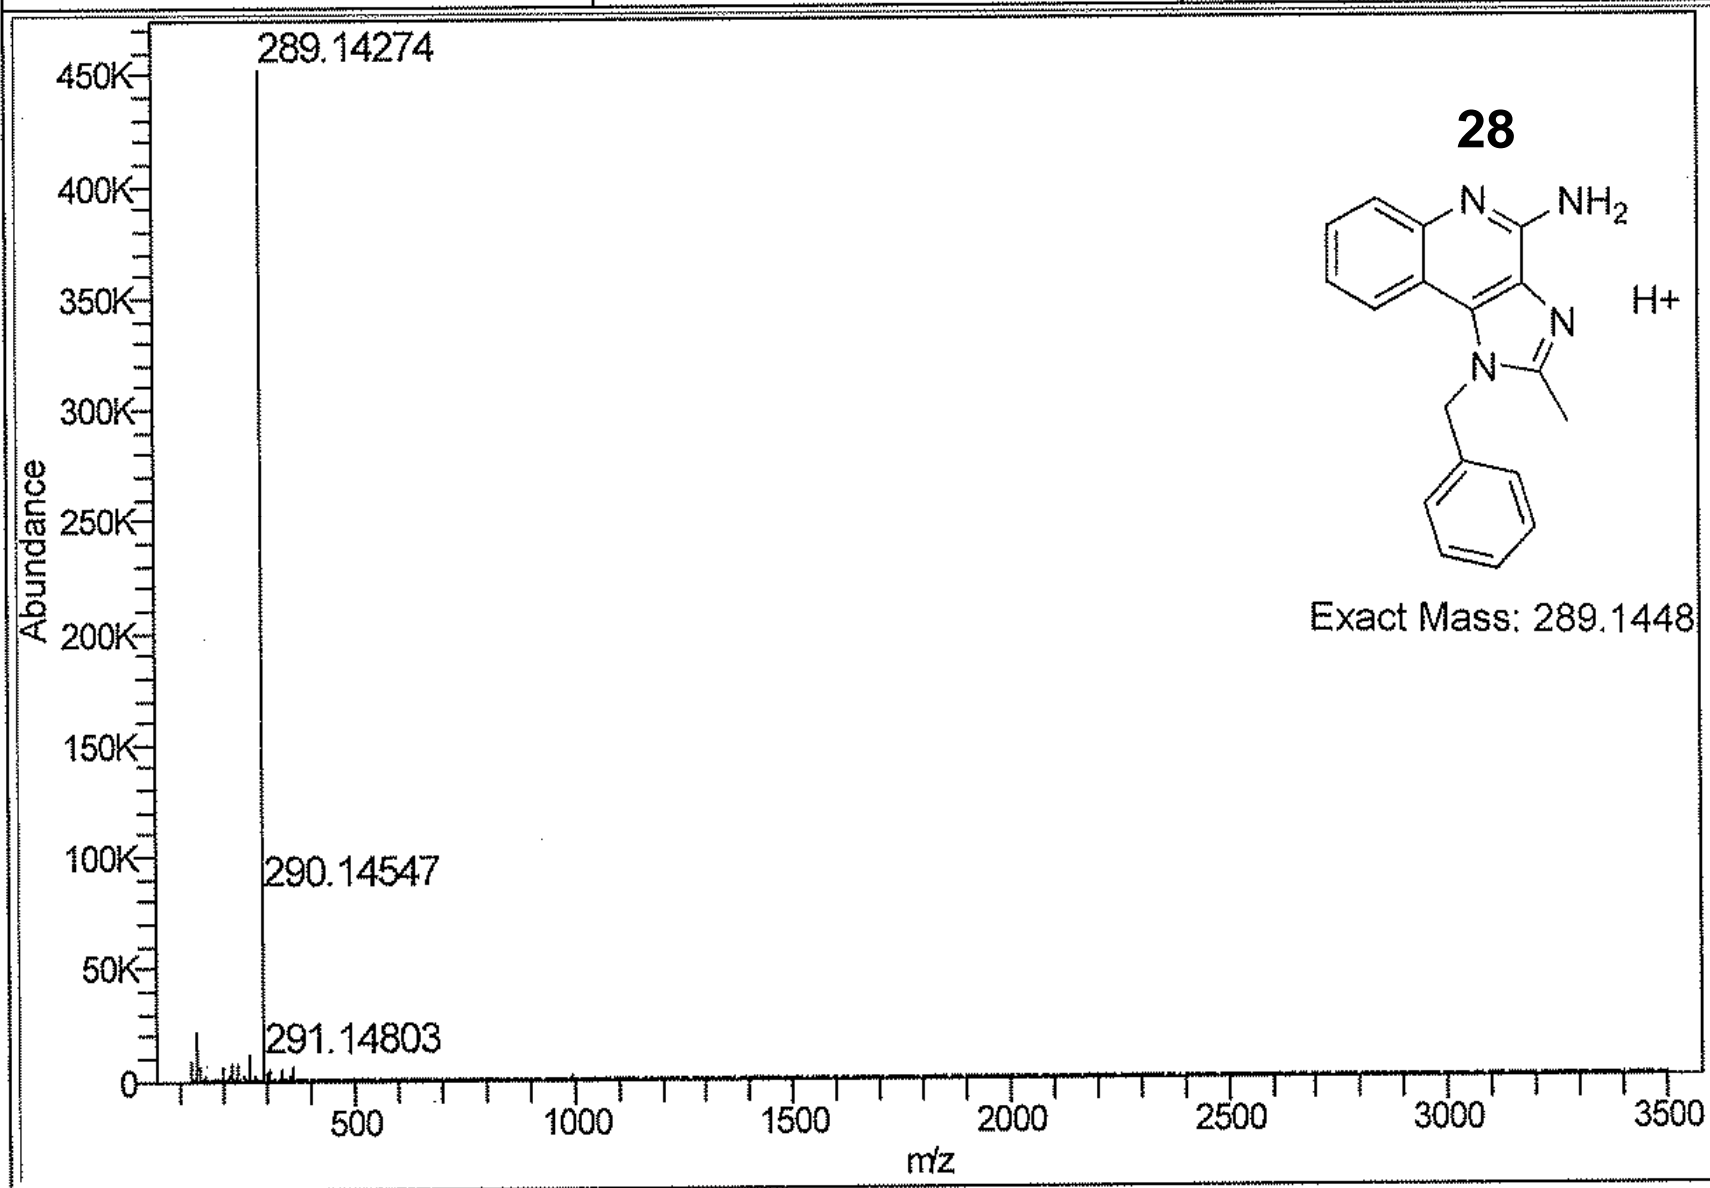

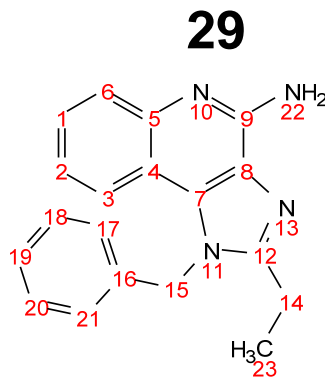

# <sup>1</sup>H Spectrum

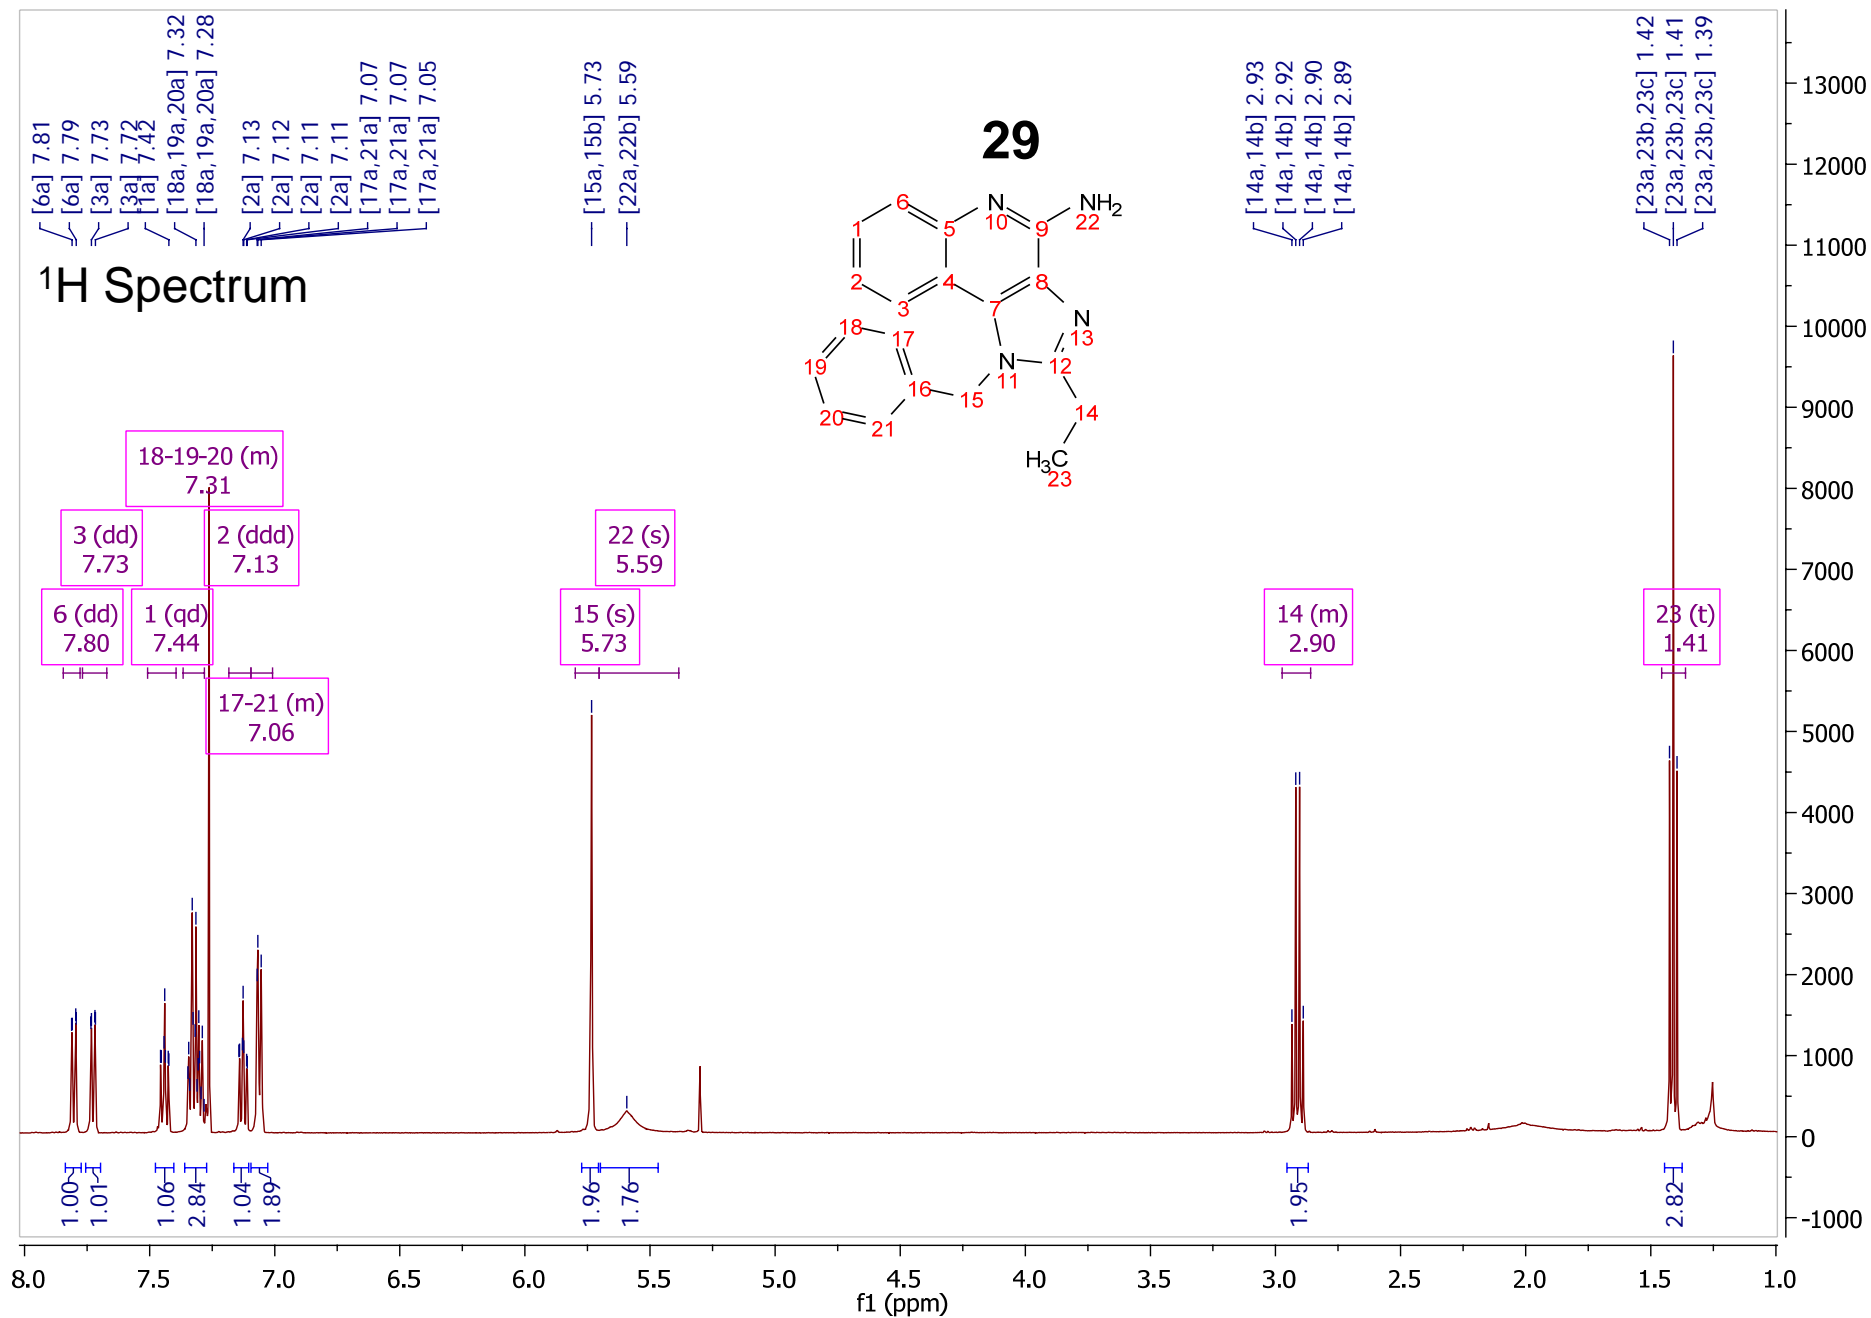

29

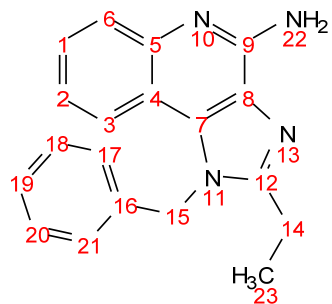

<sup>13</sup>C Spectrum

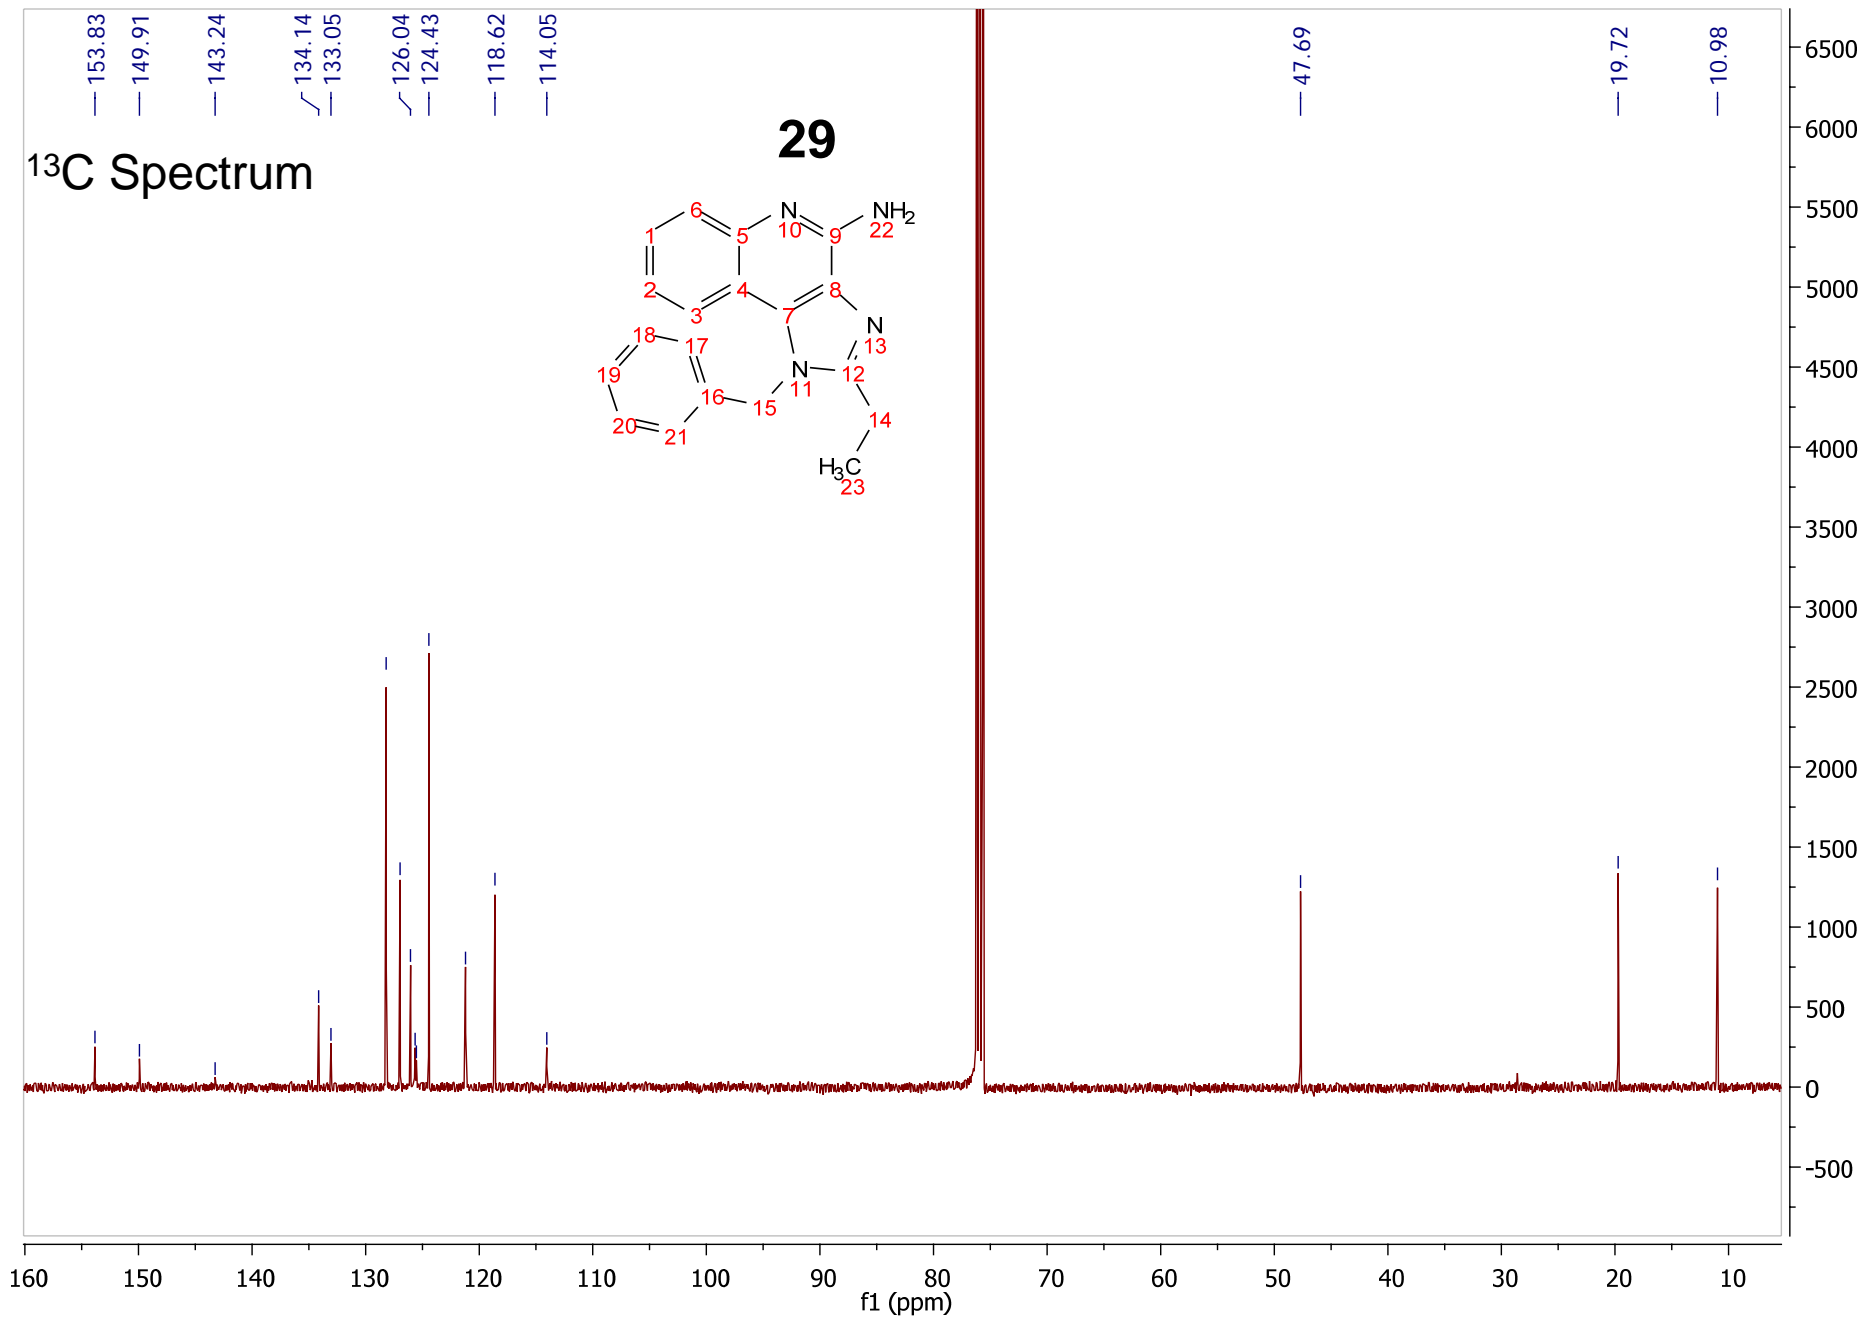

|              |                   |                                           |
|--------------|-------------------|-------------------------------------------|
| TOF Spectrum | TOF               | Profile Spectrum at 21800.80 min (scan 1) |
| Baseline = 0 | Abundance Min = 0 | Abundance Max = 388055                    |

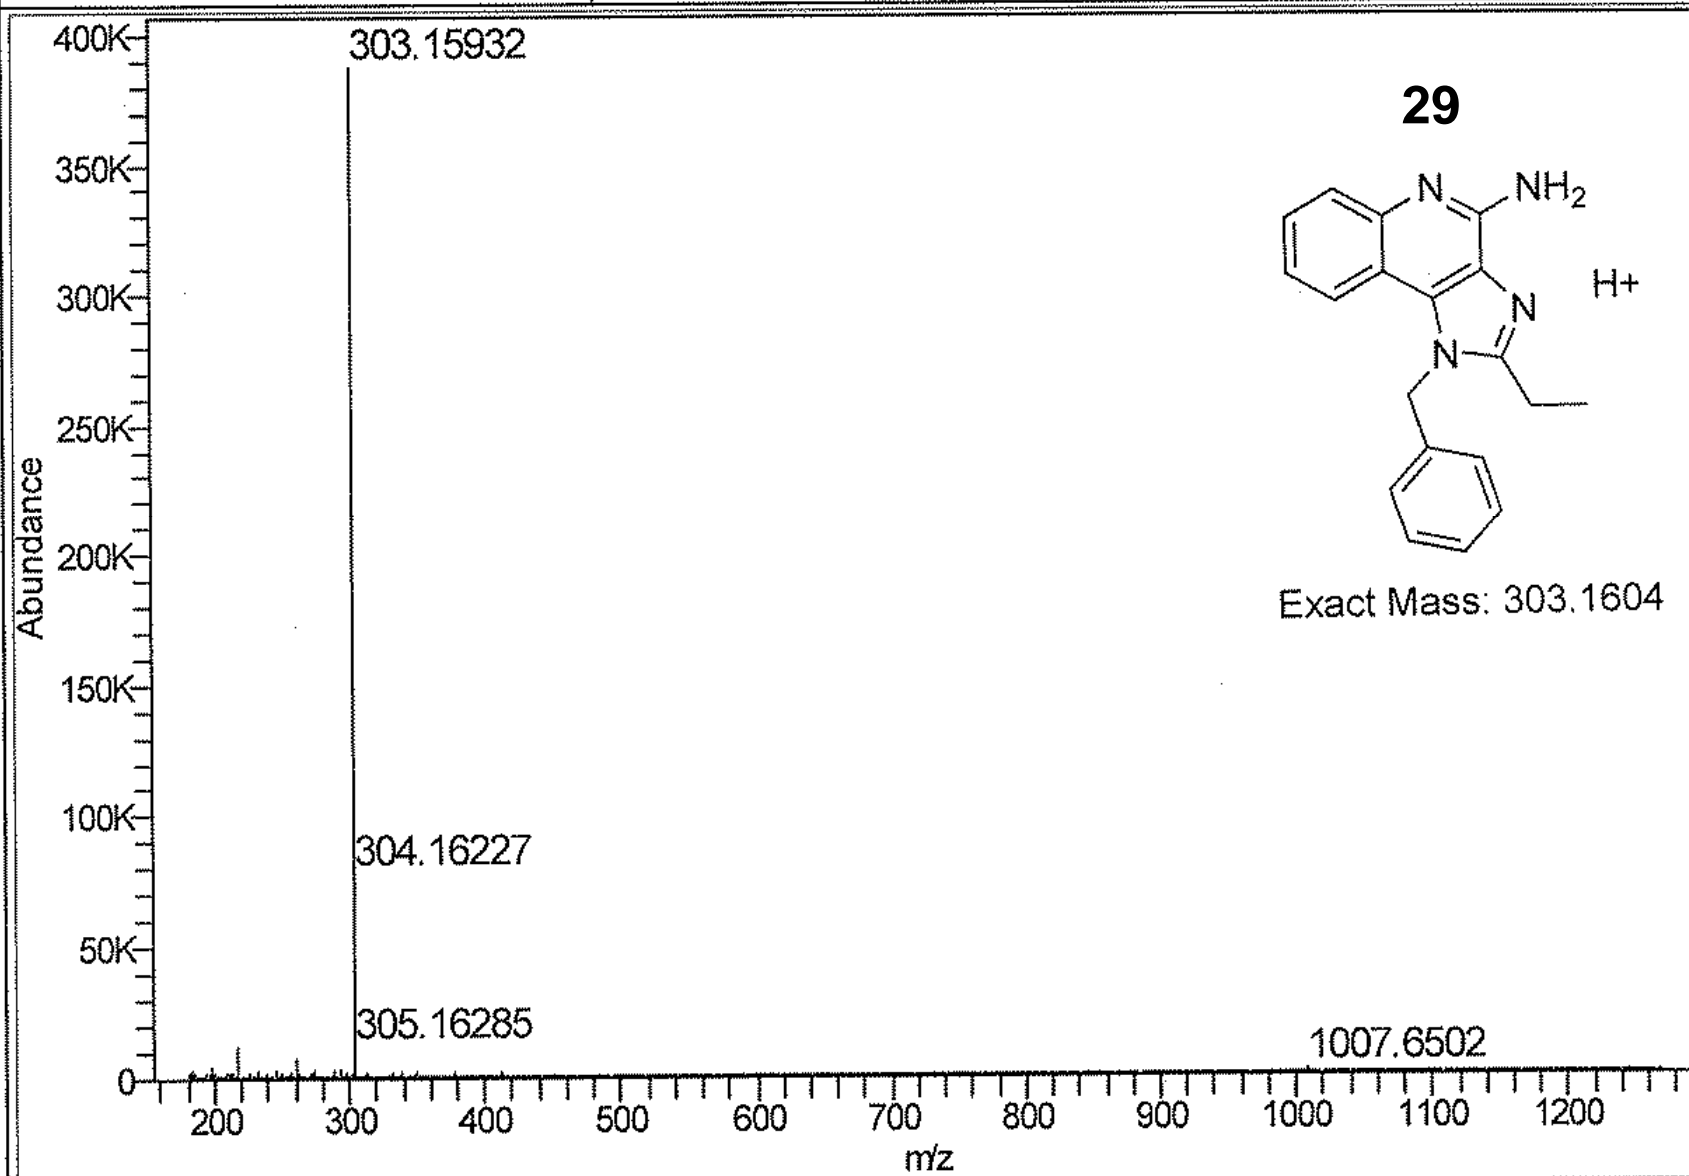

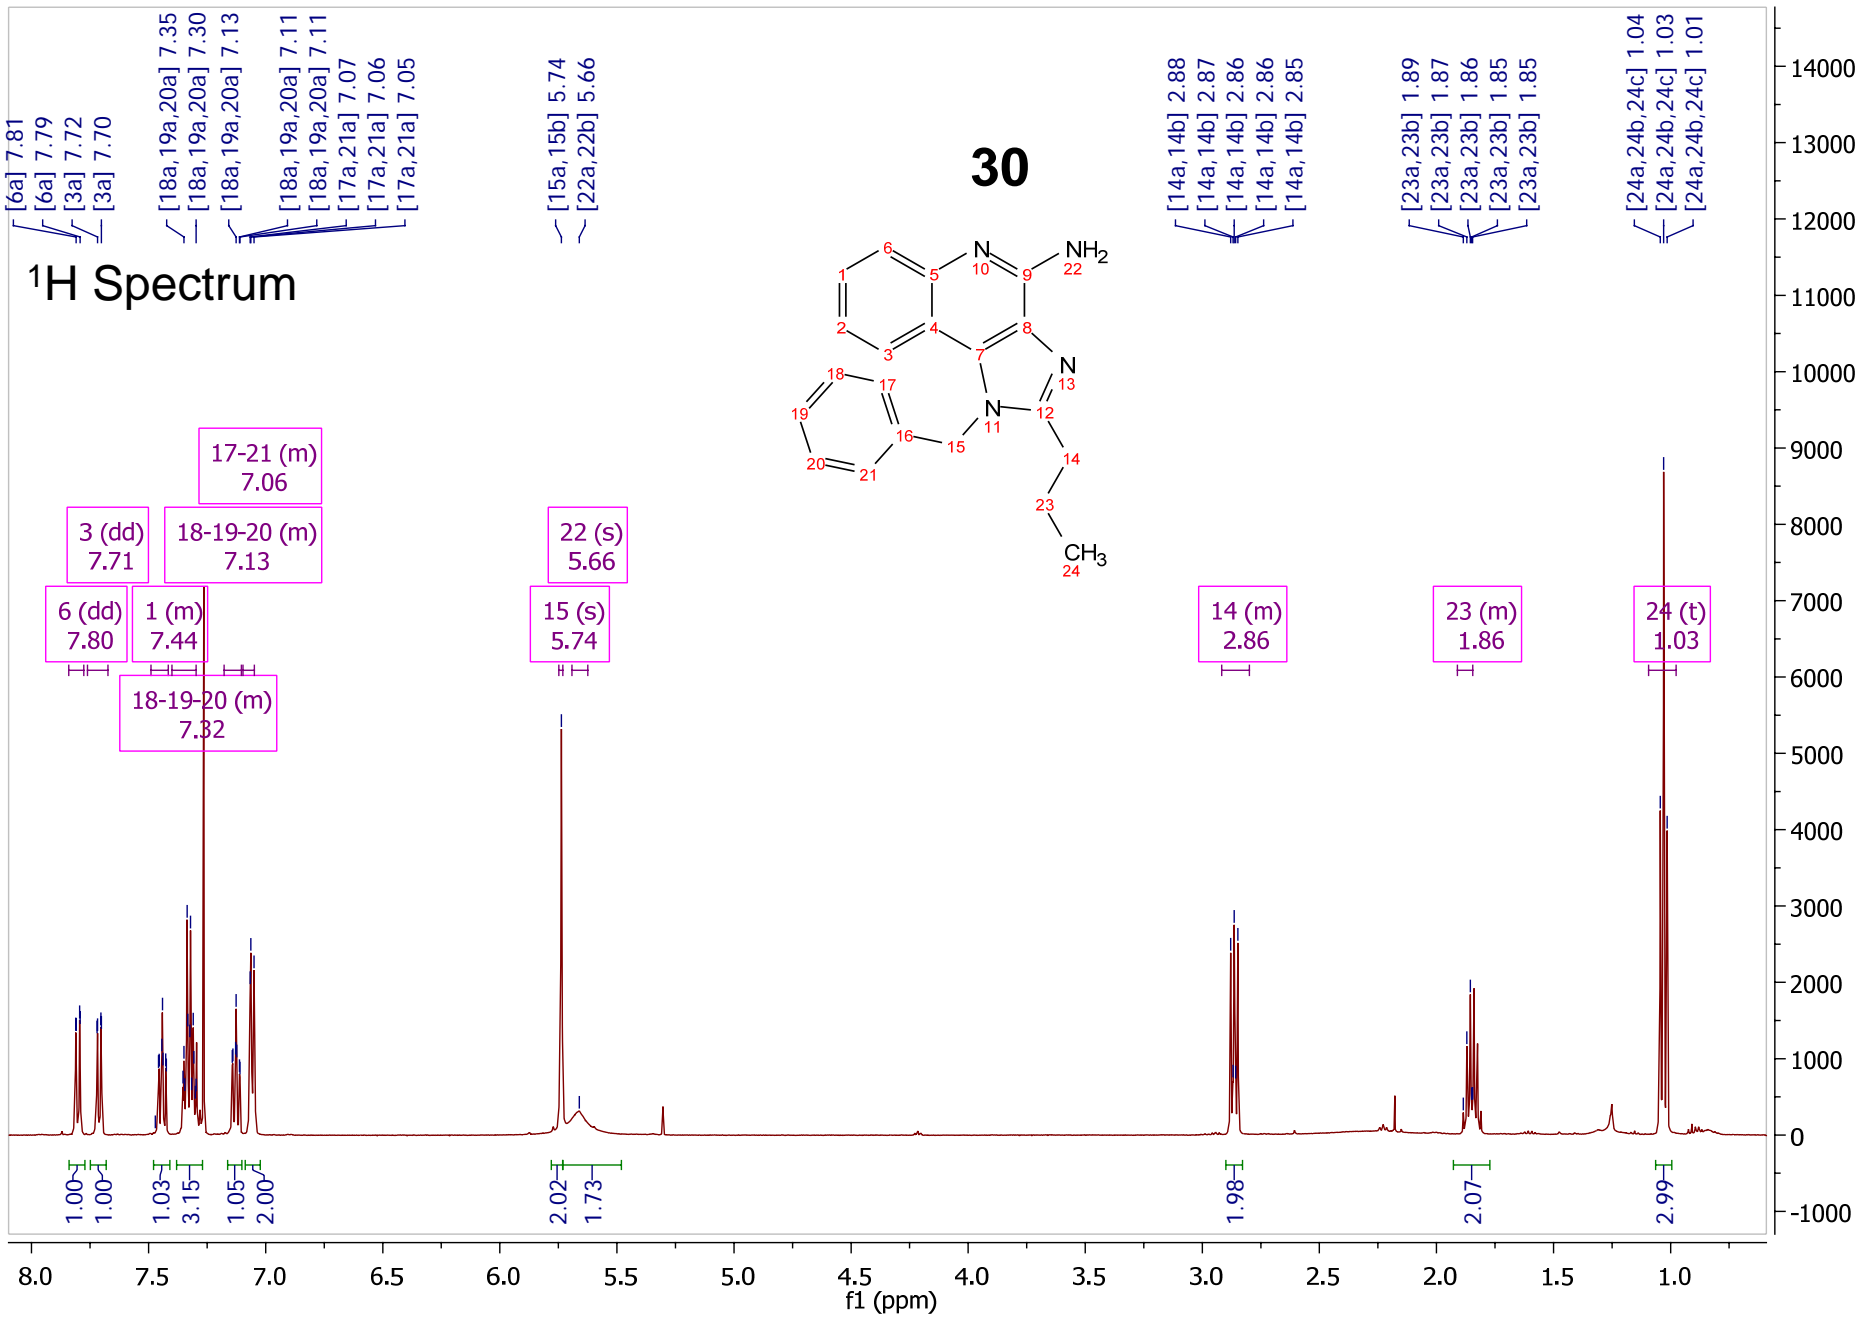

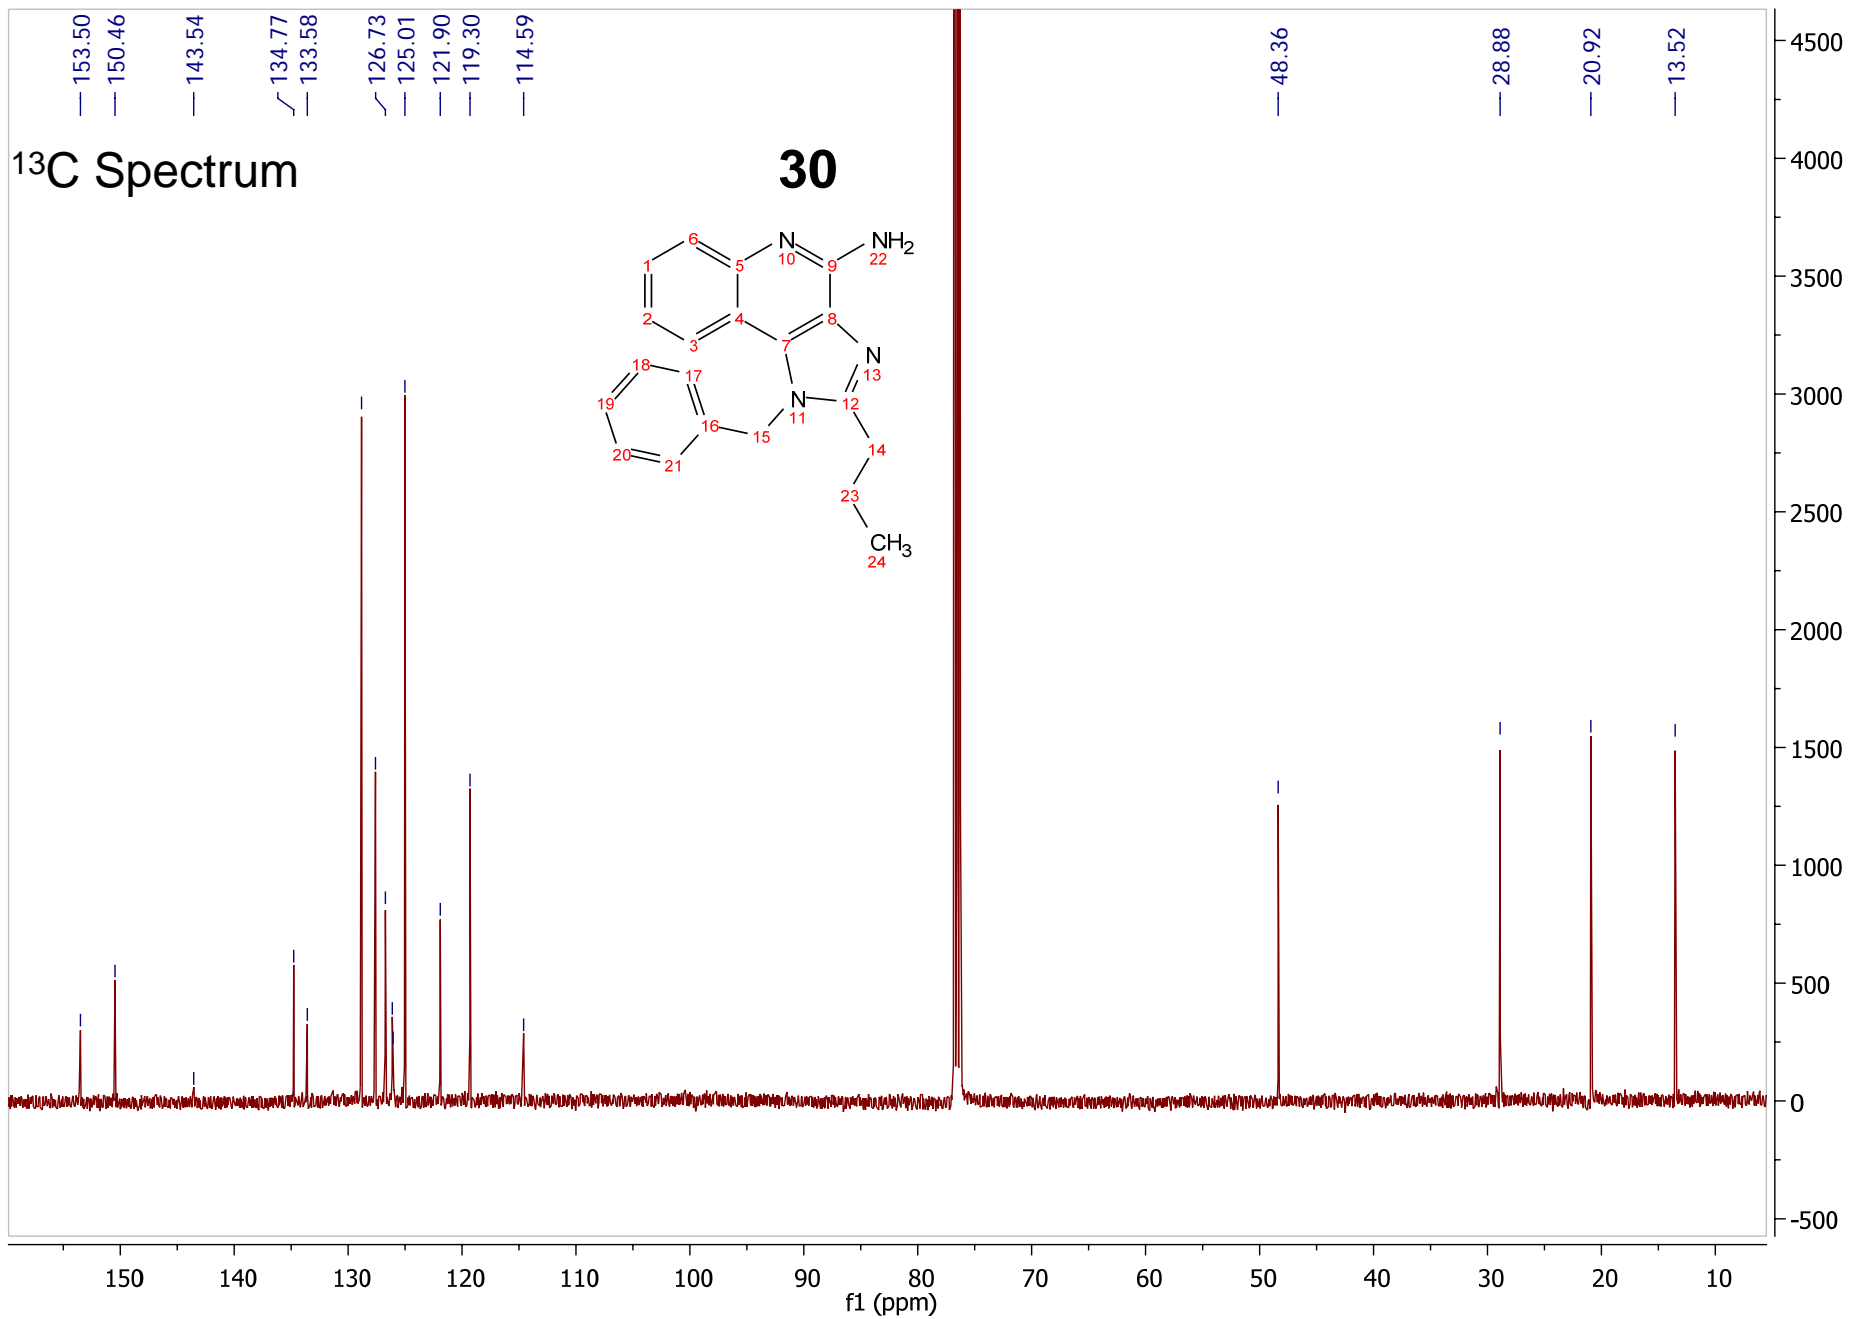

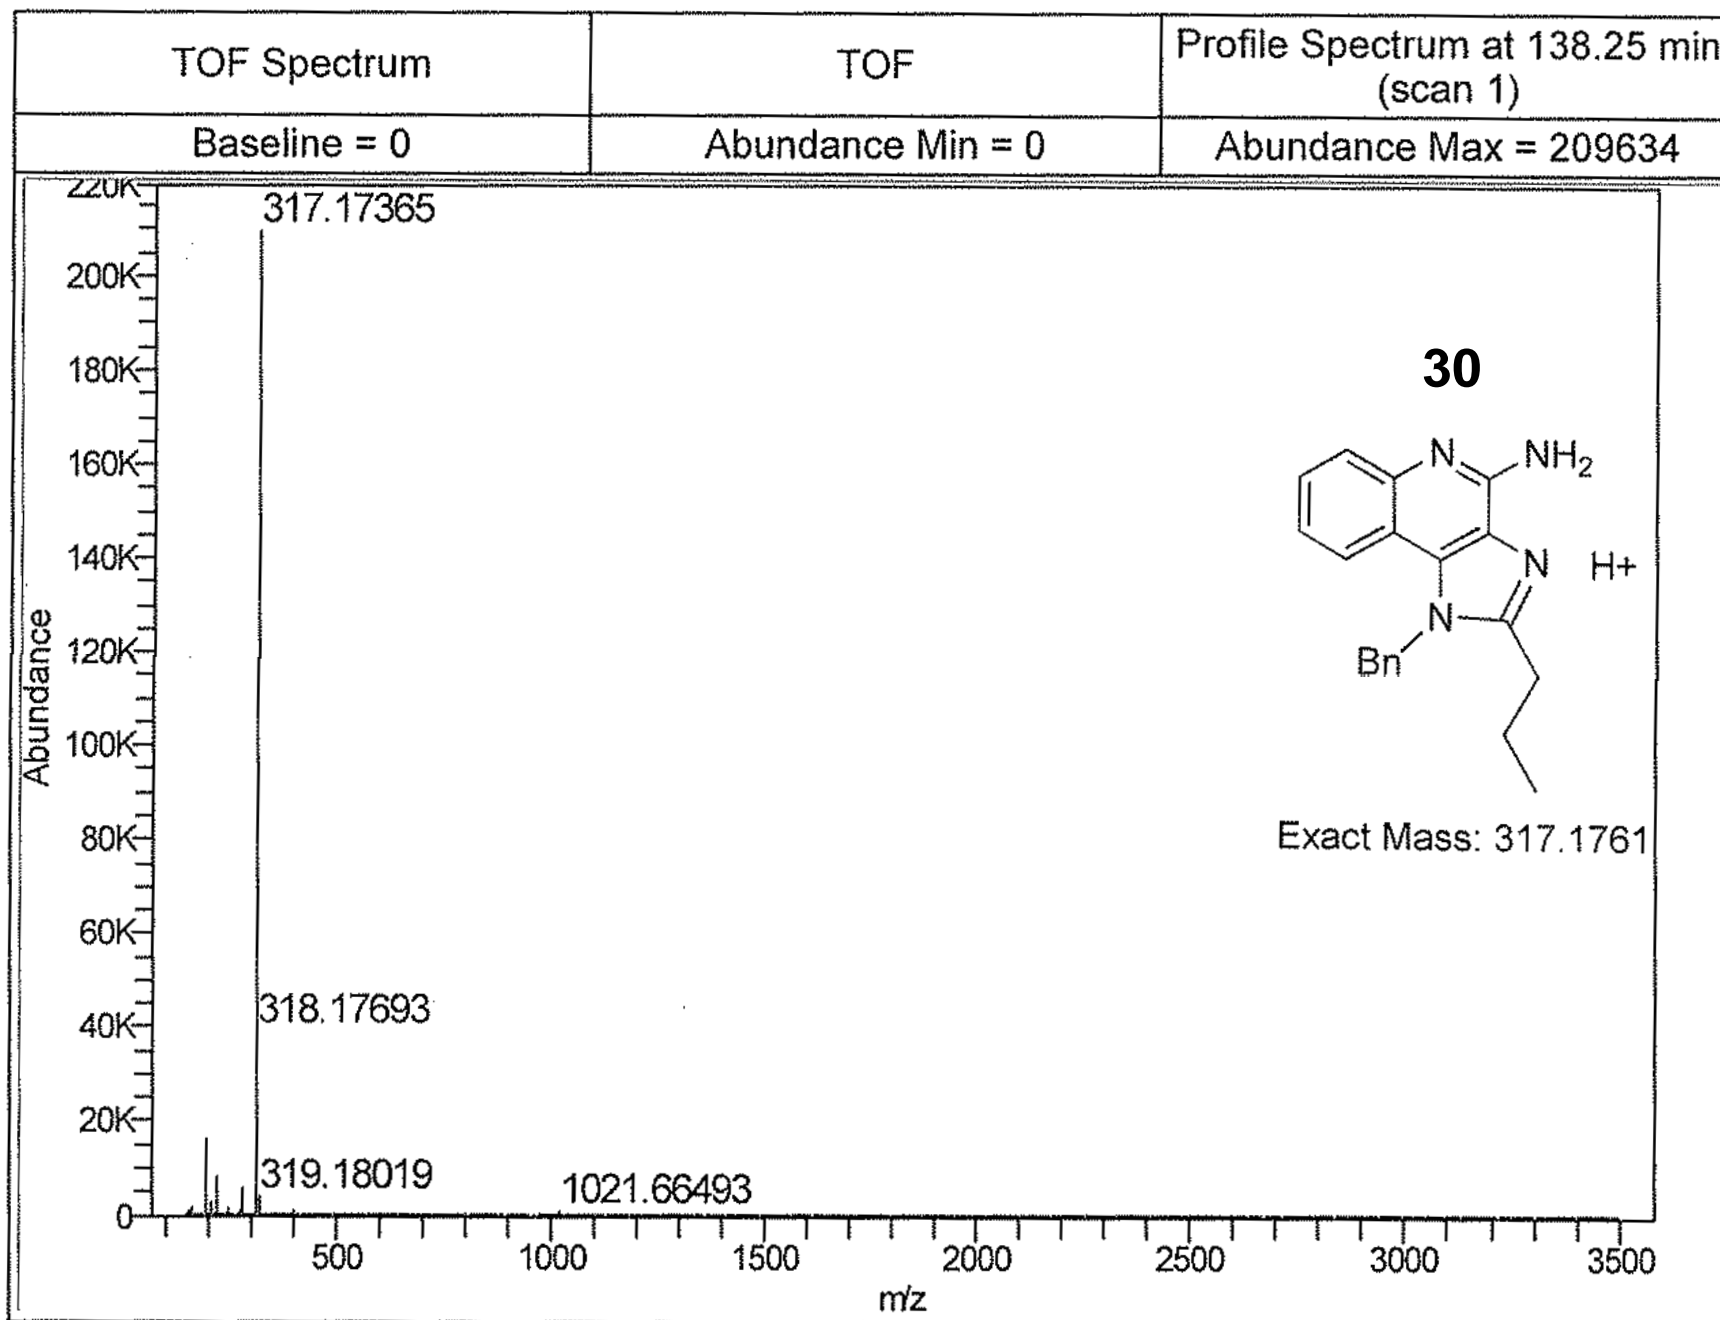

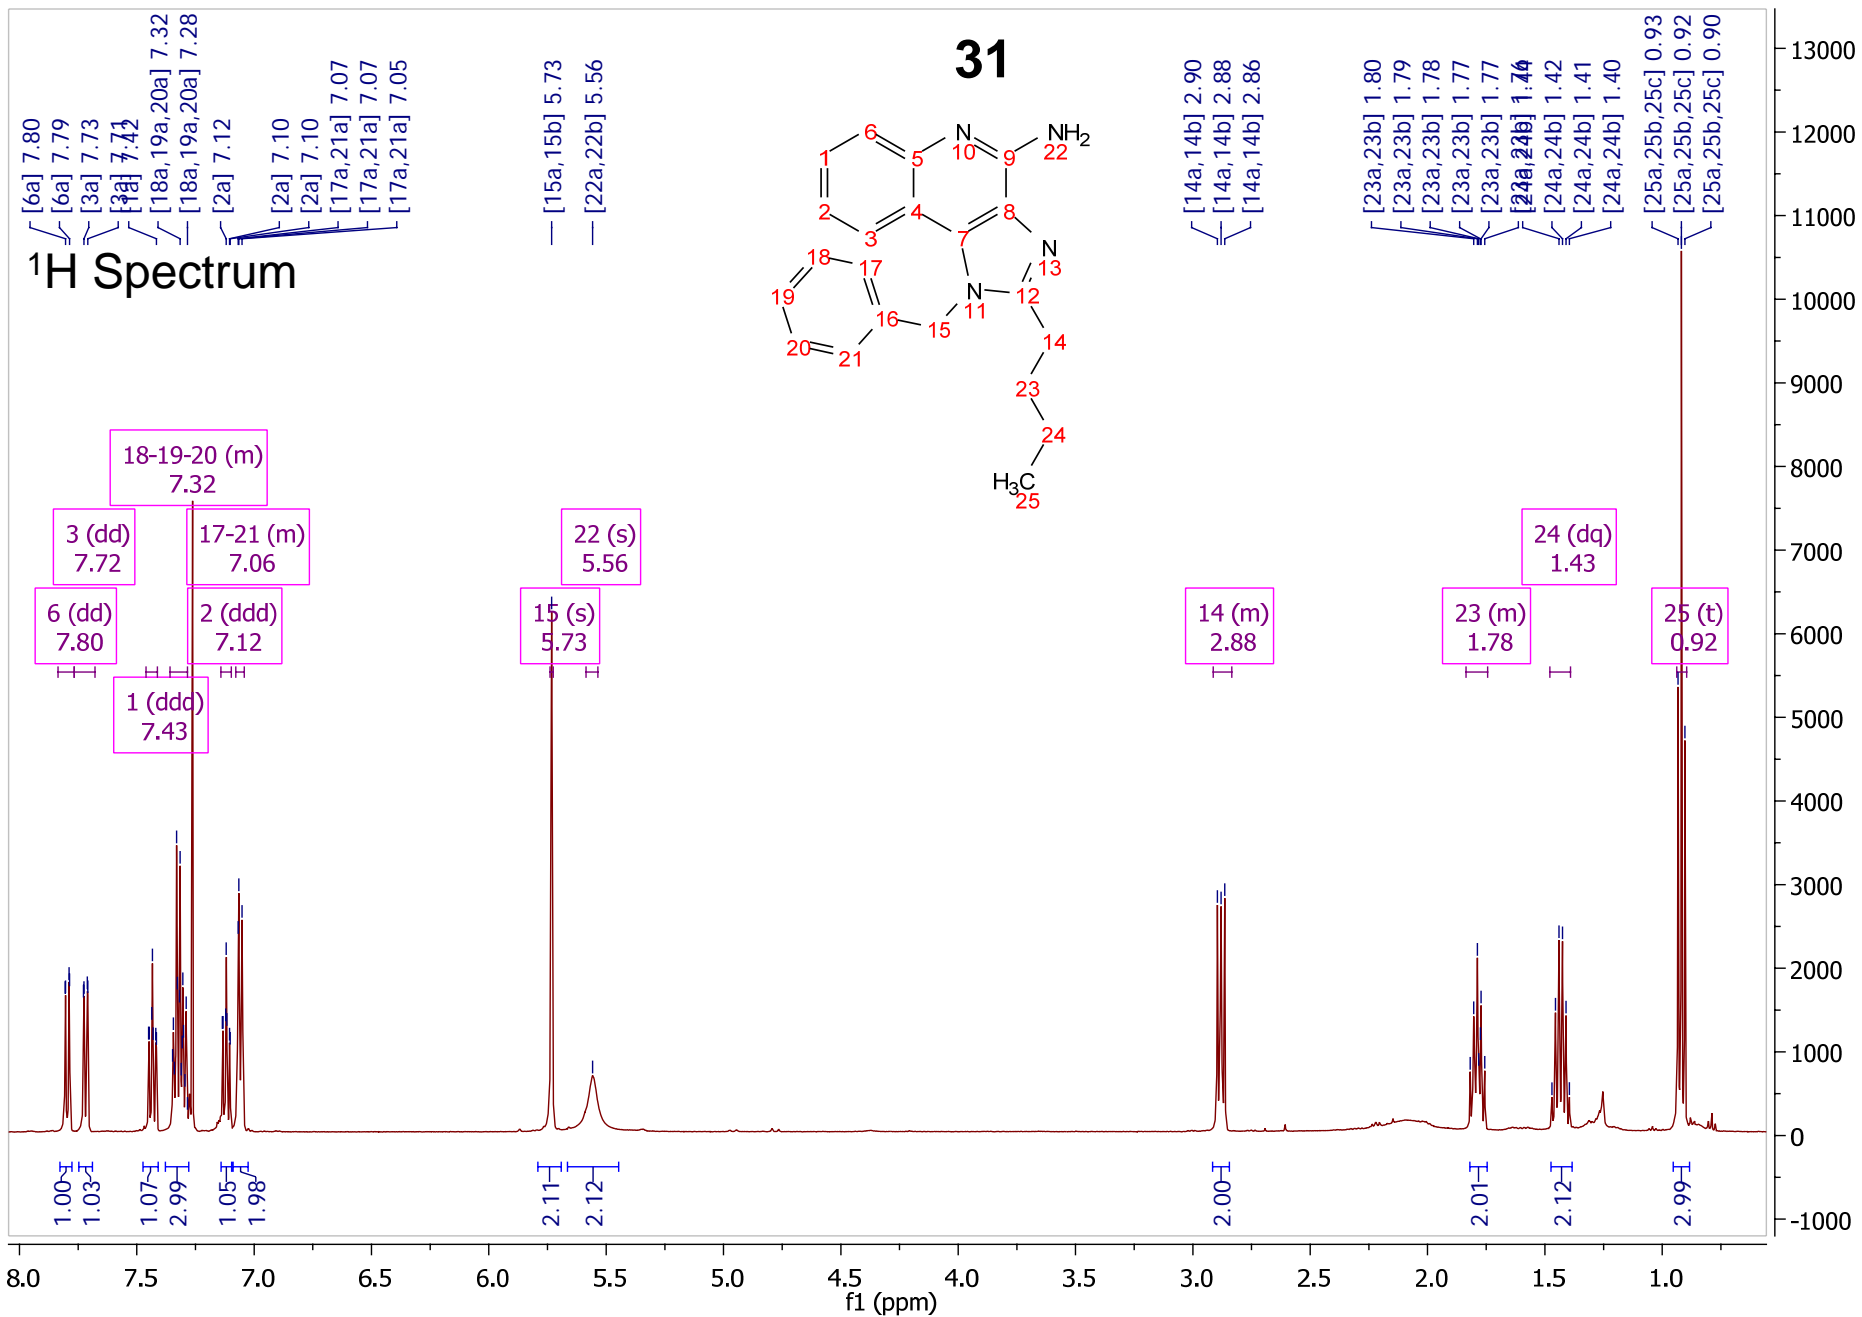



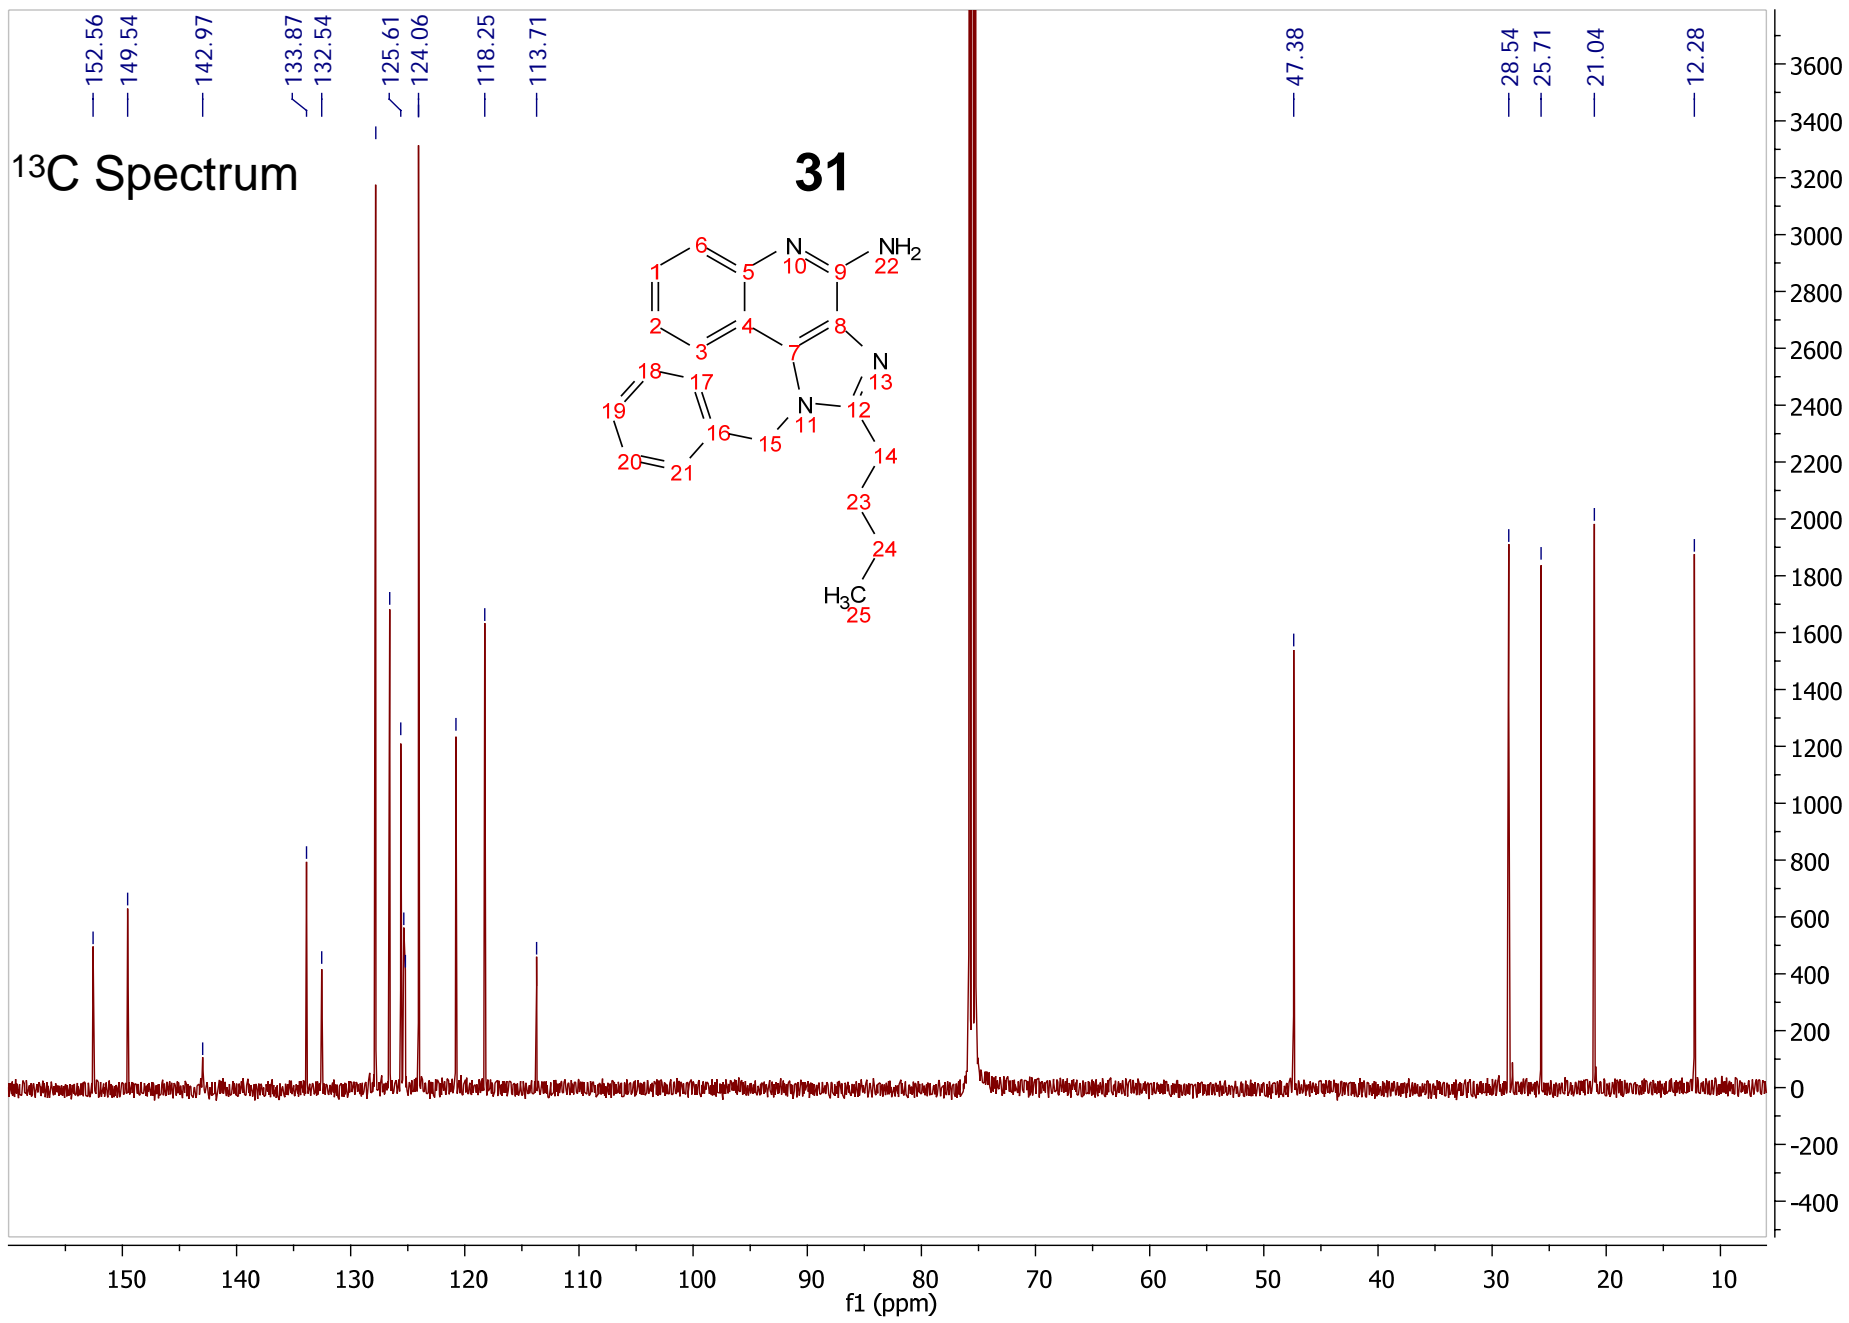

|              |                   |                                           |
|--------------|-------------------|-------------------------------------------|
| TOF Spectrum | TOF               | Profile Spectrum at 21824.52 min (scan 1) |
| Baseline = 0 | Abundance Min = 0 | Abundance Max = 276688                    |

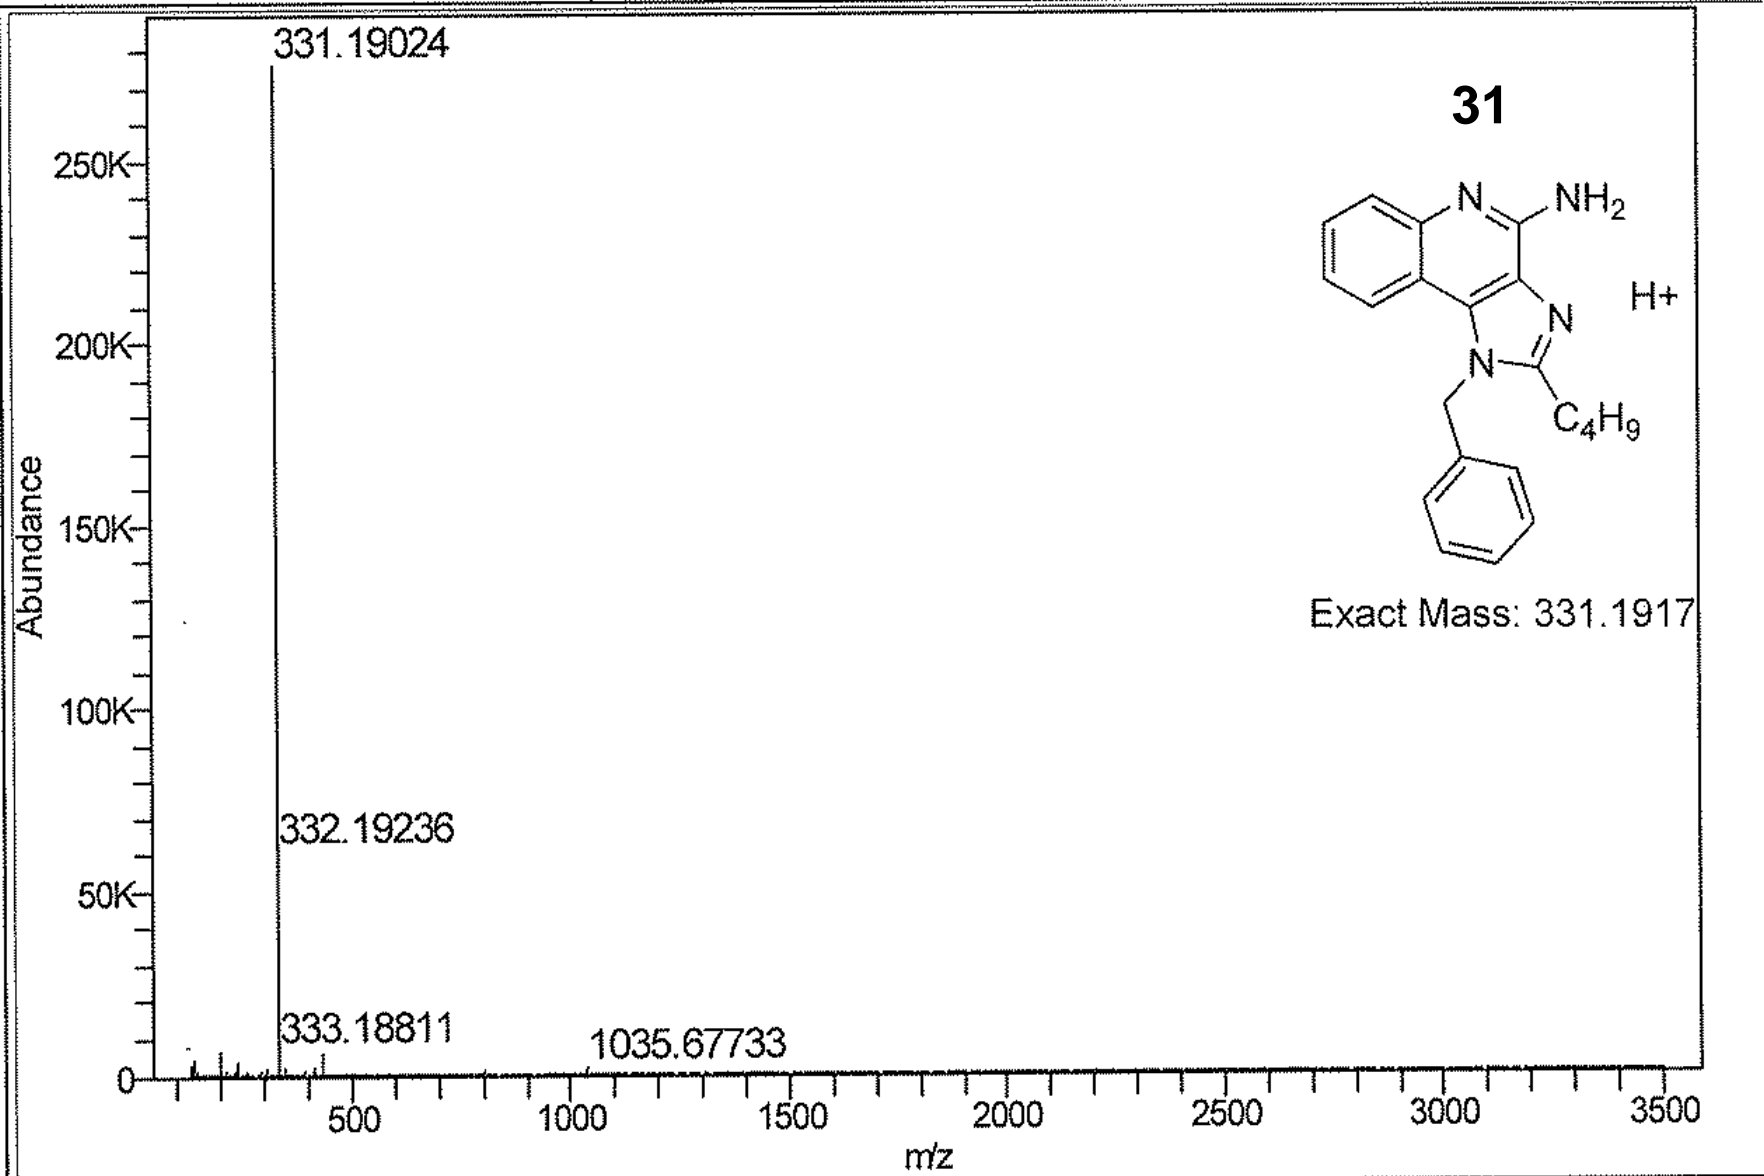

# <sup>1</sup>H Spectrum

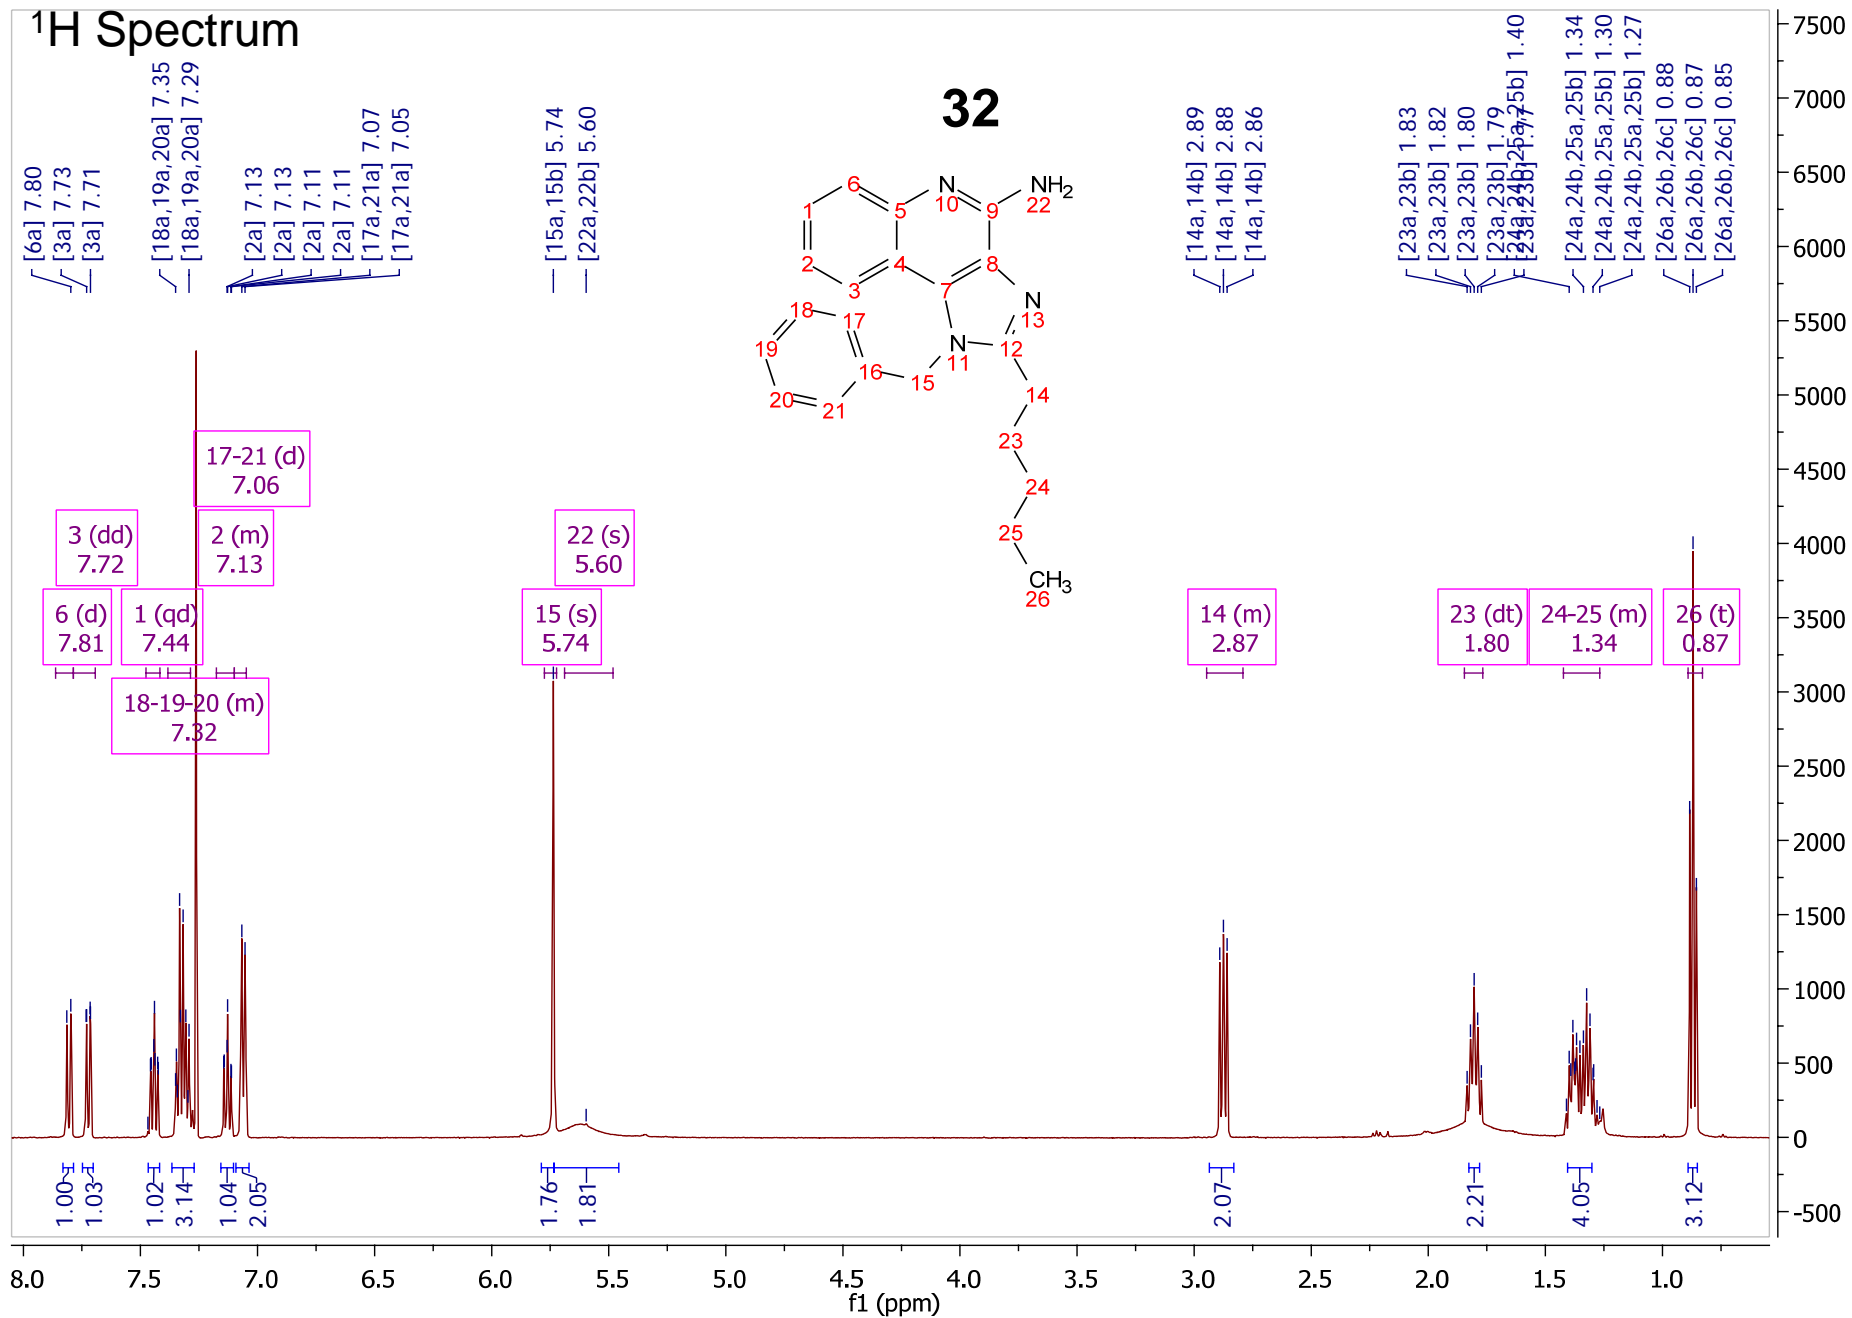

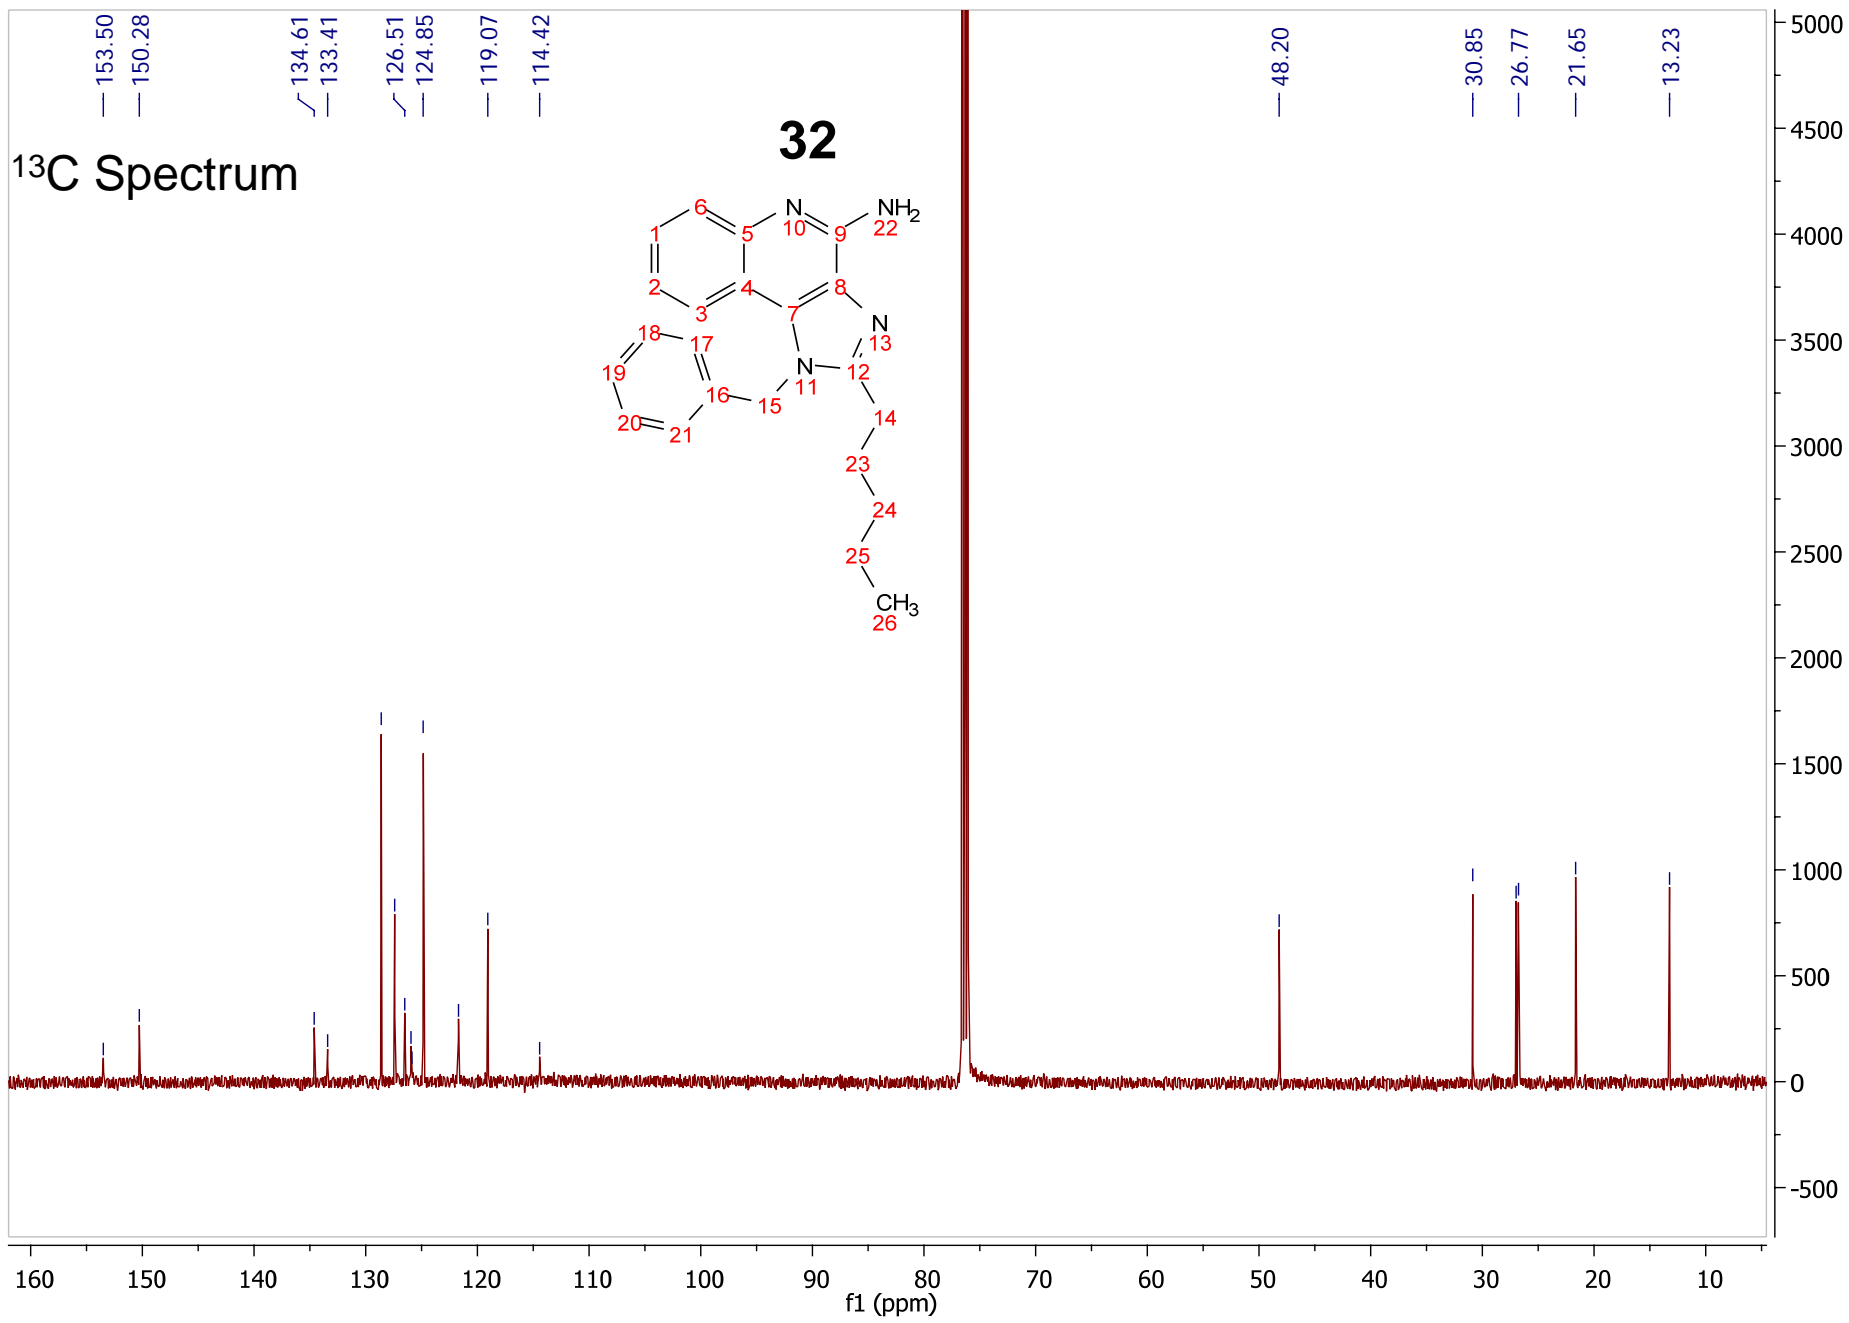

# 2D-NOESY Spectrum

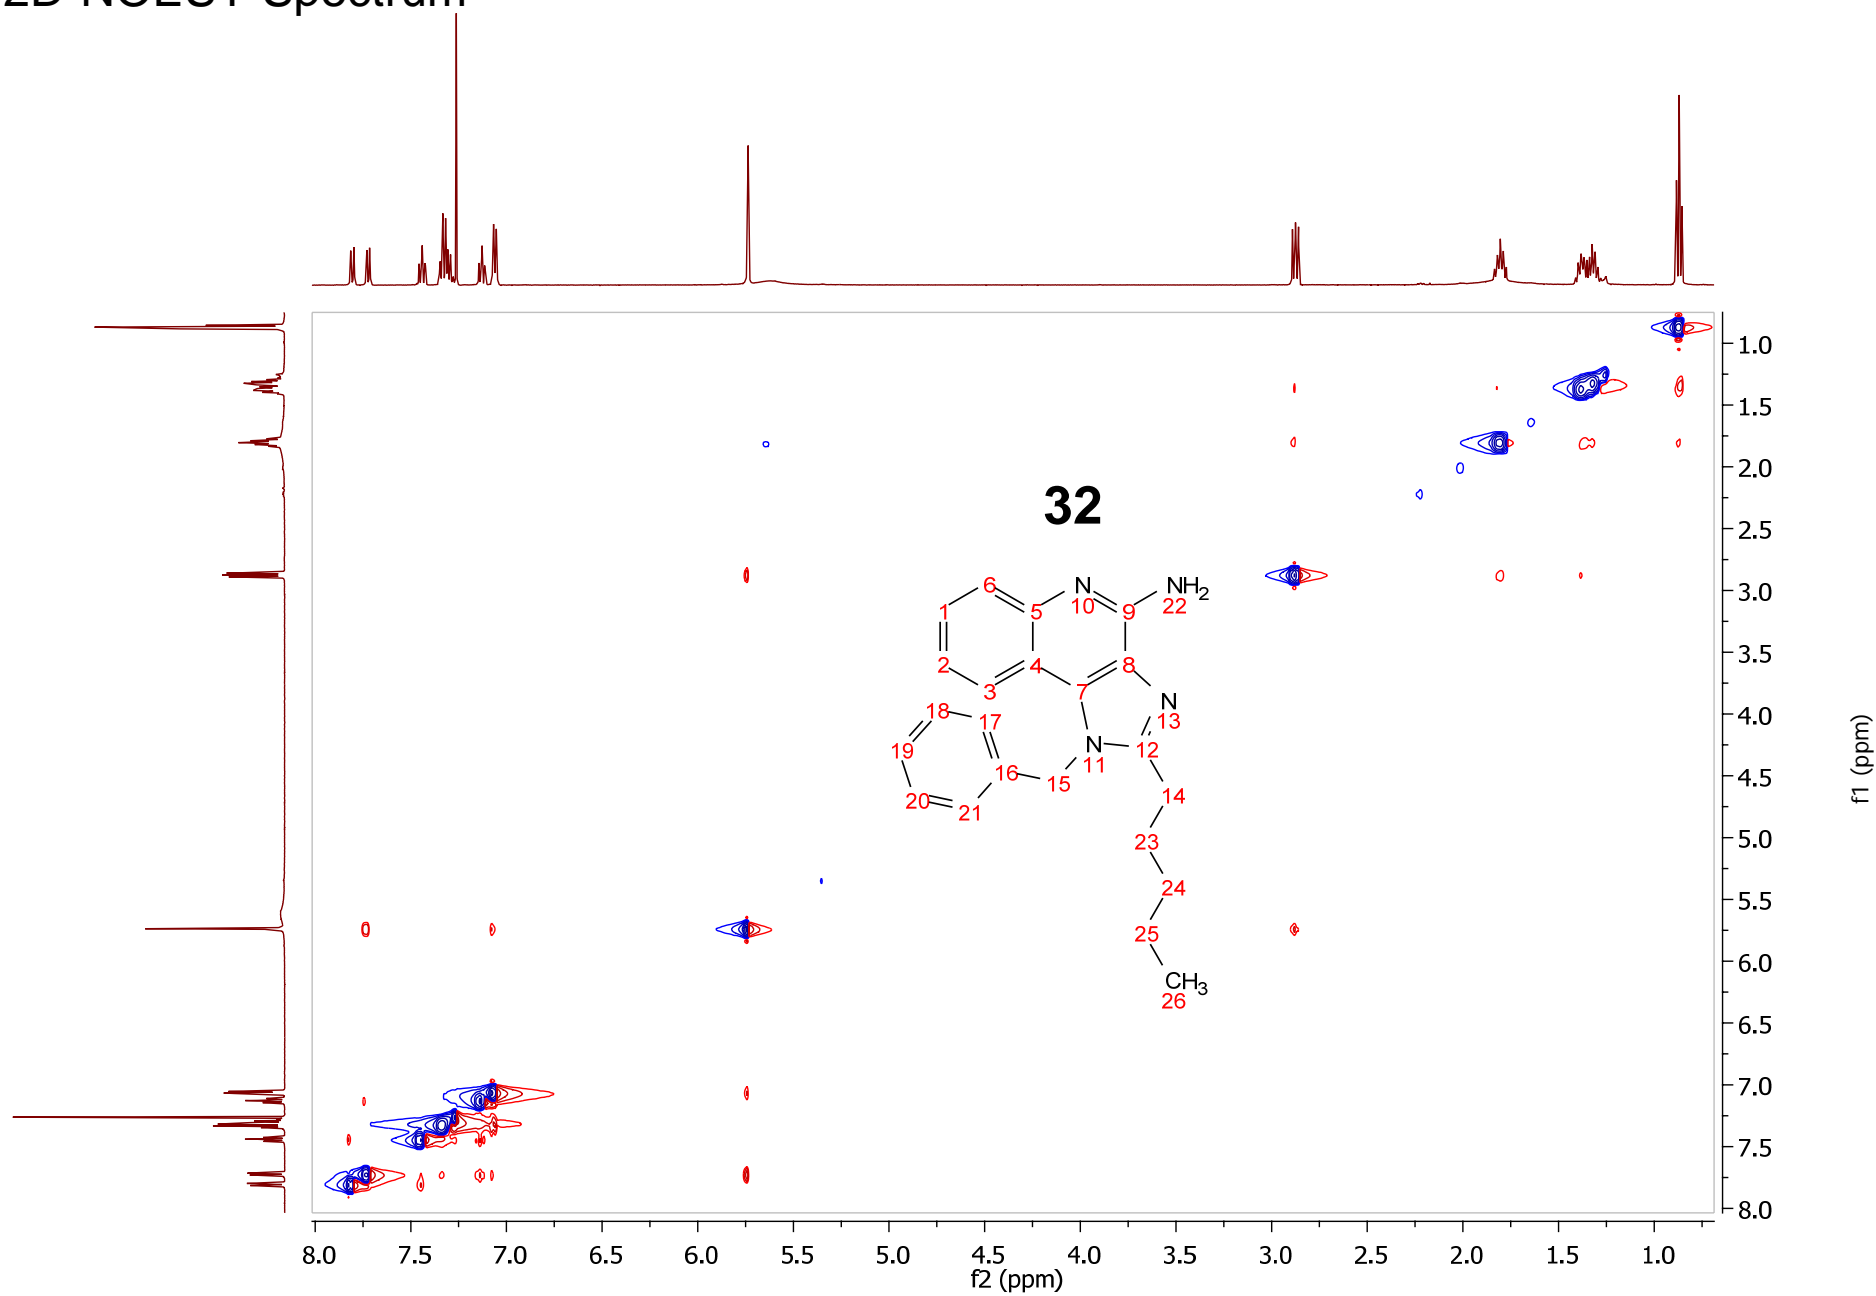

# Aromatic Region of the 2D-NOESY Spectrum of the Compound **32**

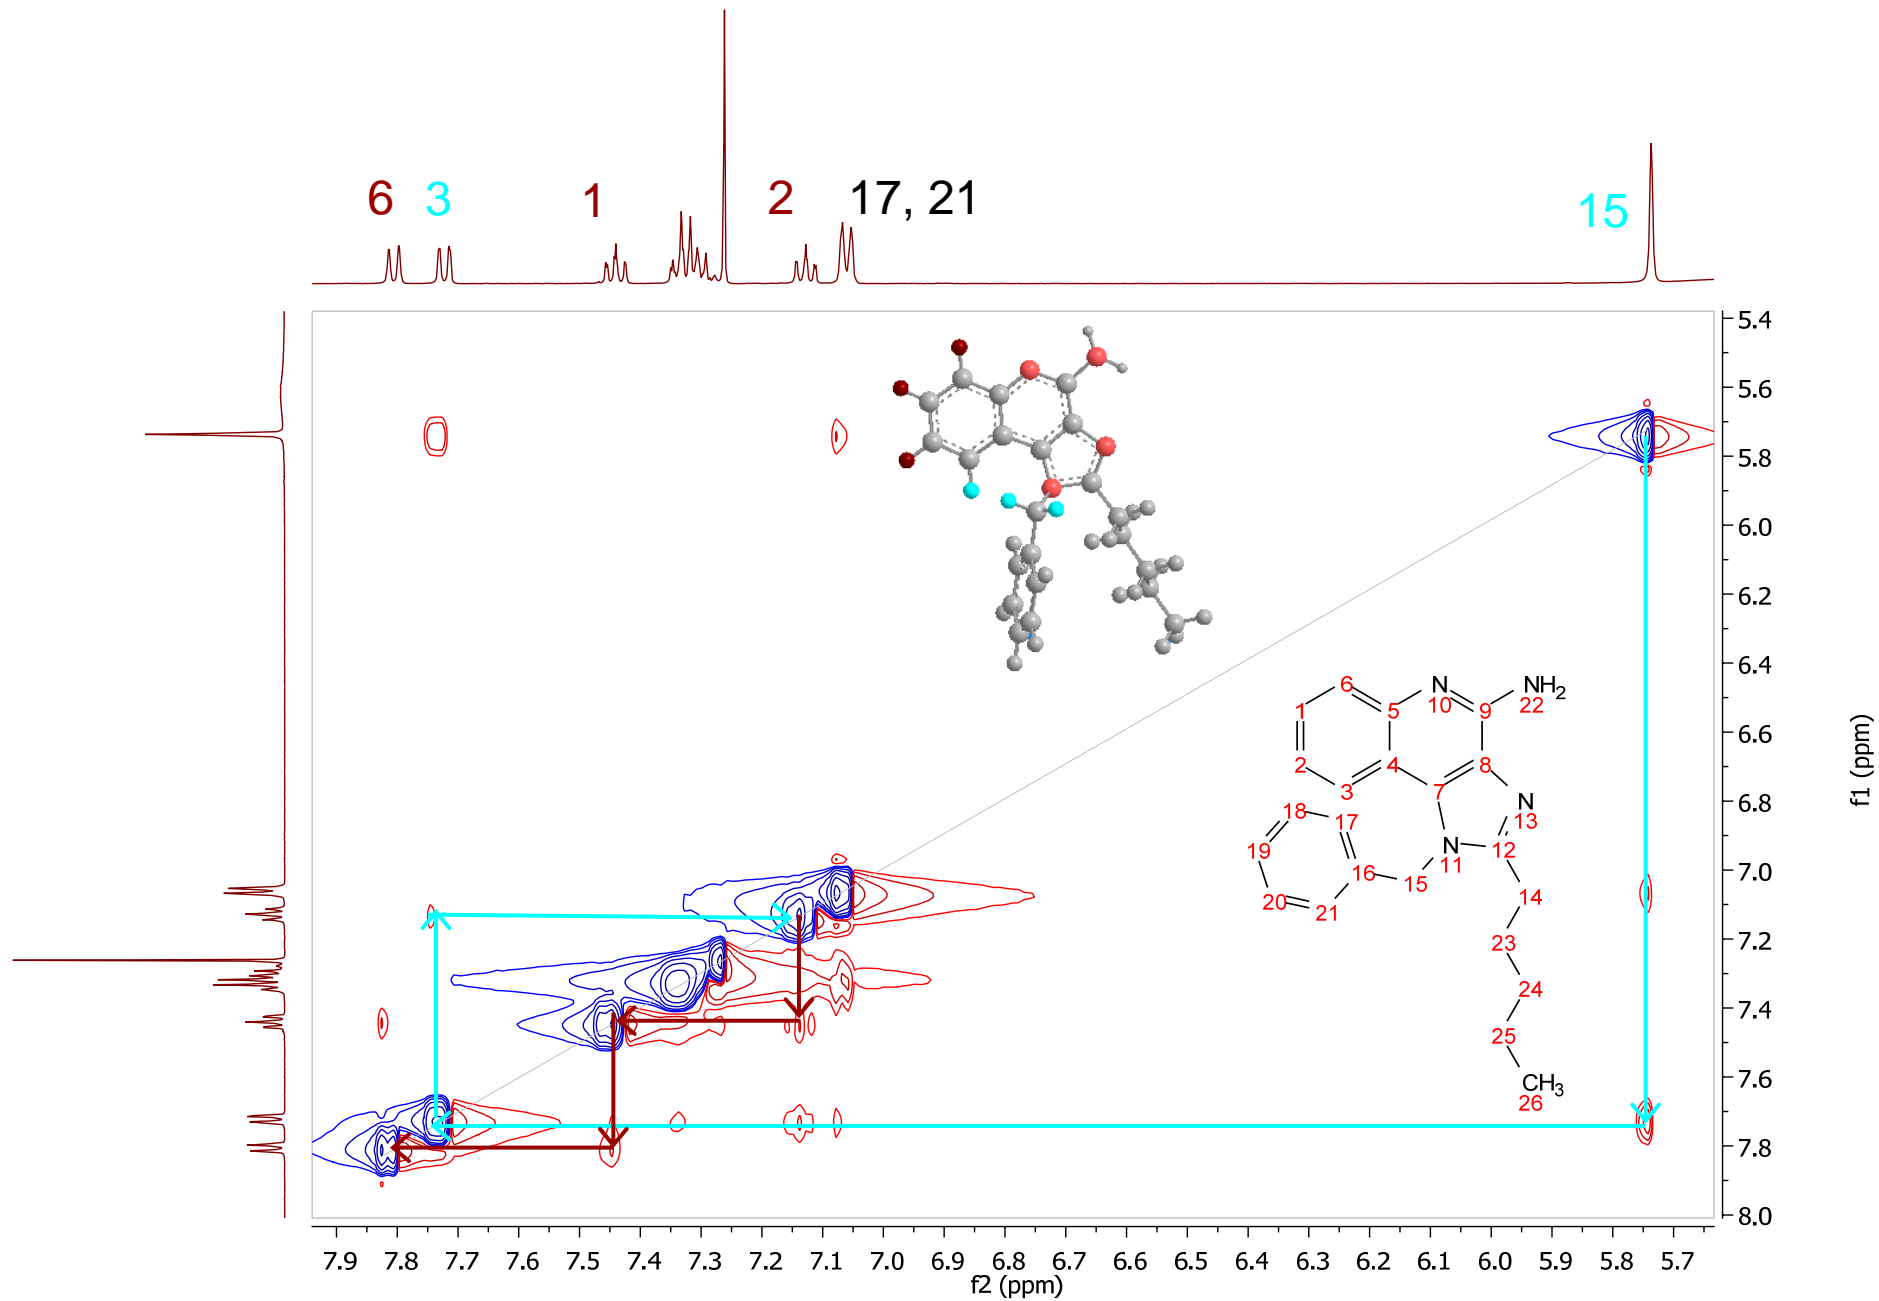

# 2D-COSY Spectrum

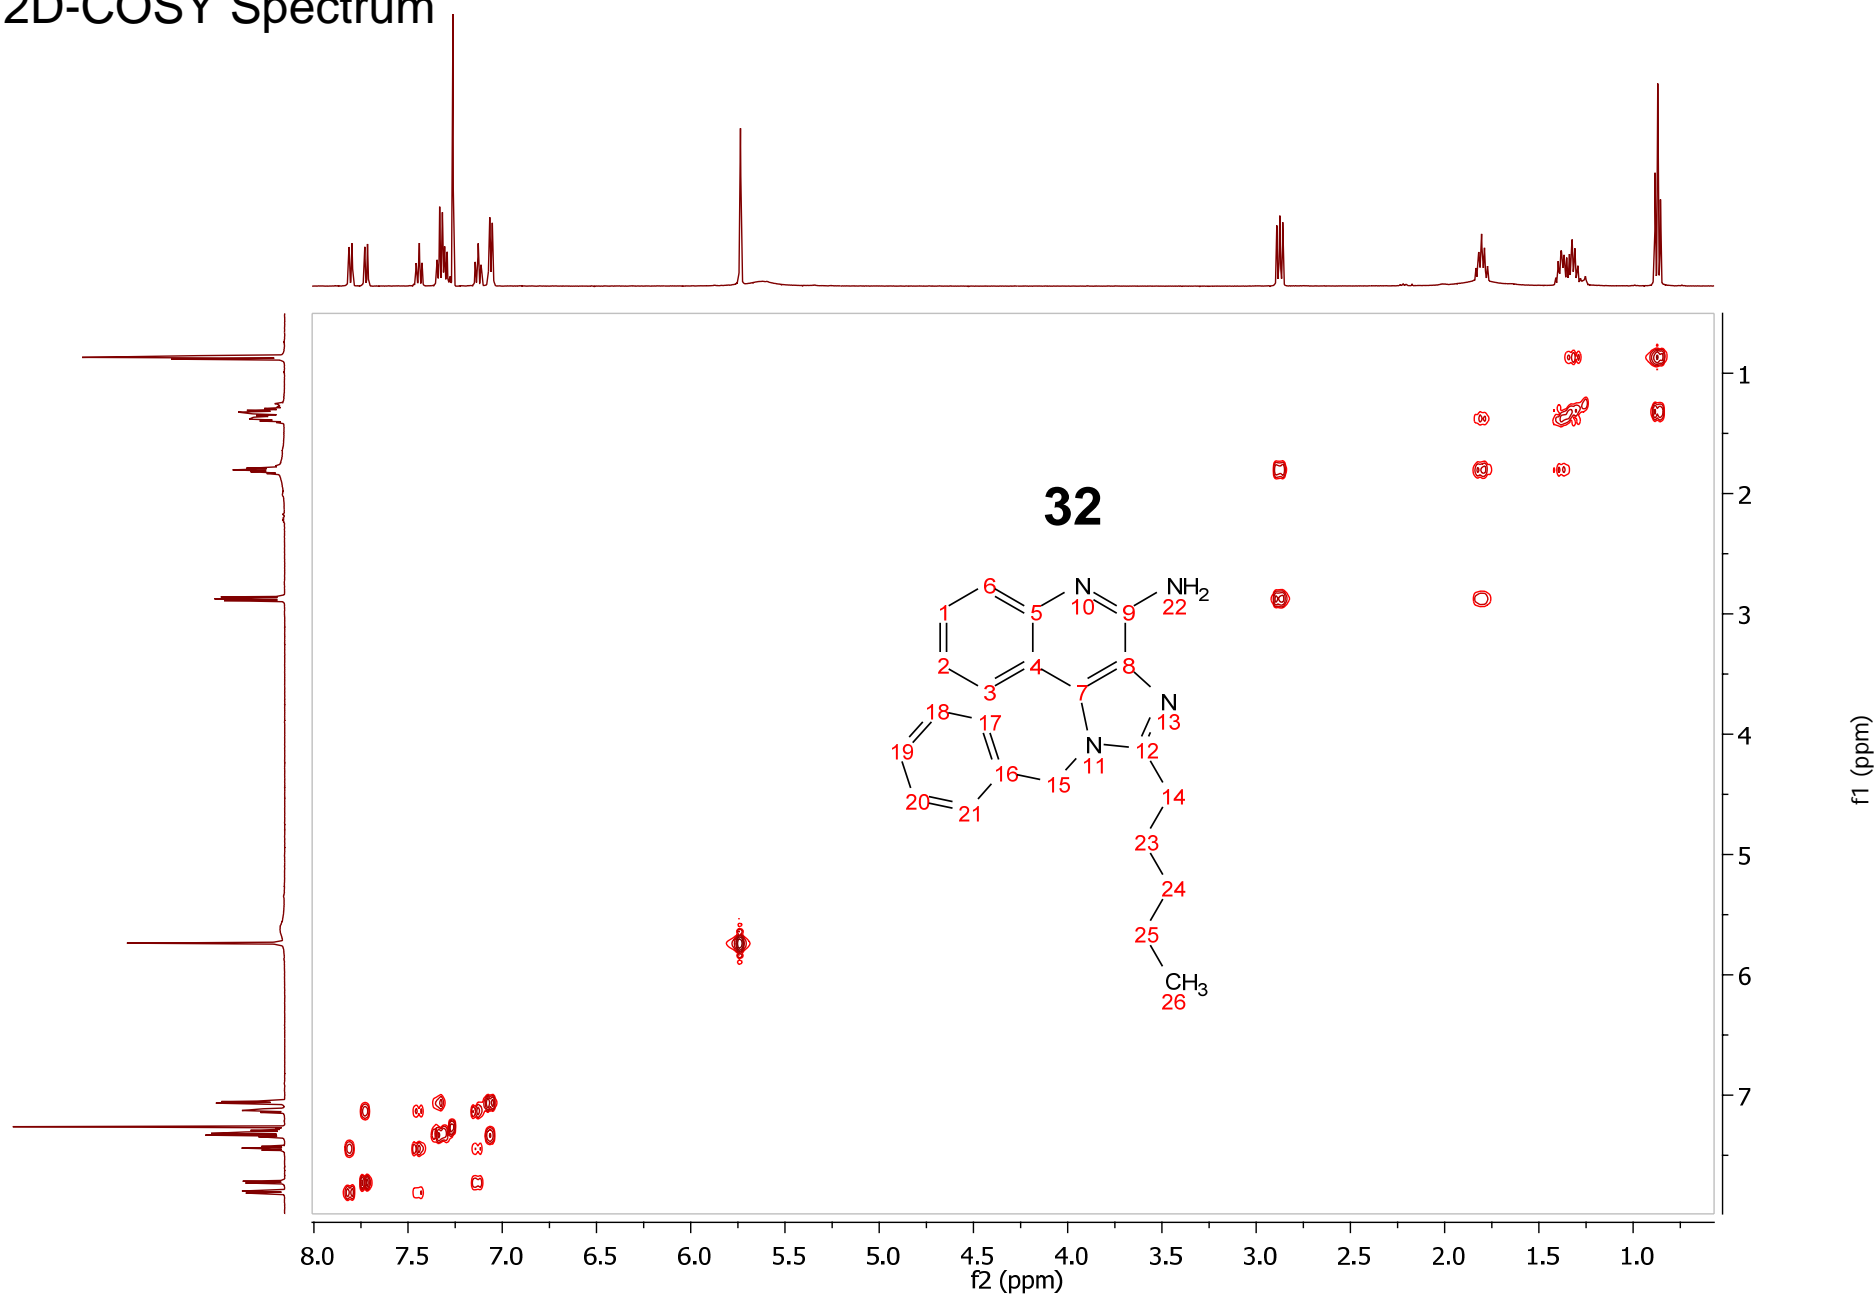

# Aromatic Region of the 2D-COSY Spectrum of the Compound **32**

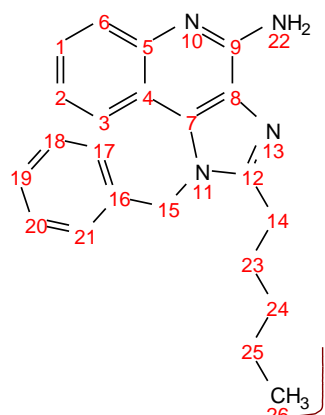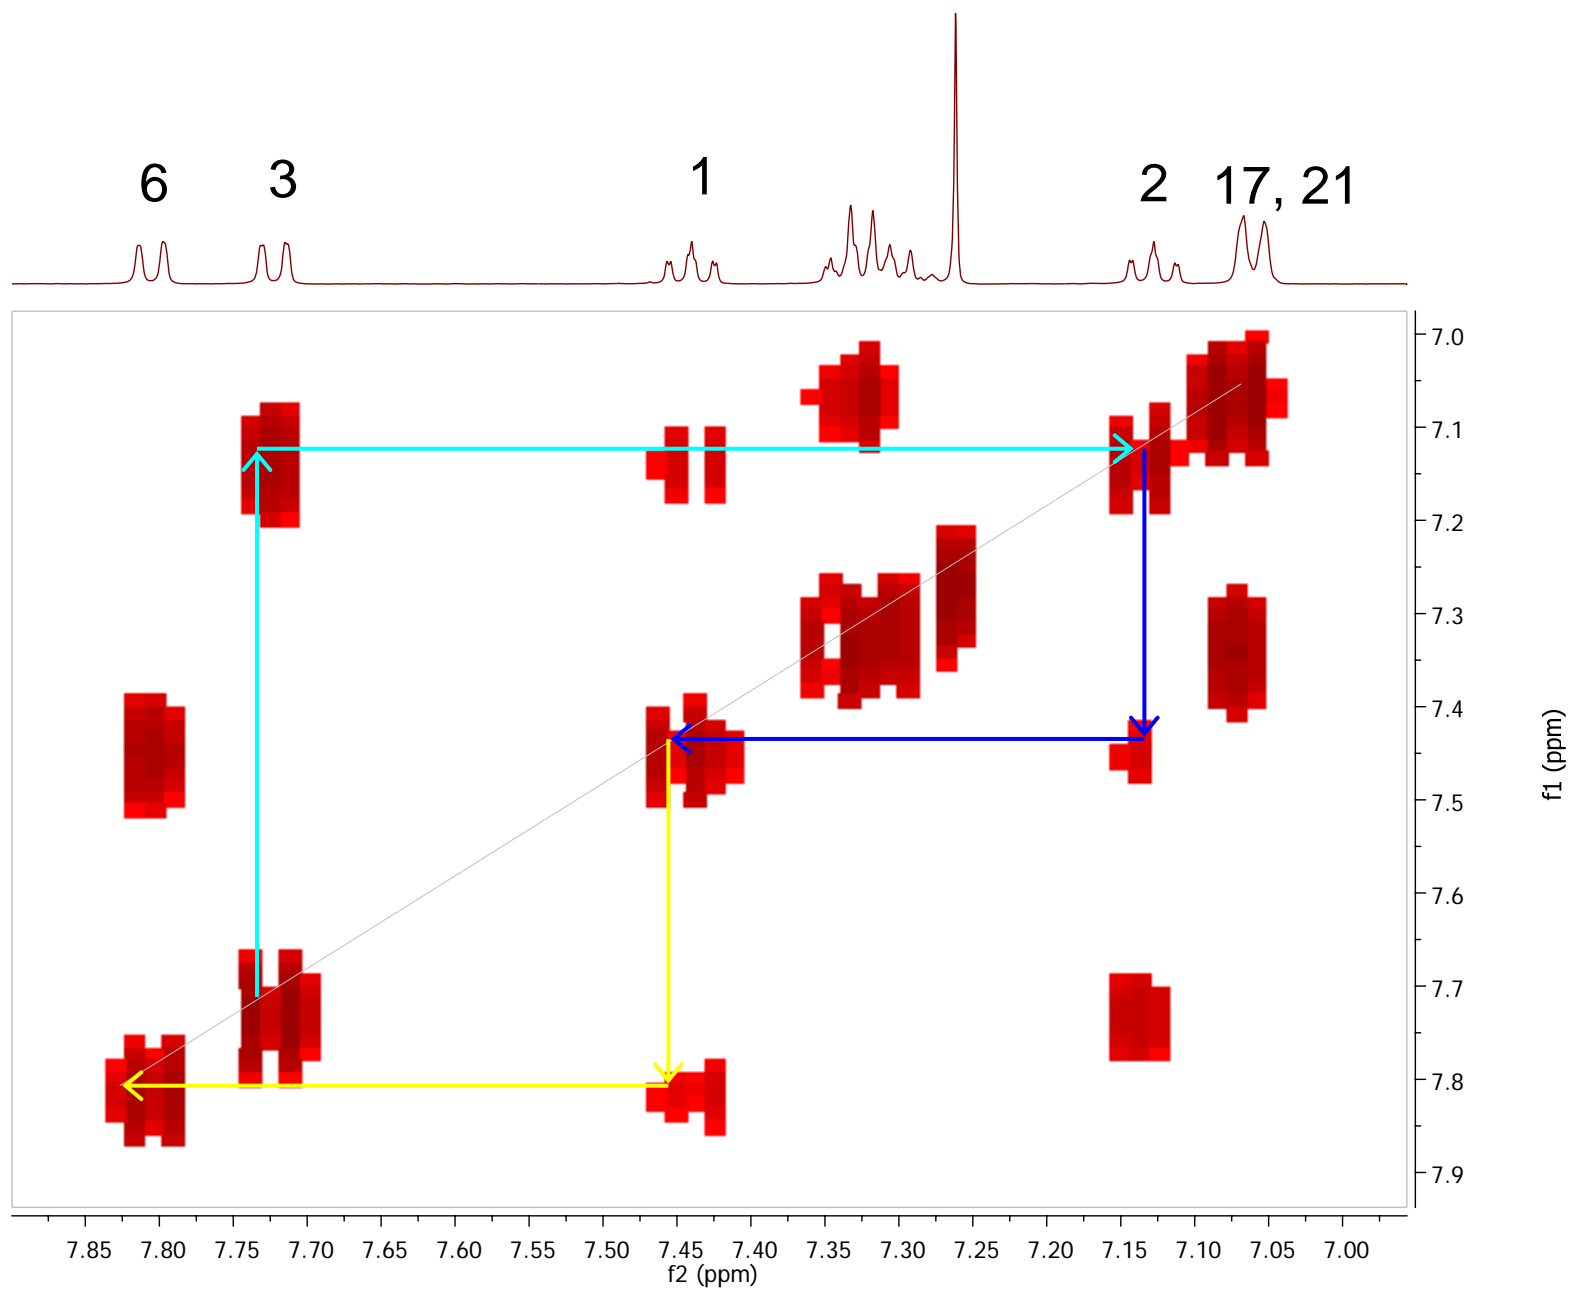



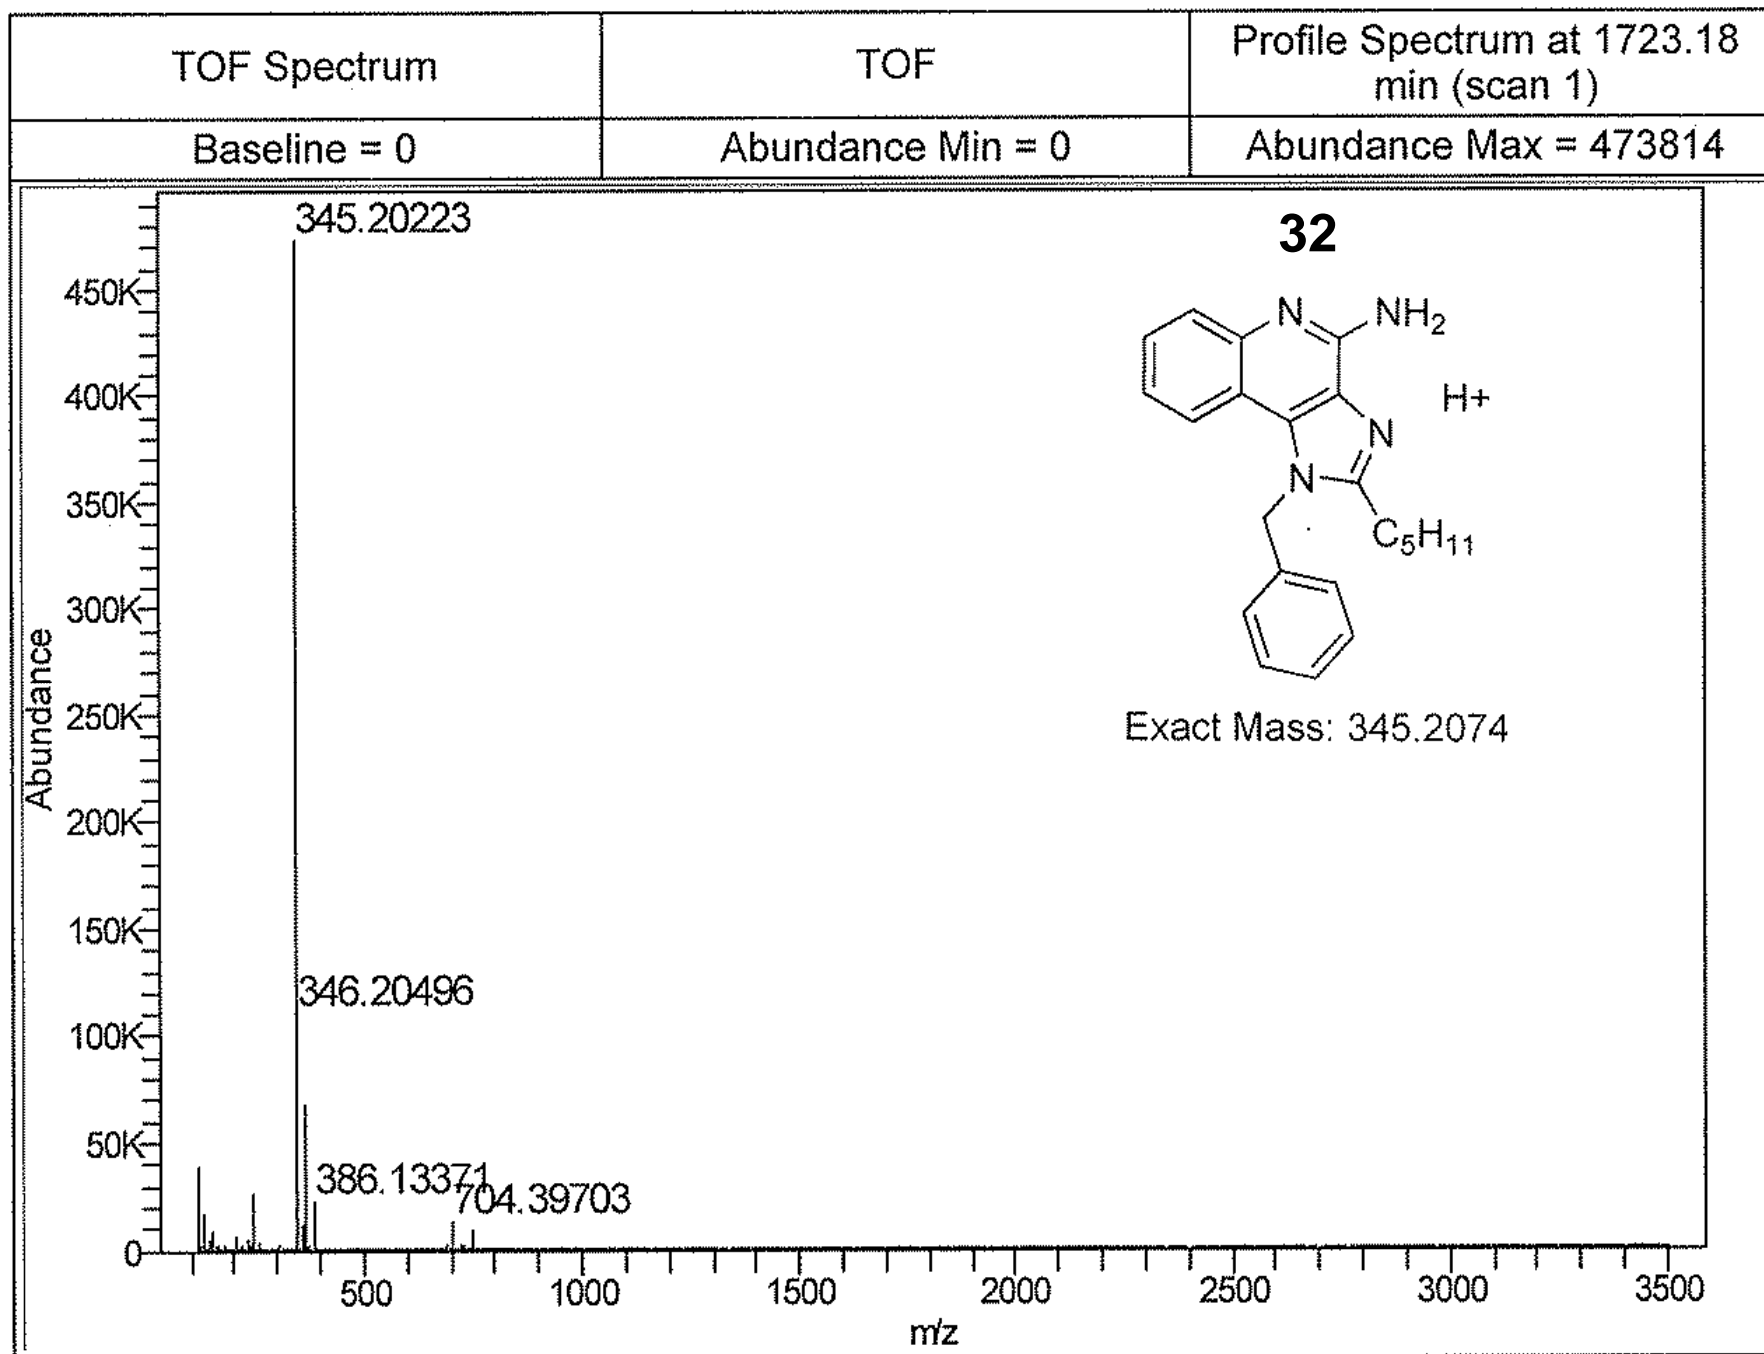

# <sup>1</sup>H Spectrum

**33**

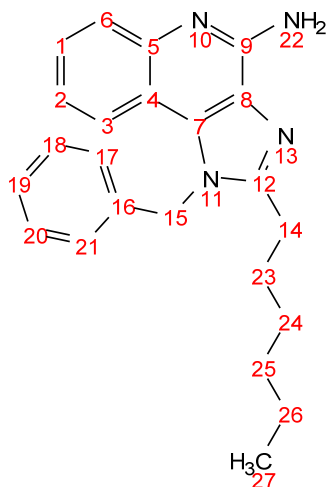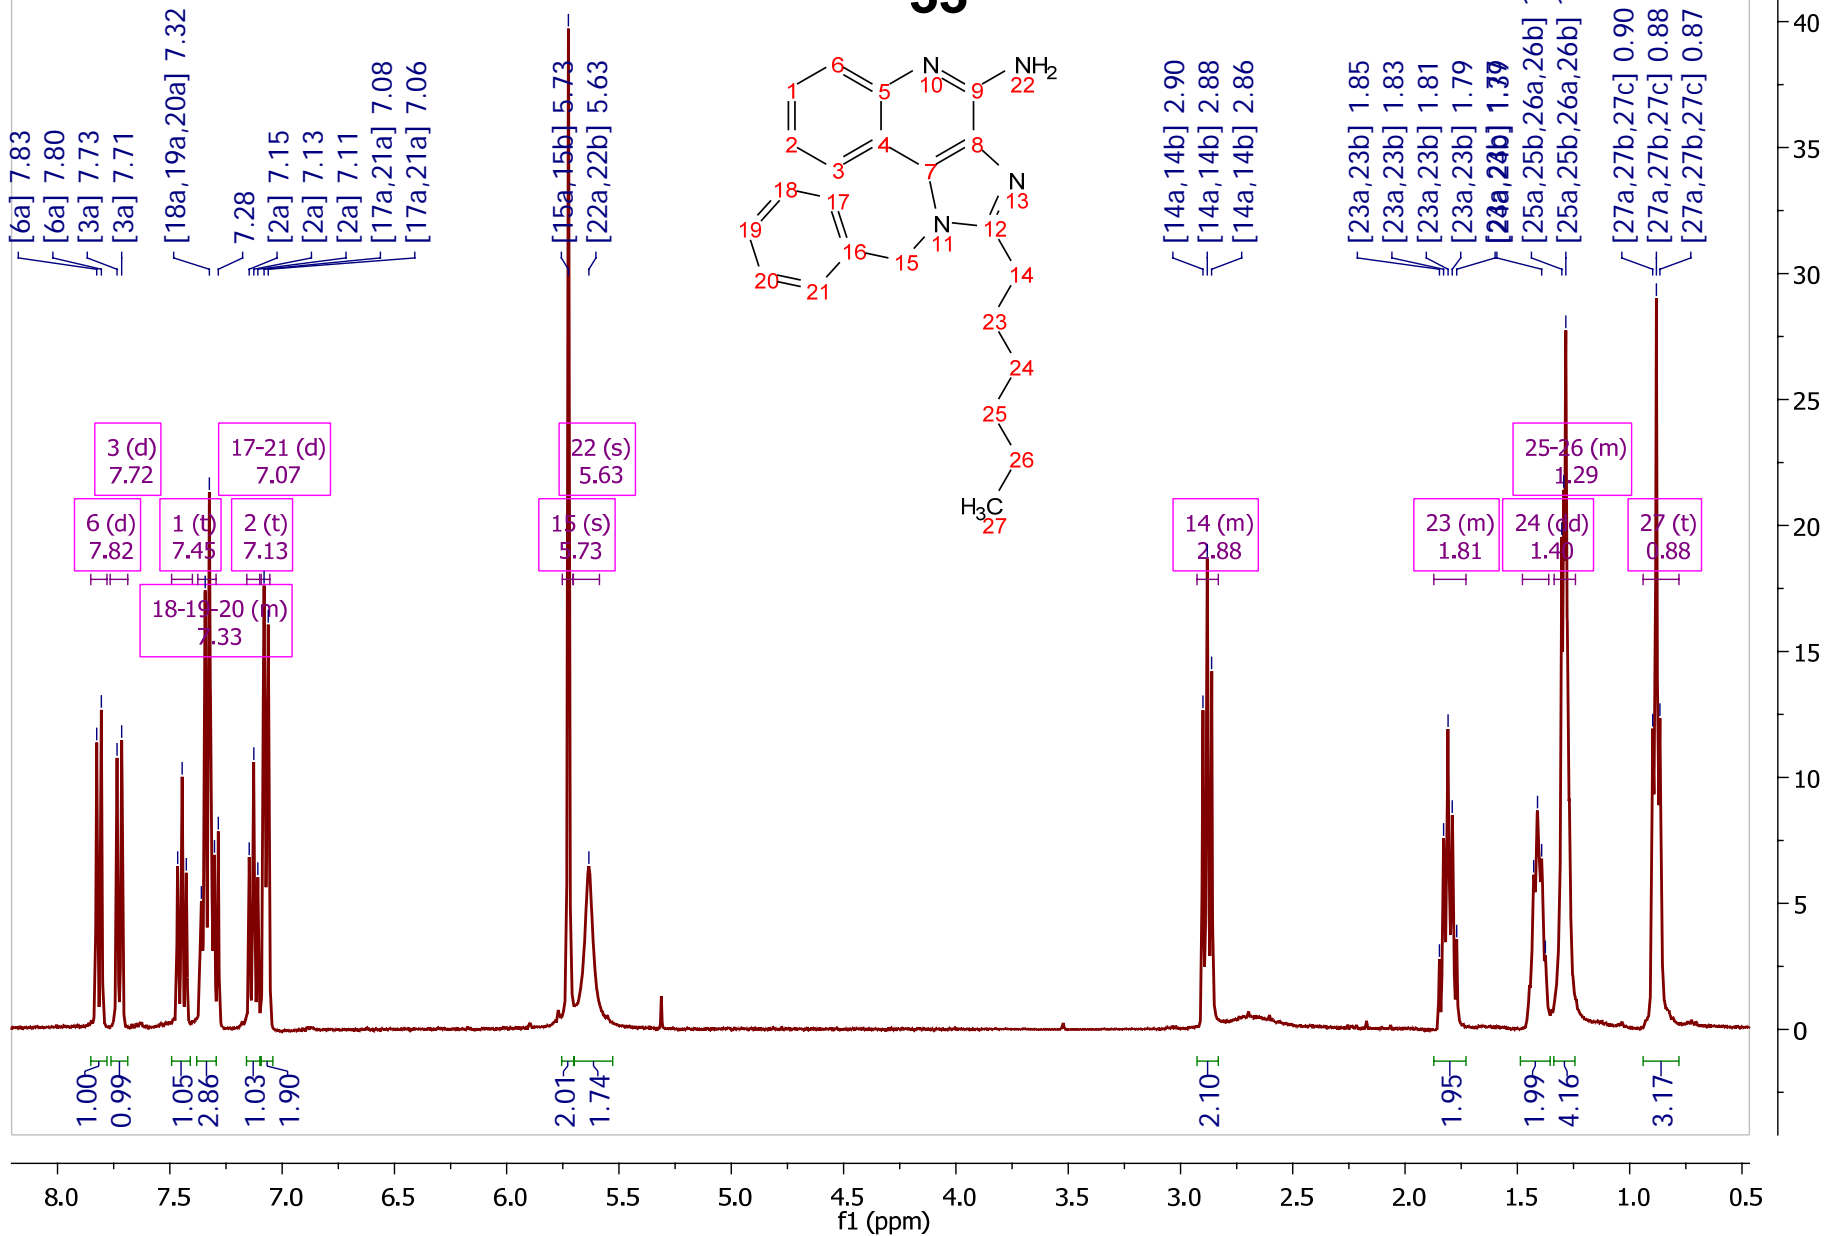

# <sup>13</sup>C Spectrum

**33**

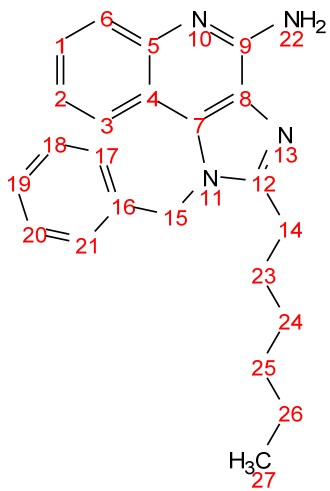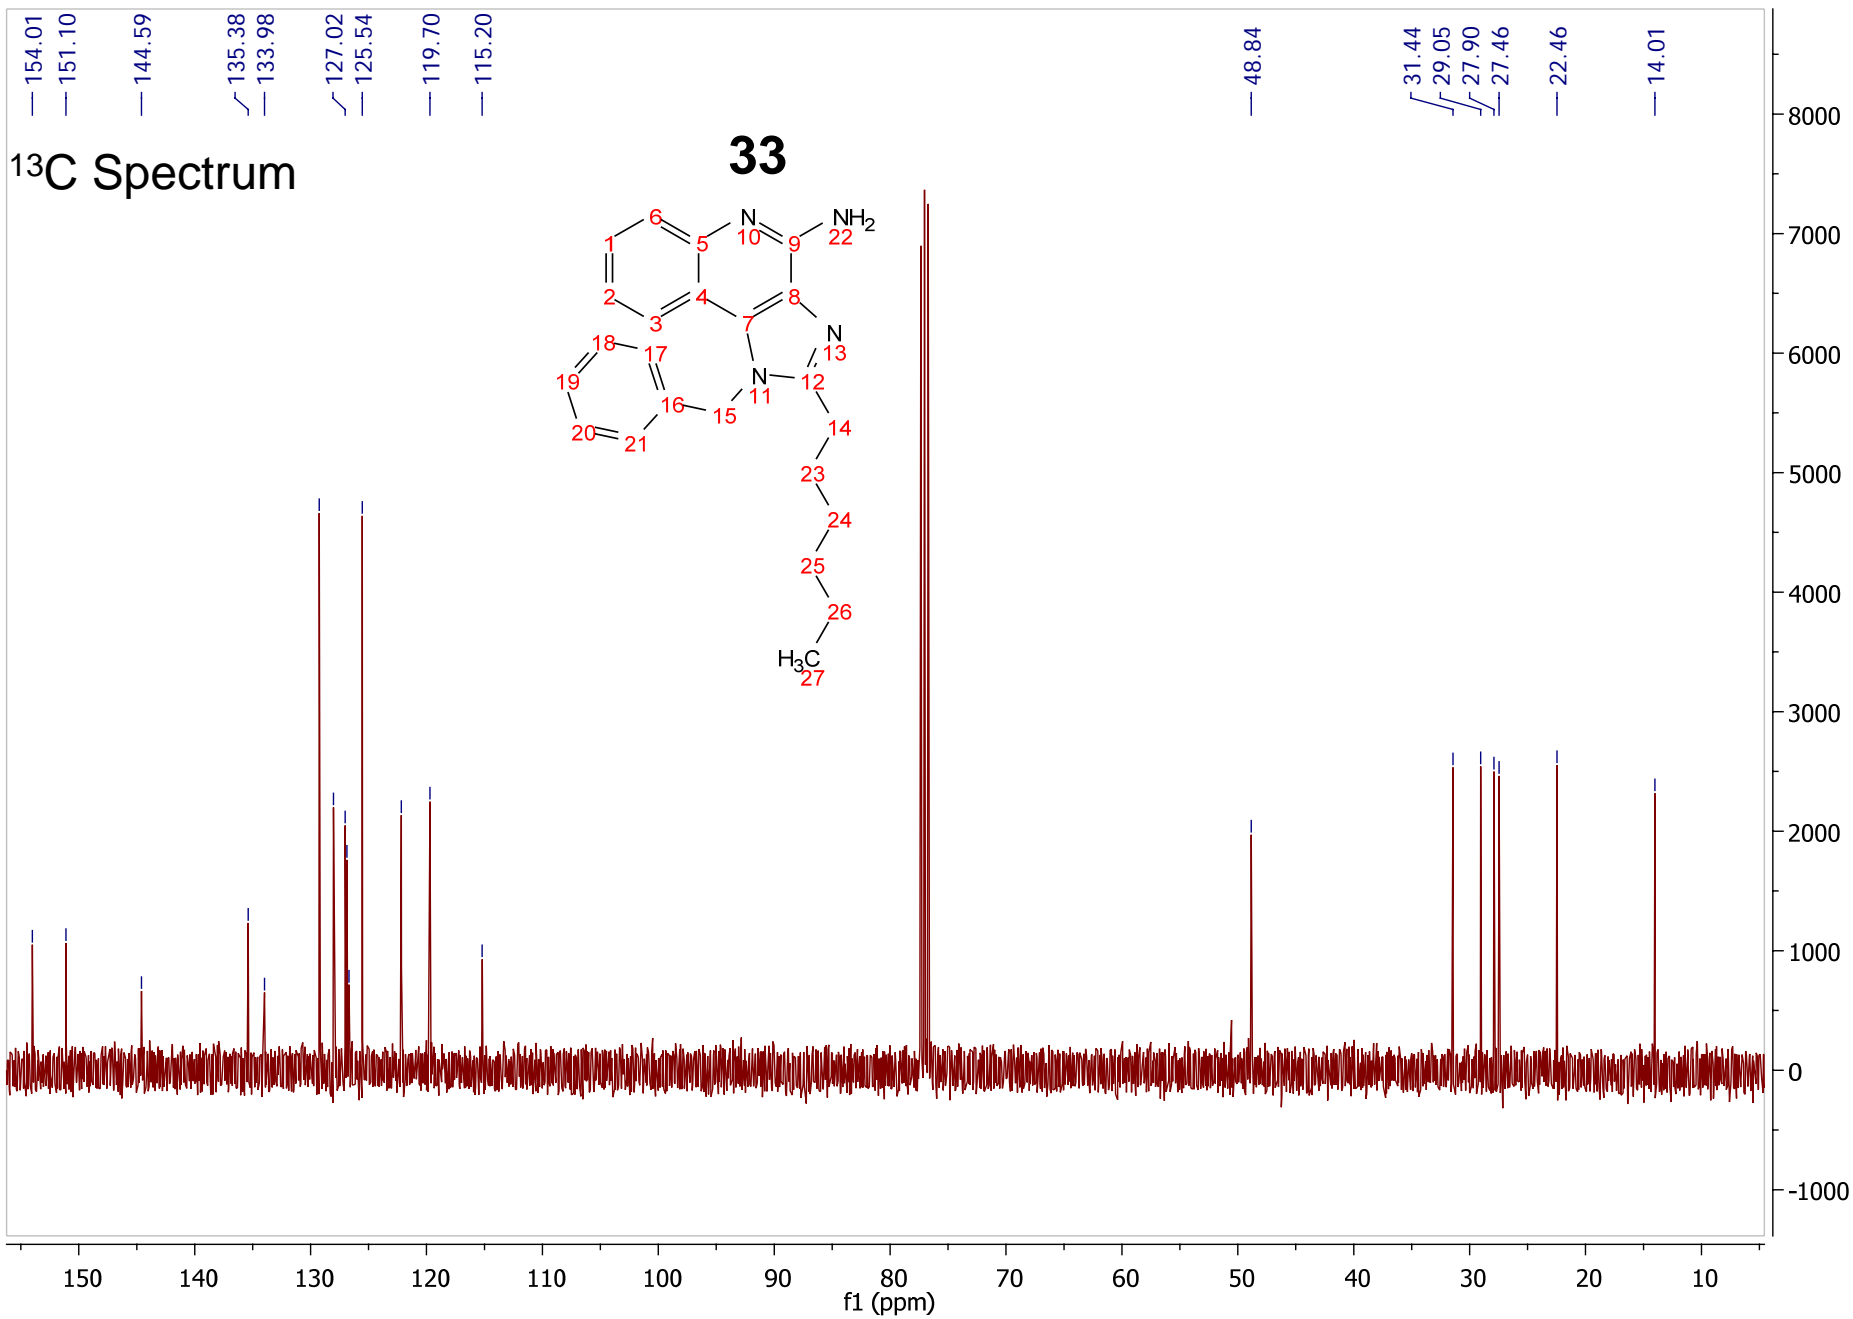

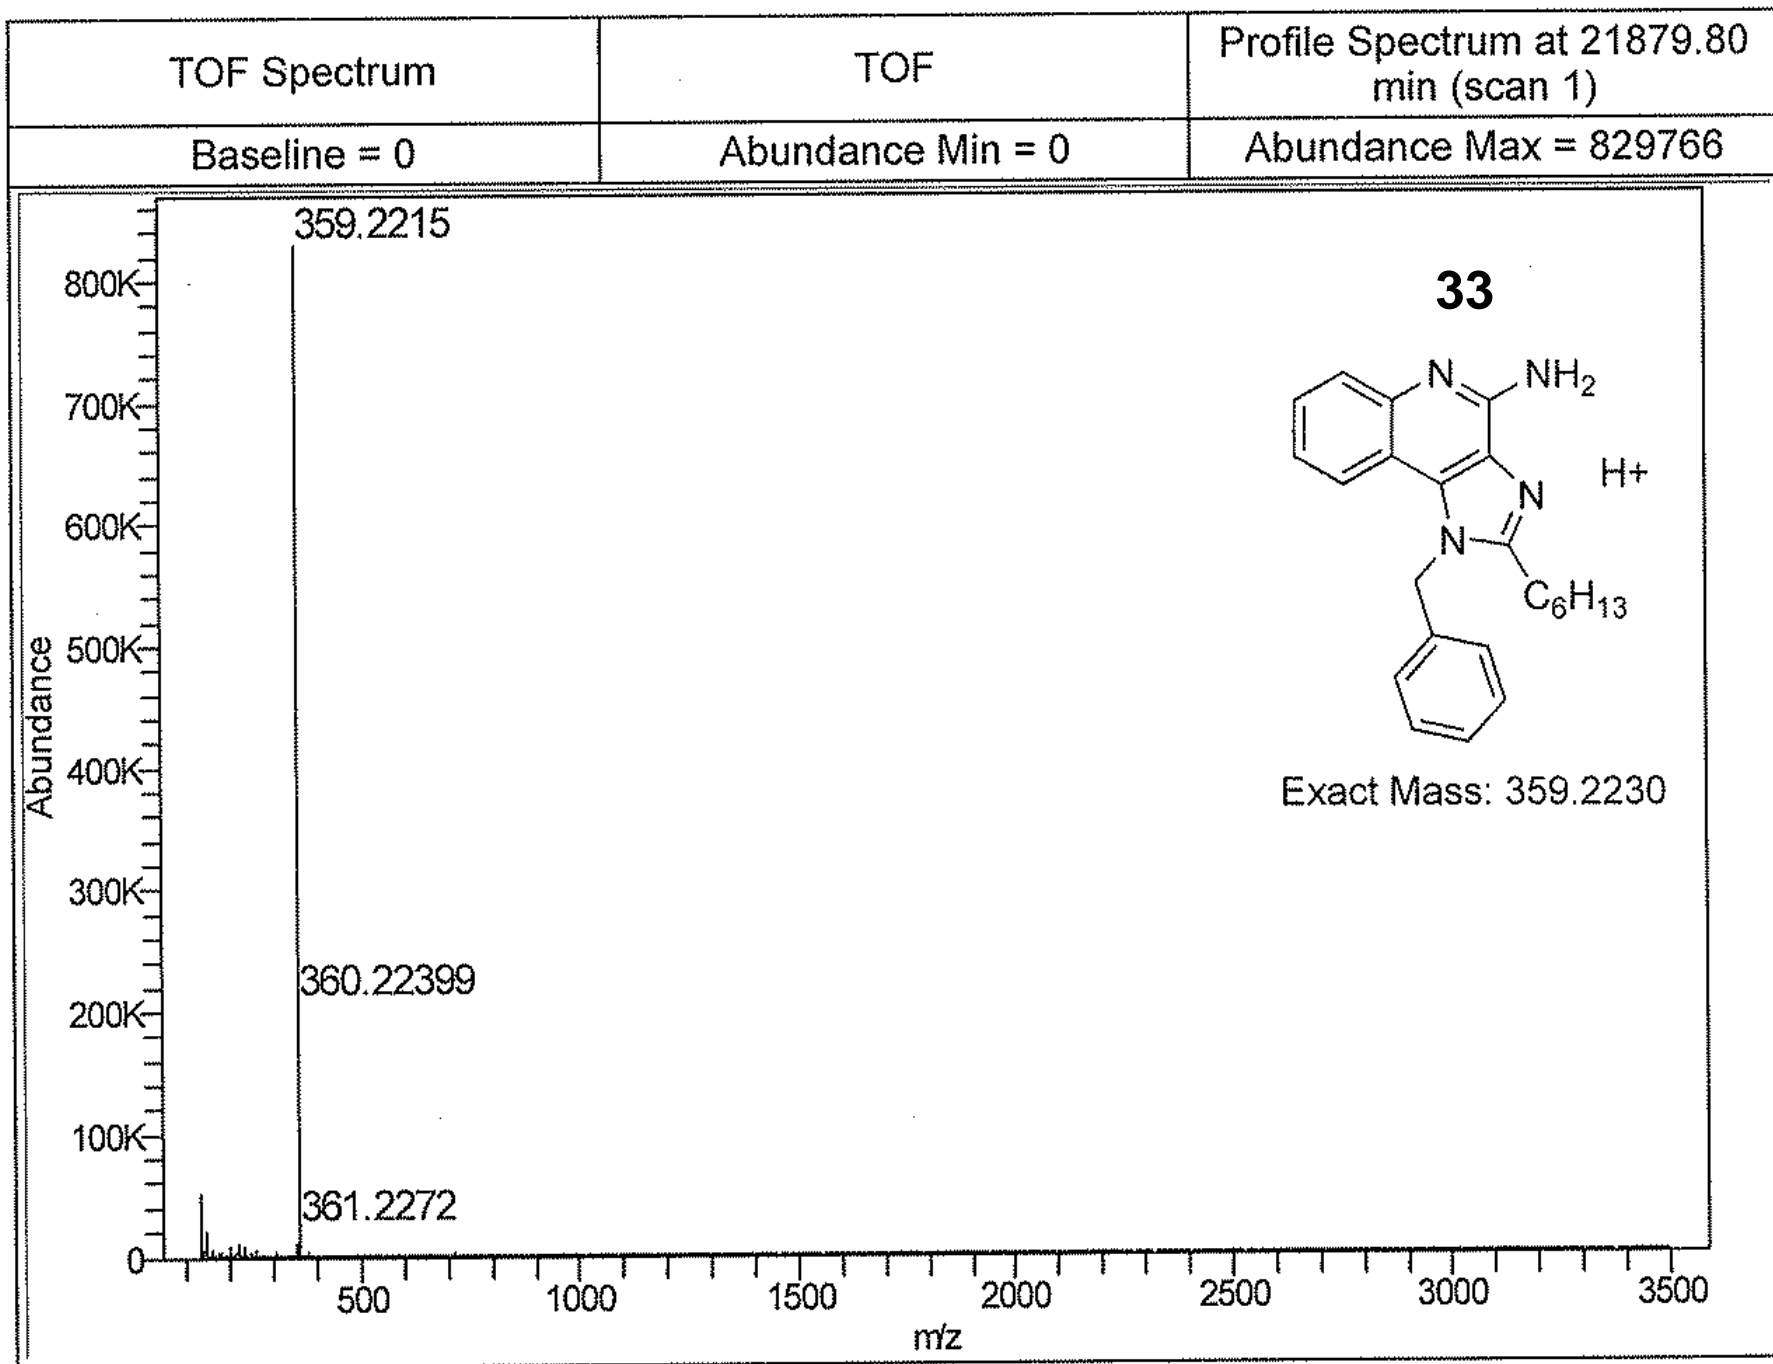

# <sup>1</sup>H Spectrum

34

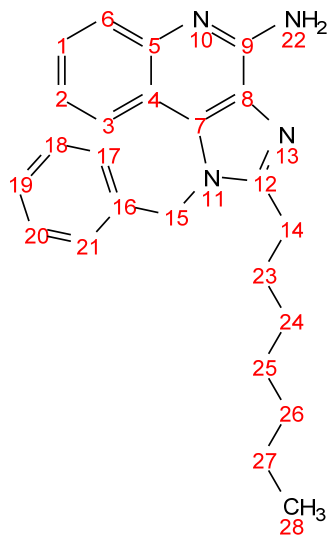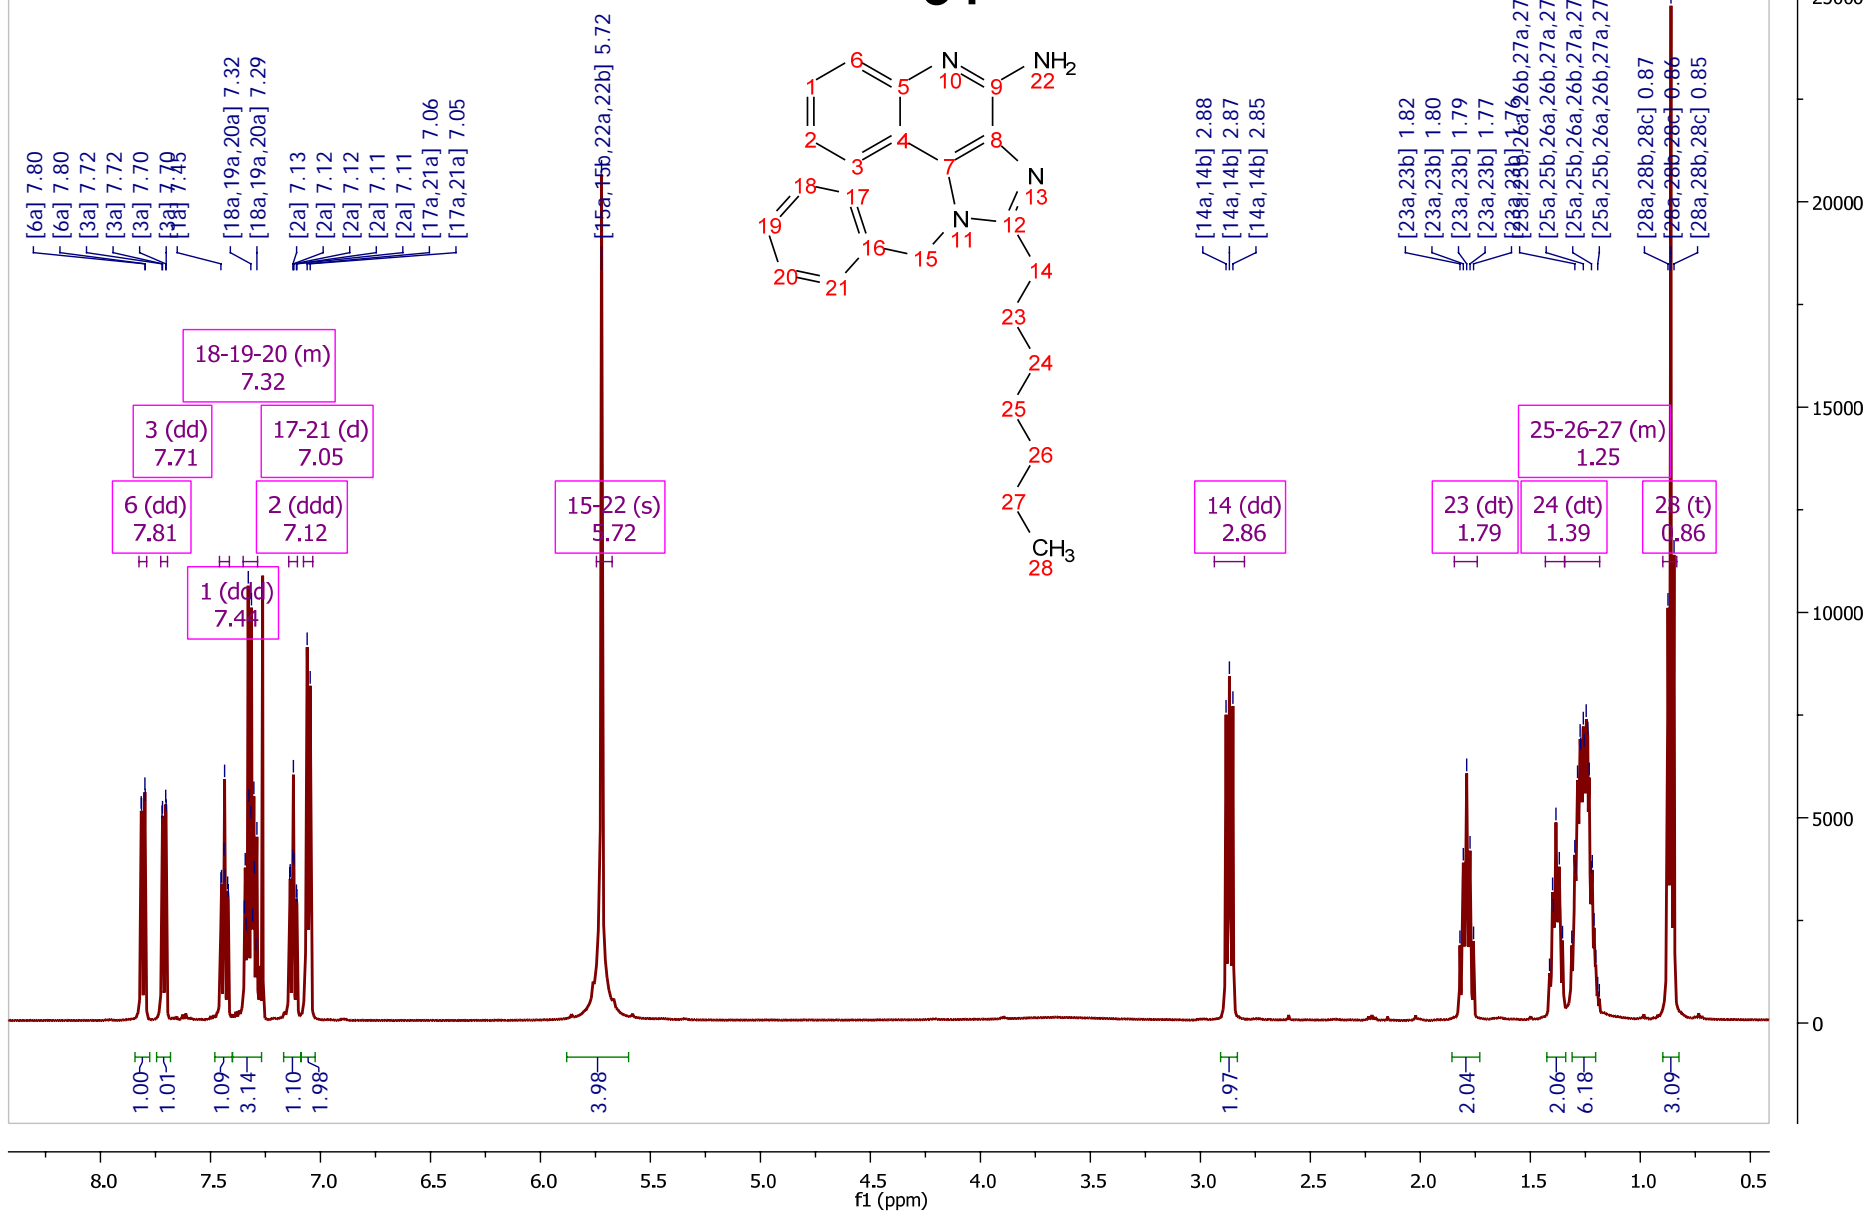

# <sup>13</sup>C Spectrum

**34**

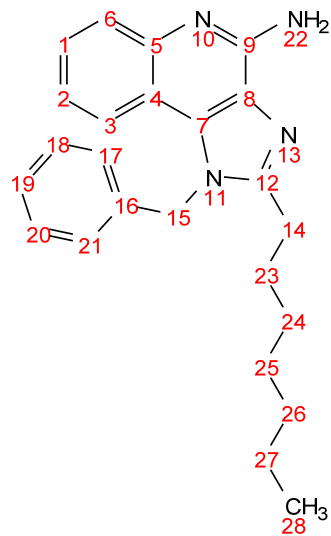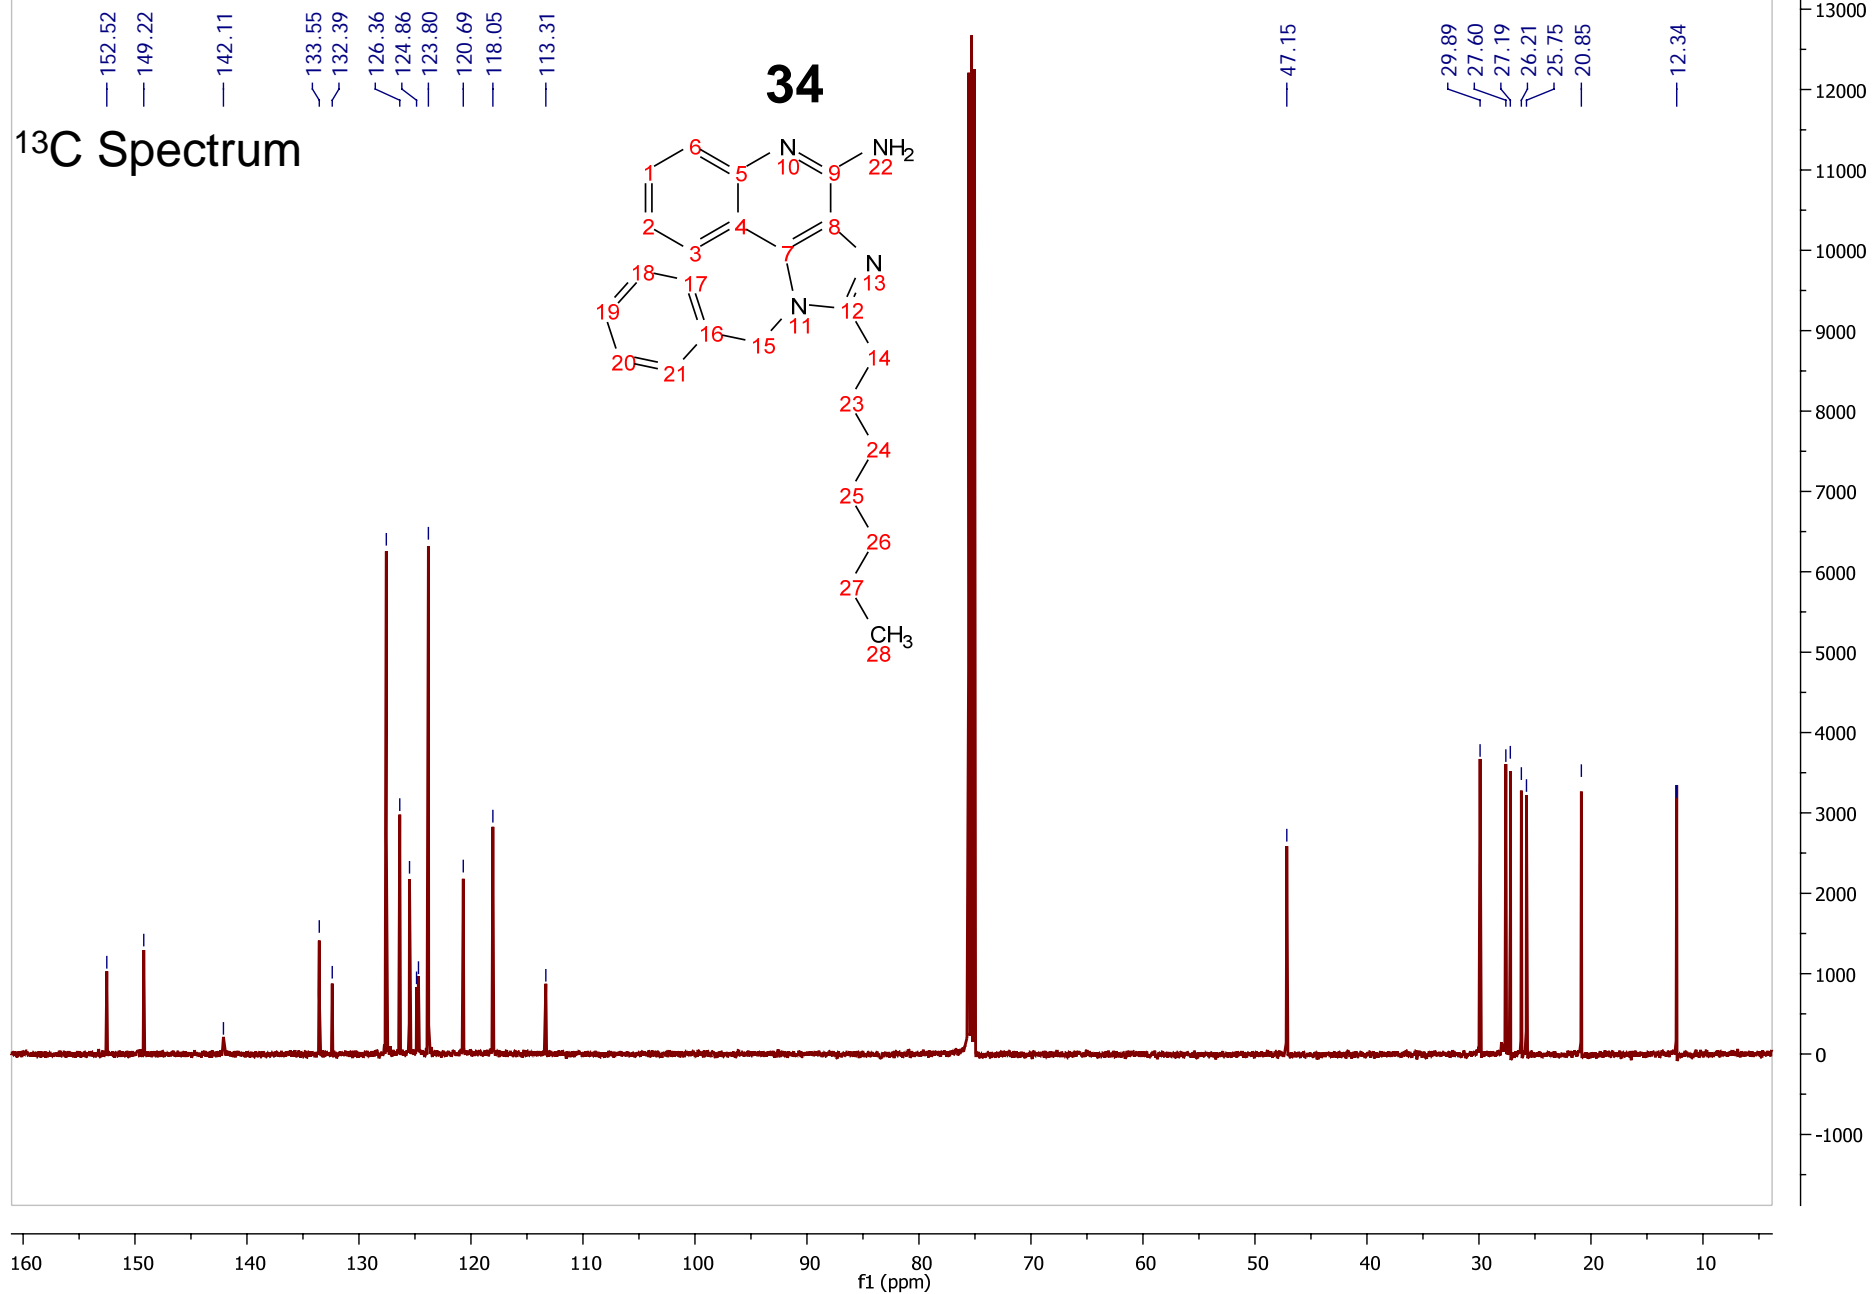

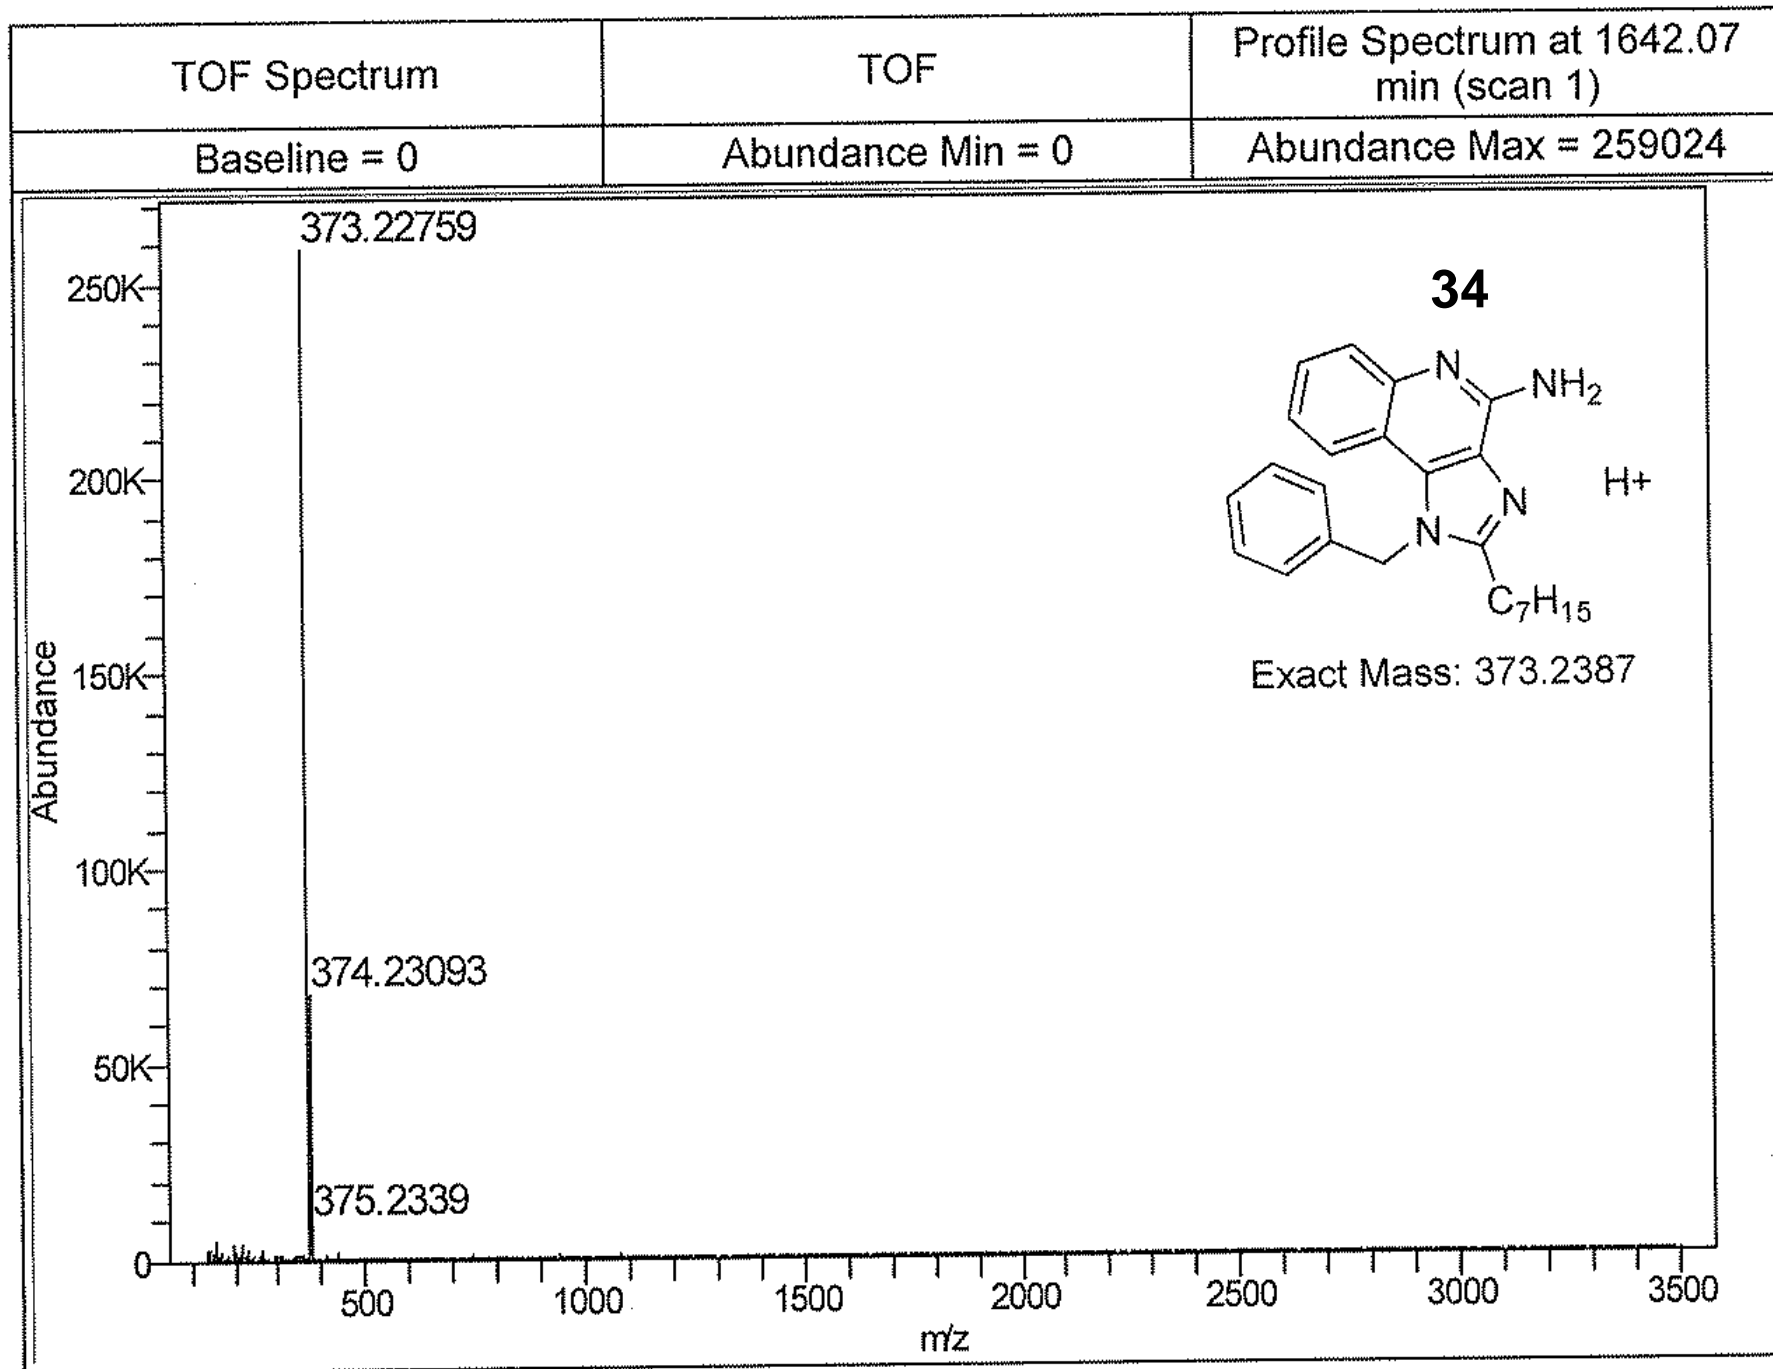

# <sup>1</sup>H Spectrum

35

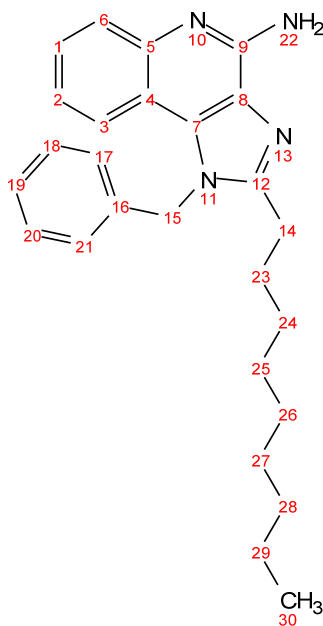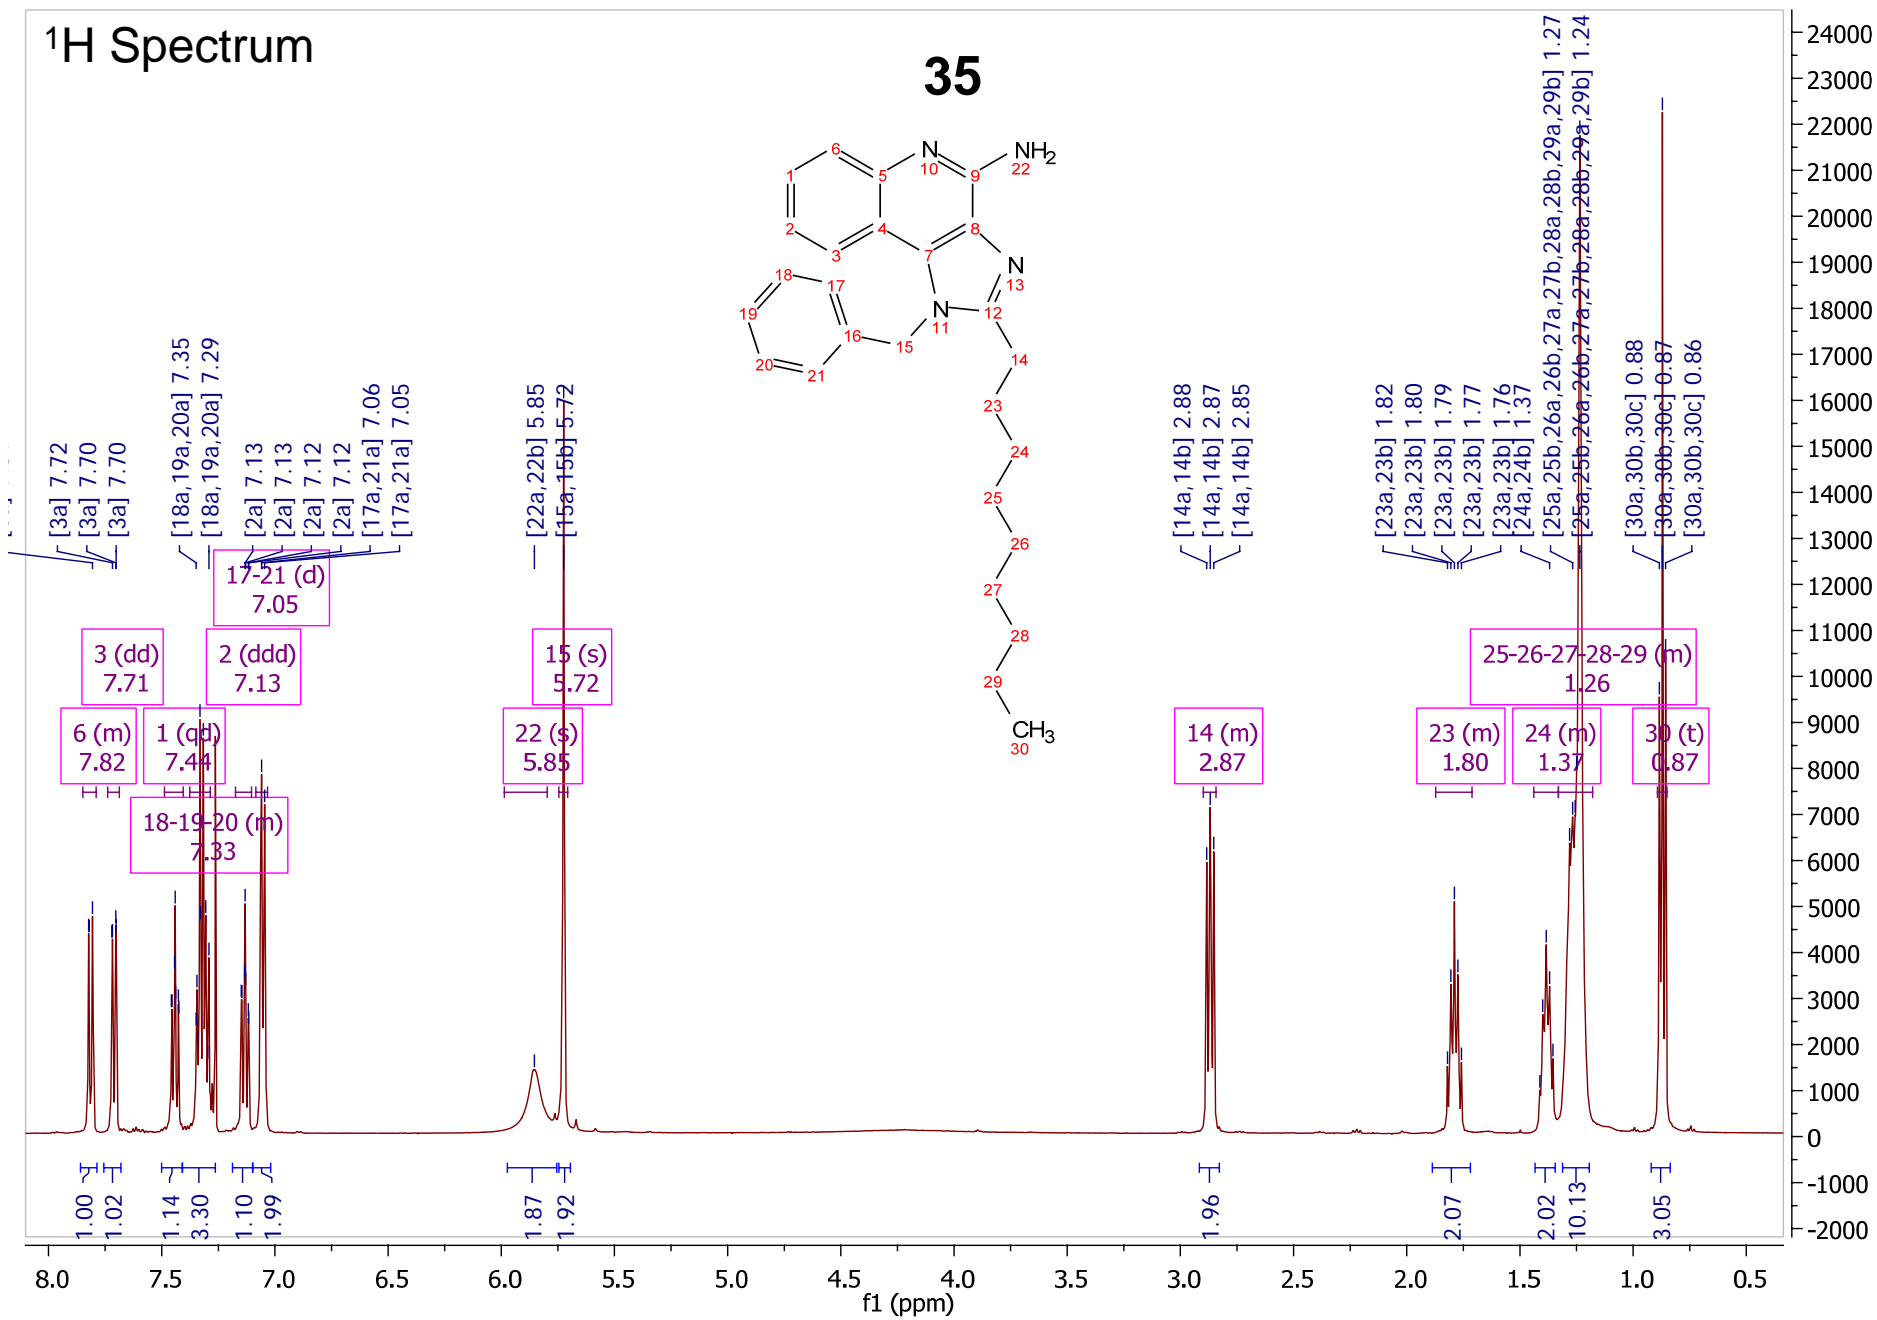



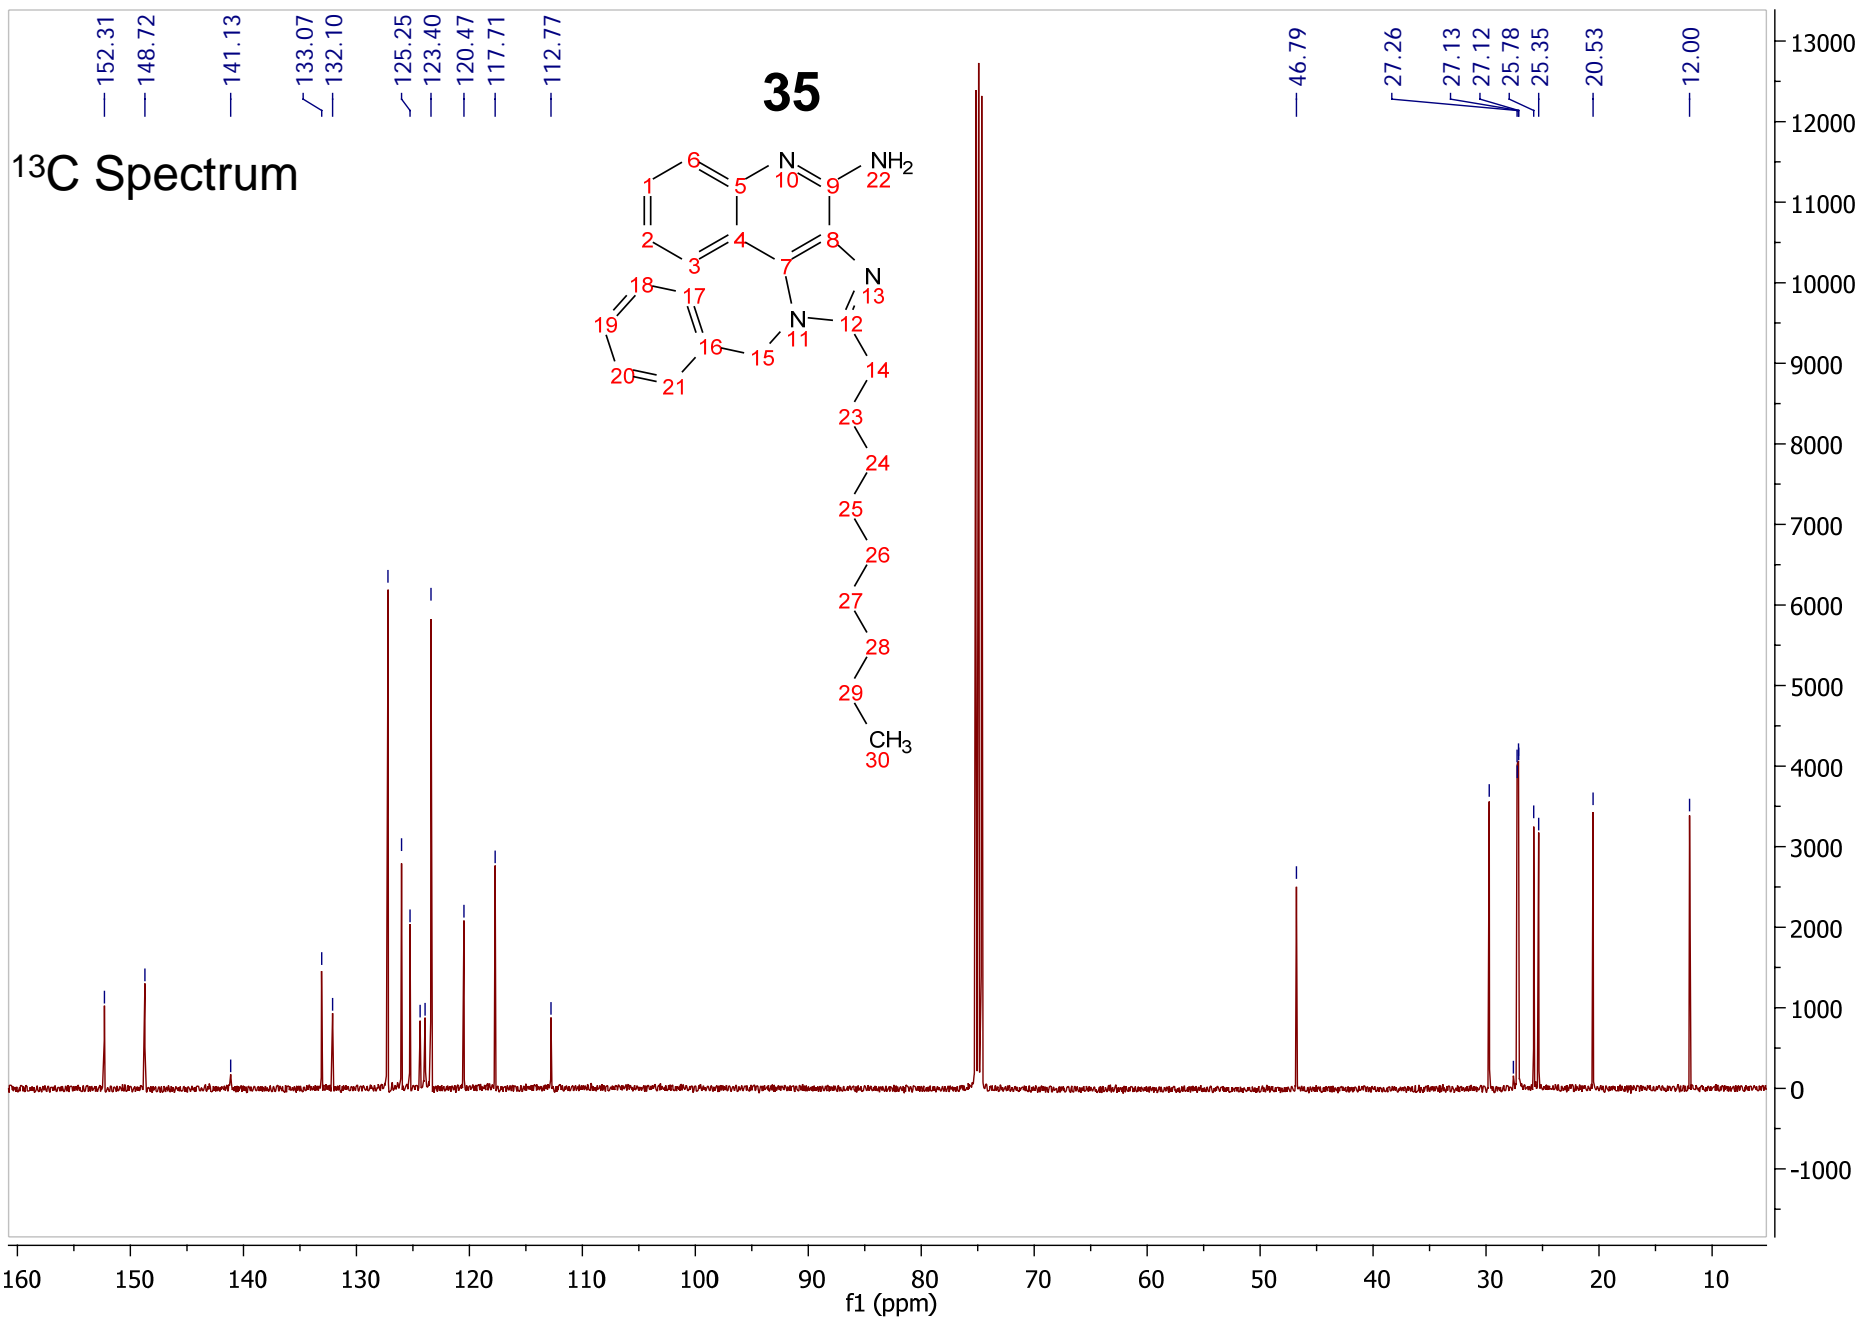

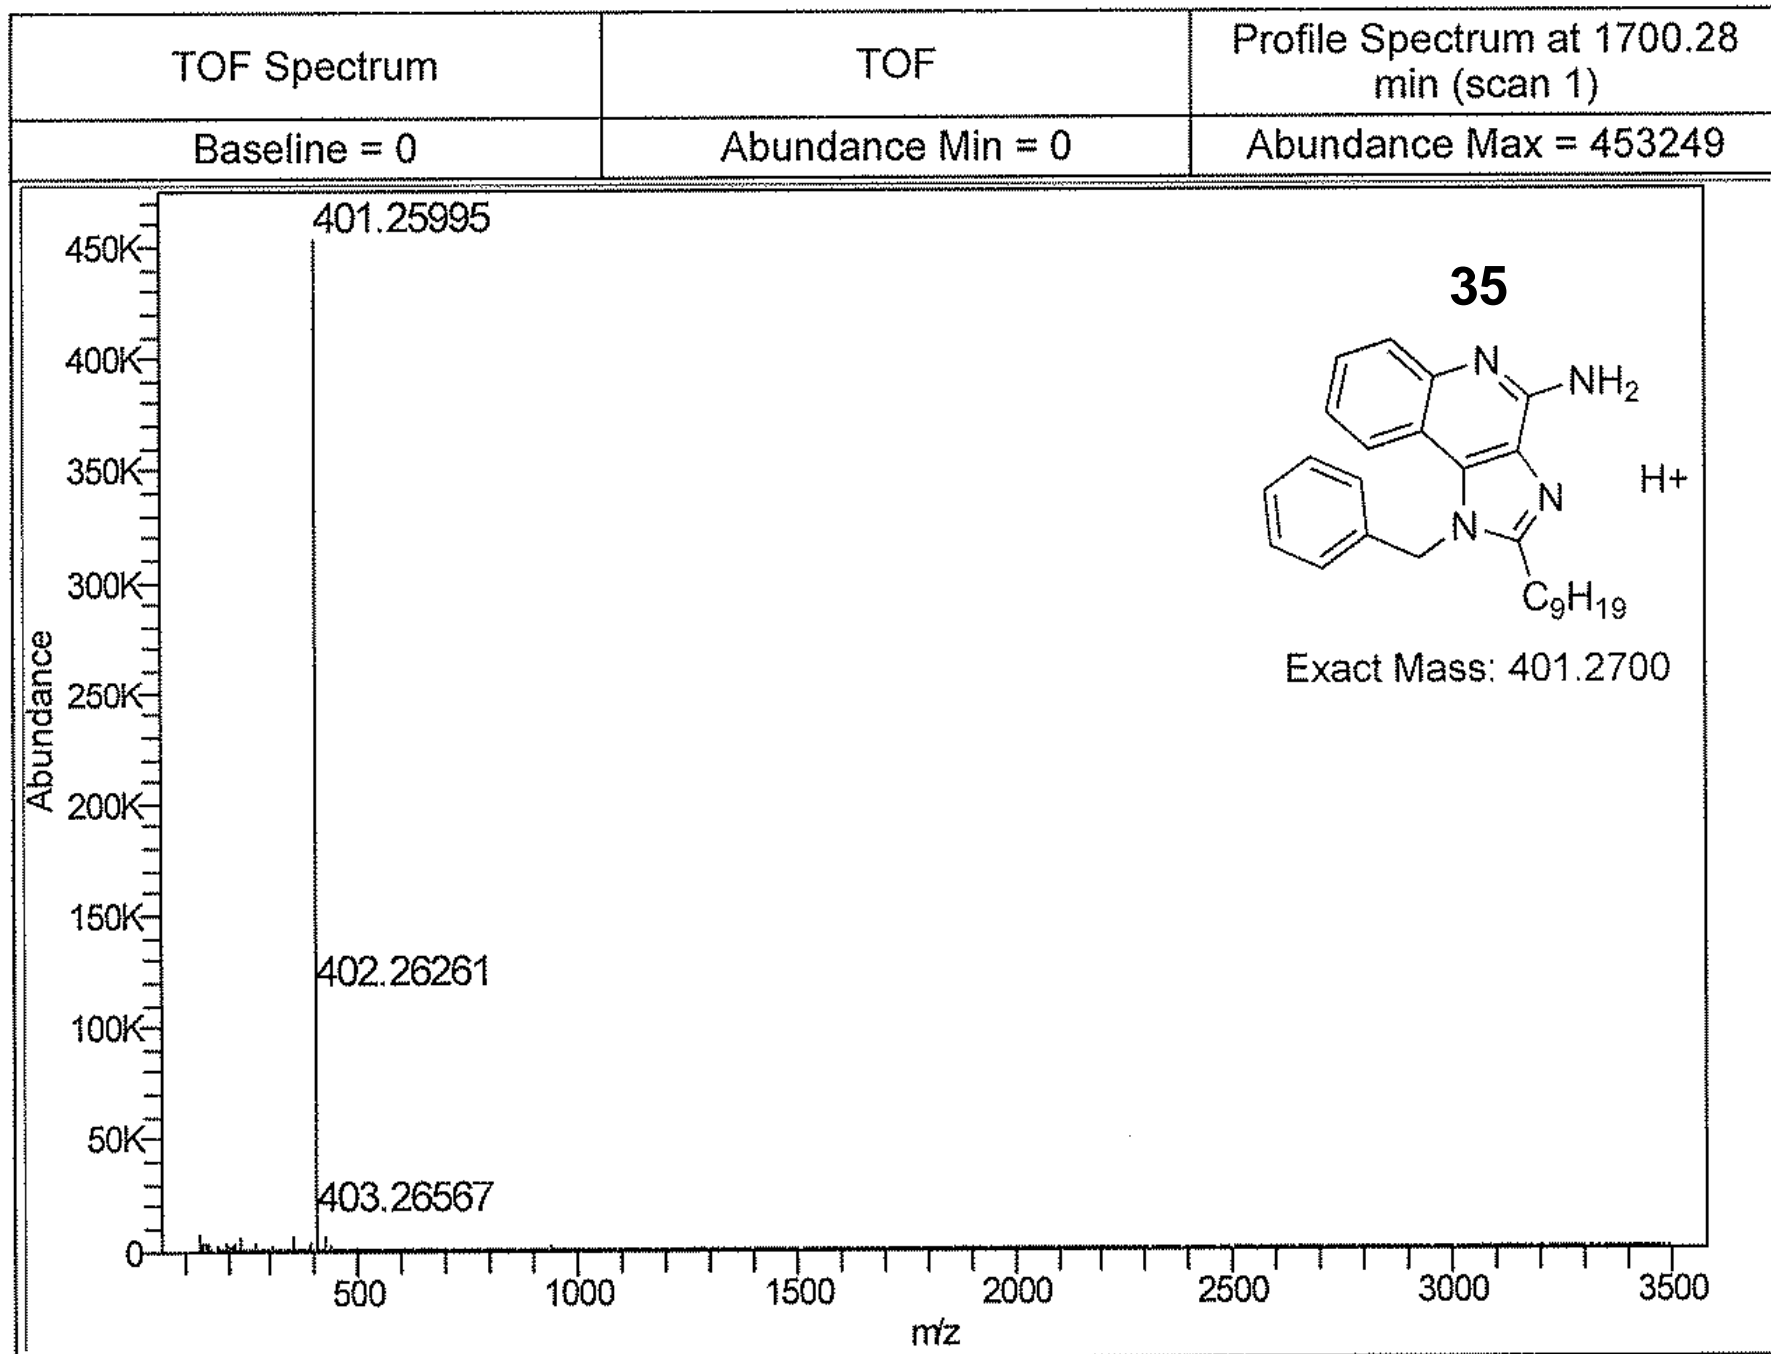

# <sup>1</sup>H Spectrum

36

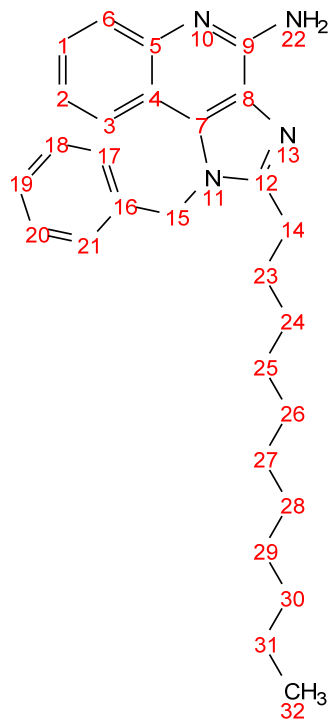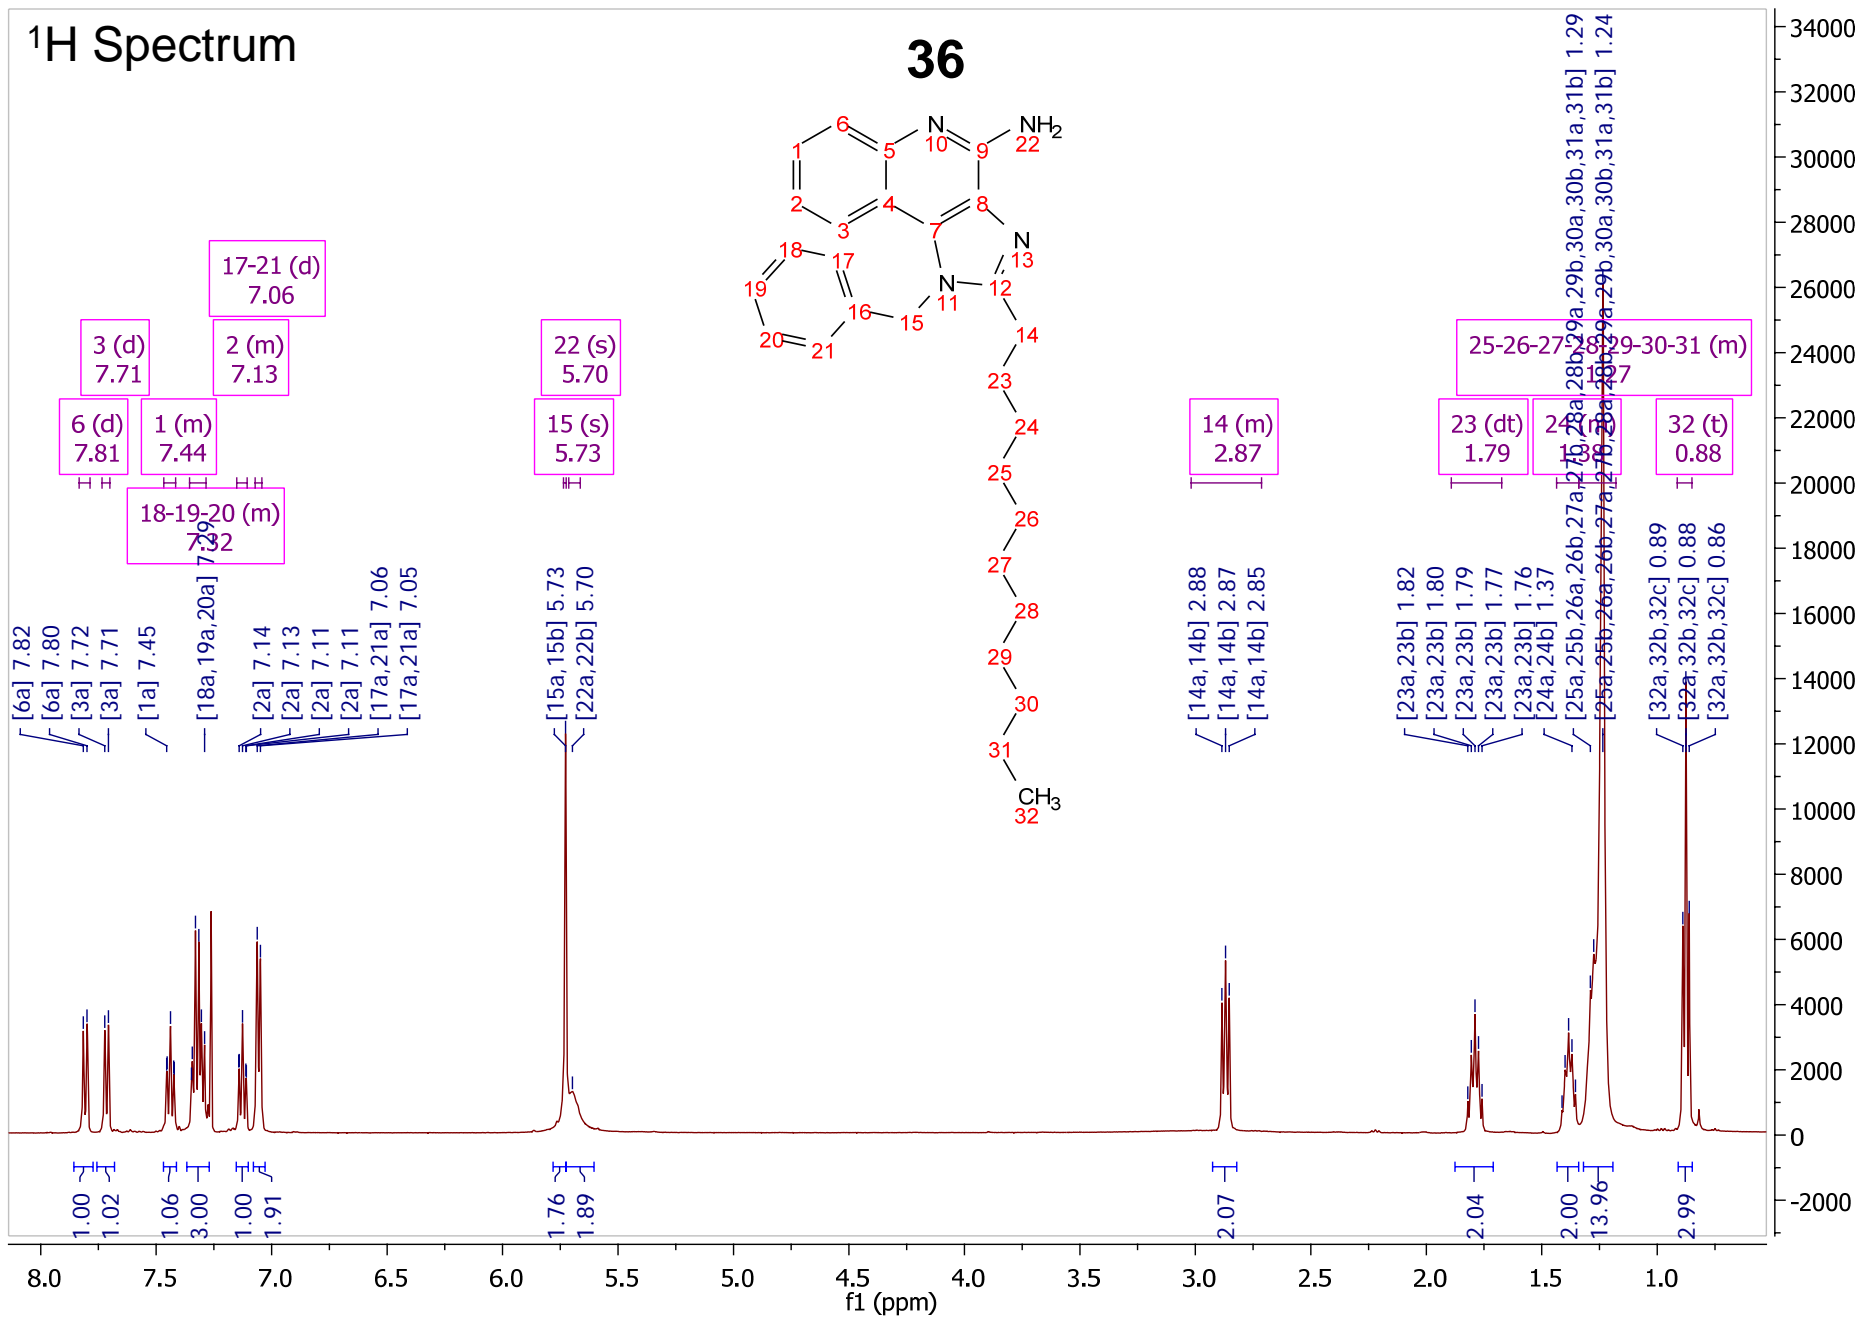

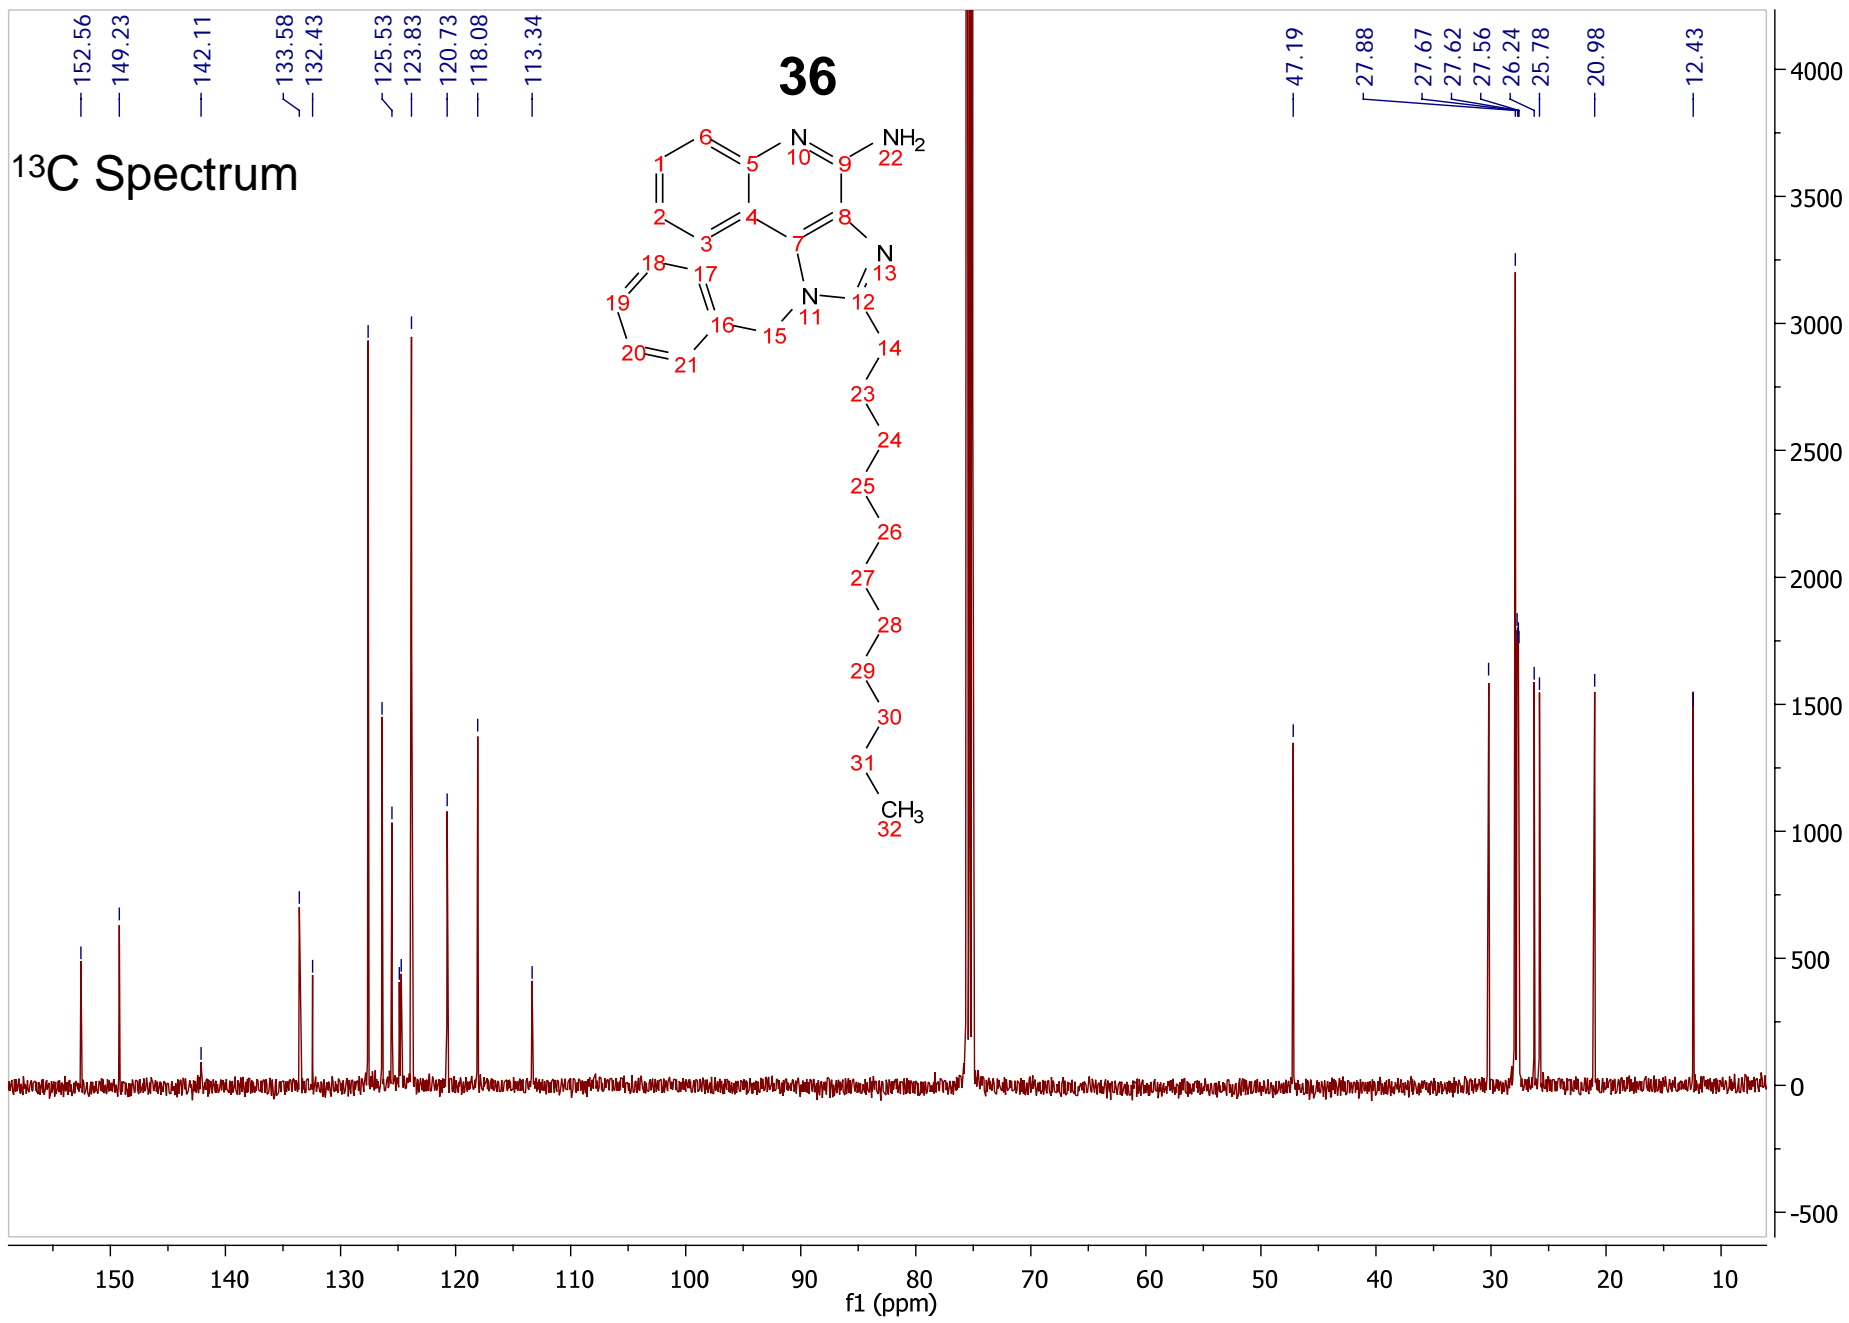

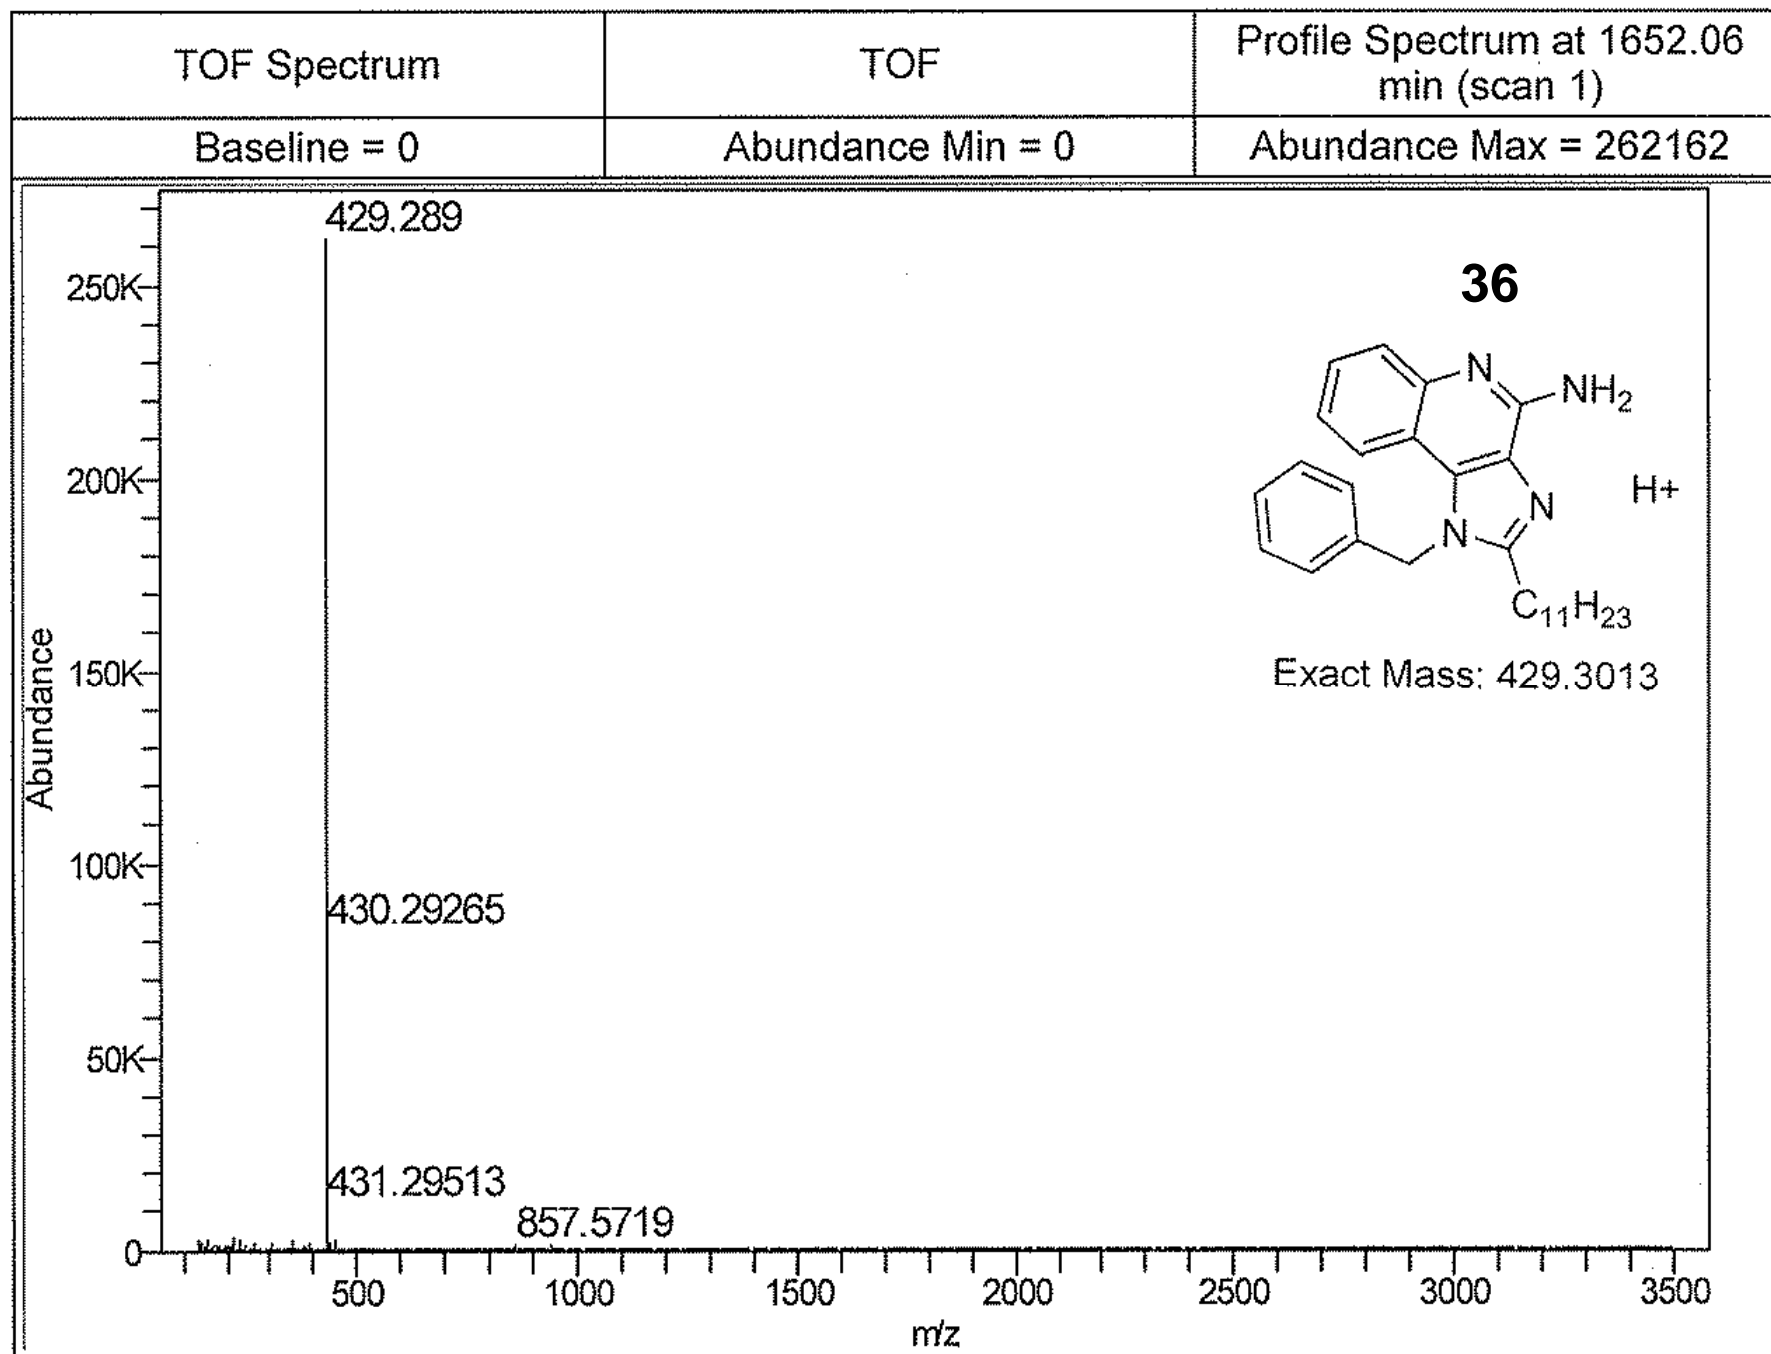

# <sup>1</sup>H Spectrum

## 37

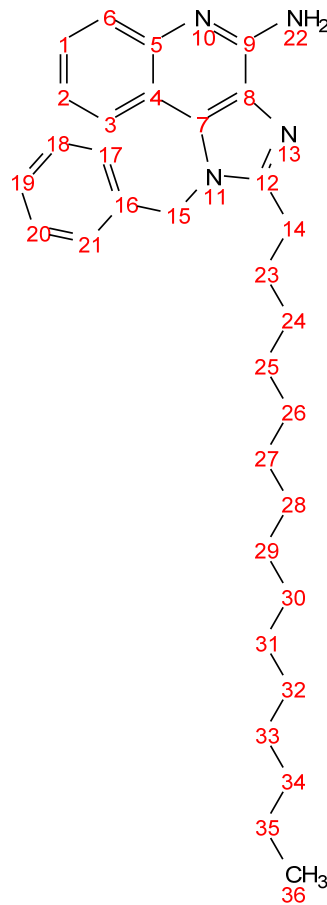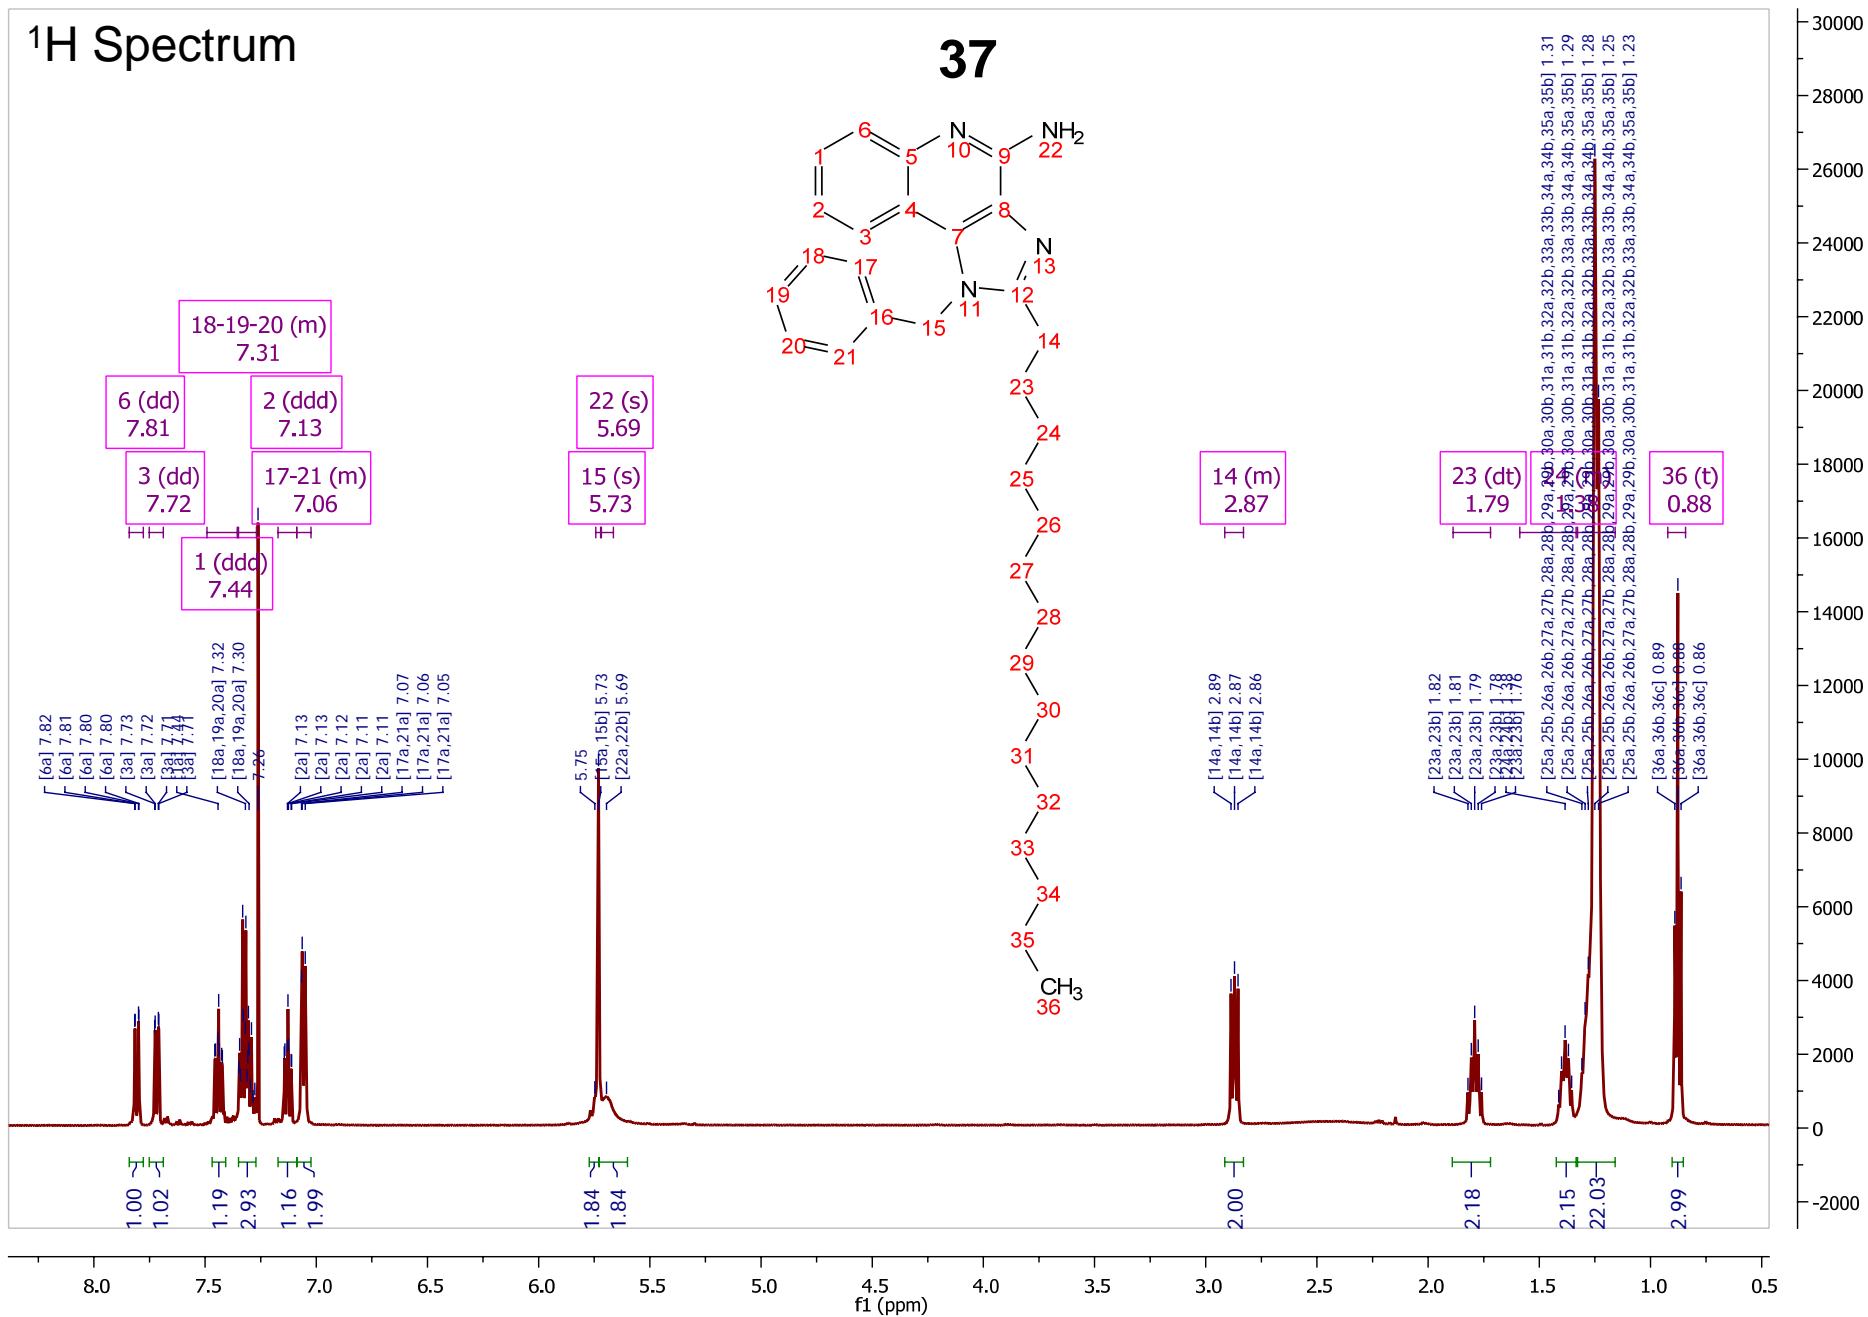

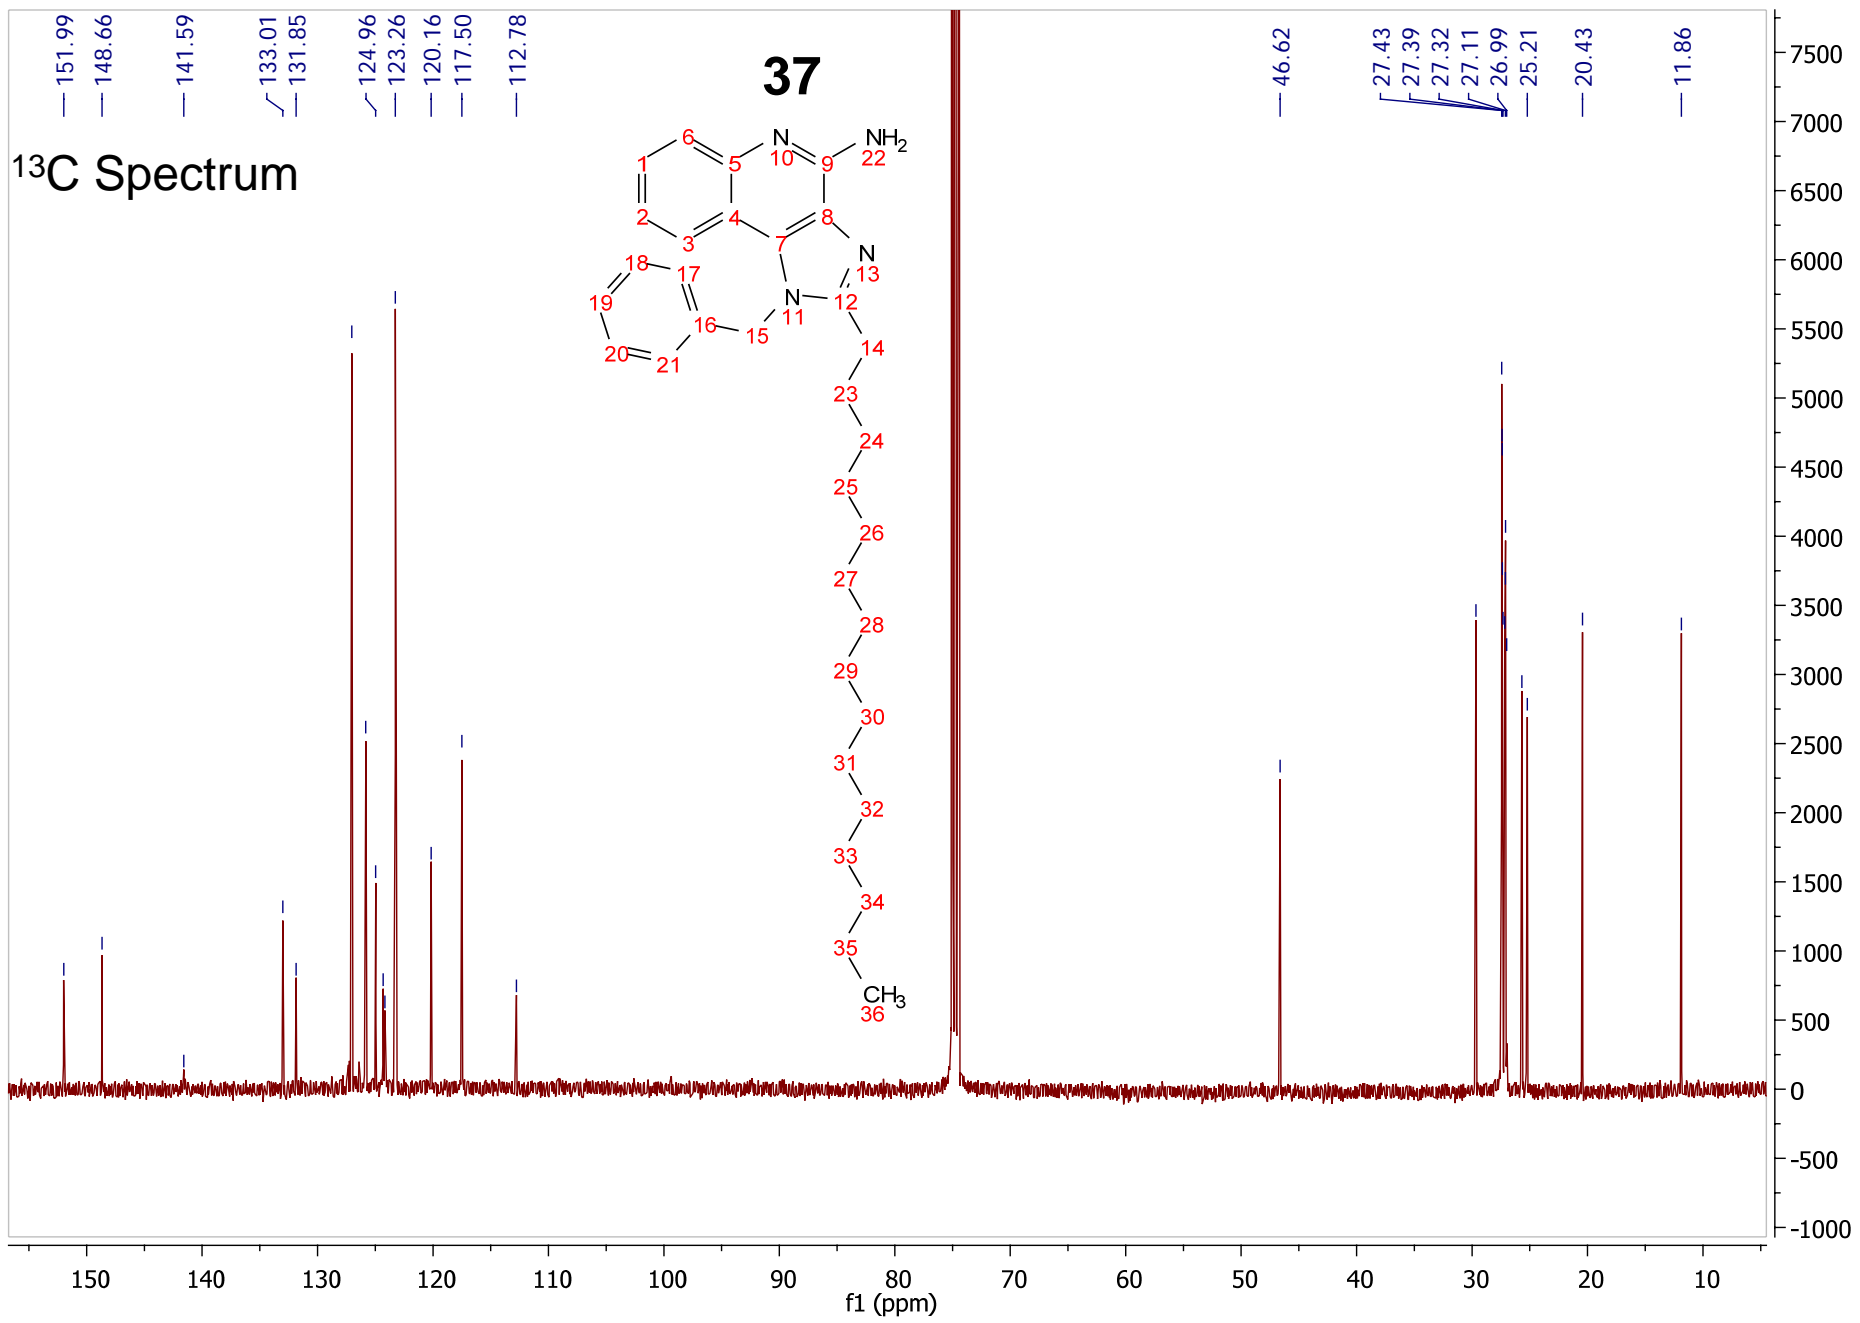

|              |                   |                                          |
|--------------|-------------------|------------------------------------------|
| TOF Spectrum | TOF               | Profile Spectrum at 1705.20 min (scan 1) |
| Baseline = 0 | Abundance Min = 0 | Abundance Max = 123388                   |

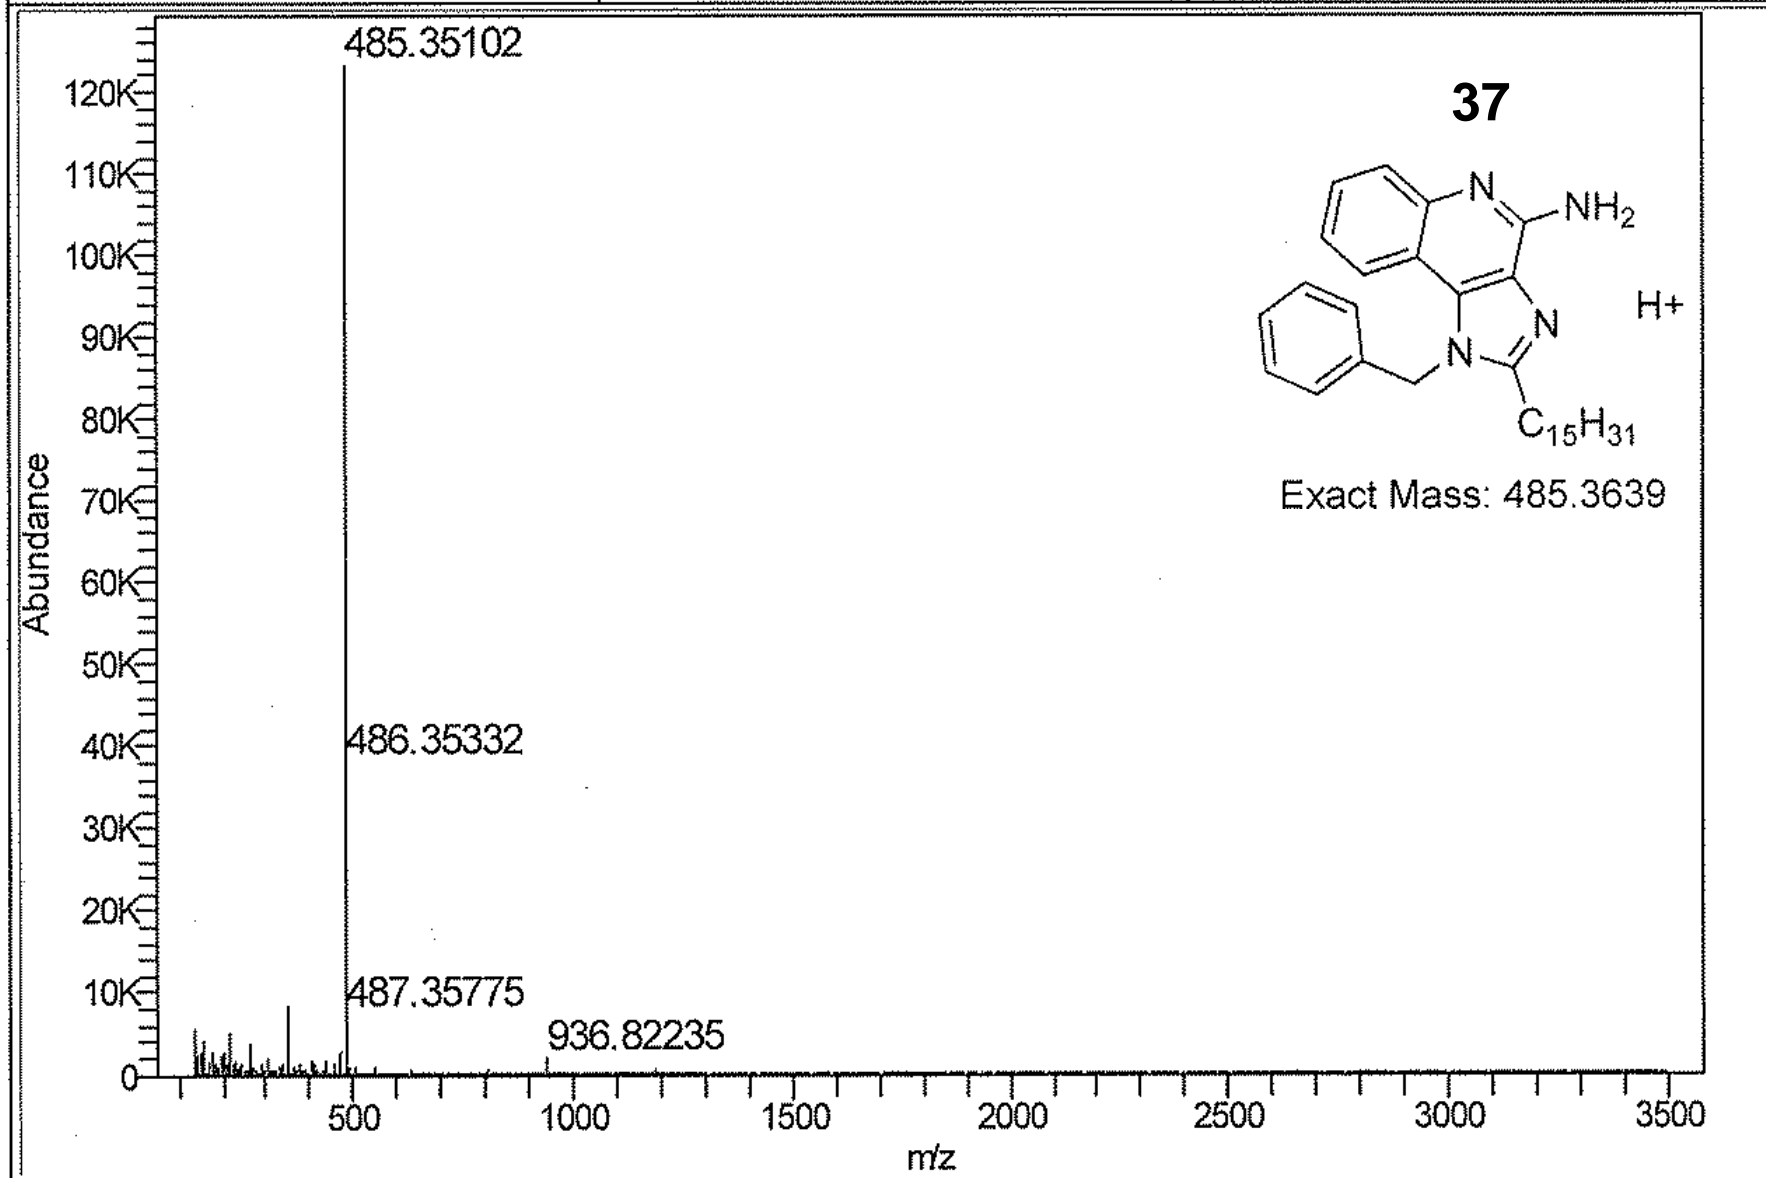



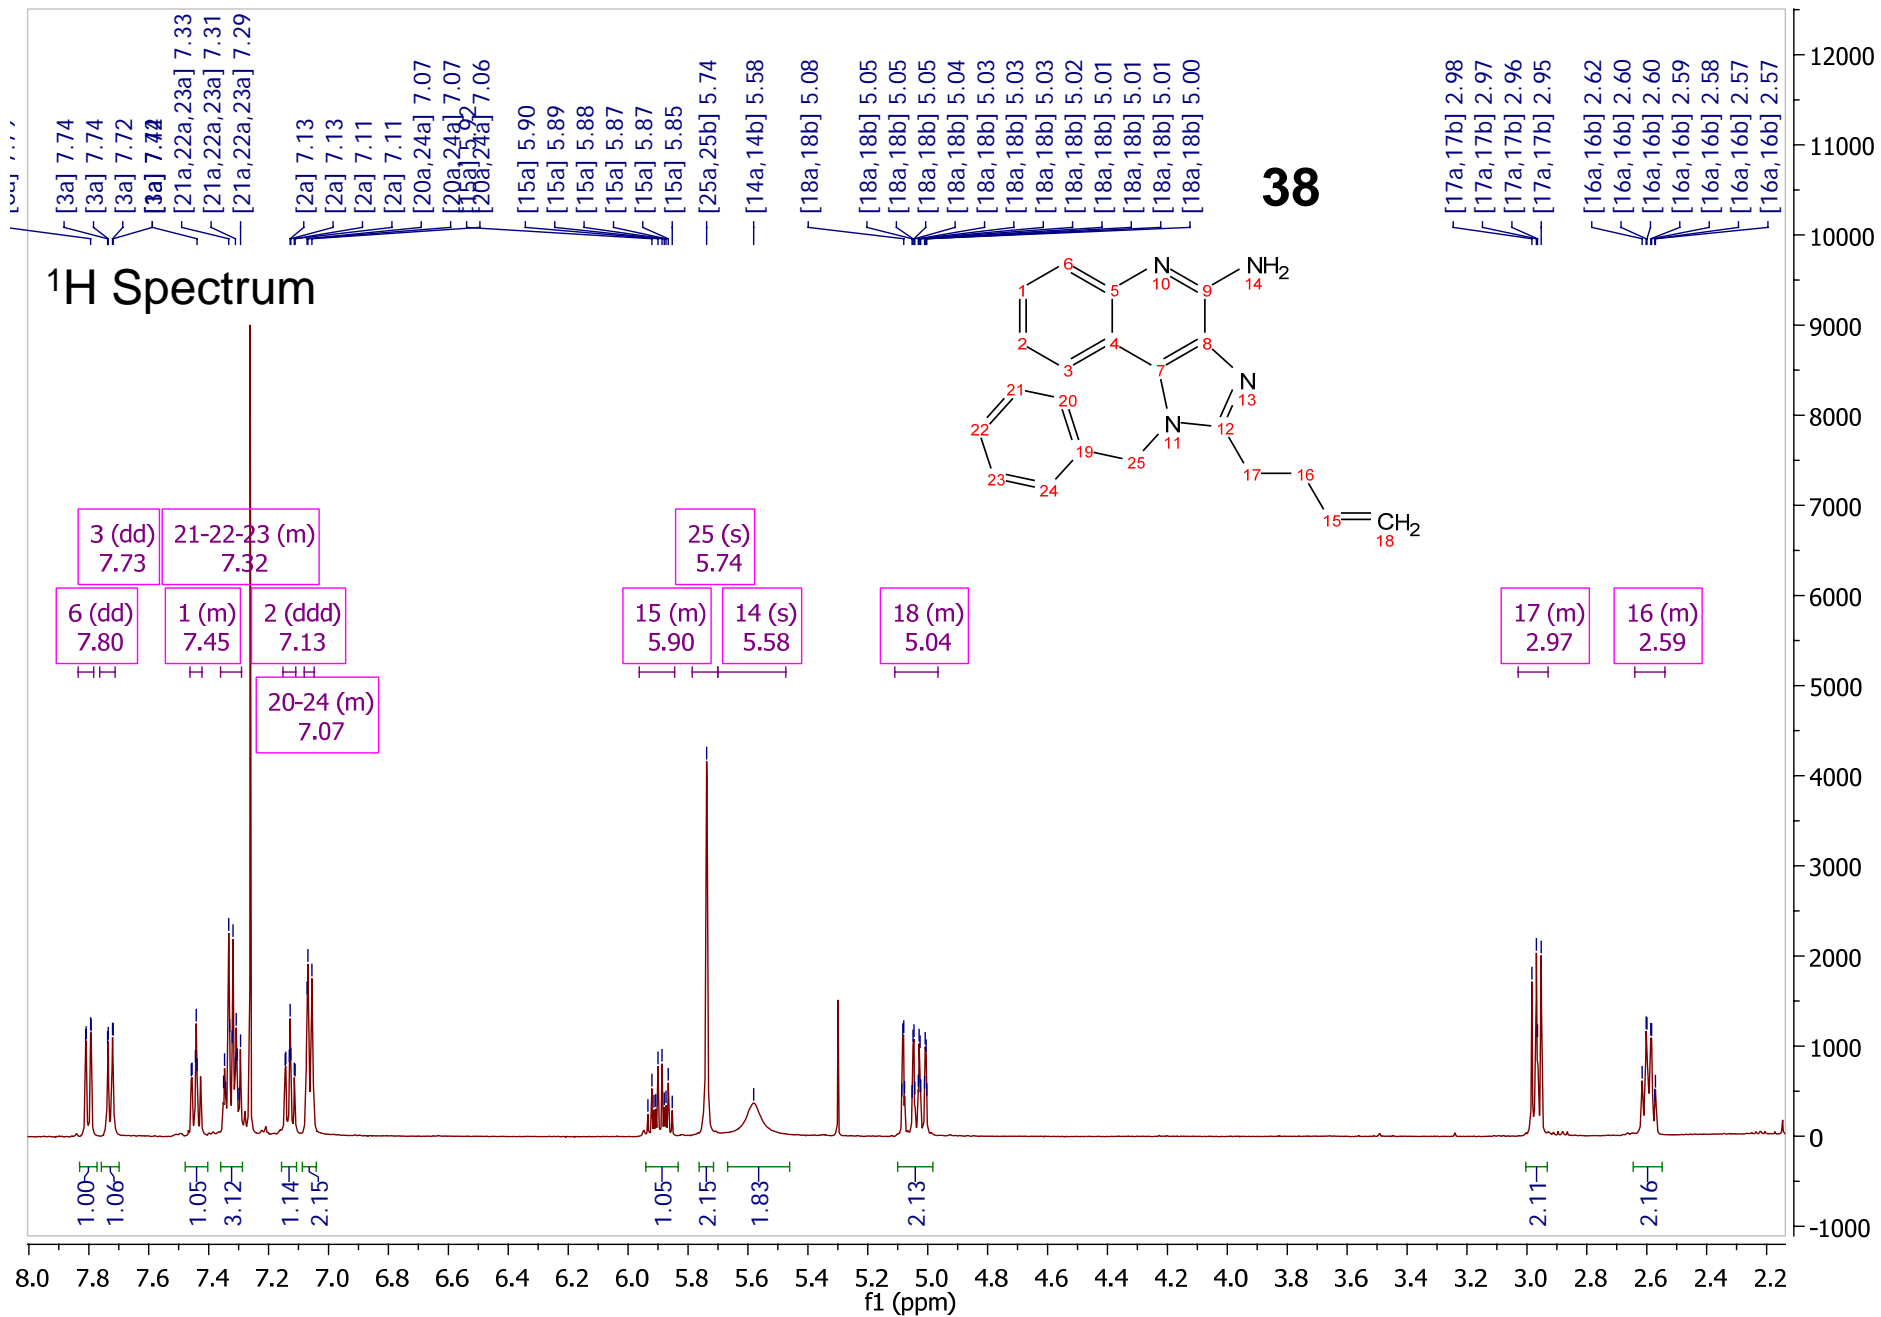

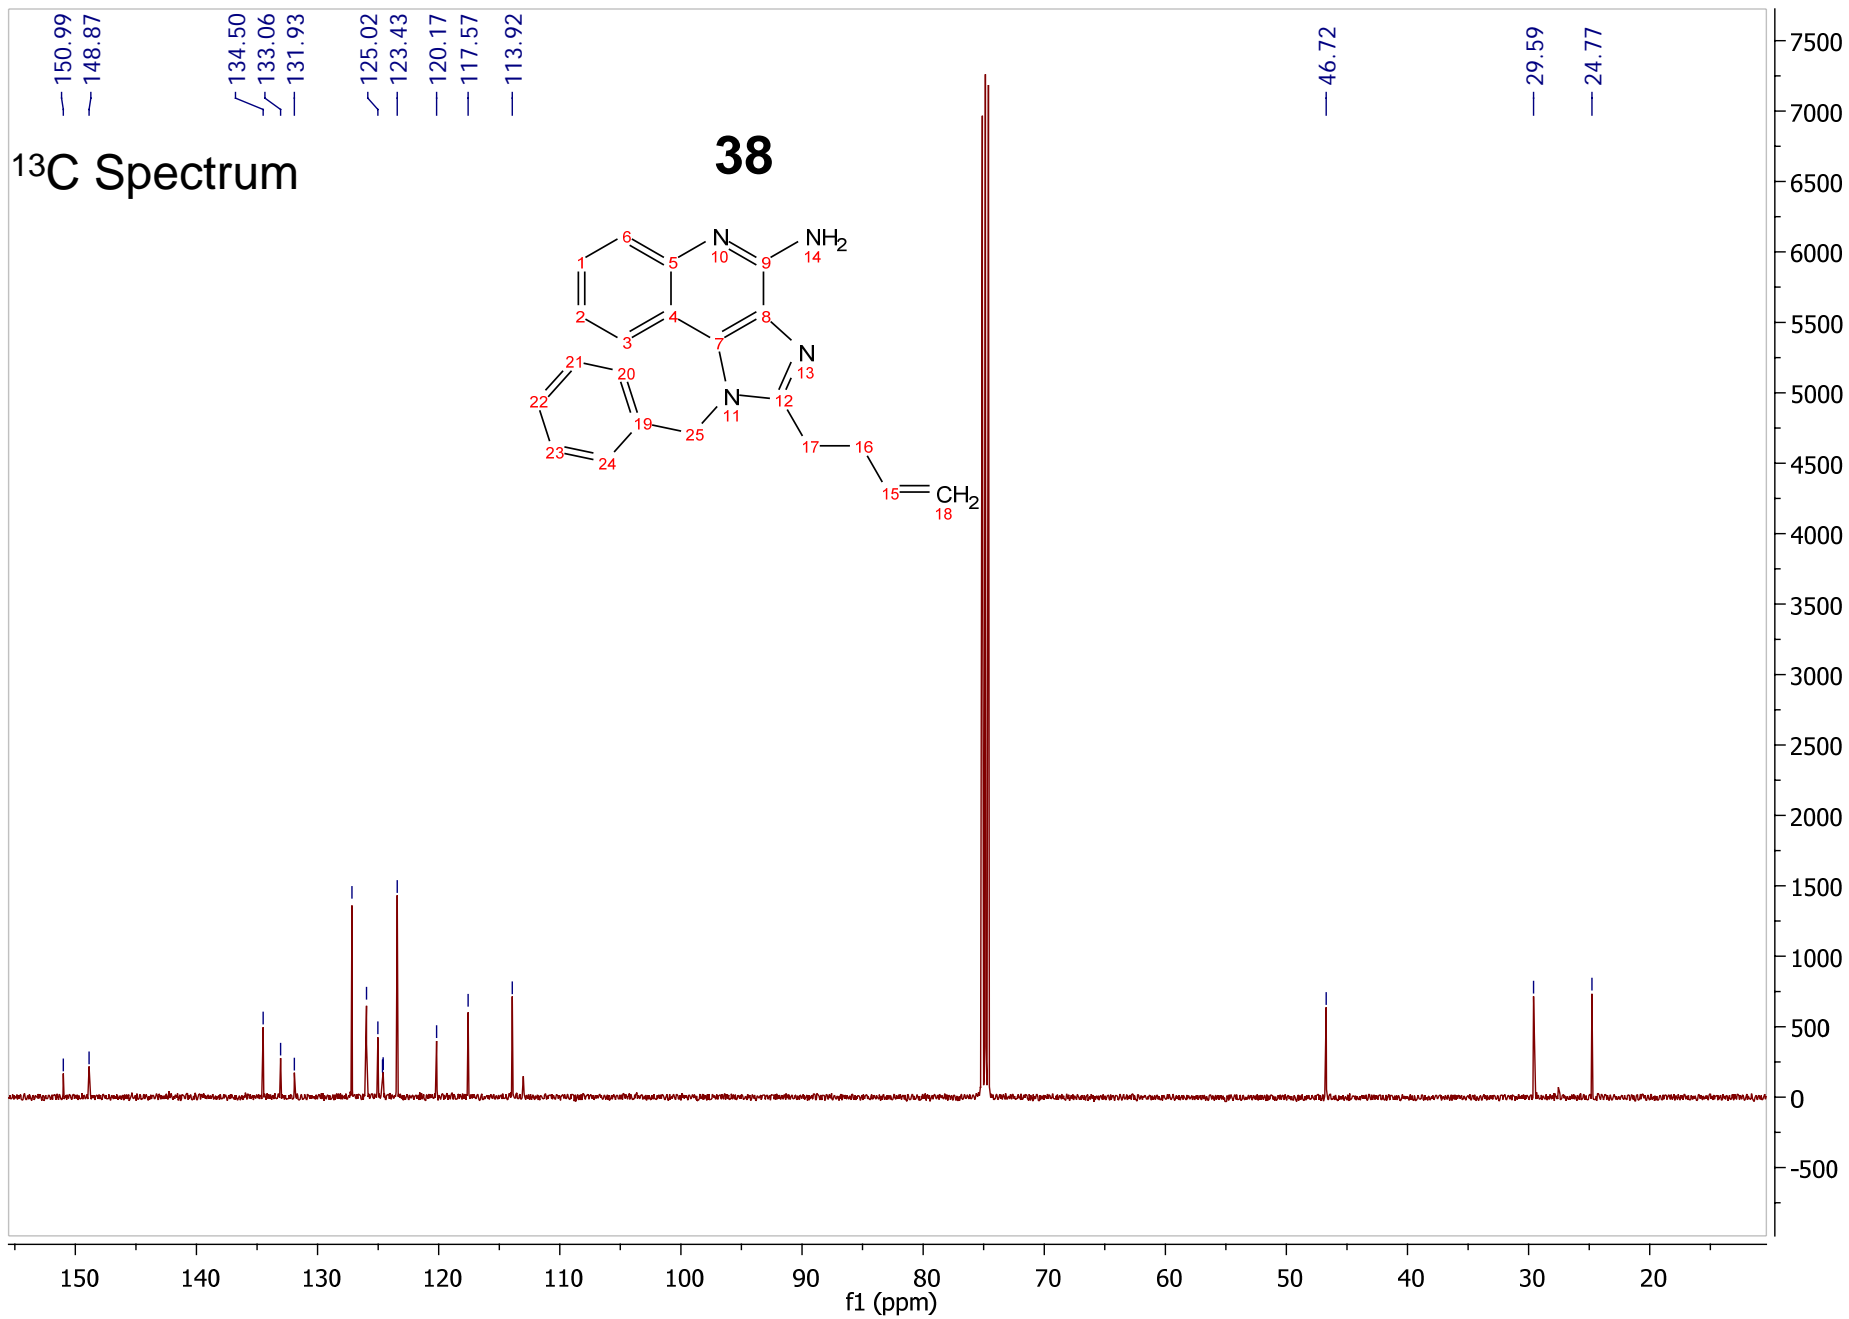

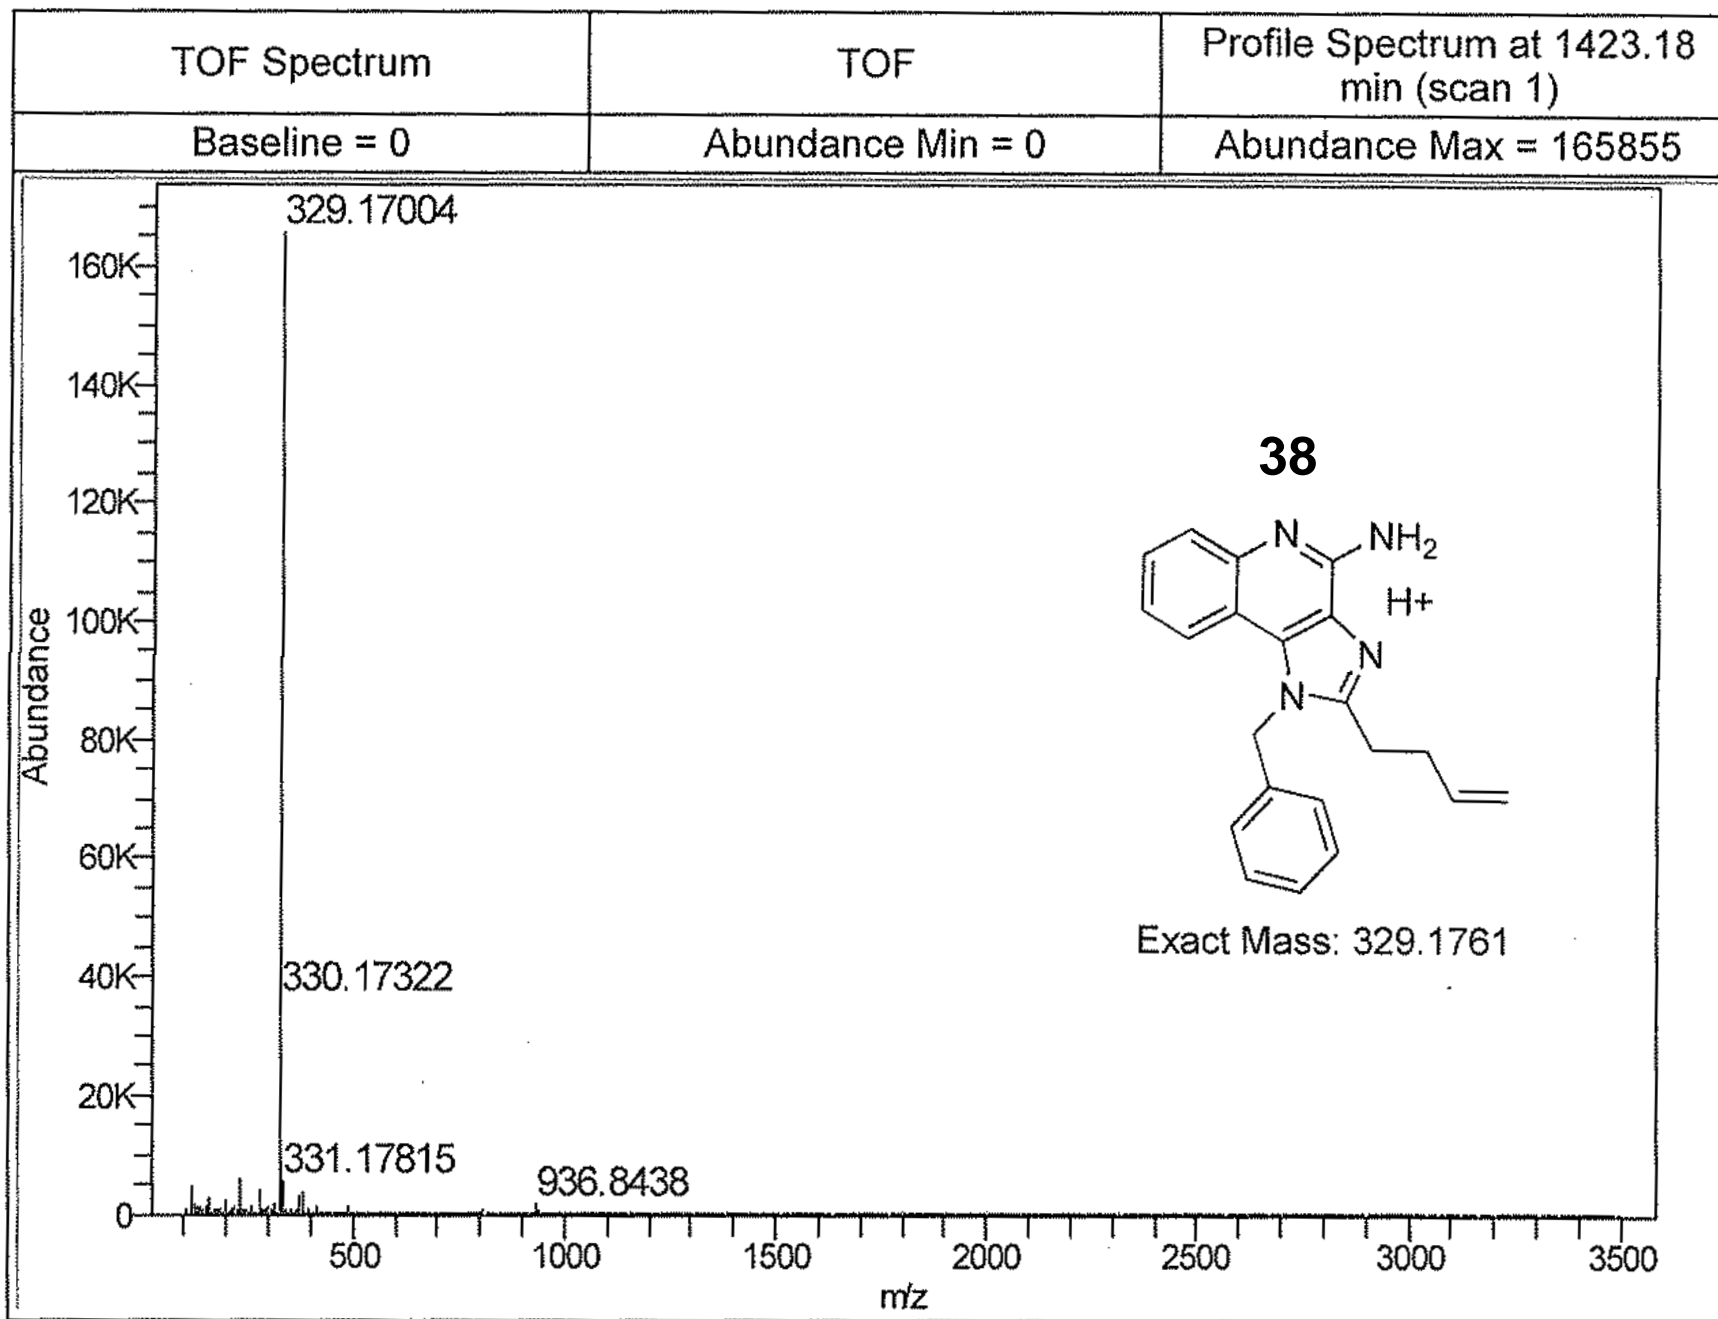

# <sup>1</sup>H Spectrum

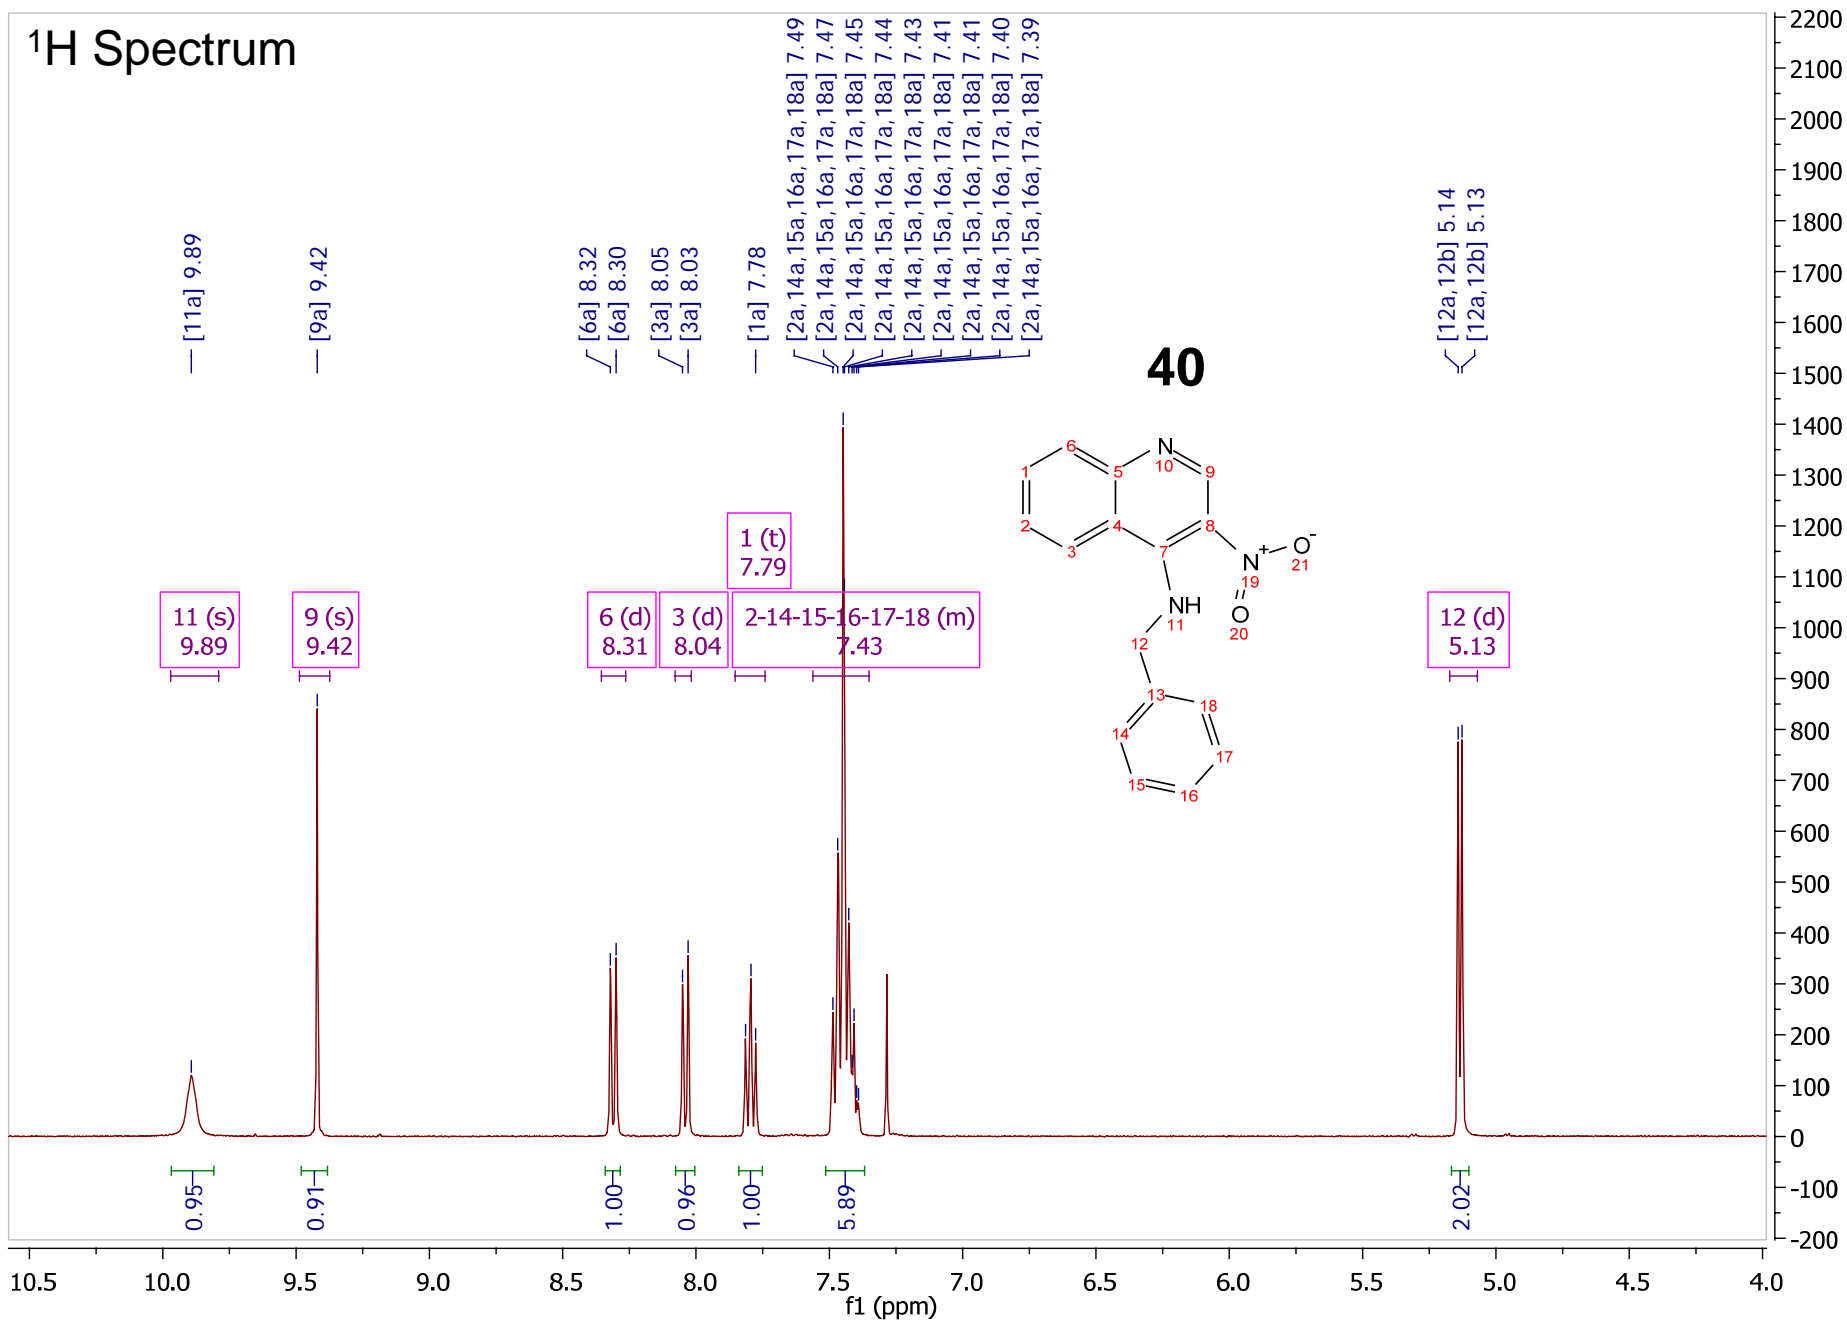

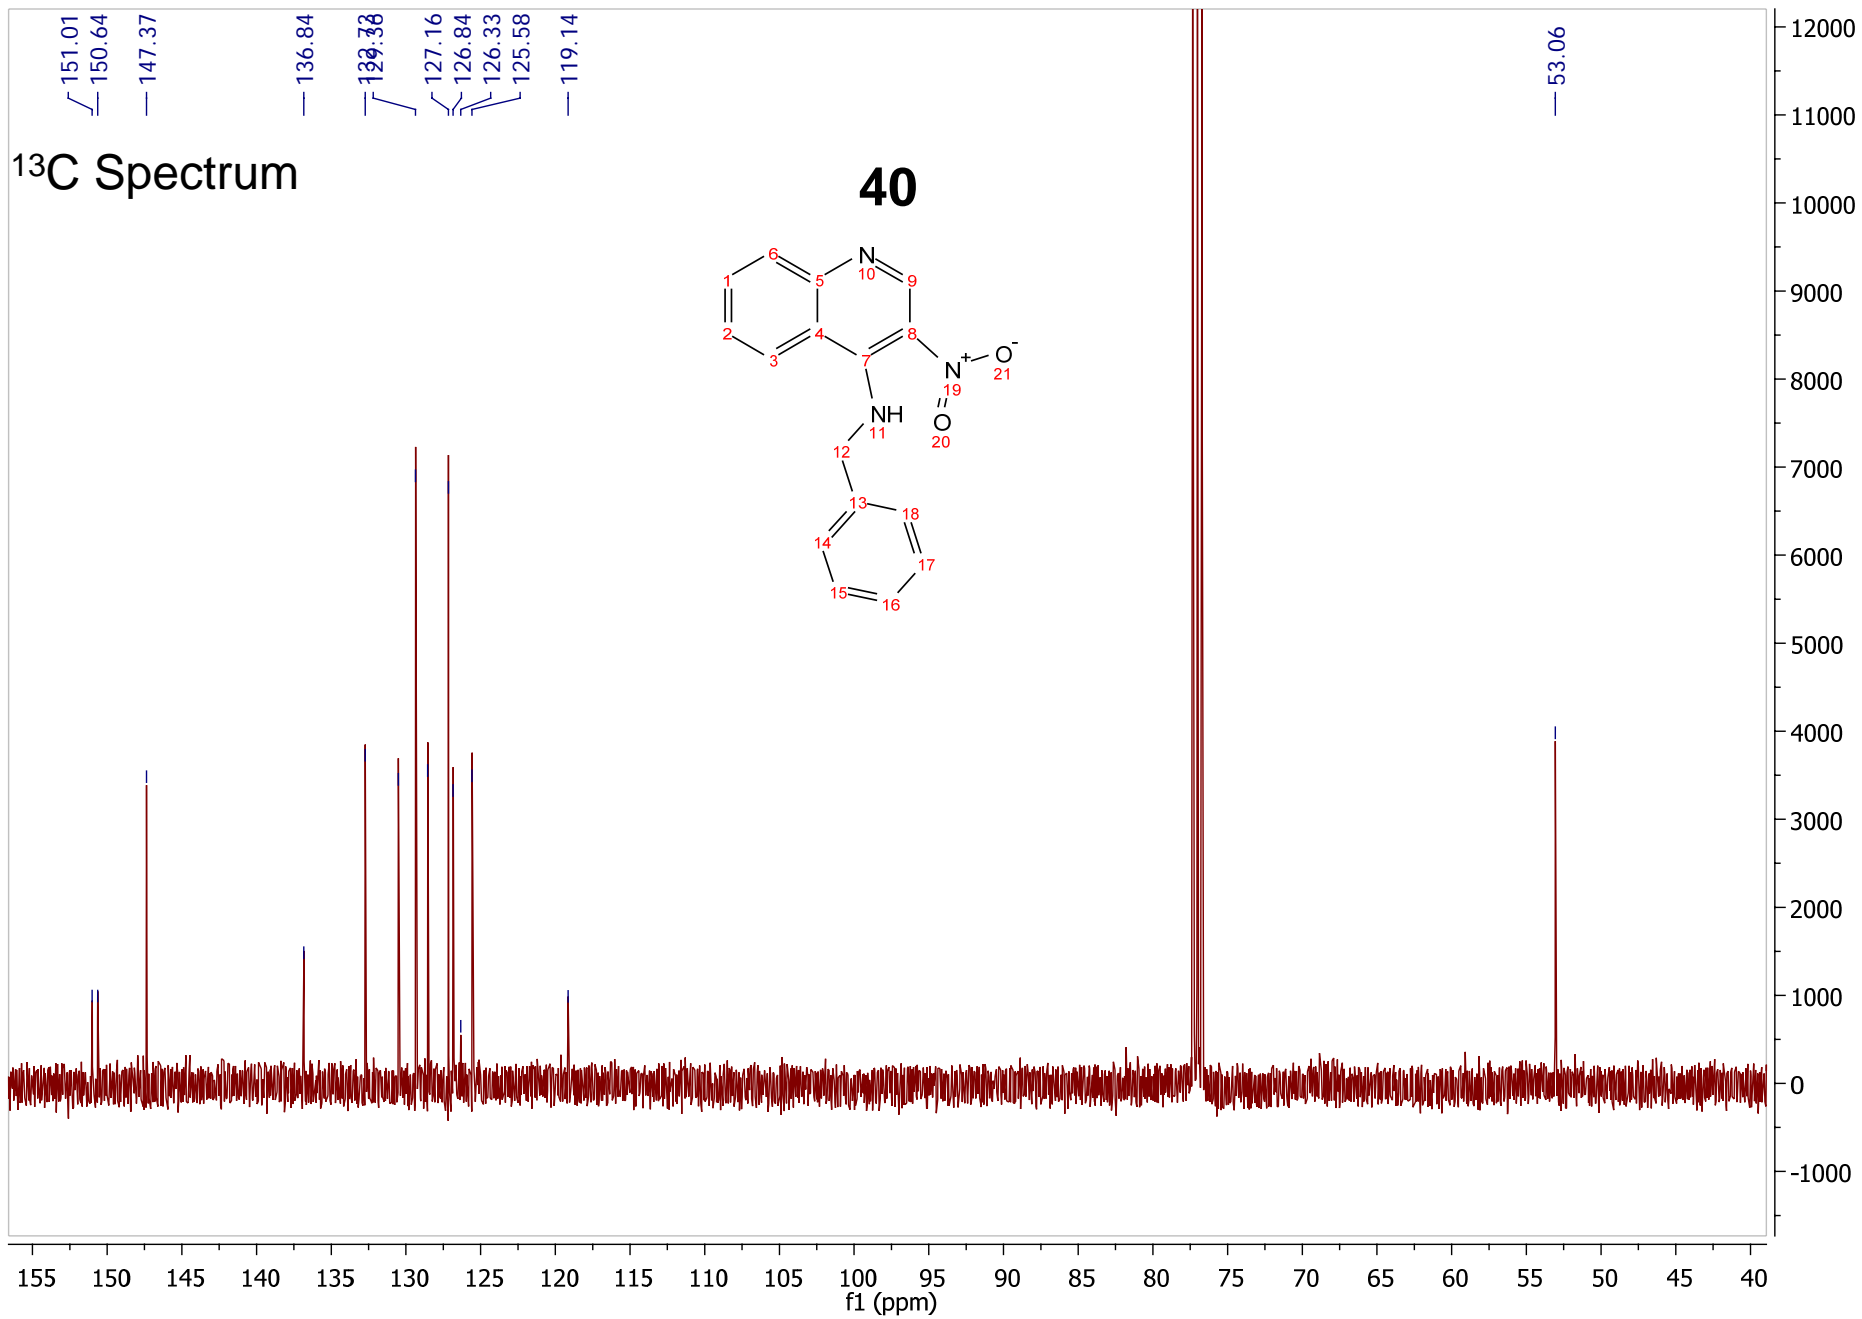

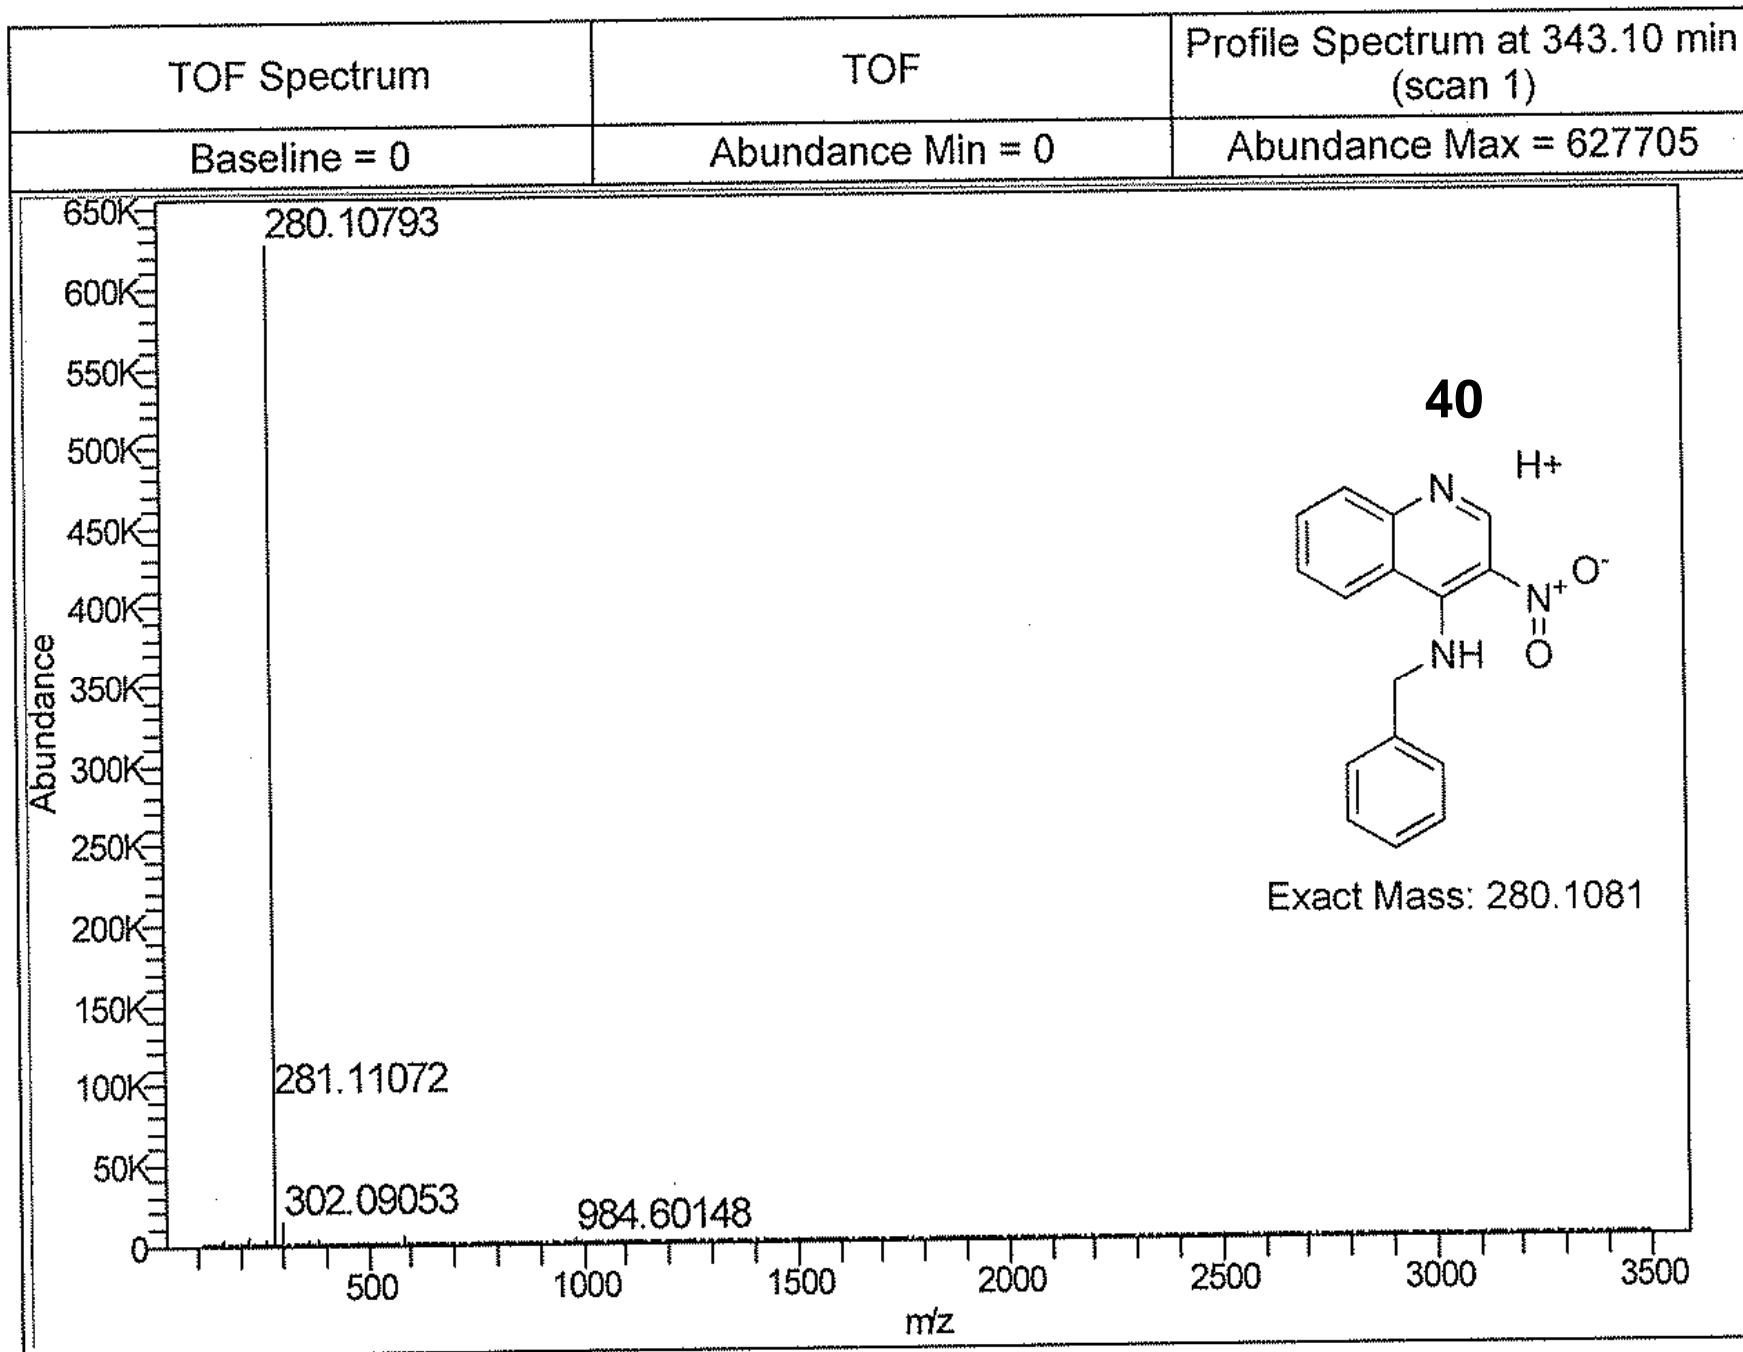

# <sup>1</sup>H Spectrum

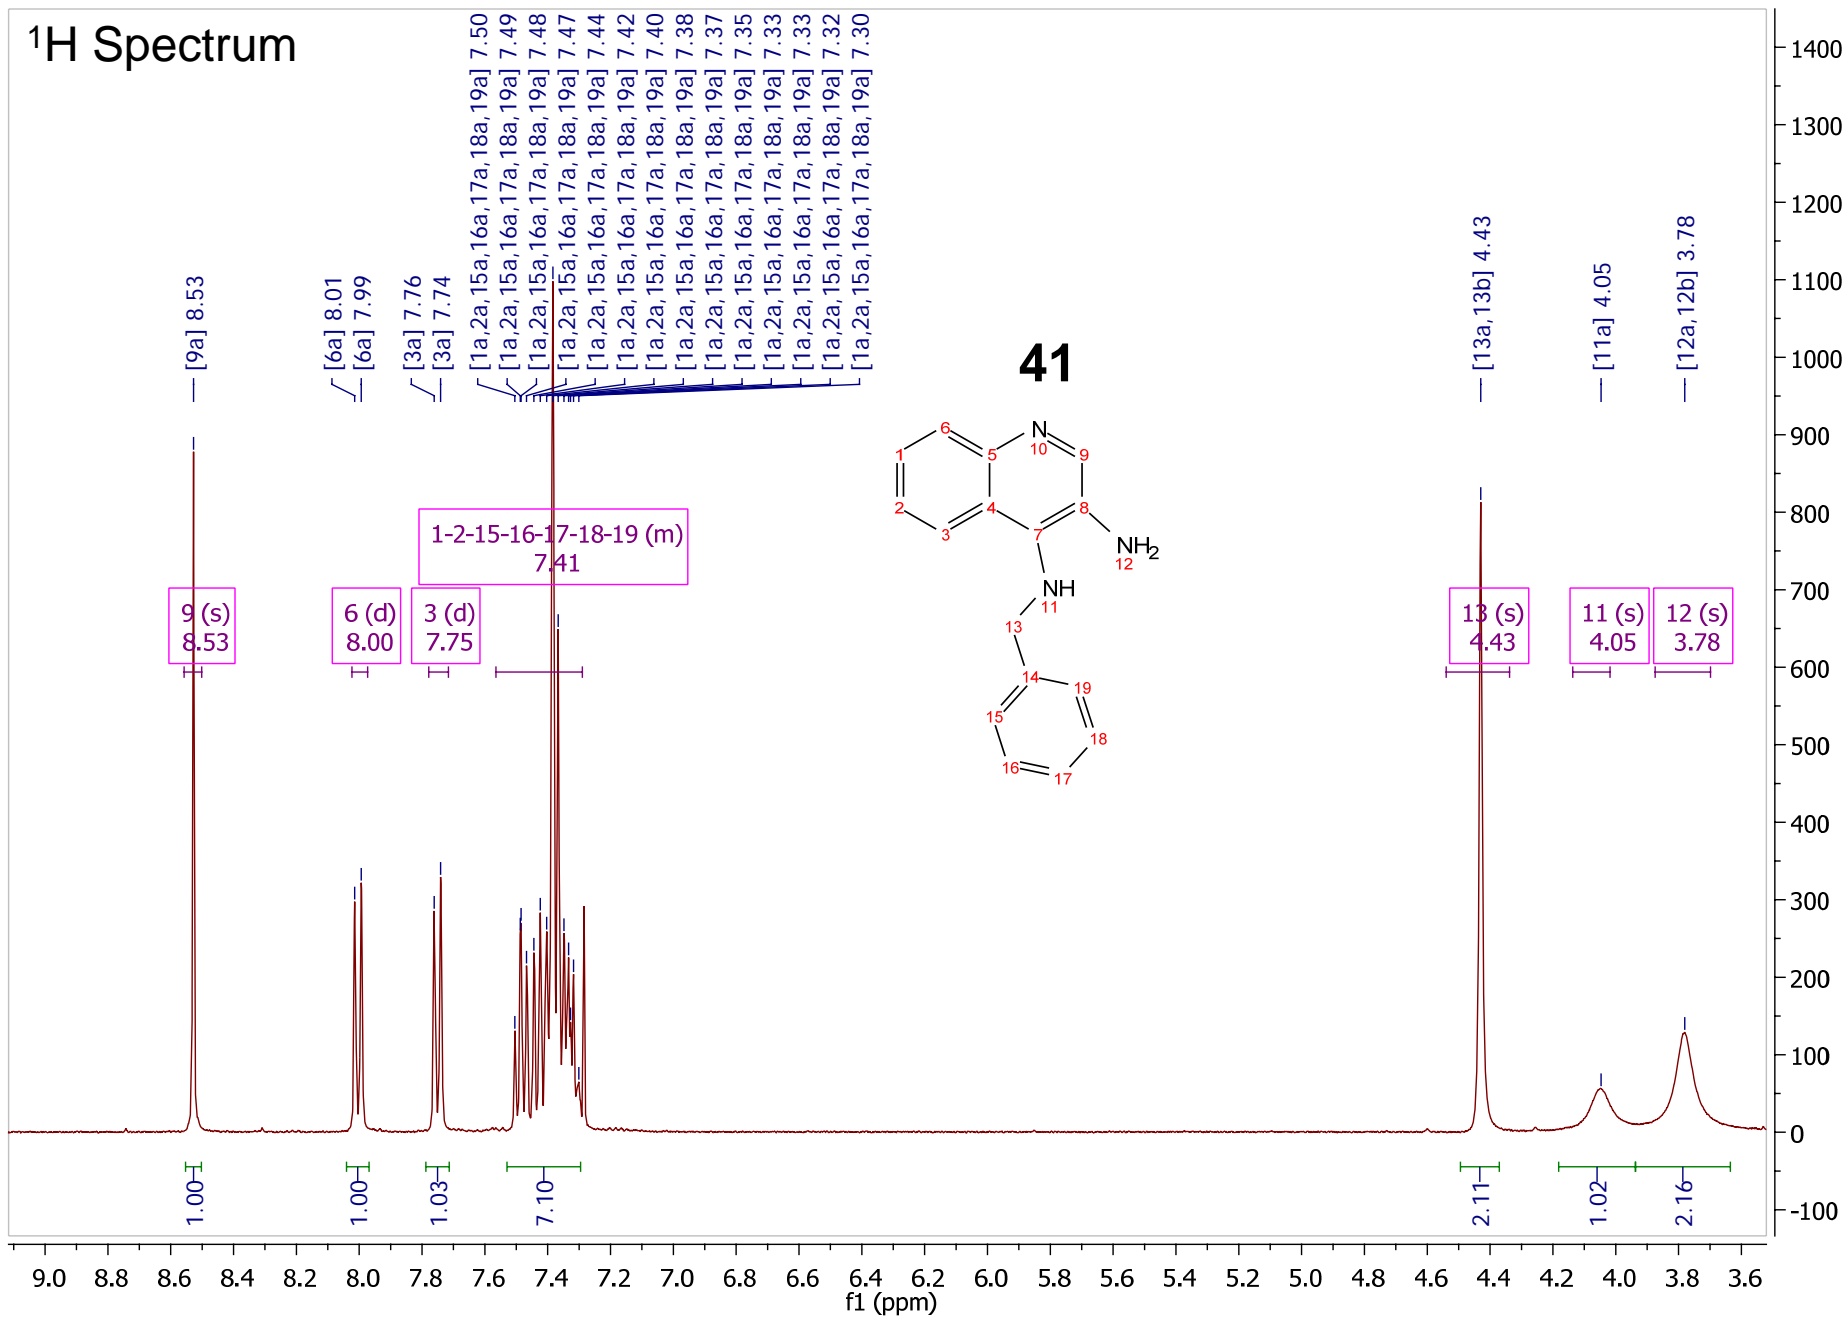

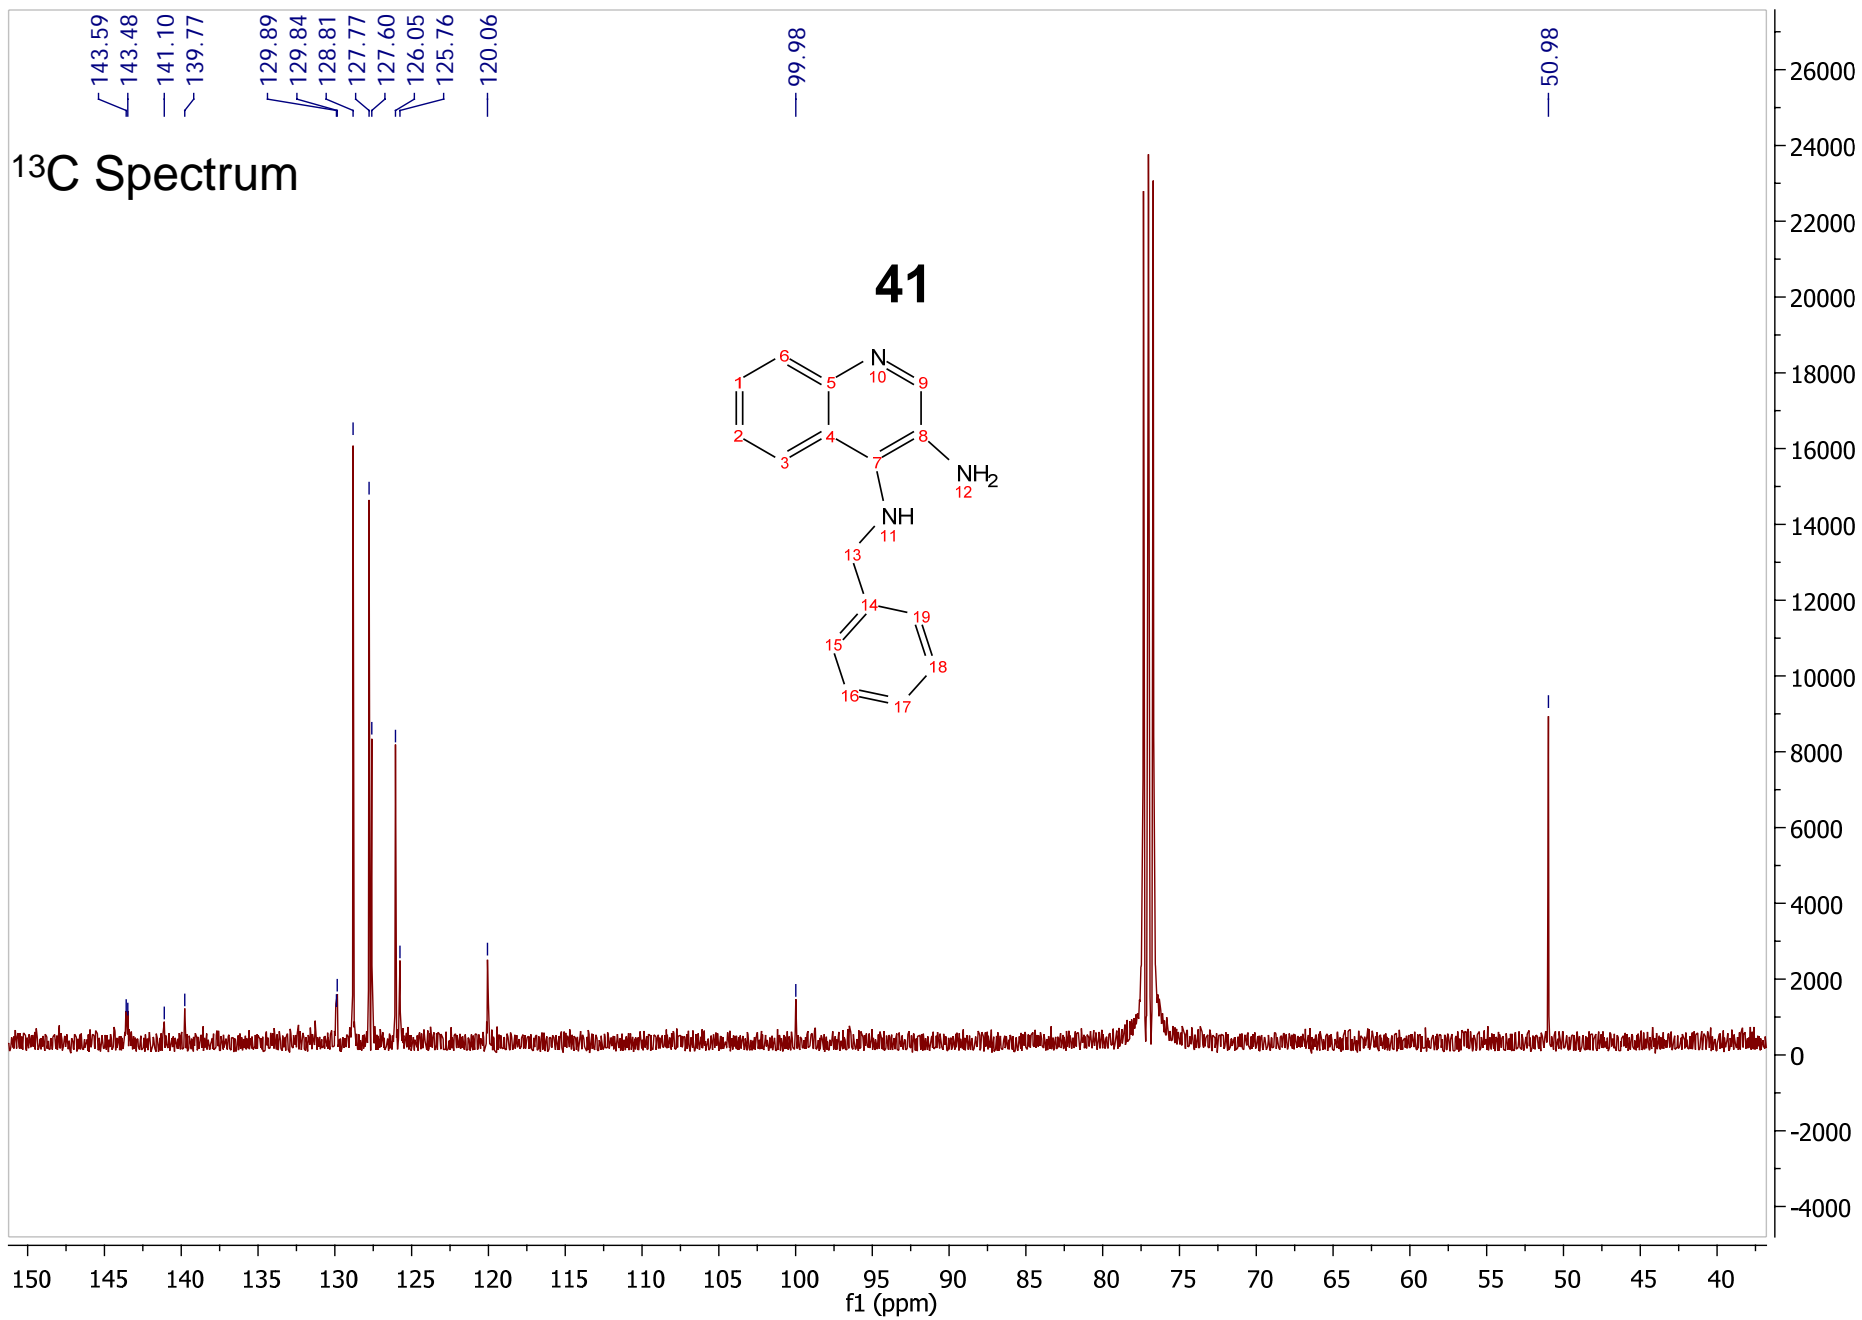



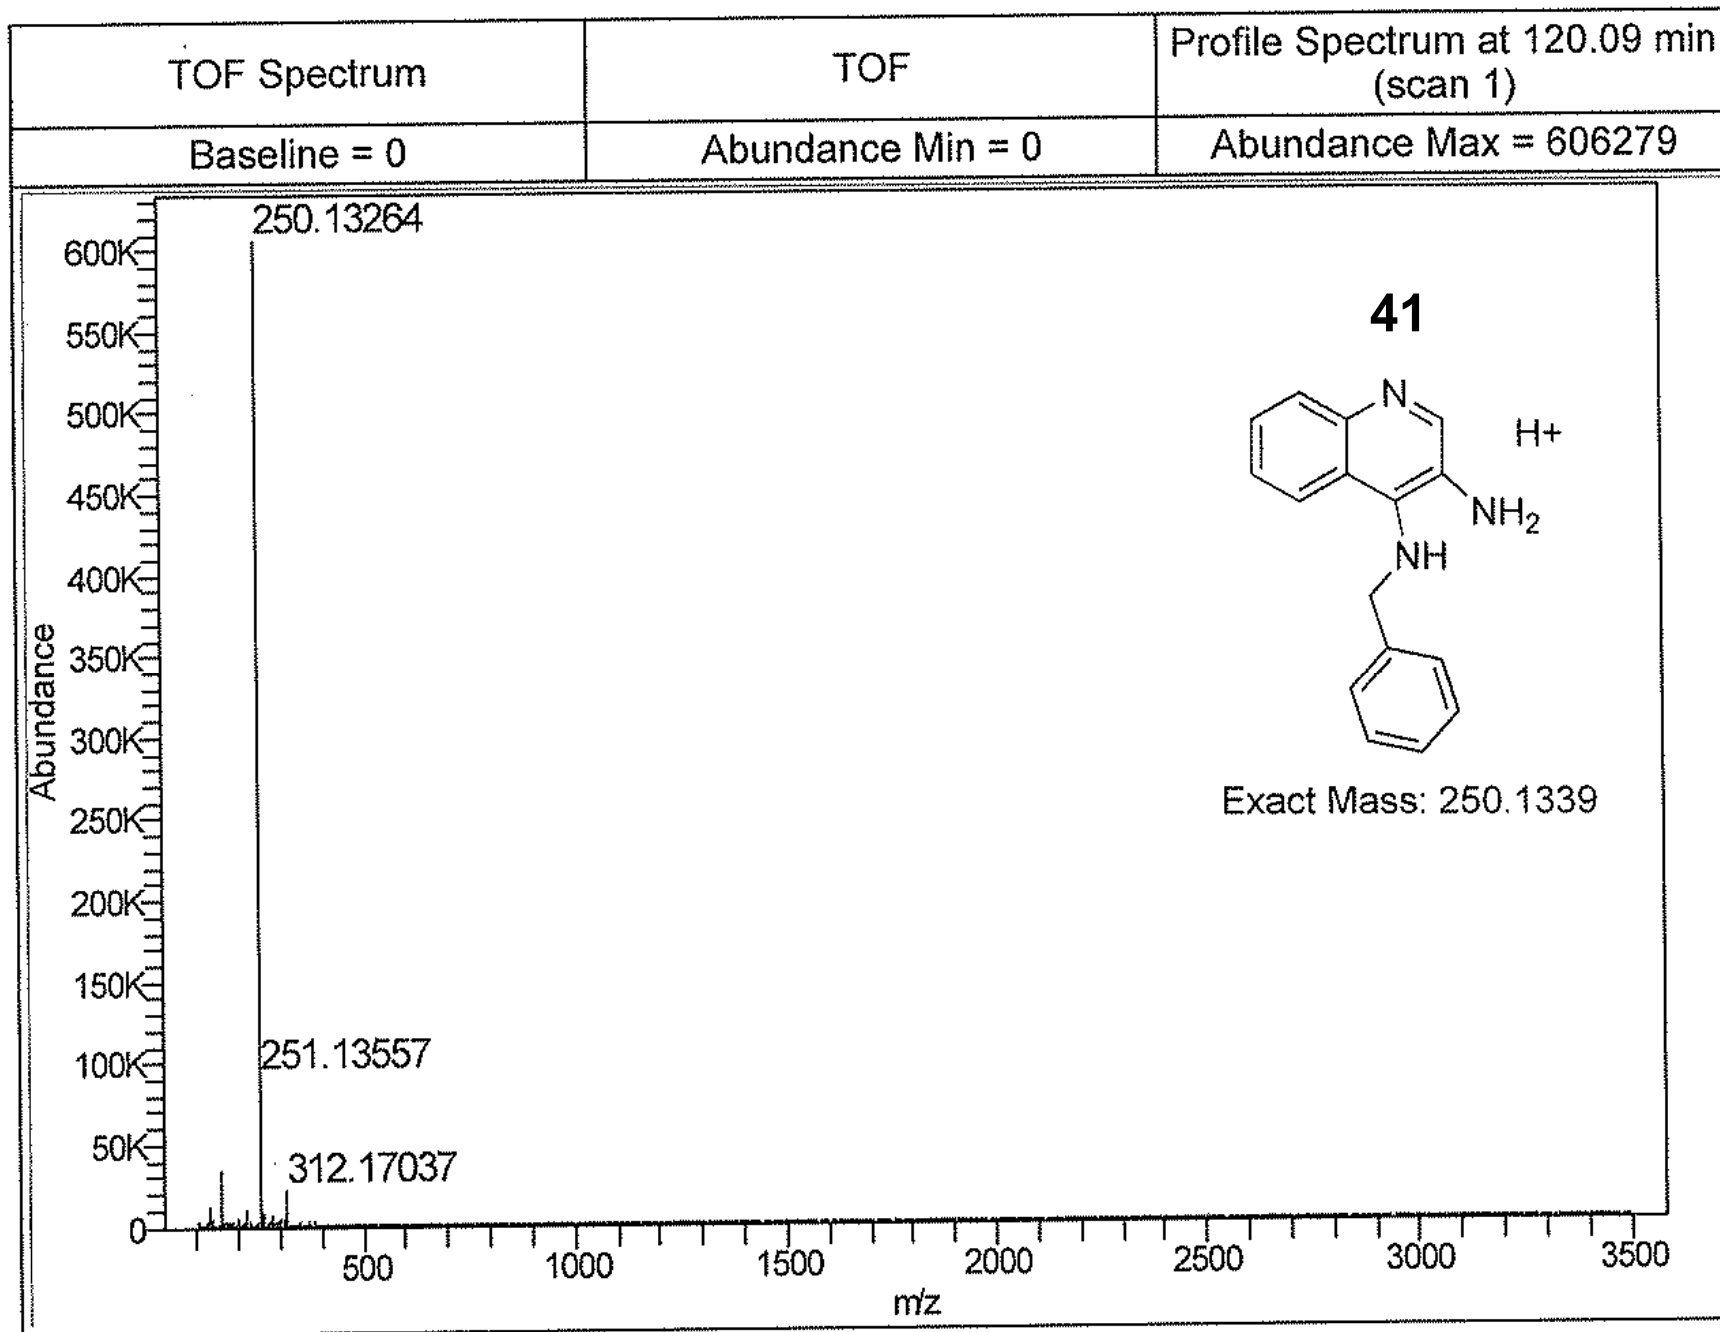

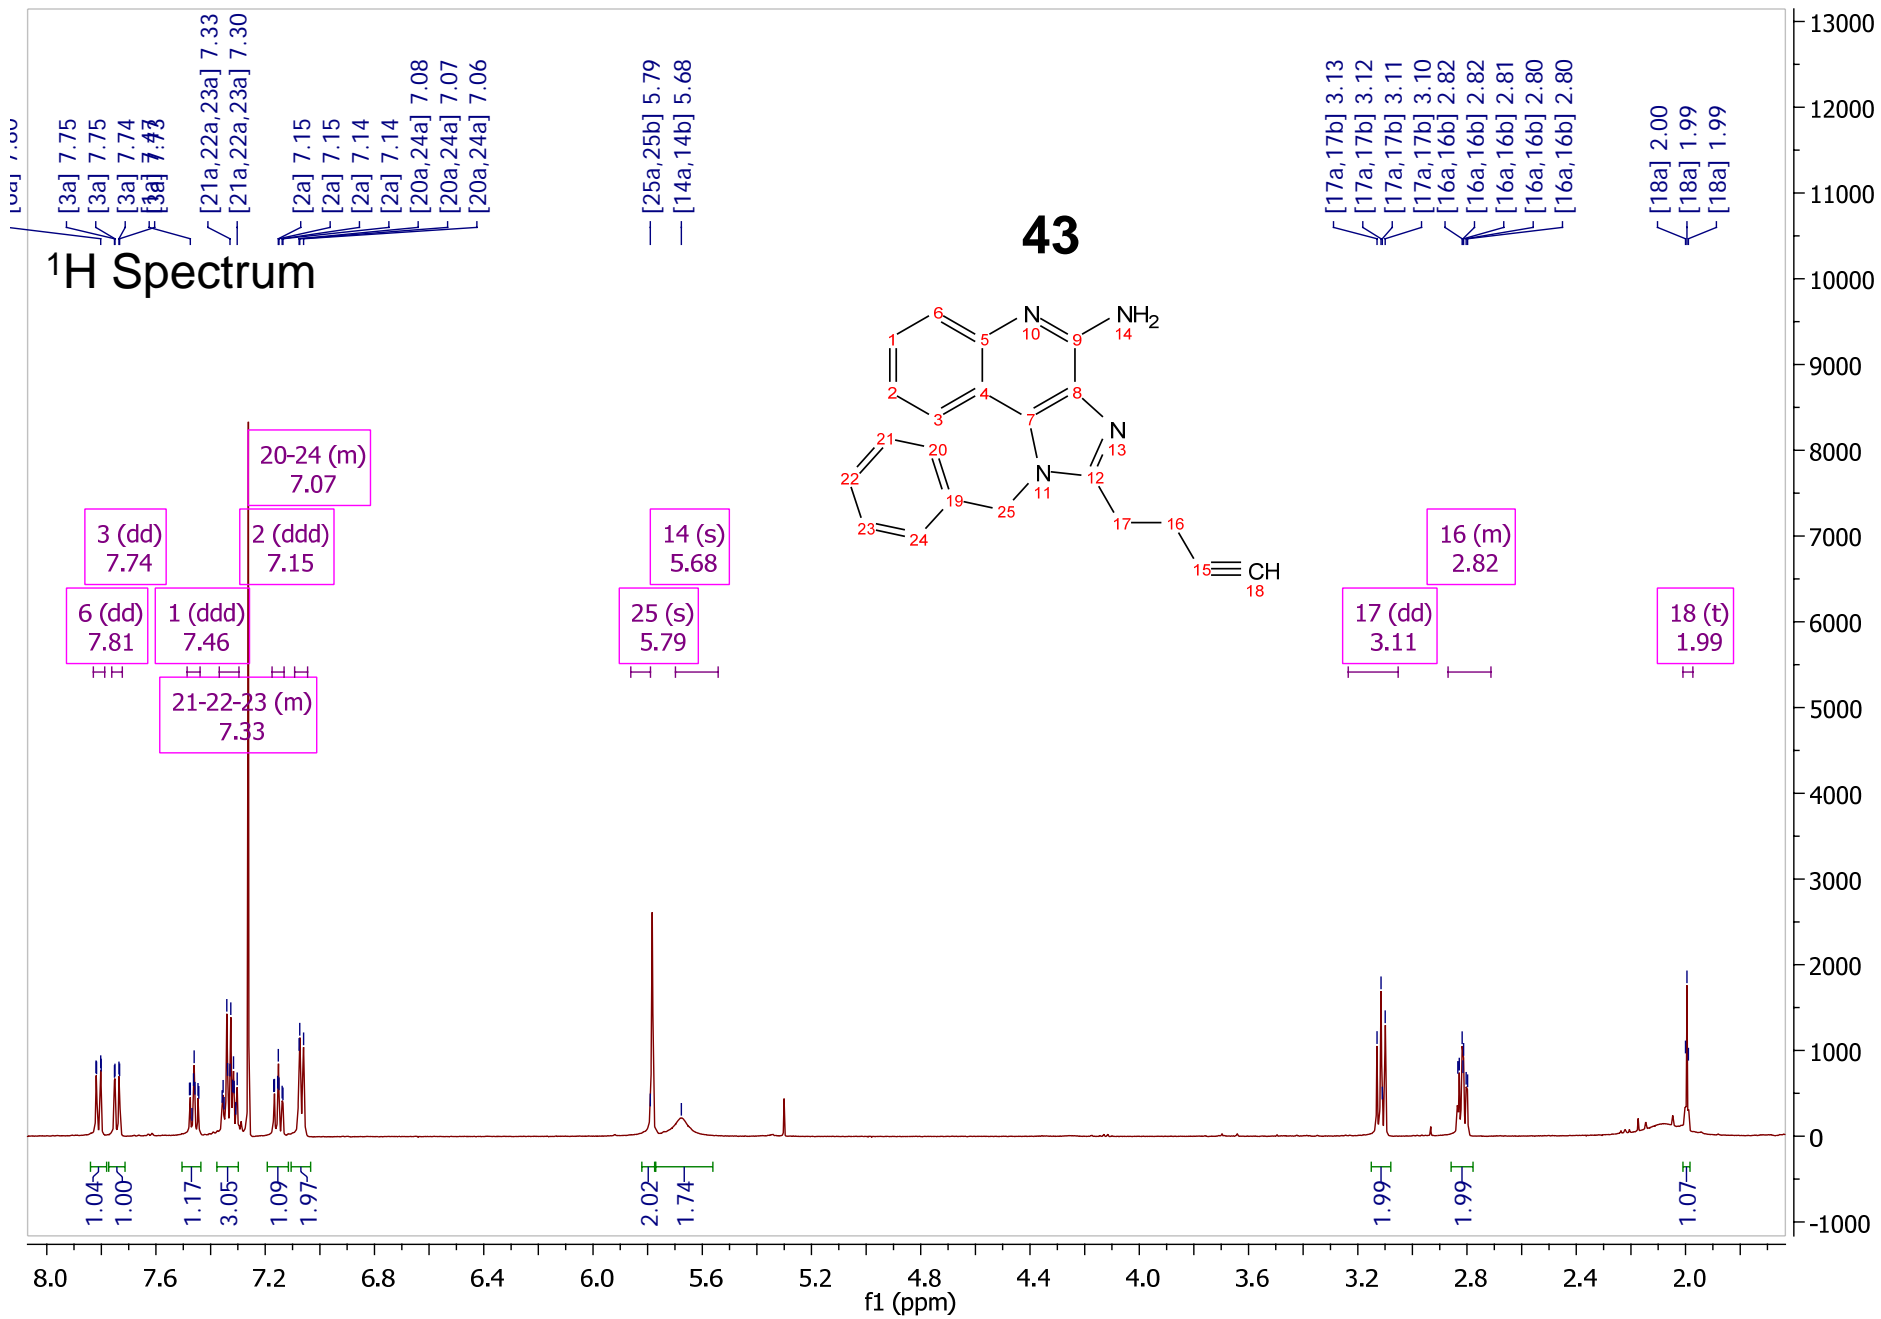

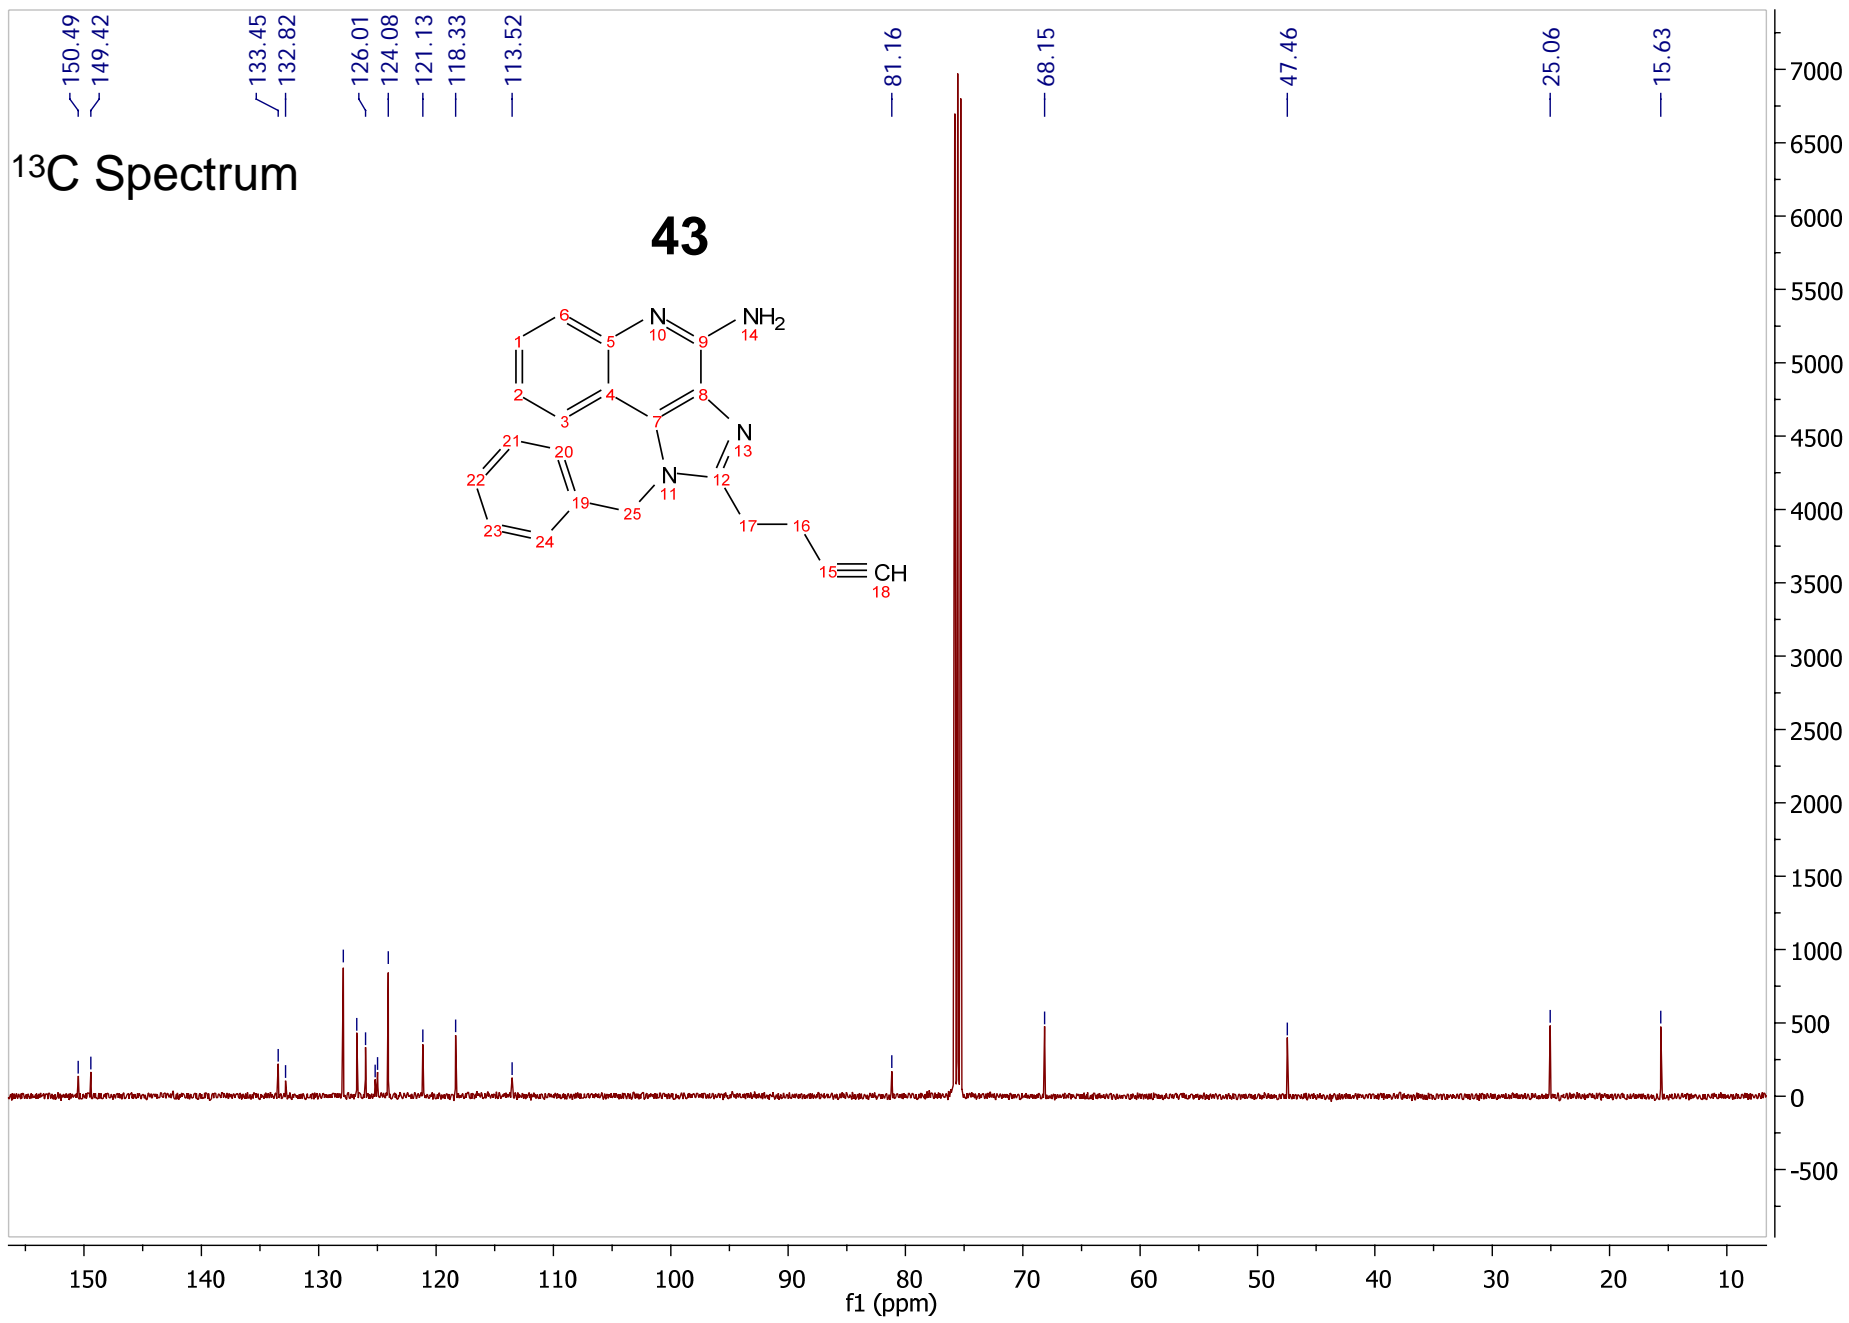

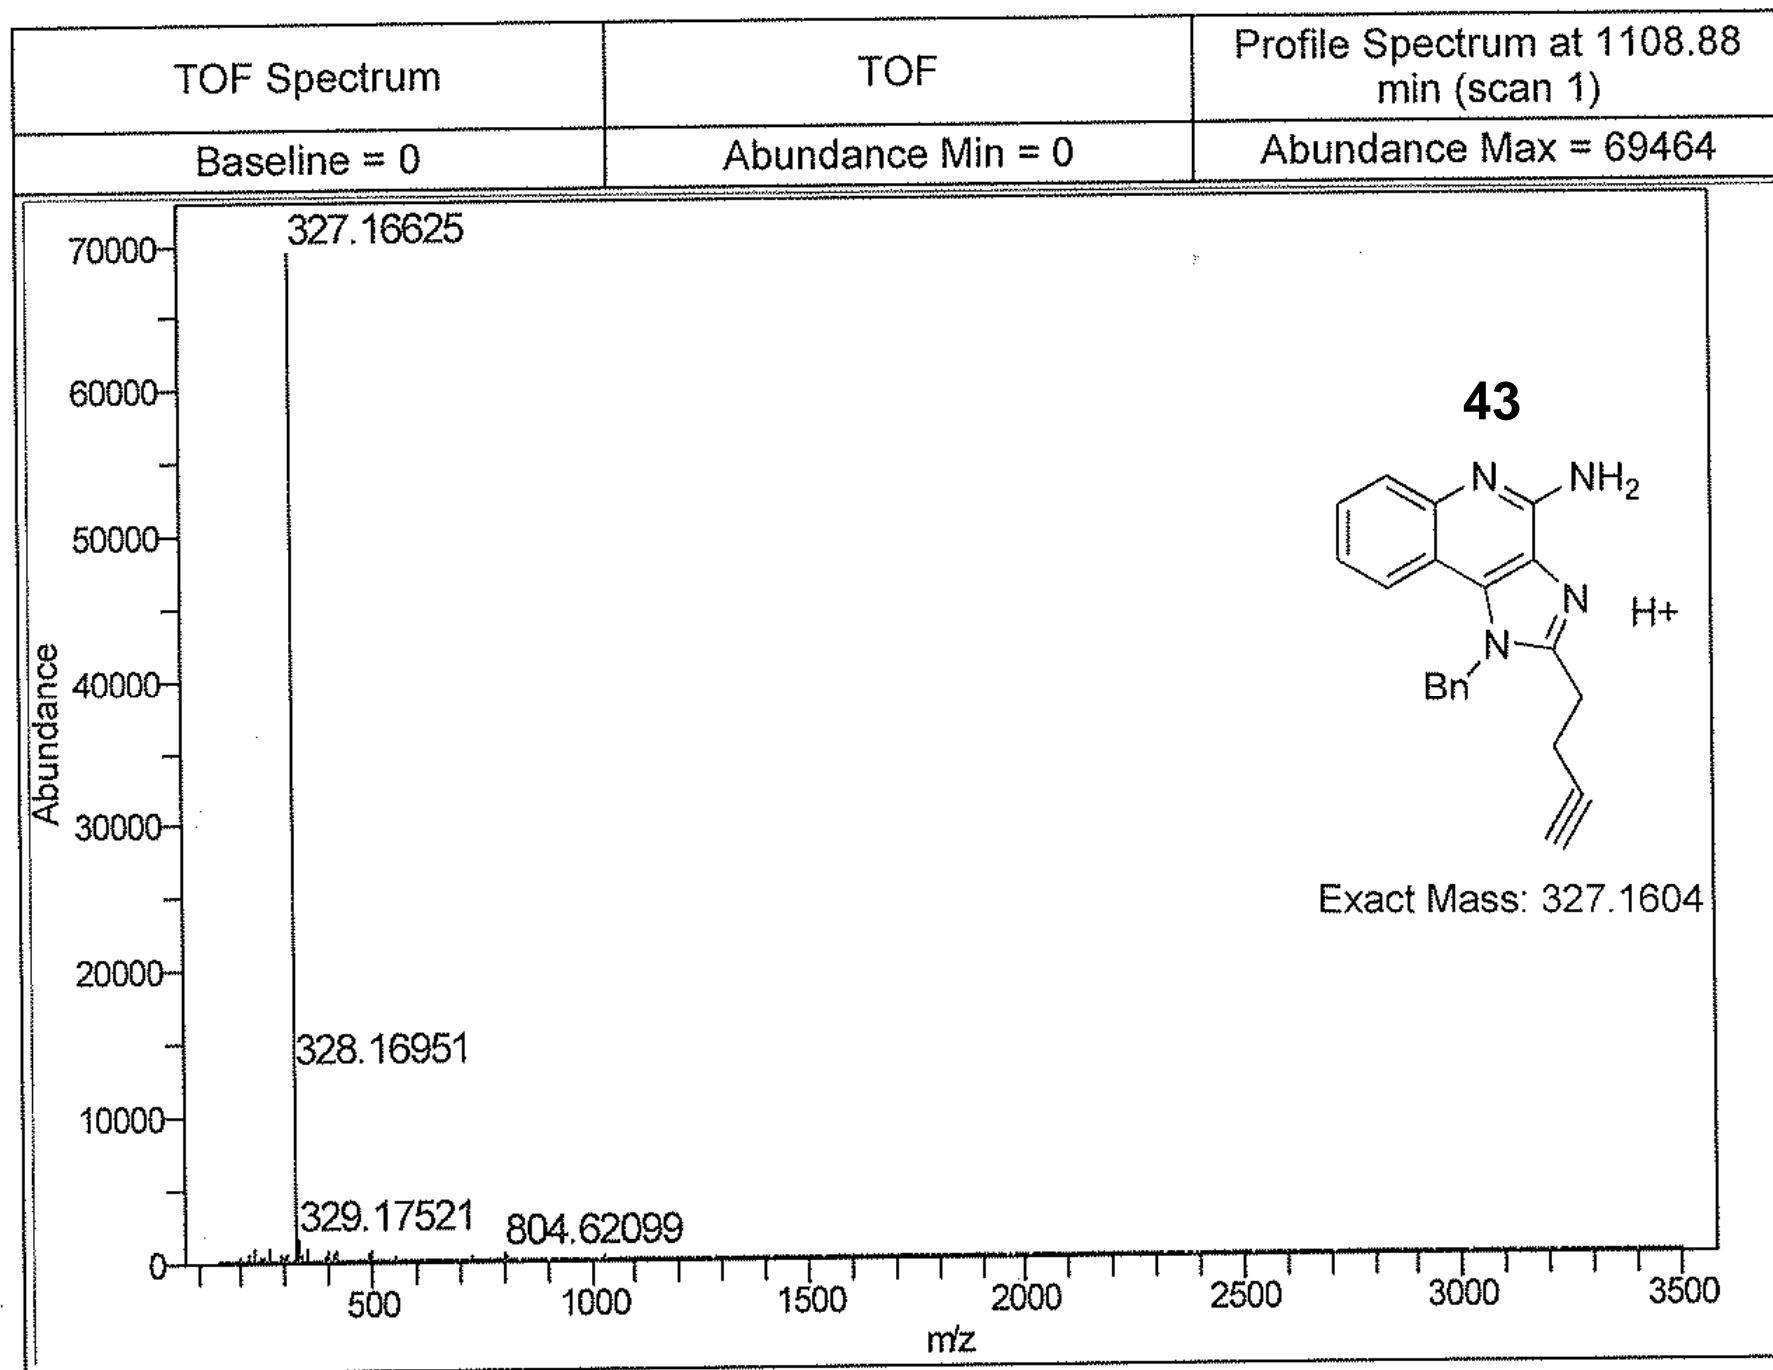

# <sup>1</sup>H Spectrum

44

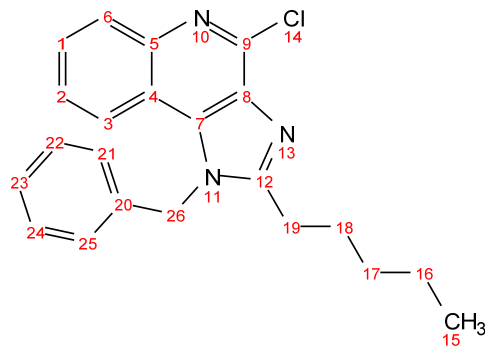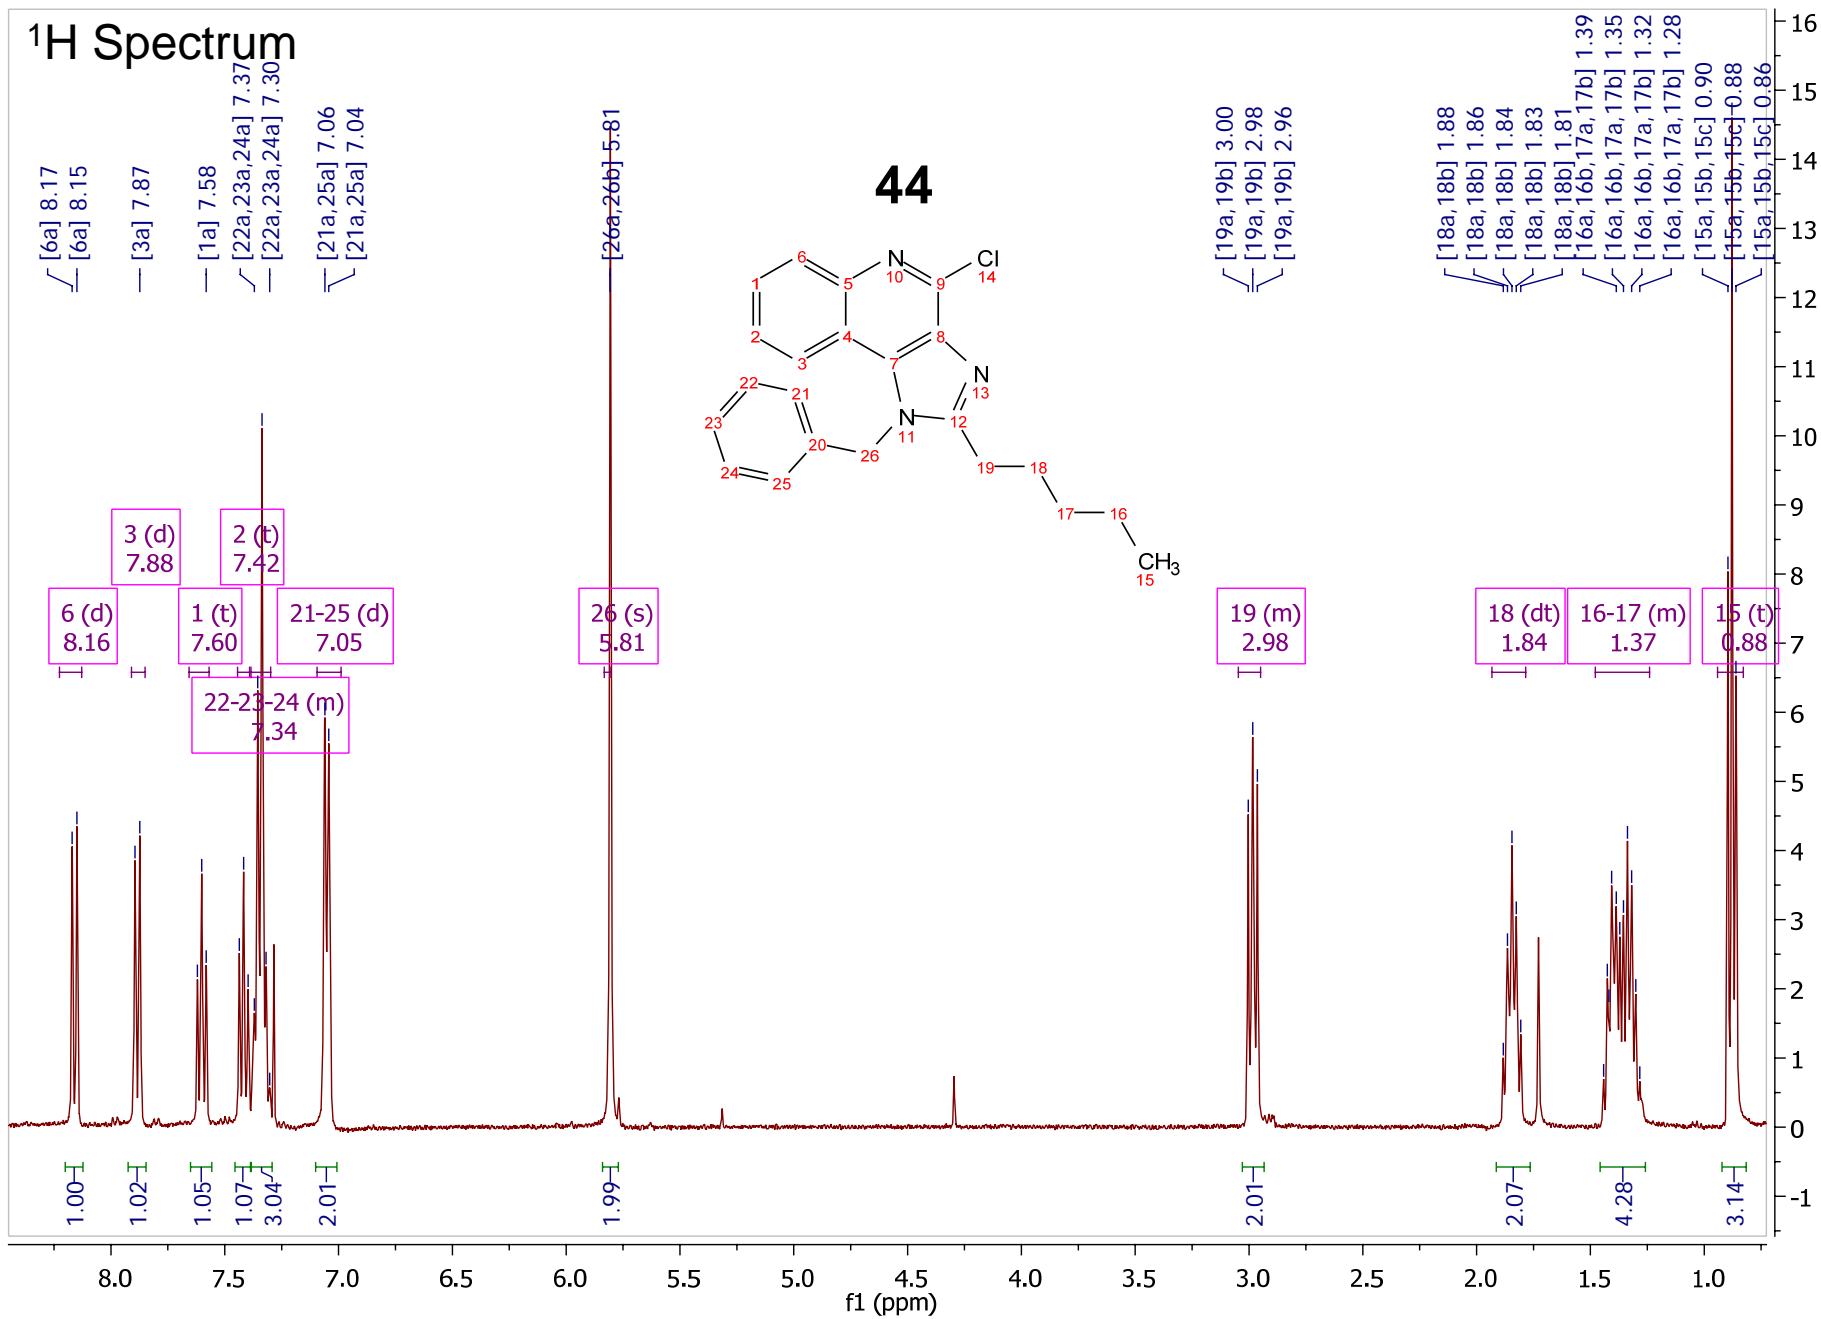

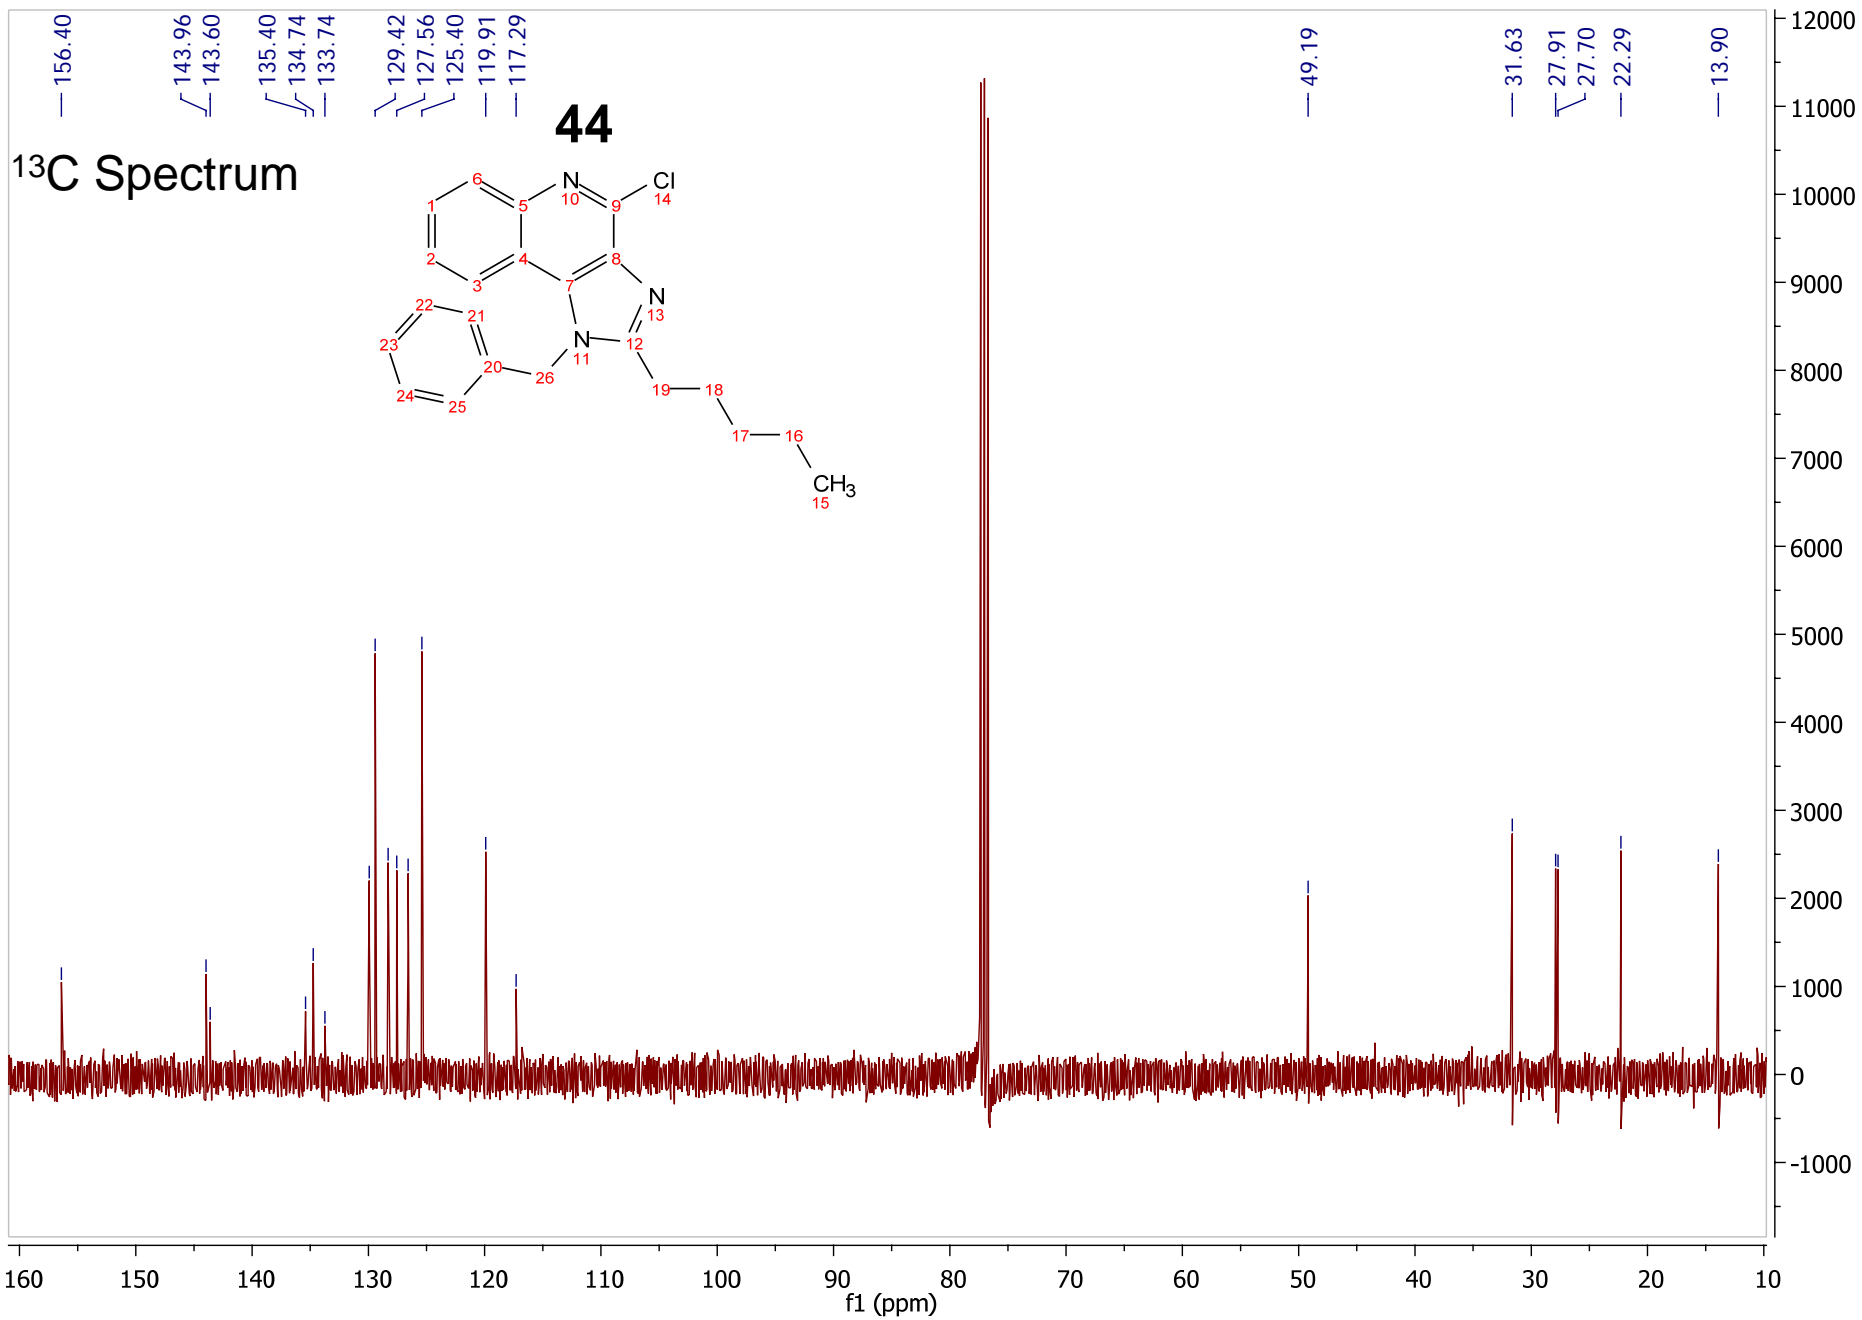

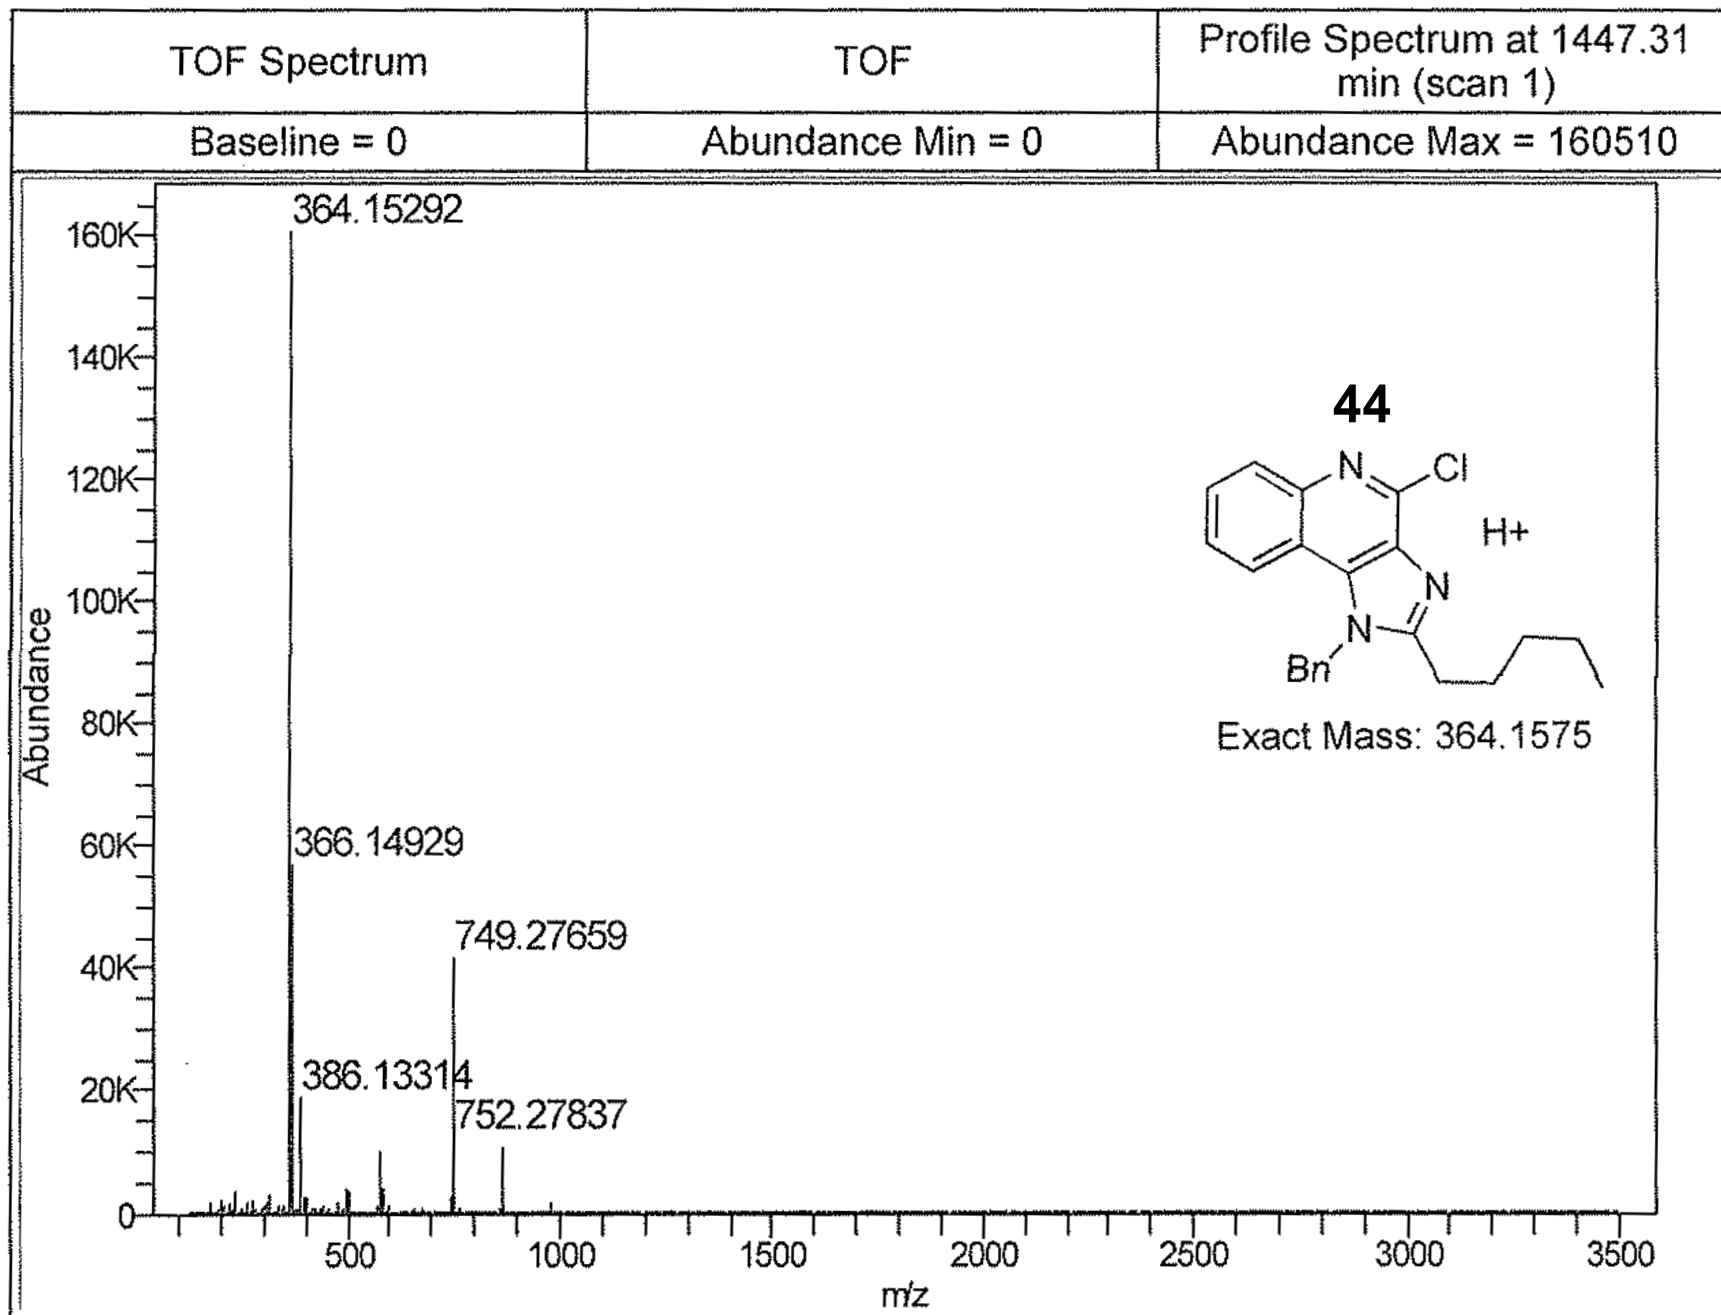

# <sup>1</sup>H Spectrum

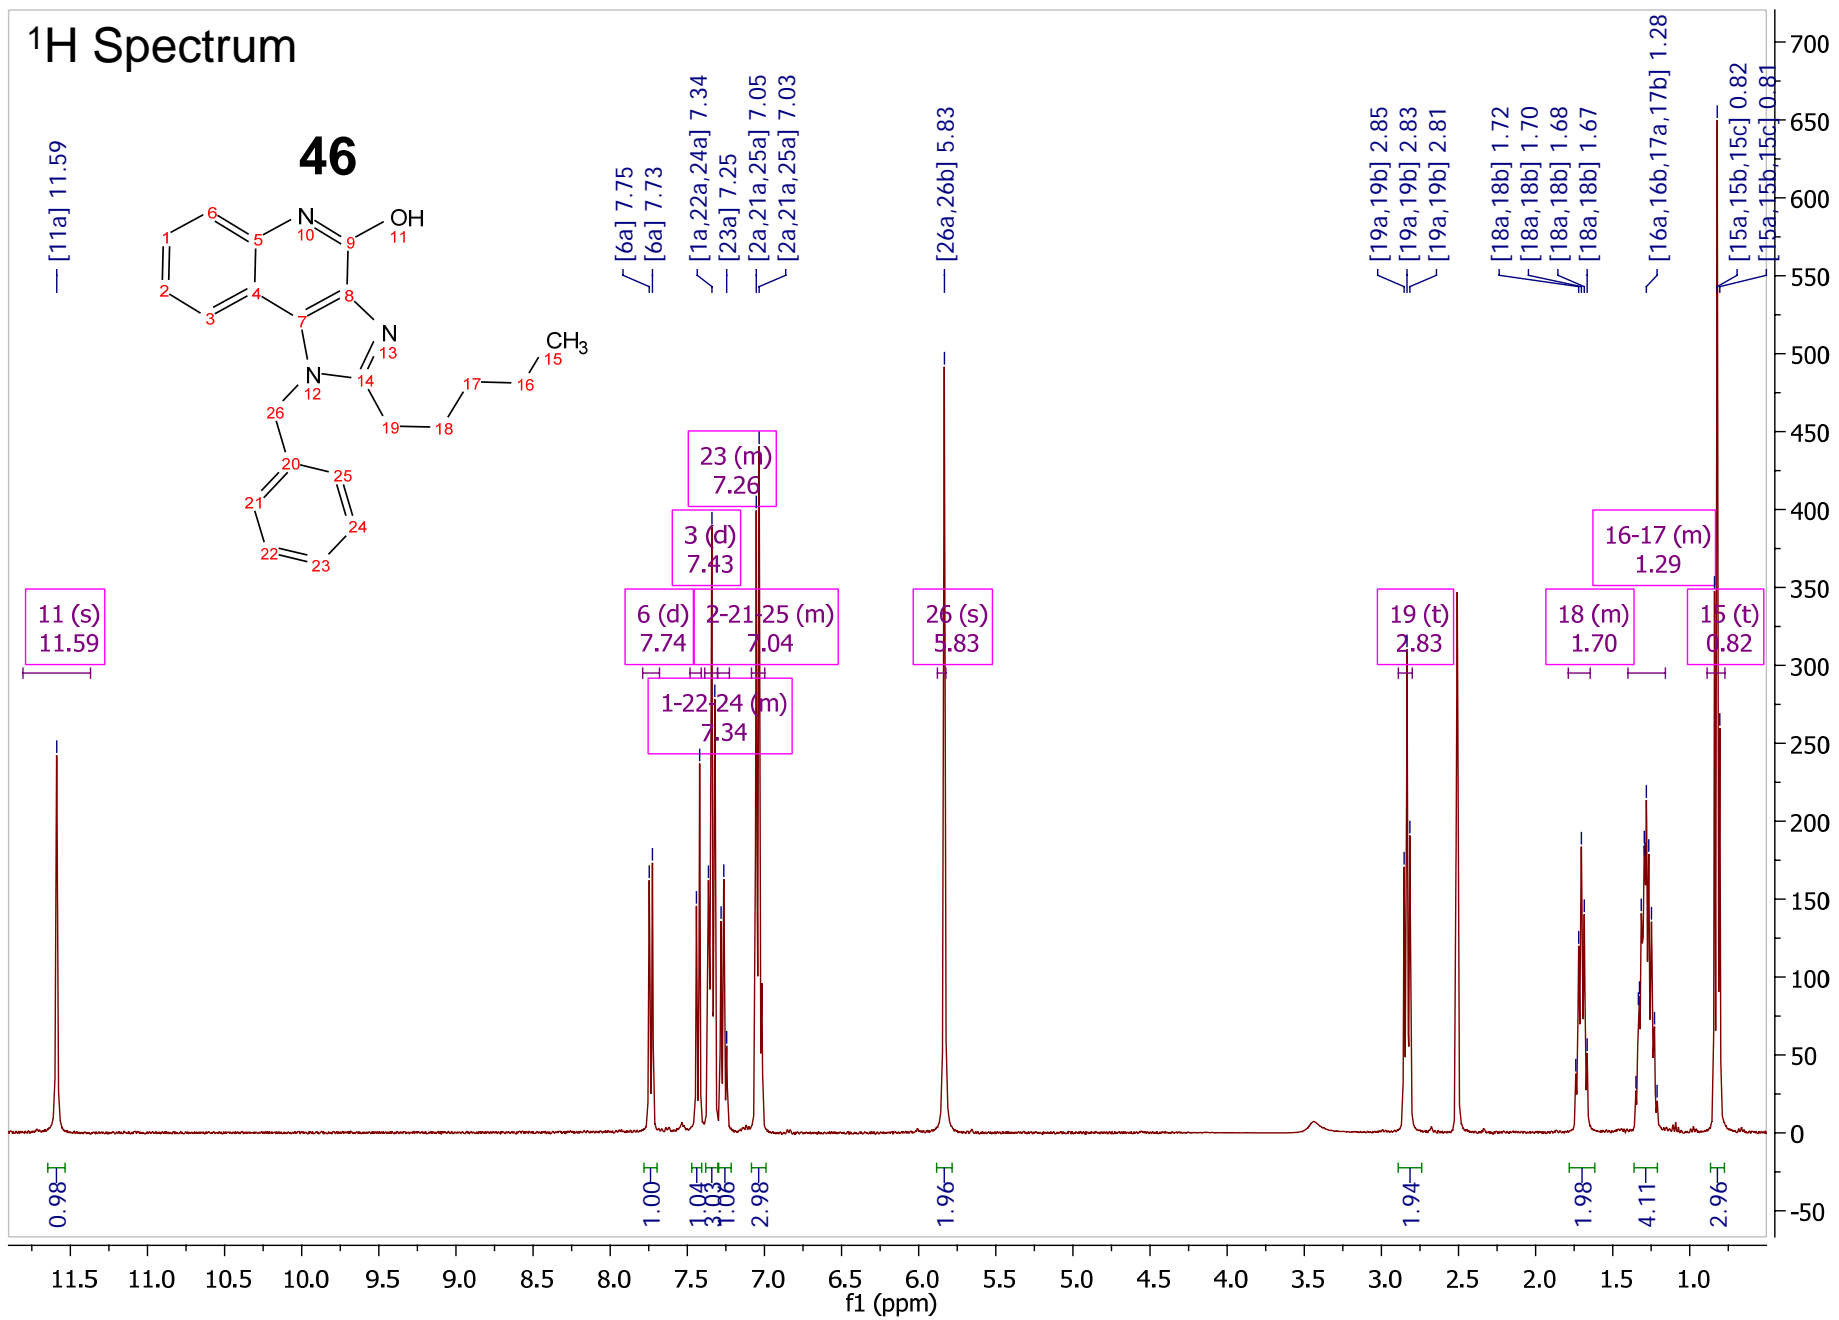



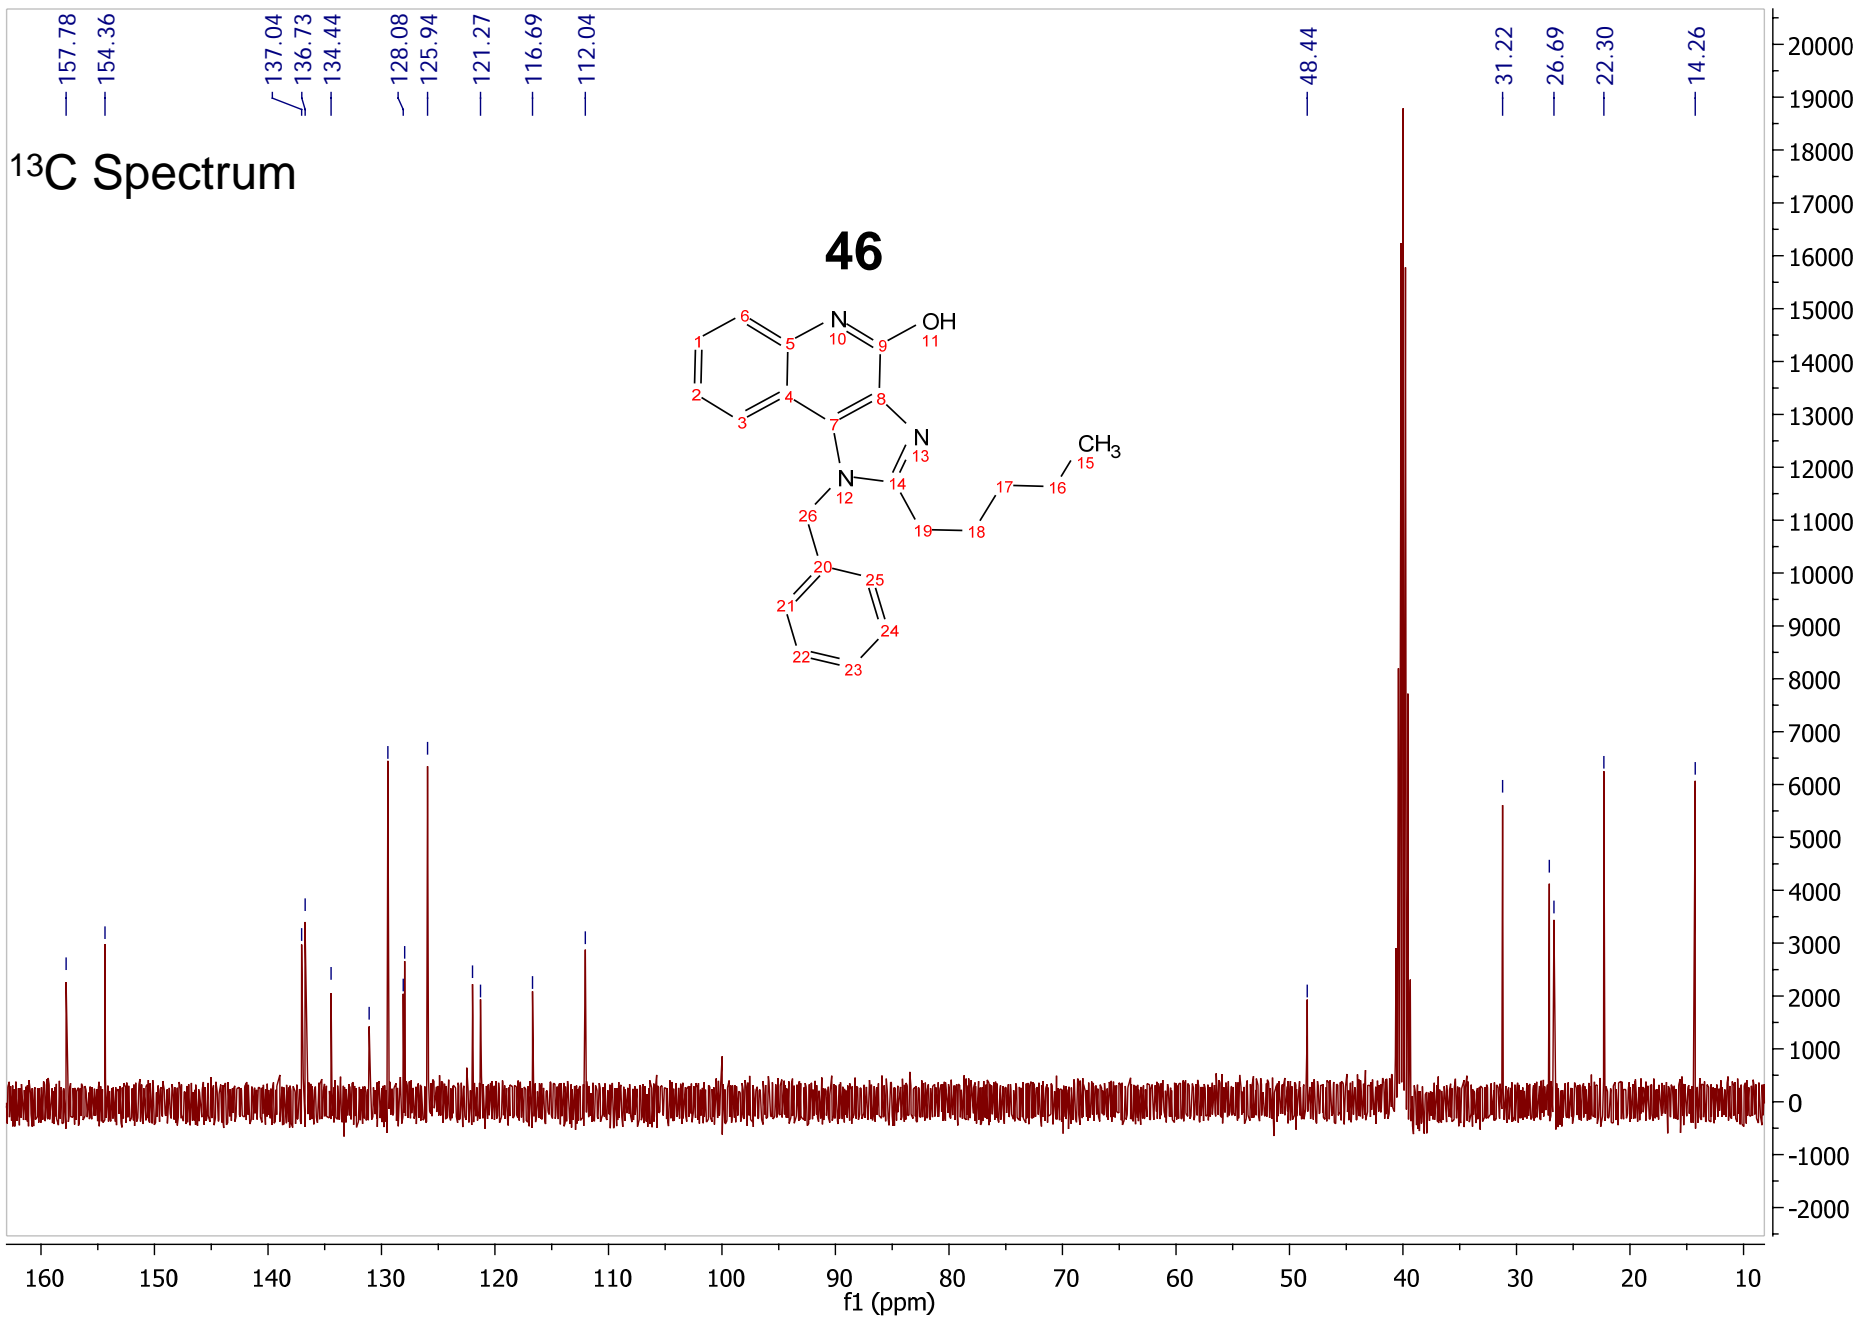

|              |                   |                                            |
|--------------|-------------------|--------------------------------------------|
| TOF Spectrum | TOF               | Profile Spectrum at 171.60 min<br>(scan 1) |
| Baseline = 0 | Abundance Min = 0 | Abundance Max = 510998                     |

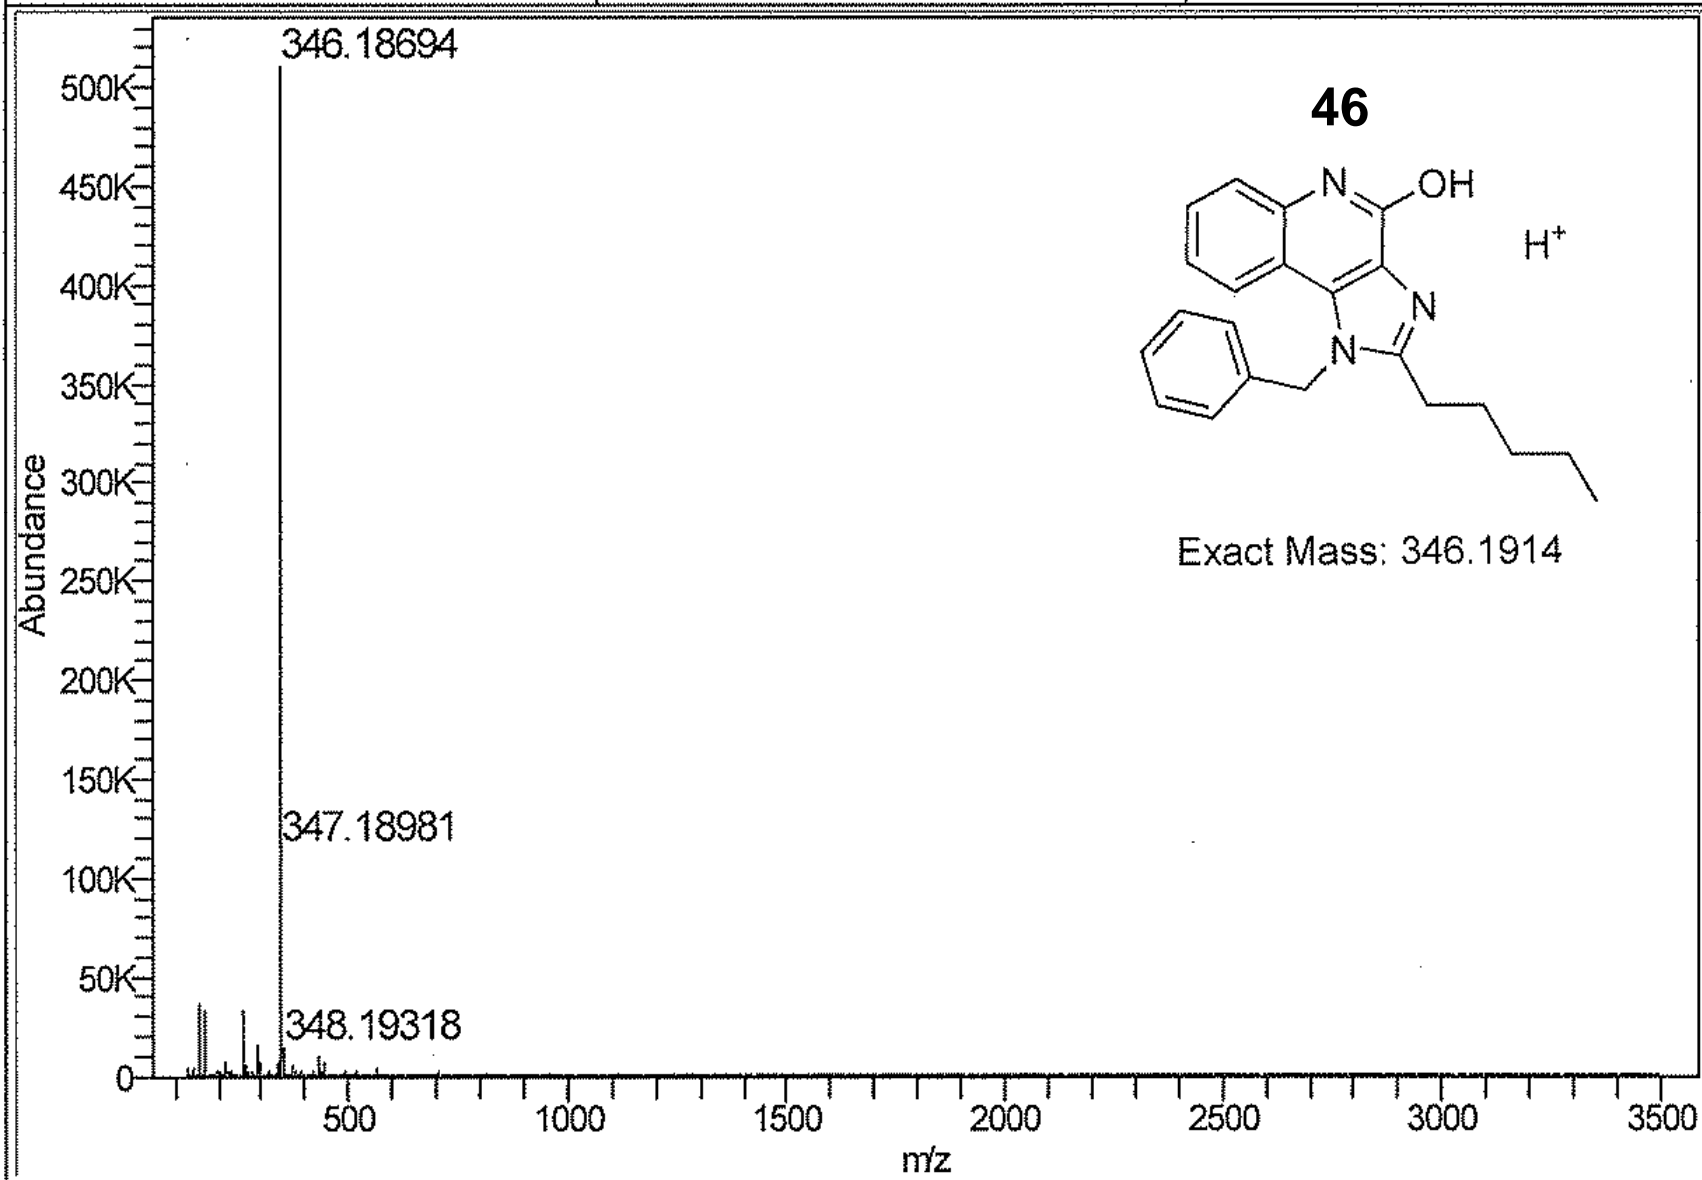

# <sup>1</sup>H Spectrum

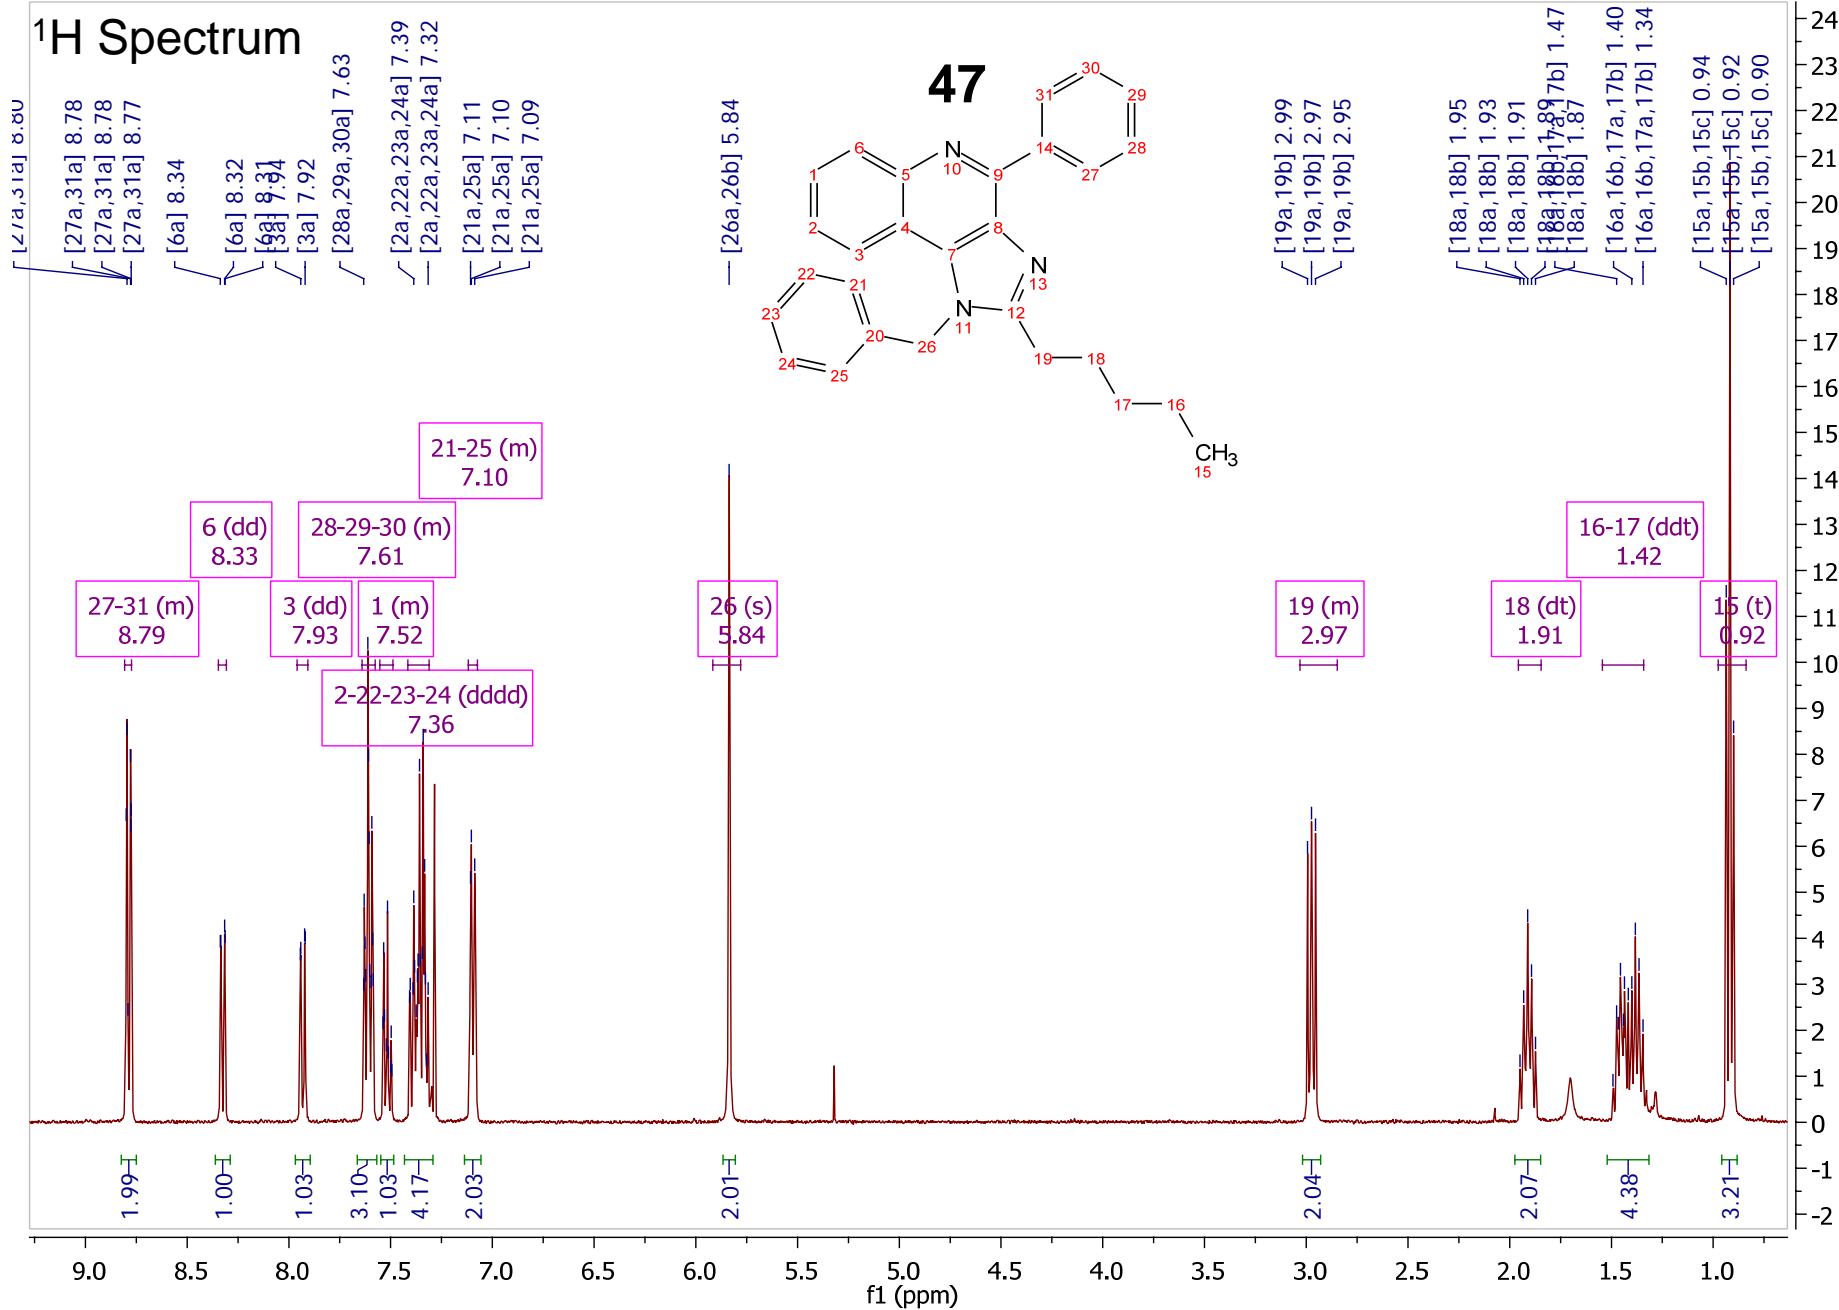

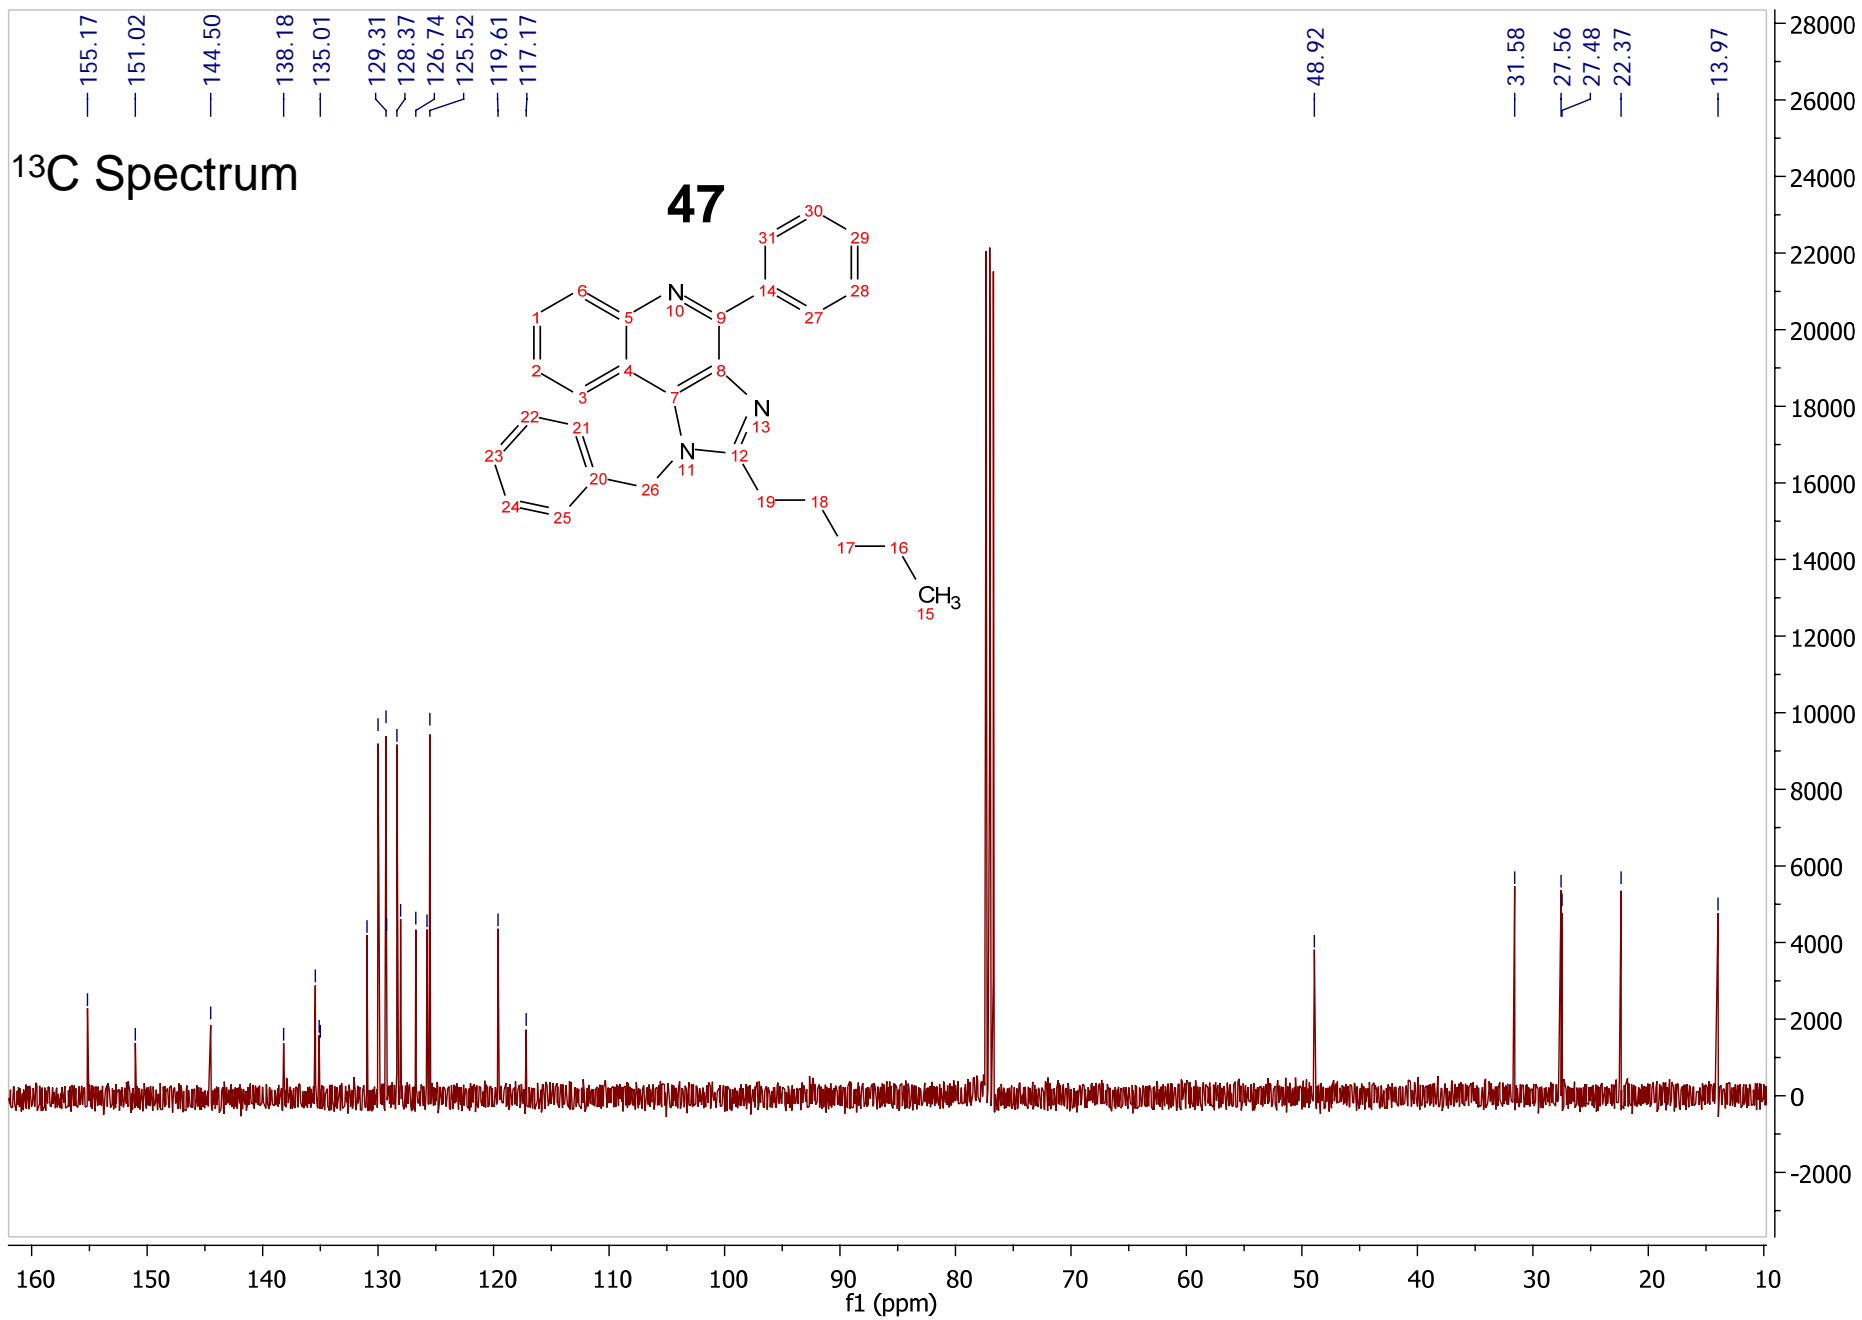

|              |                   |                                           |
|--------------|-------------------|-------------------------------------------|
| TOF Spectrum | TOF               | Profile Spectrum at 33288.63 min (scan 1) |
| Baseline = 0 | Abundance Min = 0 | Abundance Max = 786367                    |

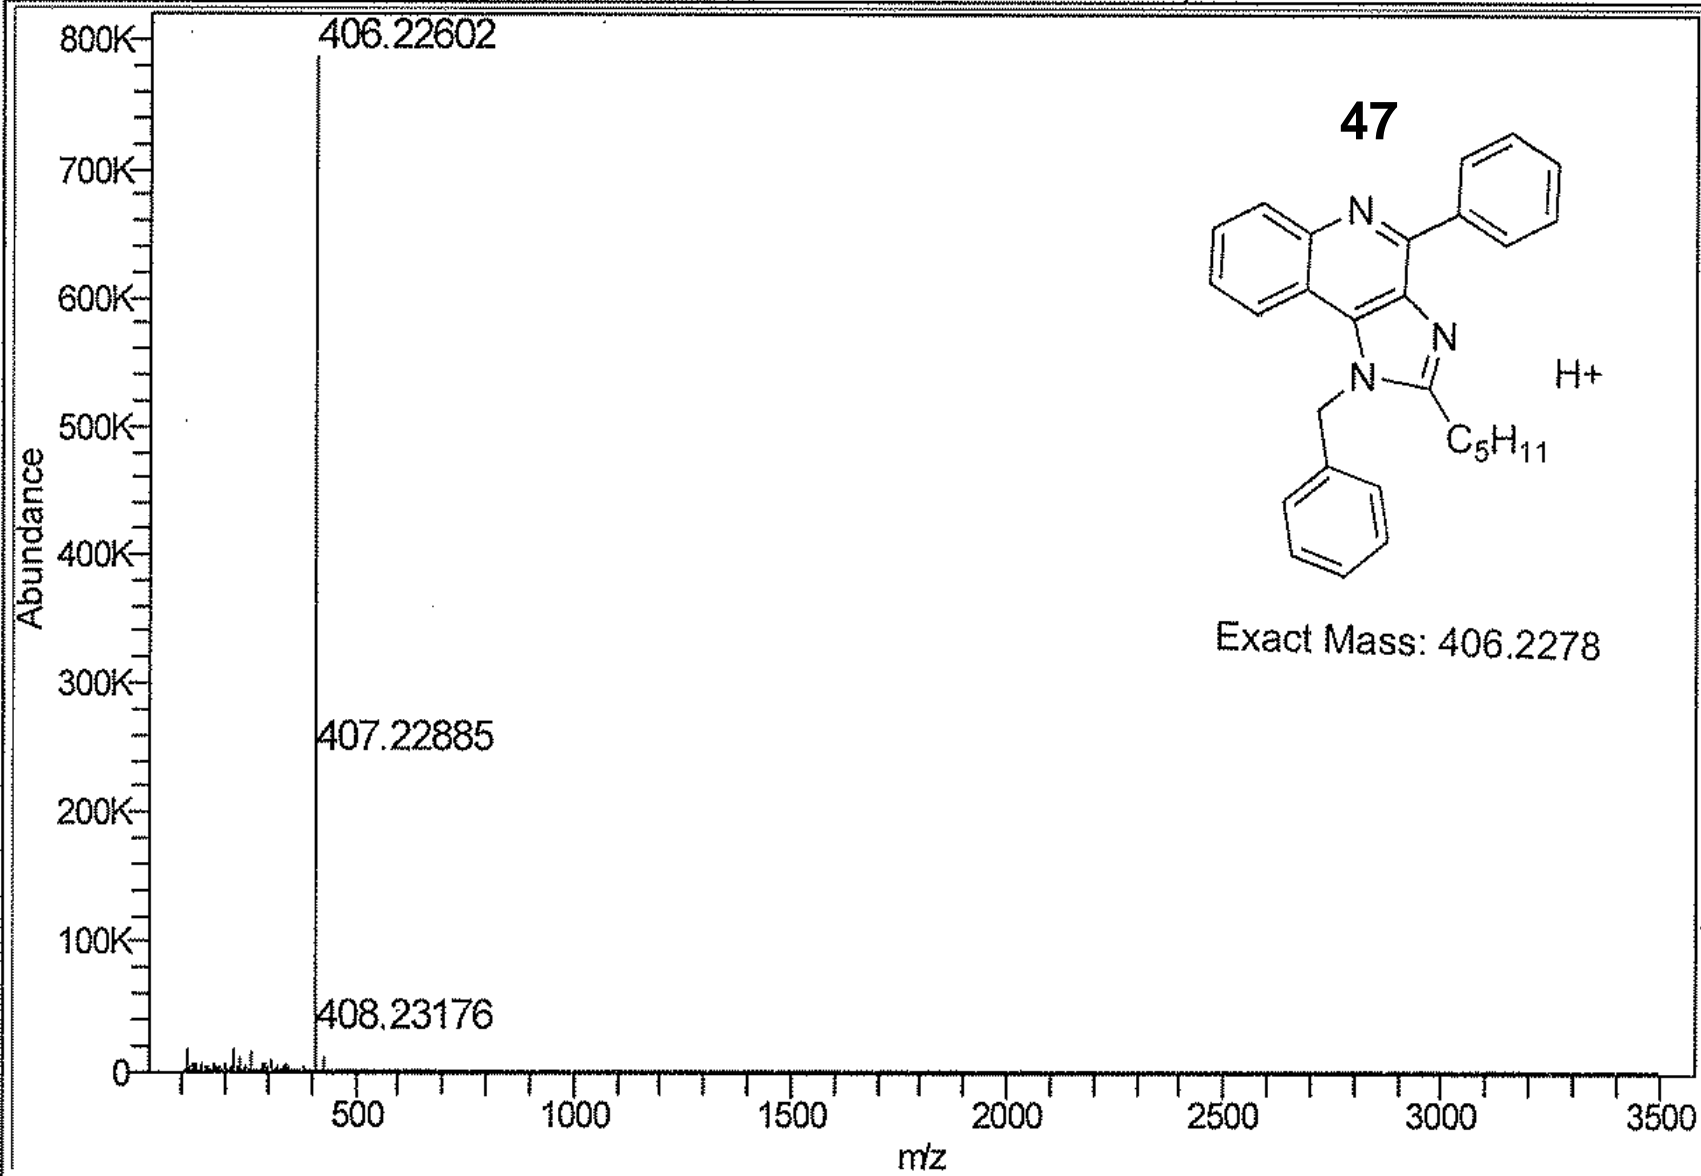

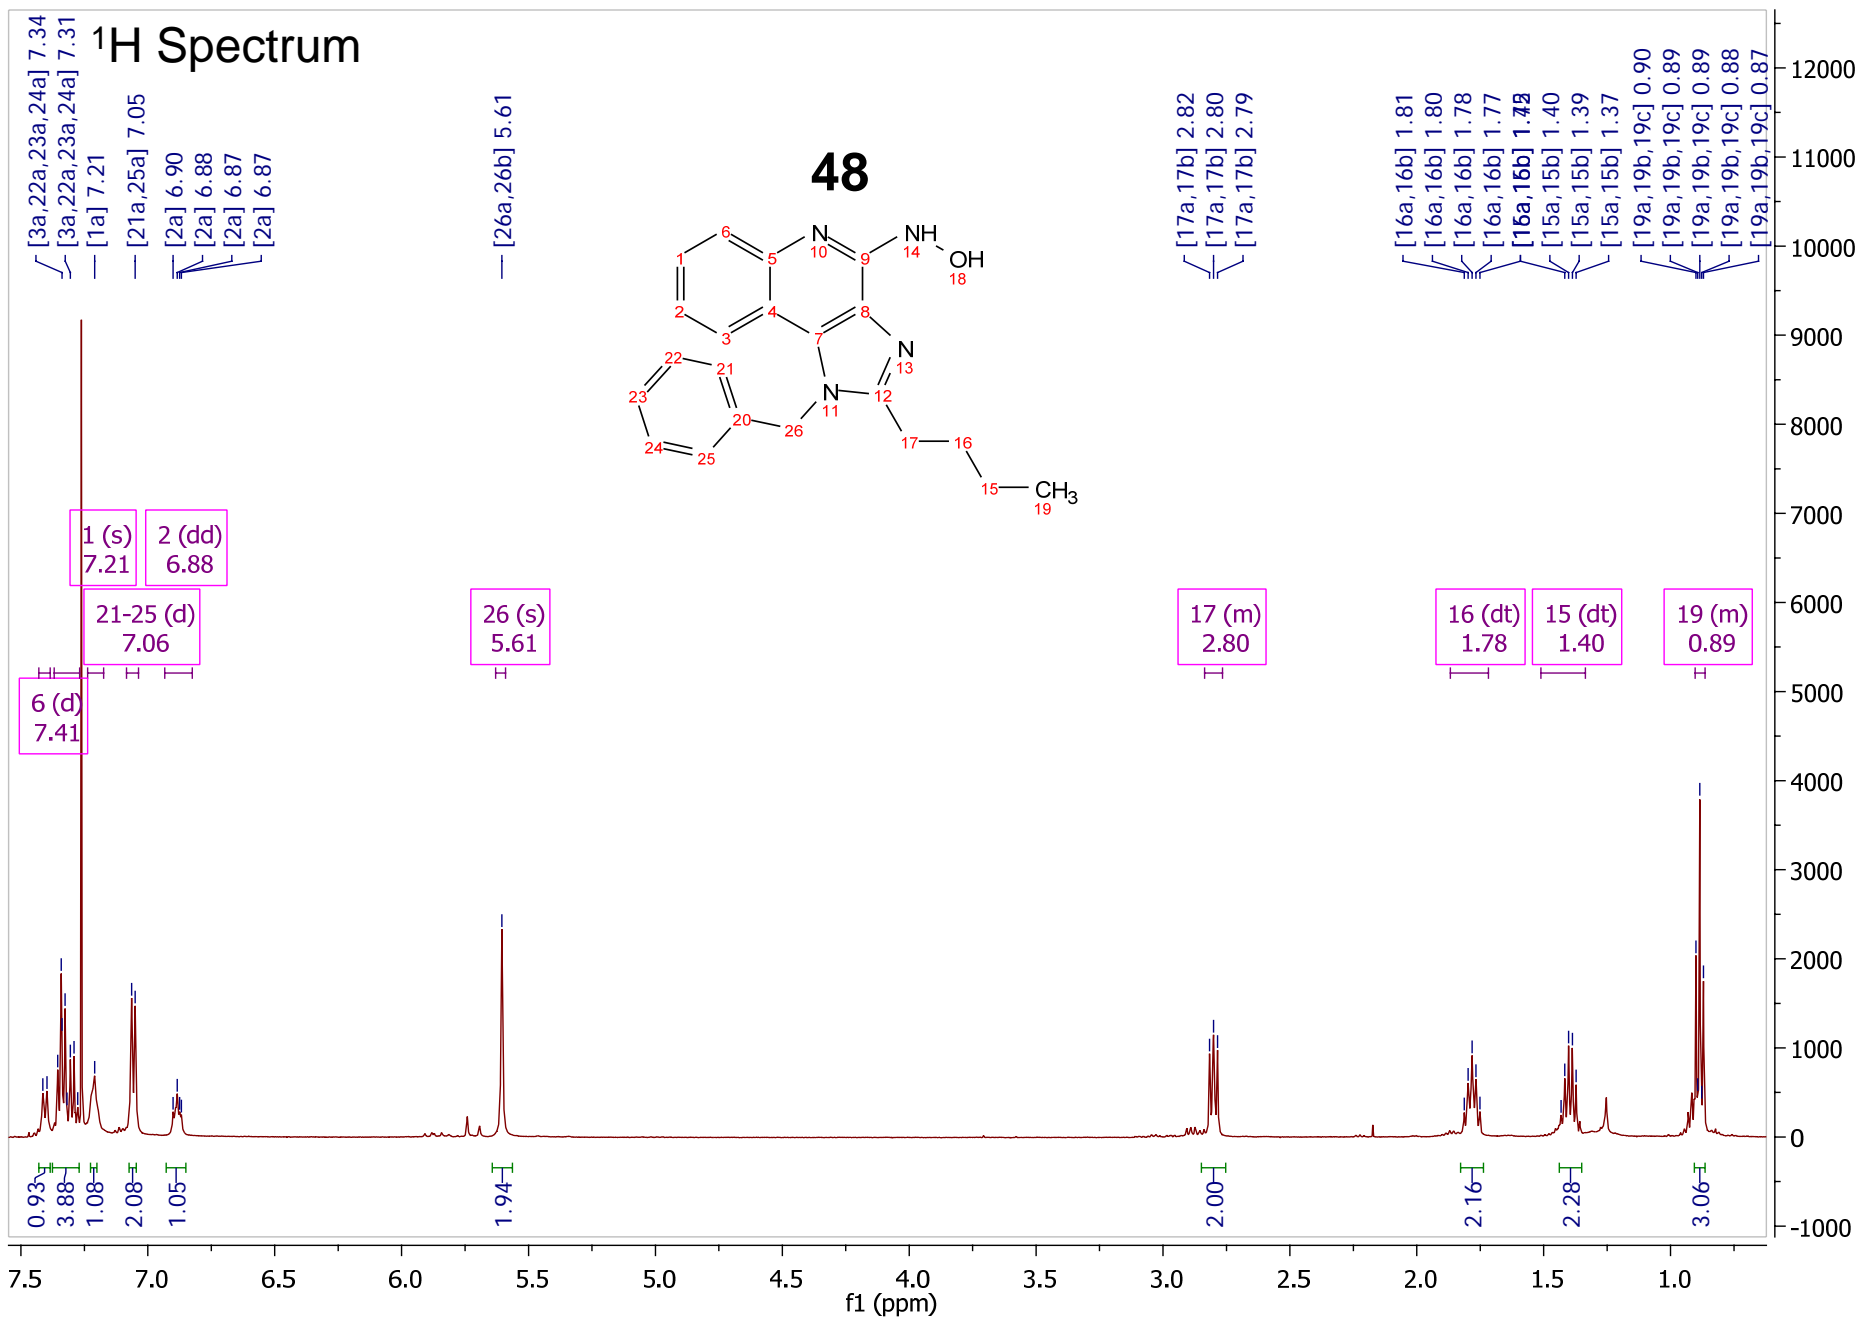

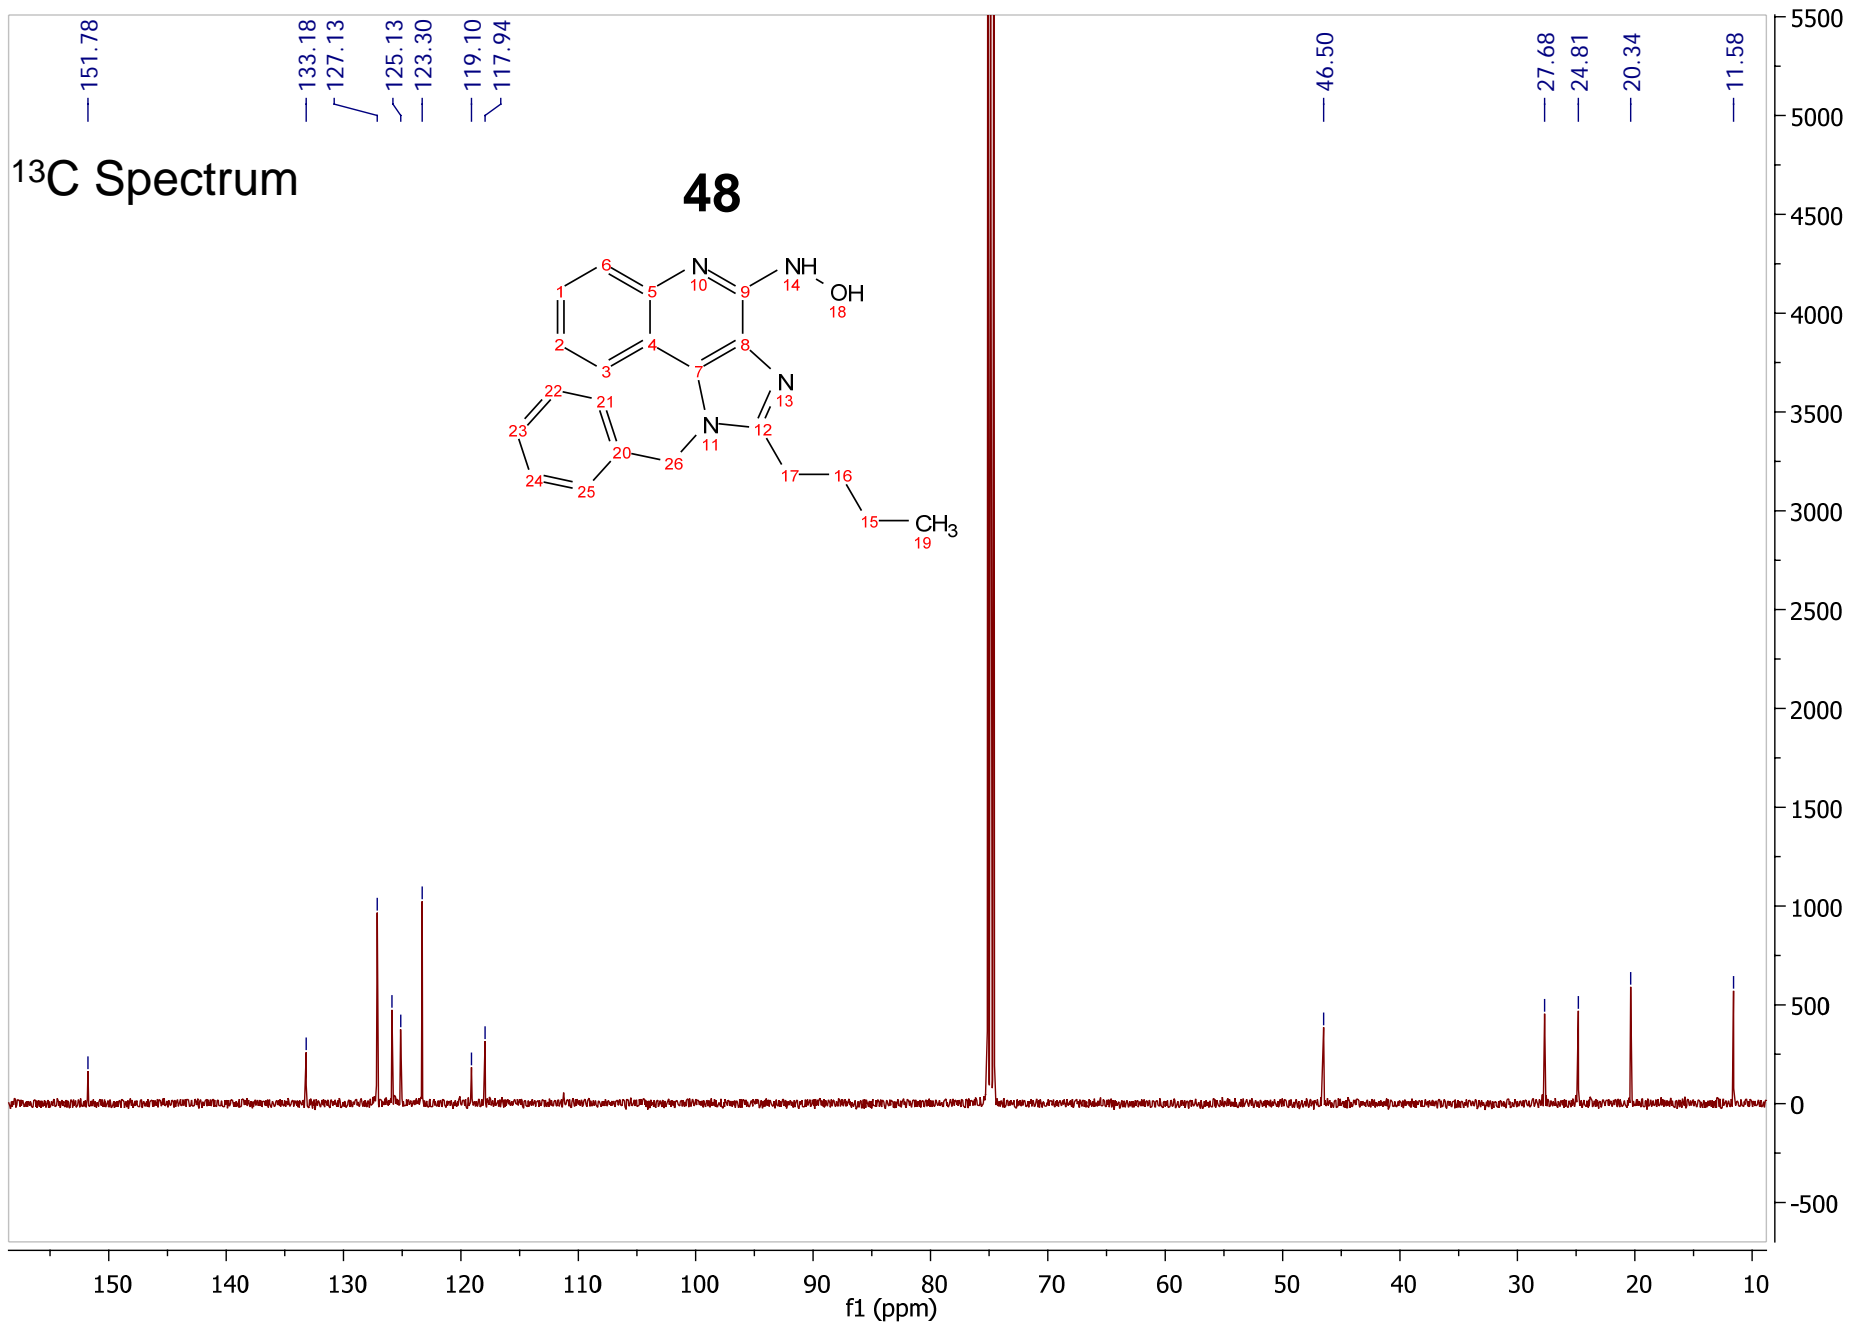

|              |                   |                                          |
|--------------|-------------------|------------------------------------------|
| TOF Spectrum | TOF               | Profile Spectrum at 2352.98 min (scan 1) |
| Baseline = 0 | Abundance Min = 0 | Abundance Max = 105988                   |

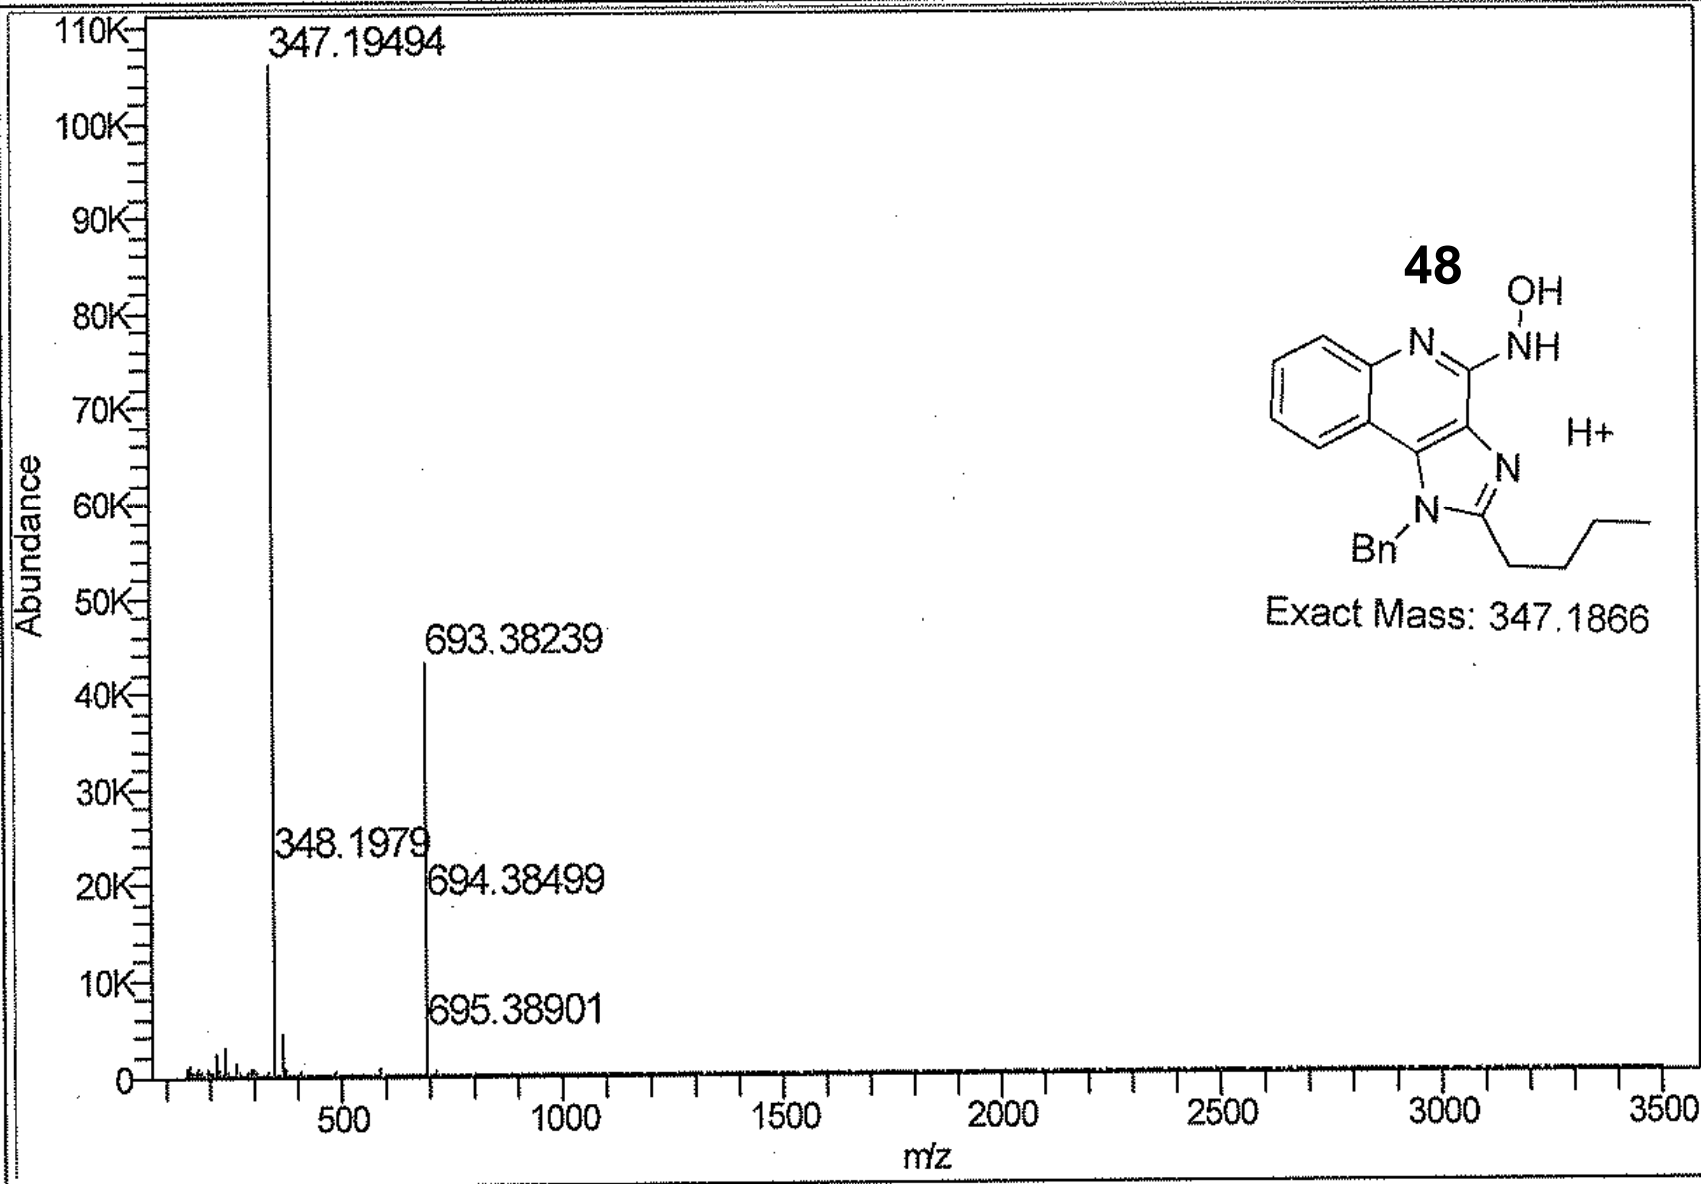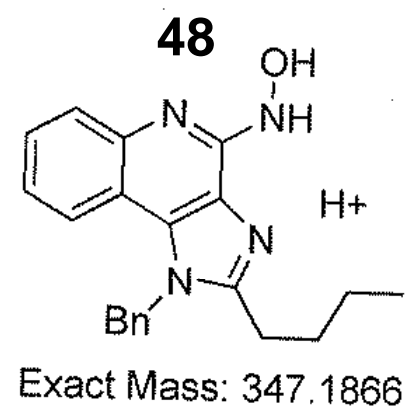



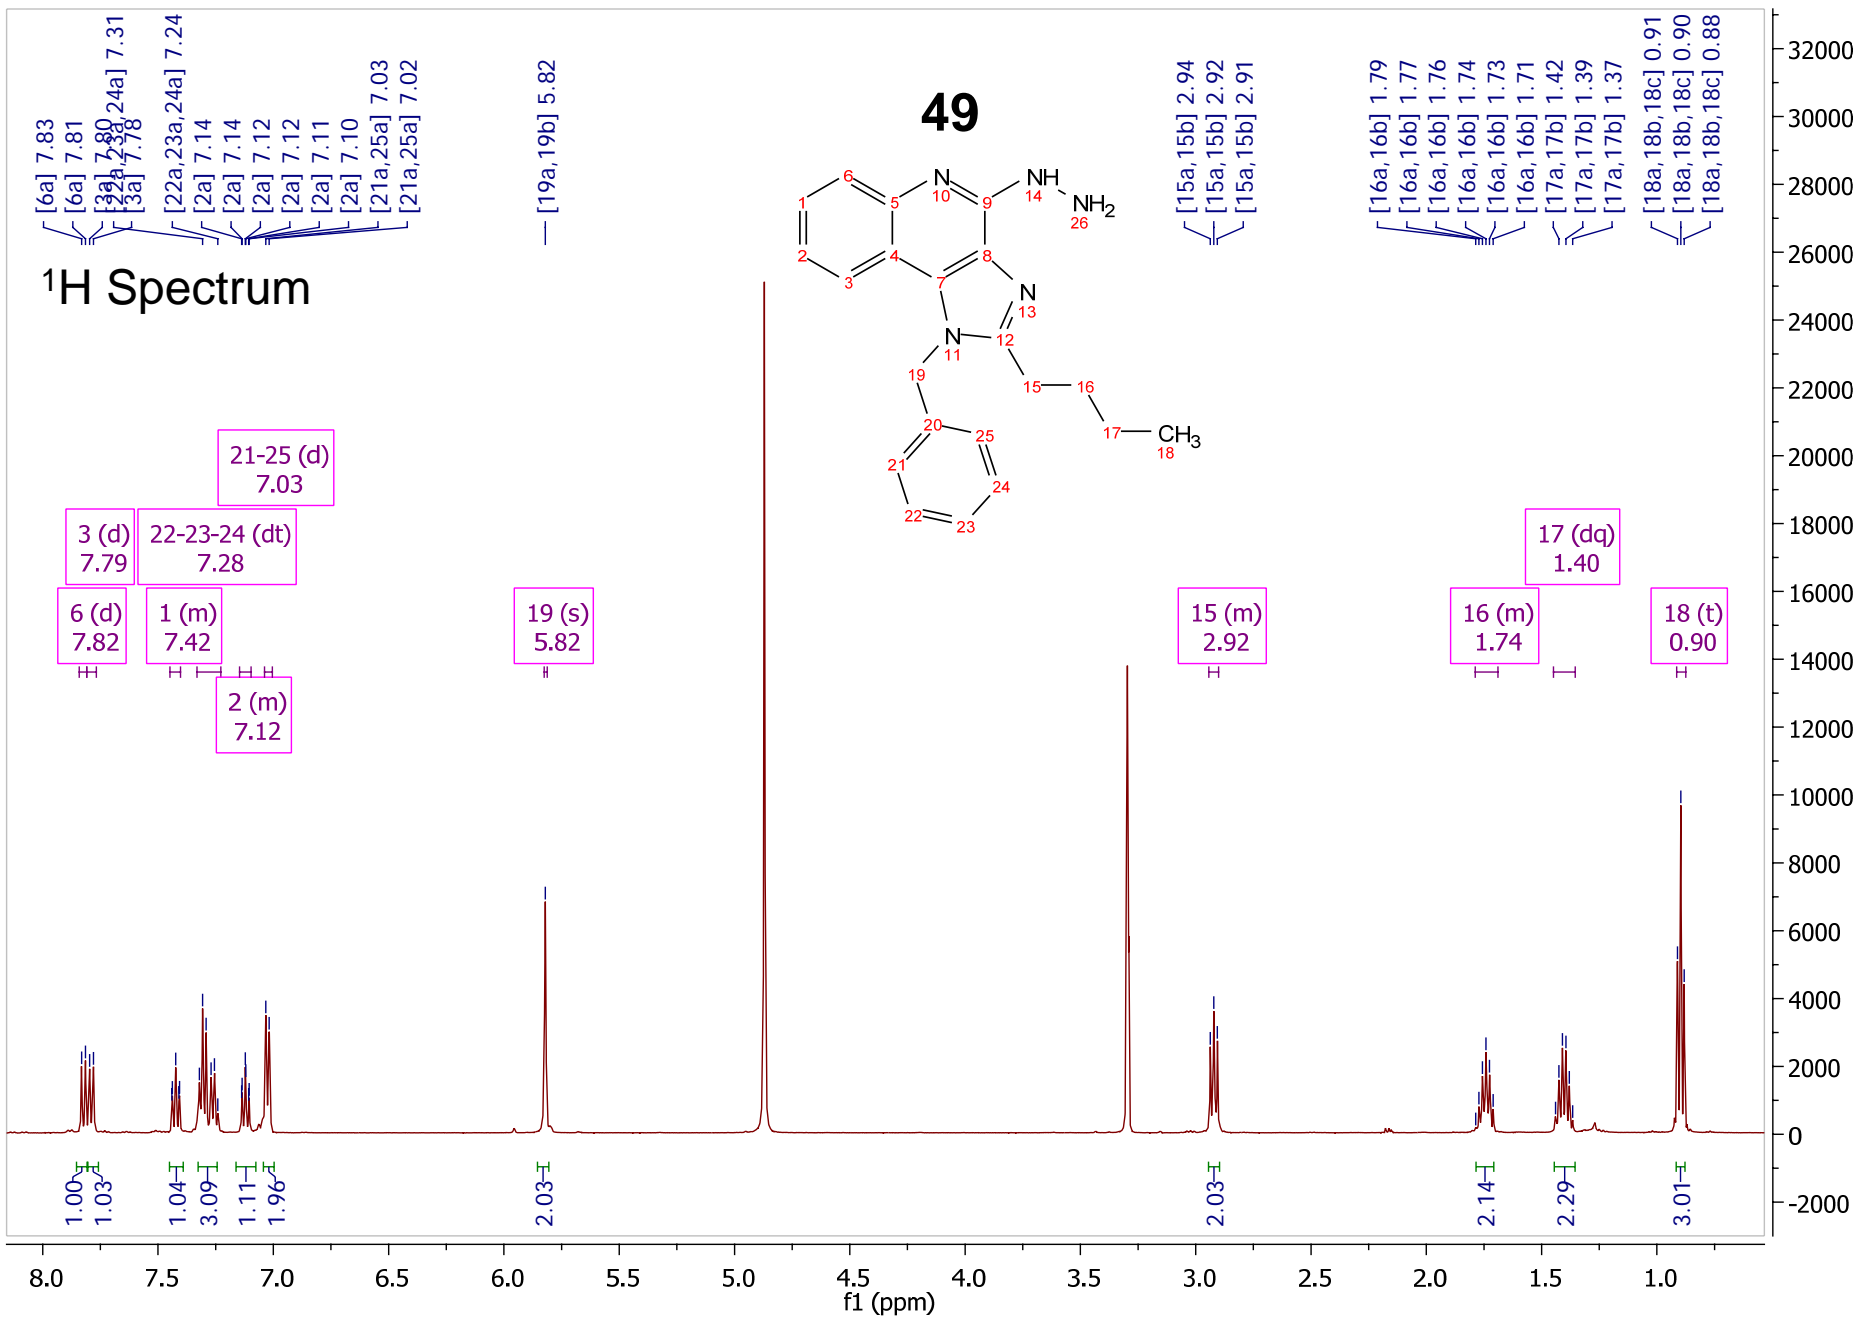

# <sup>13</sup>C Spectrum

49

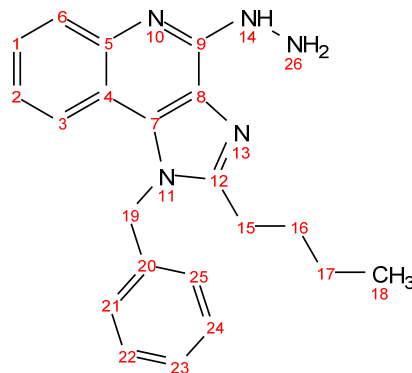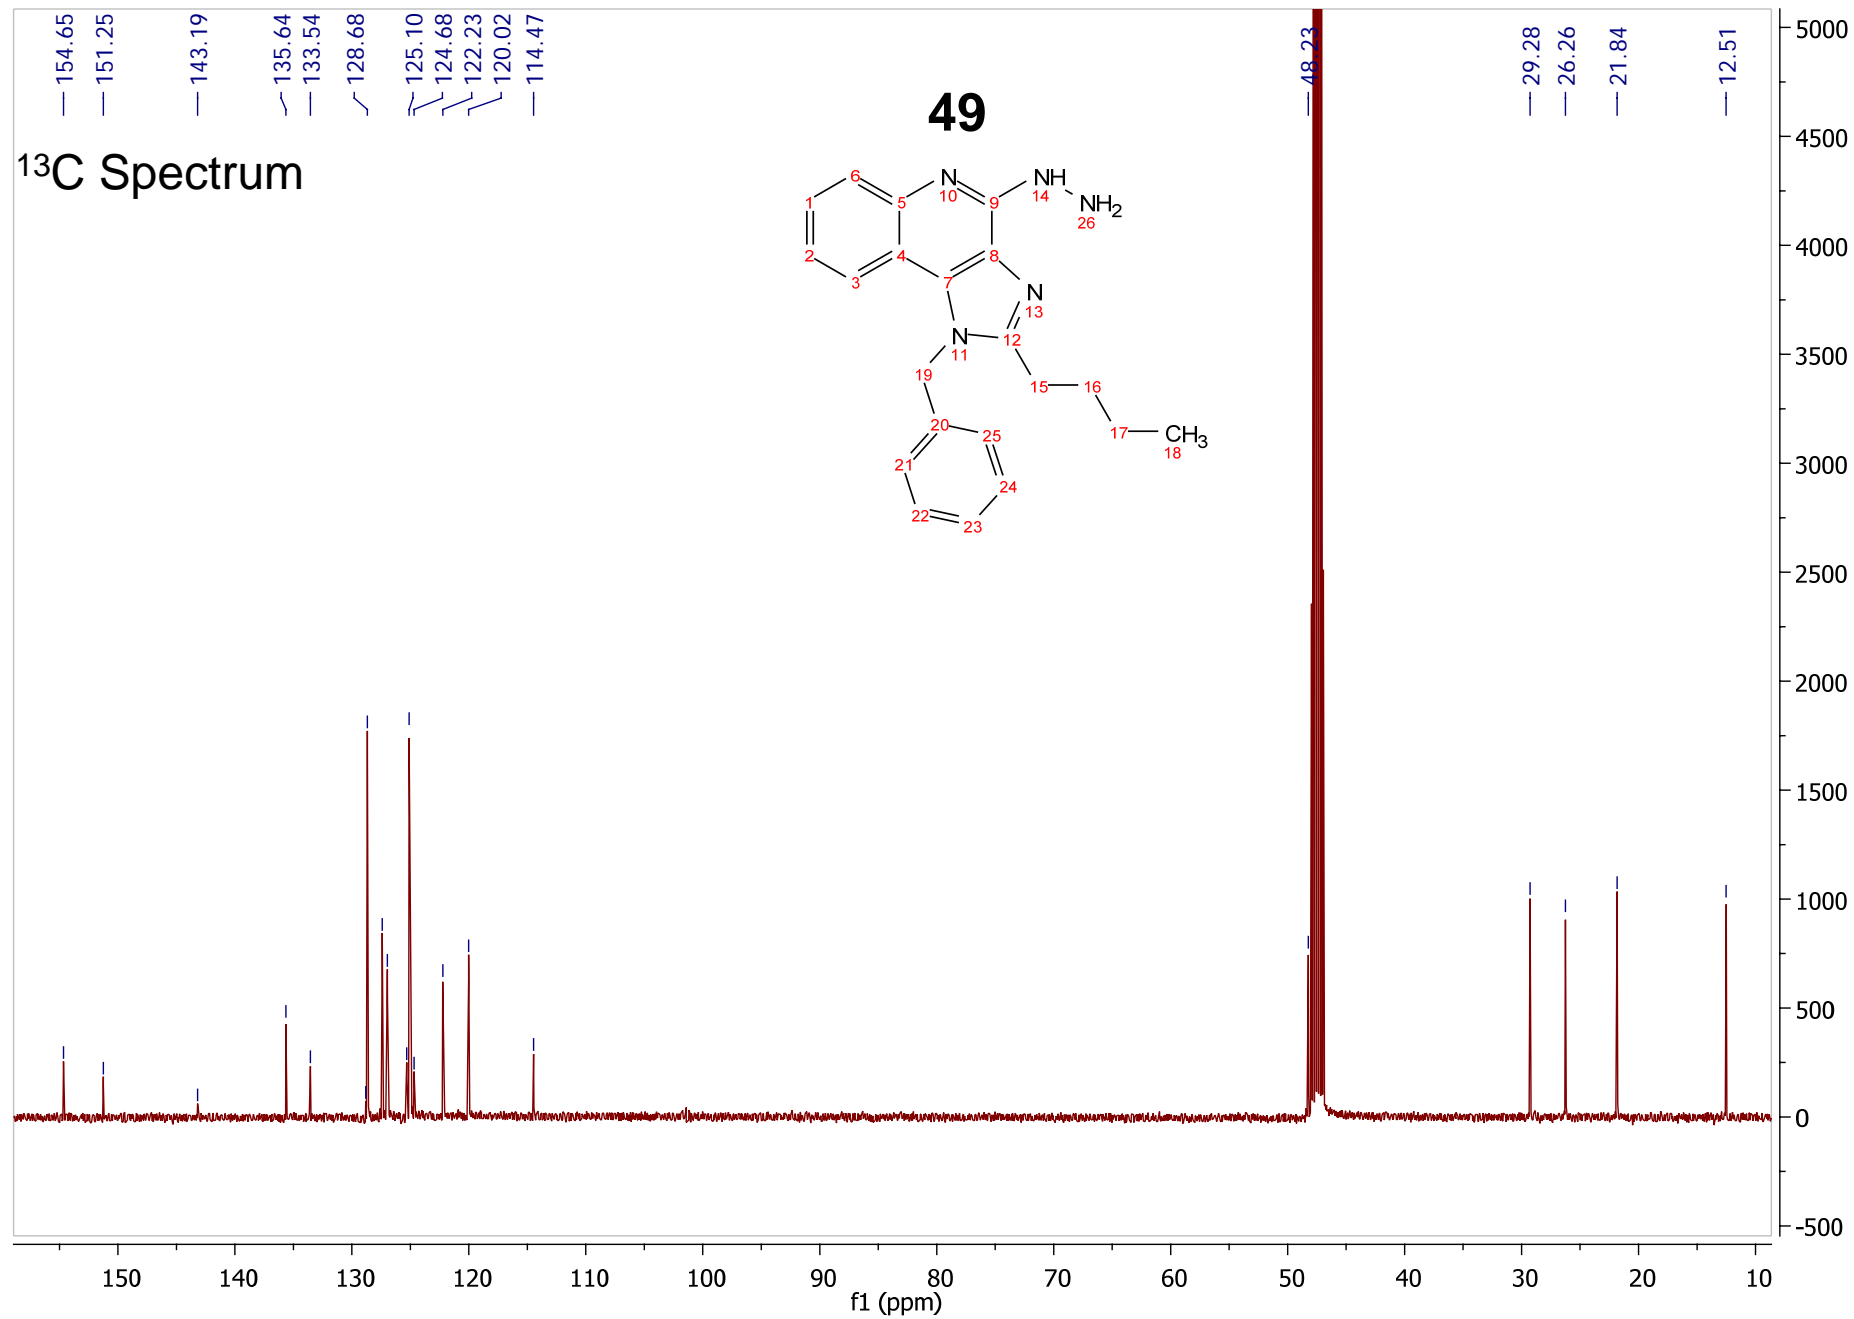

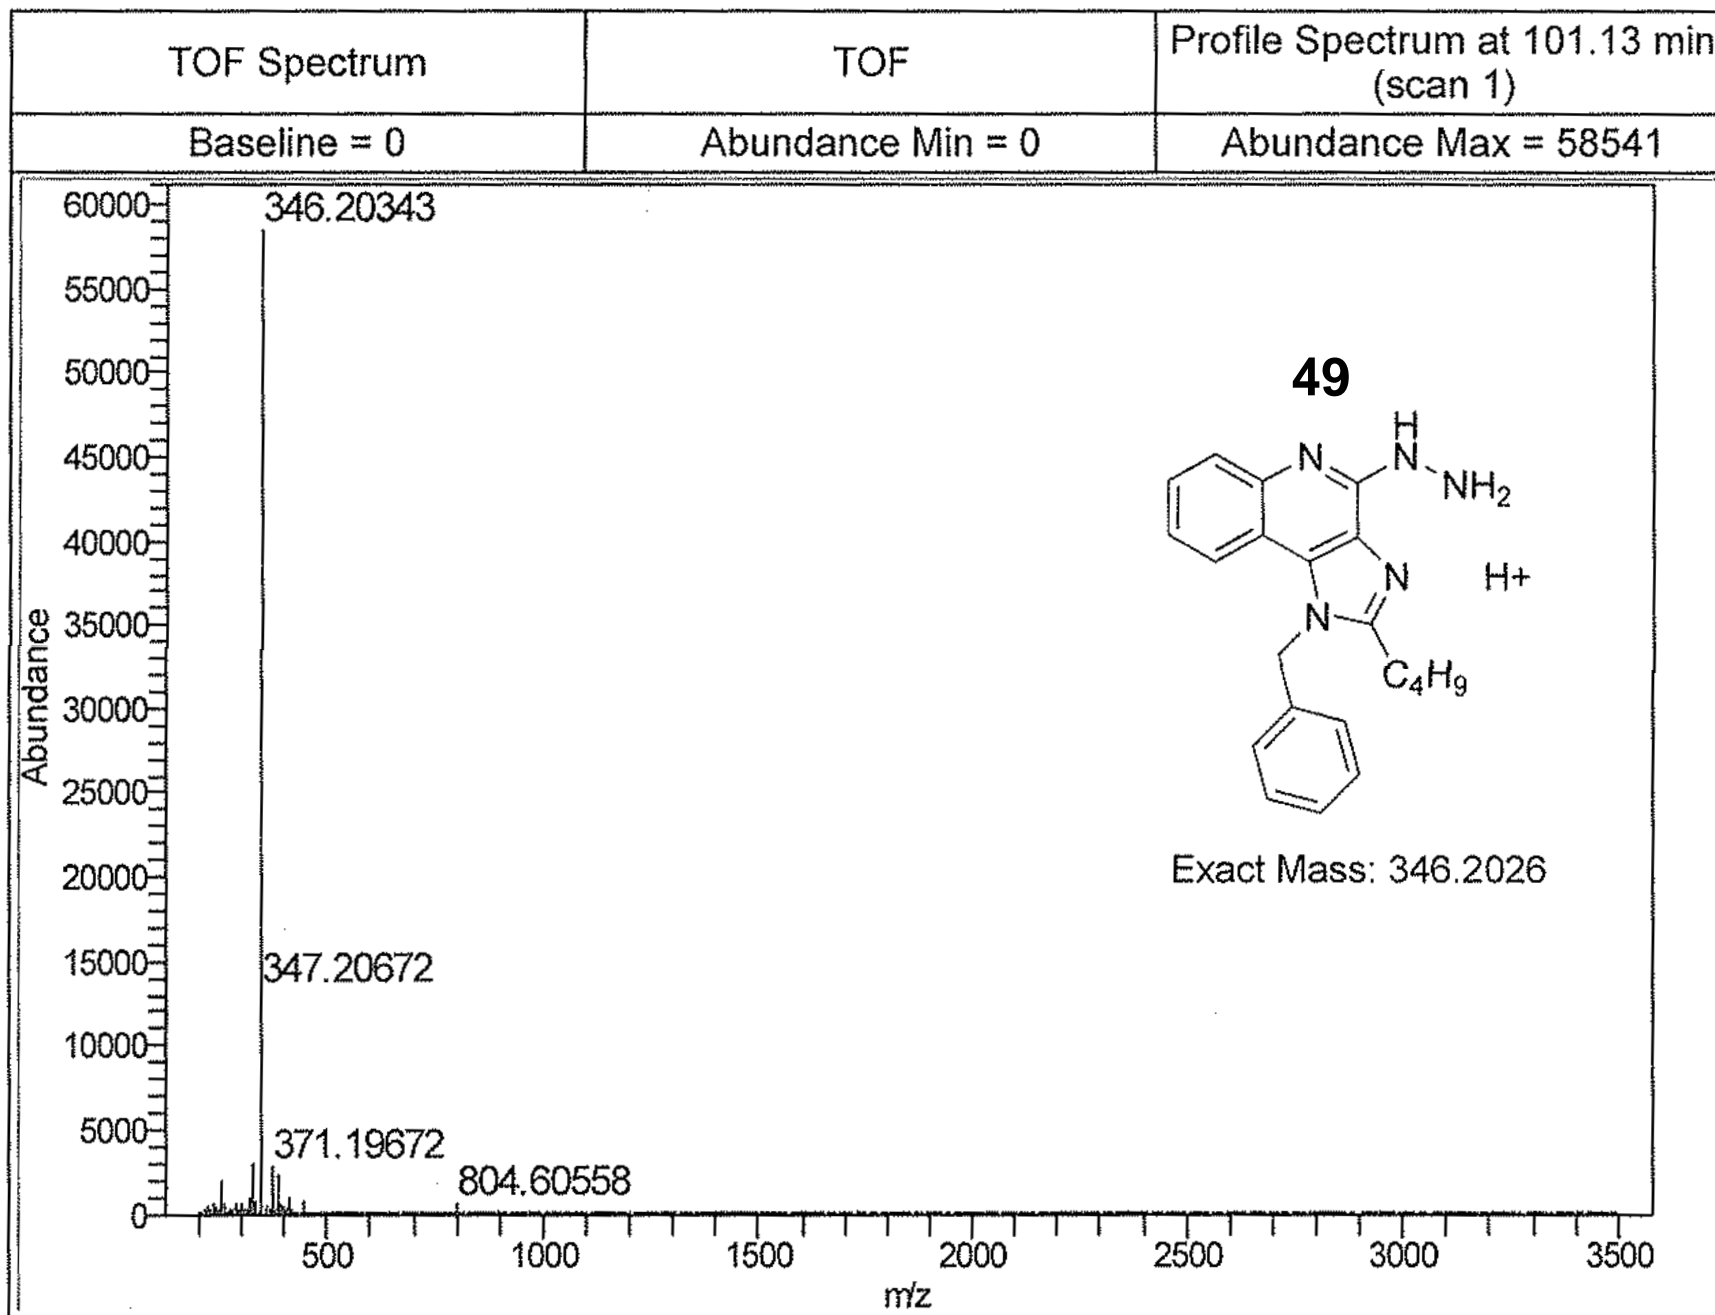

# <sup>1</sup>H Spectrum

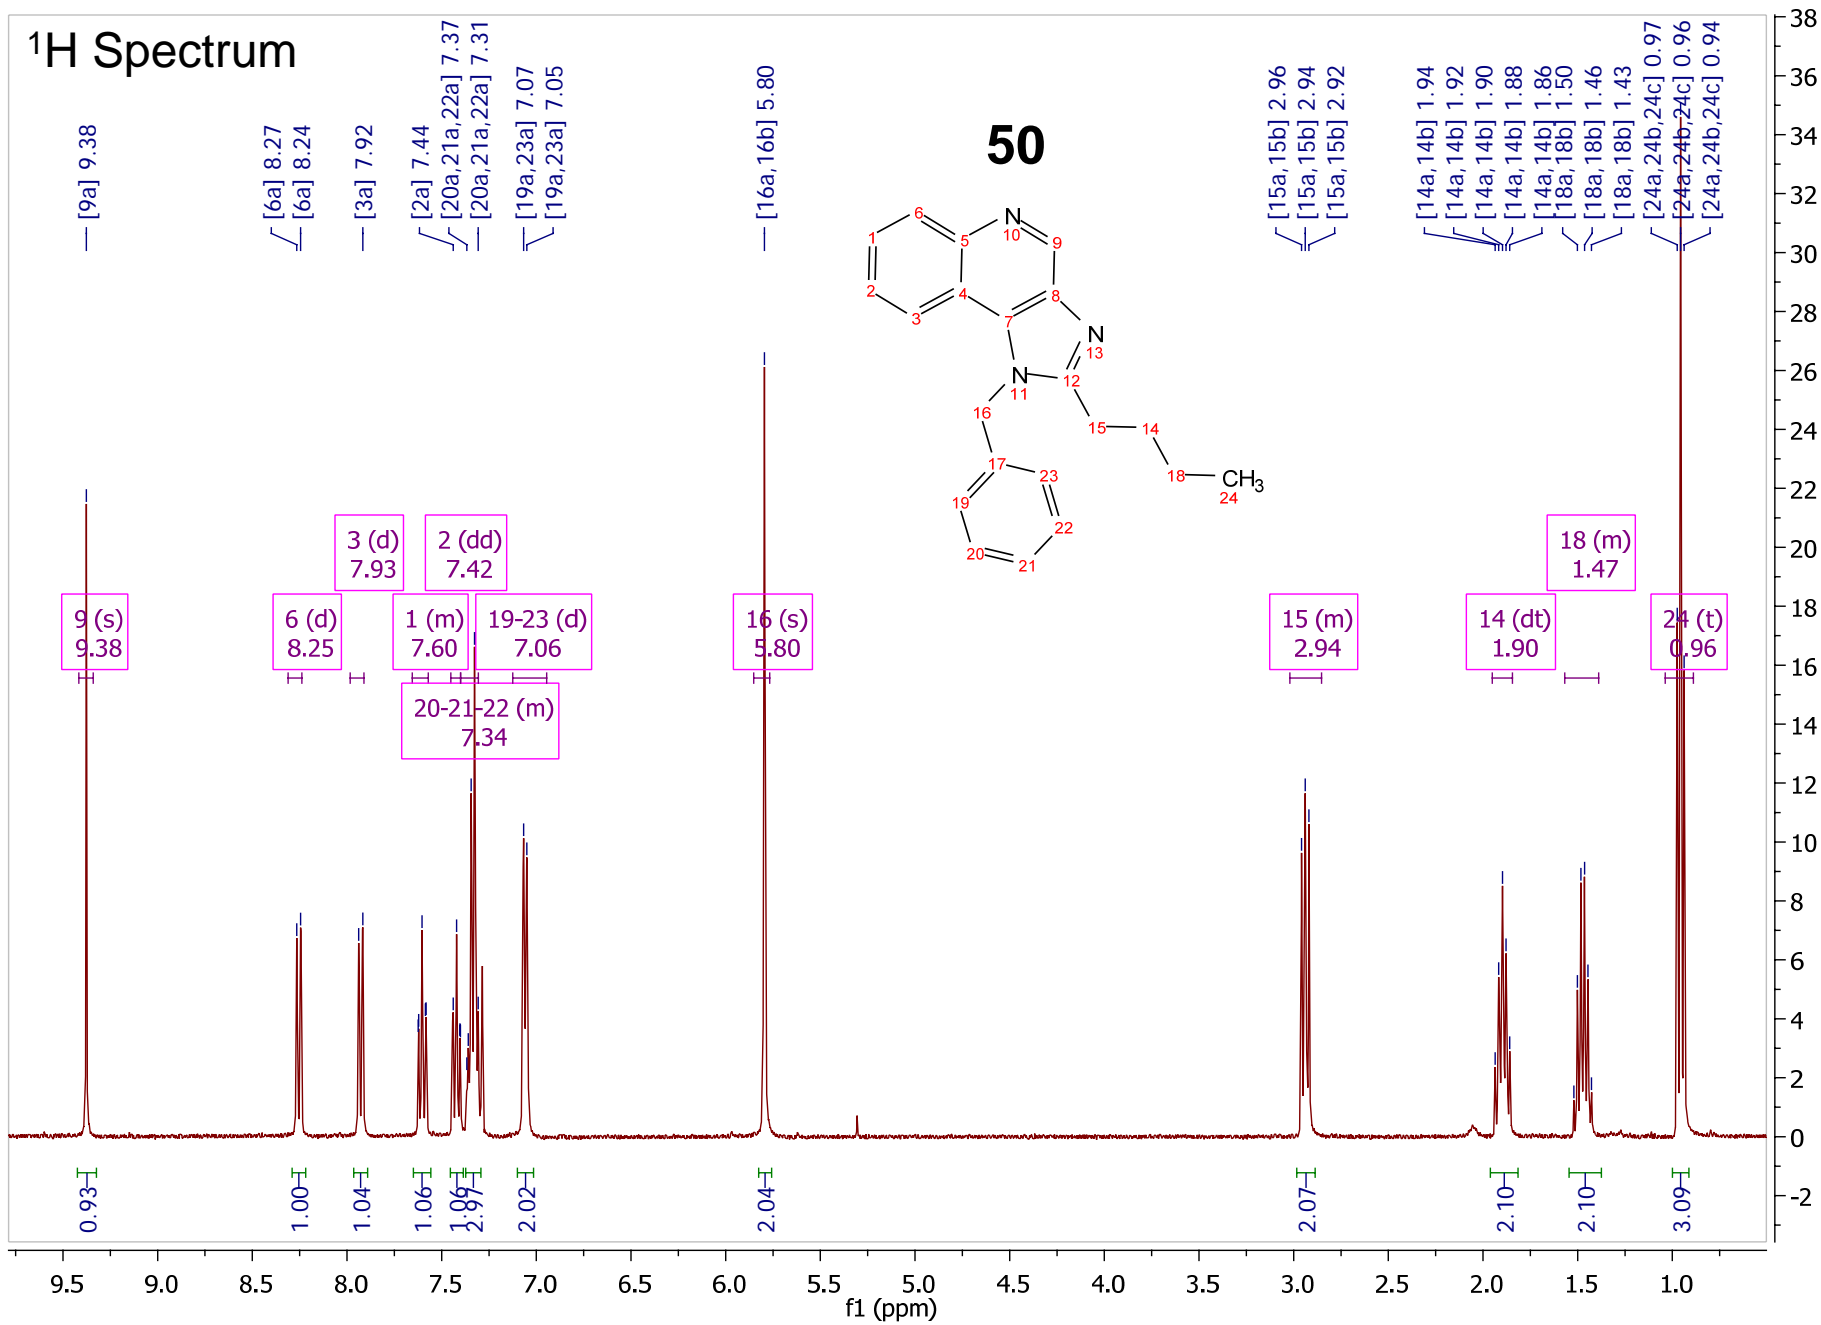

# <sup>13</sup>C Spectrum

50

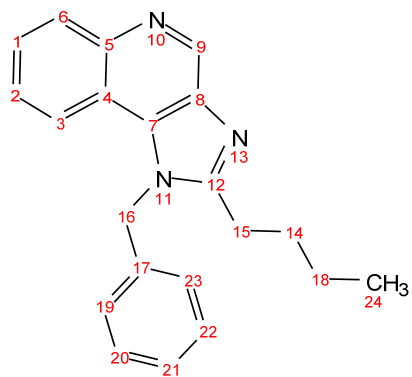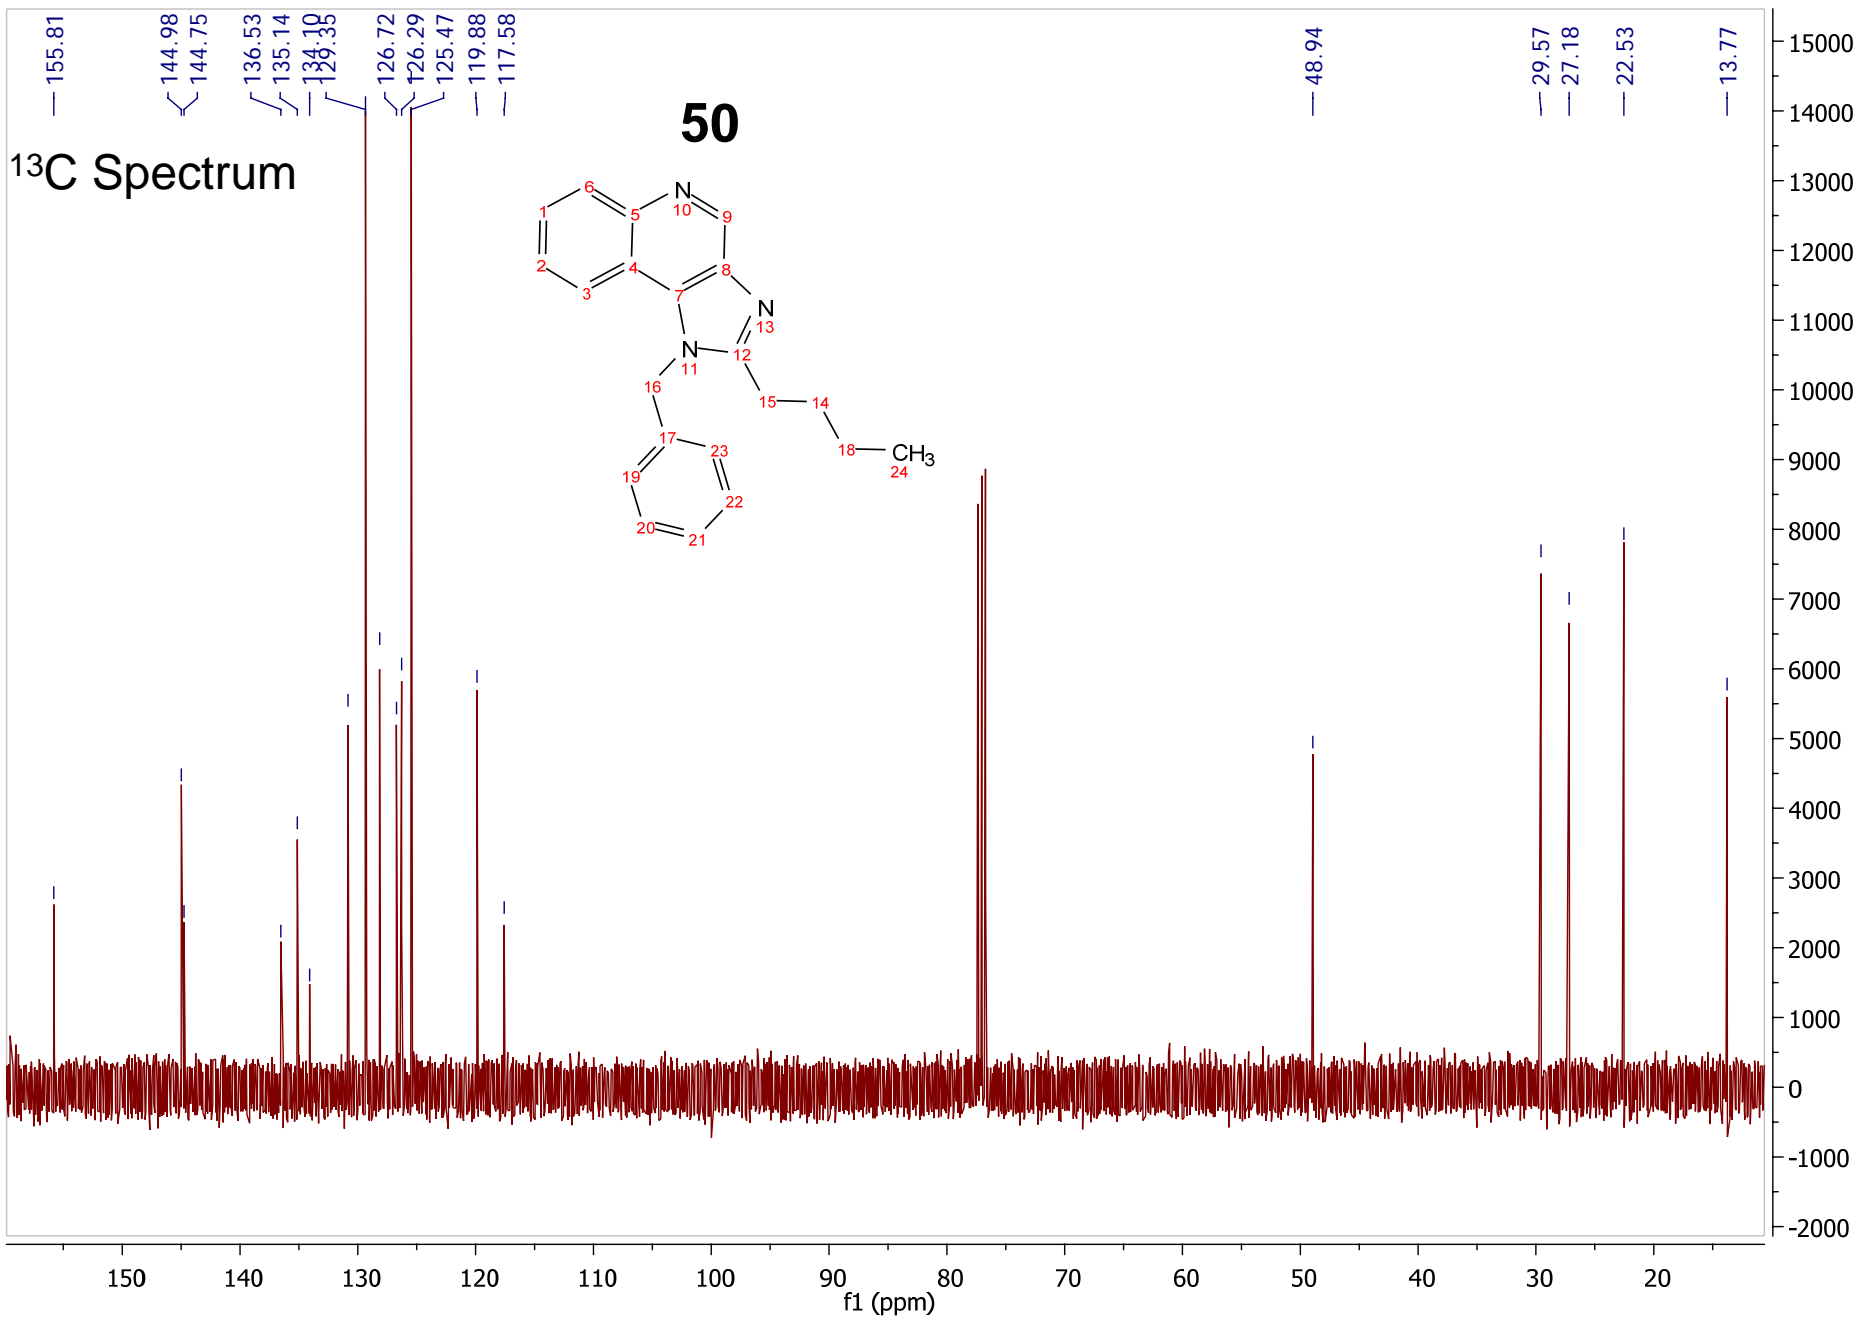

| TOF Spectrum | TOF               | Profile Spectrum at 57.33 min<br>(scan 1) |
|--------------|-------------------|-------------------------------------------|
| Baseline = 0 | Abundance Min = 0 | Abundance Max = 1157019                   |

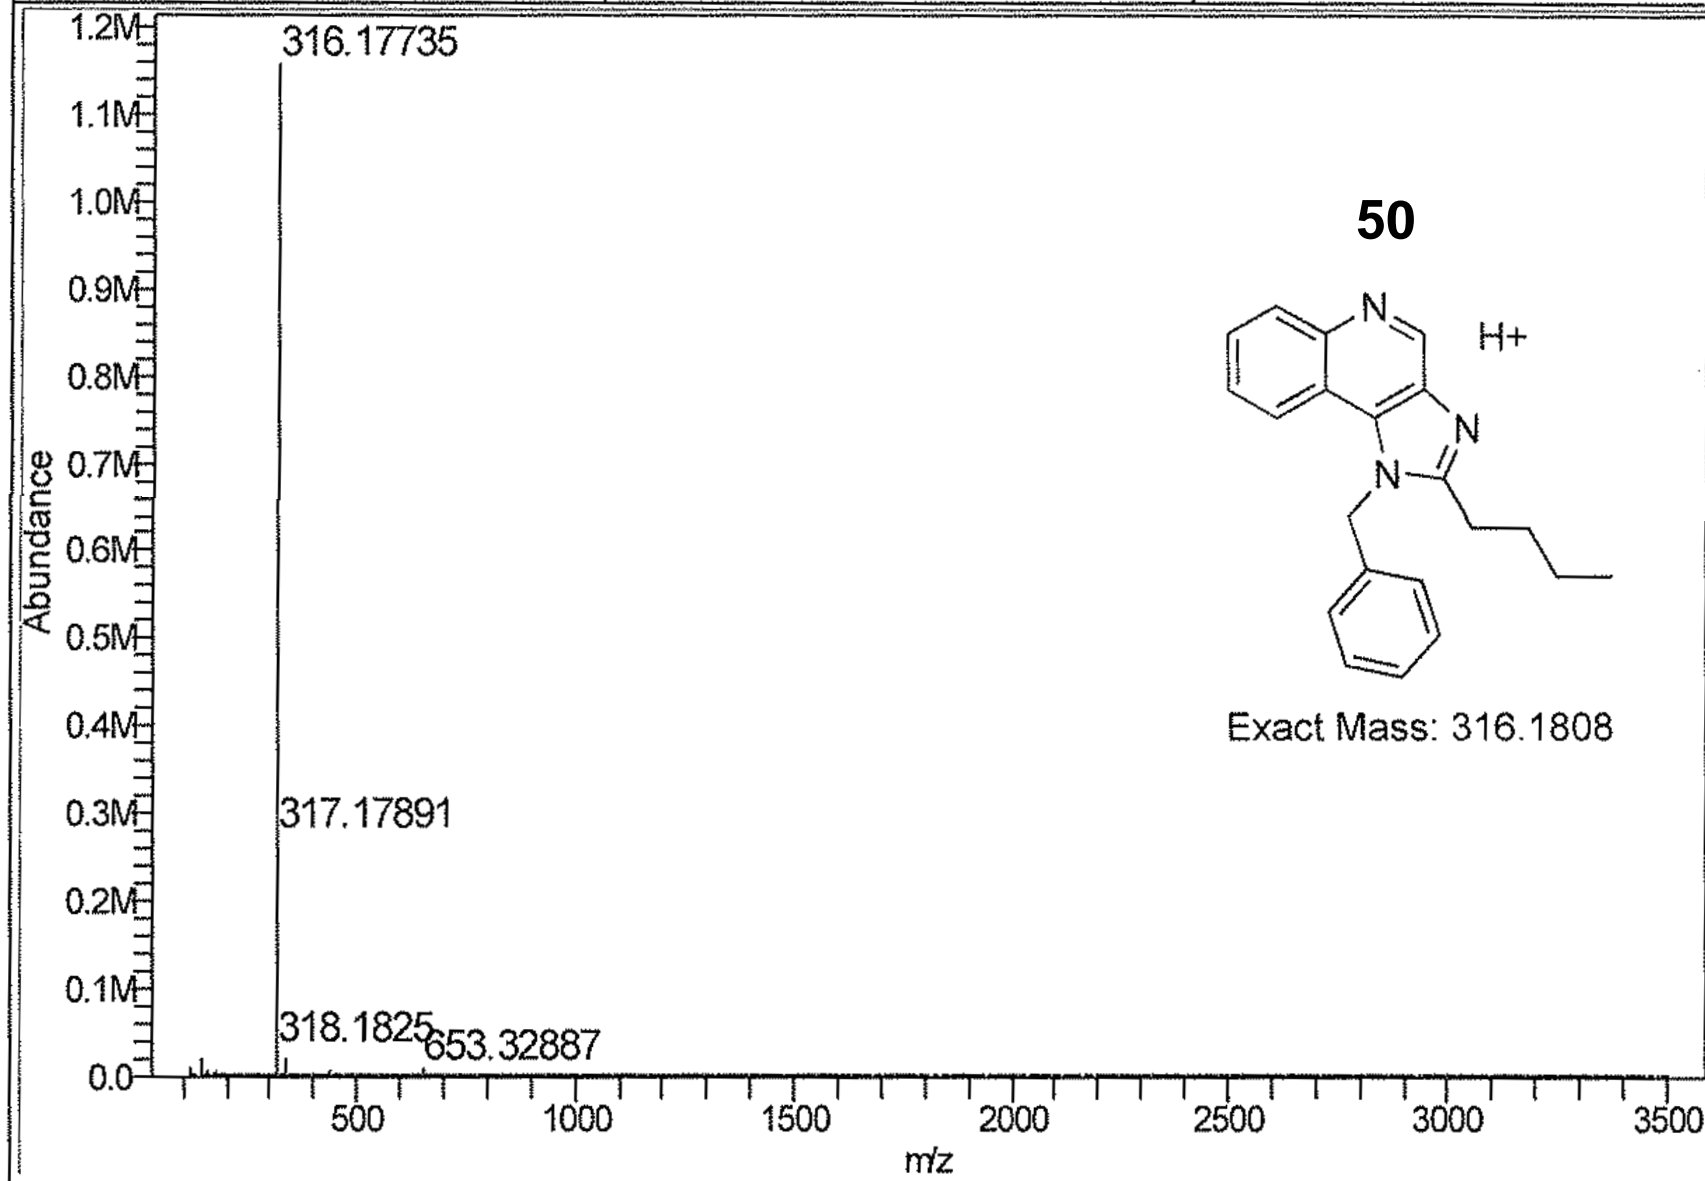

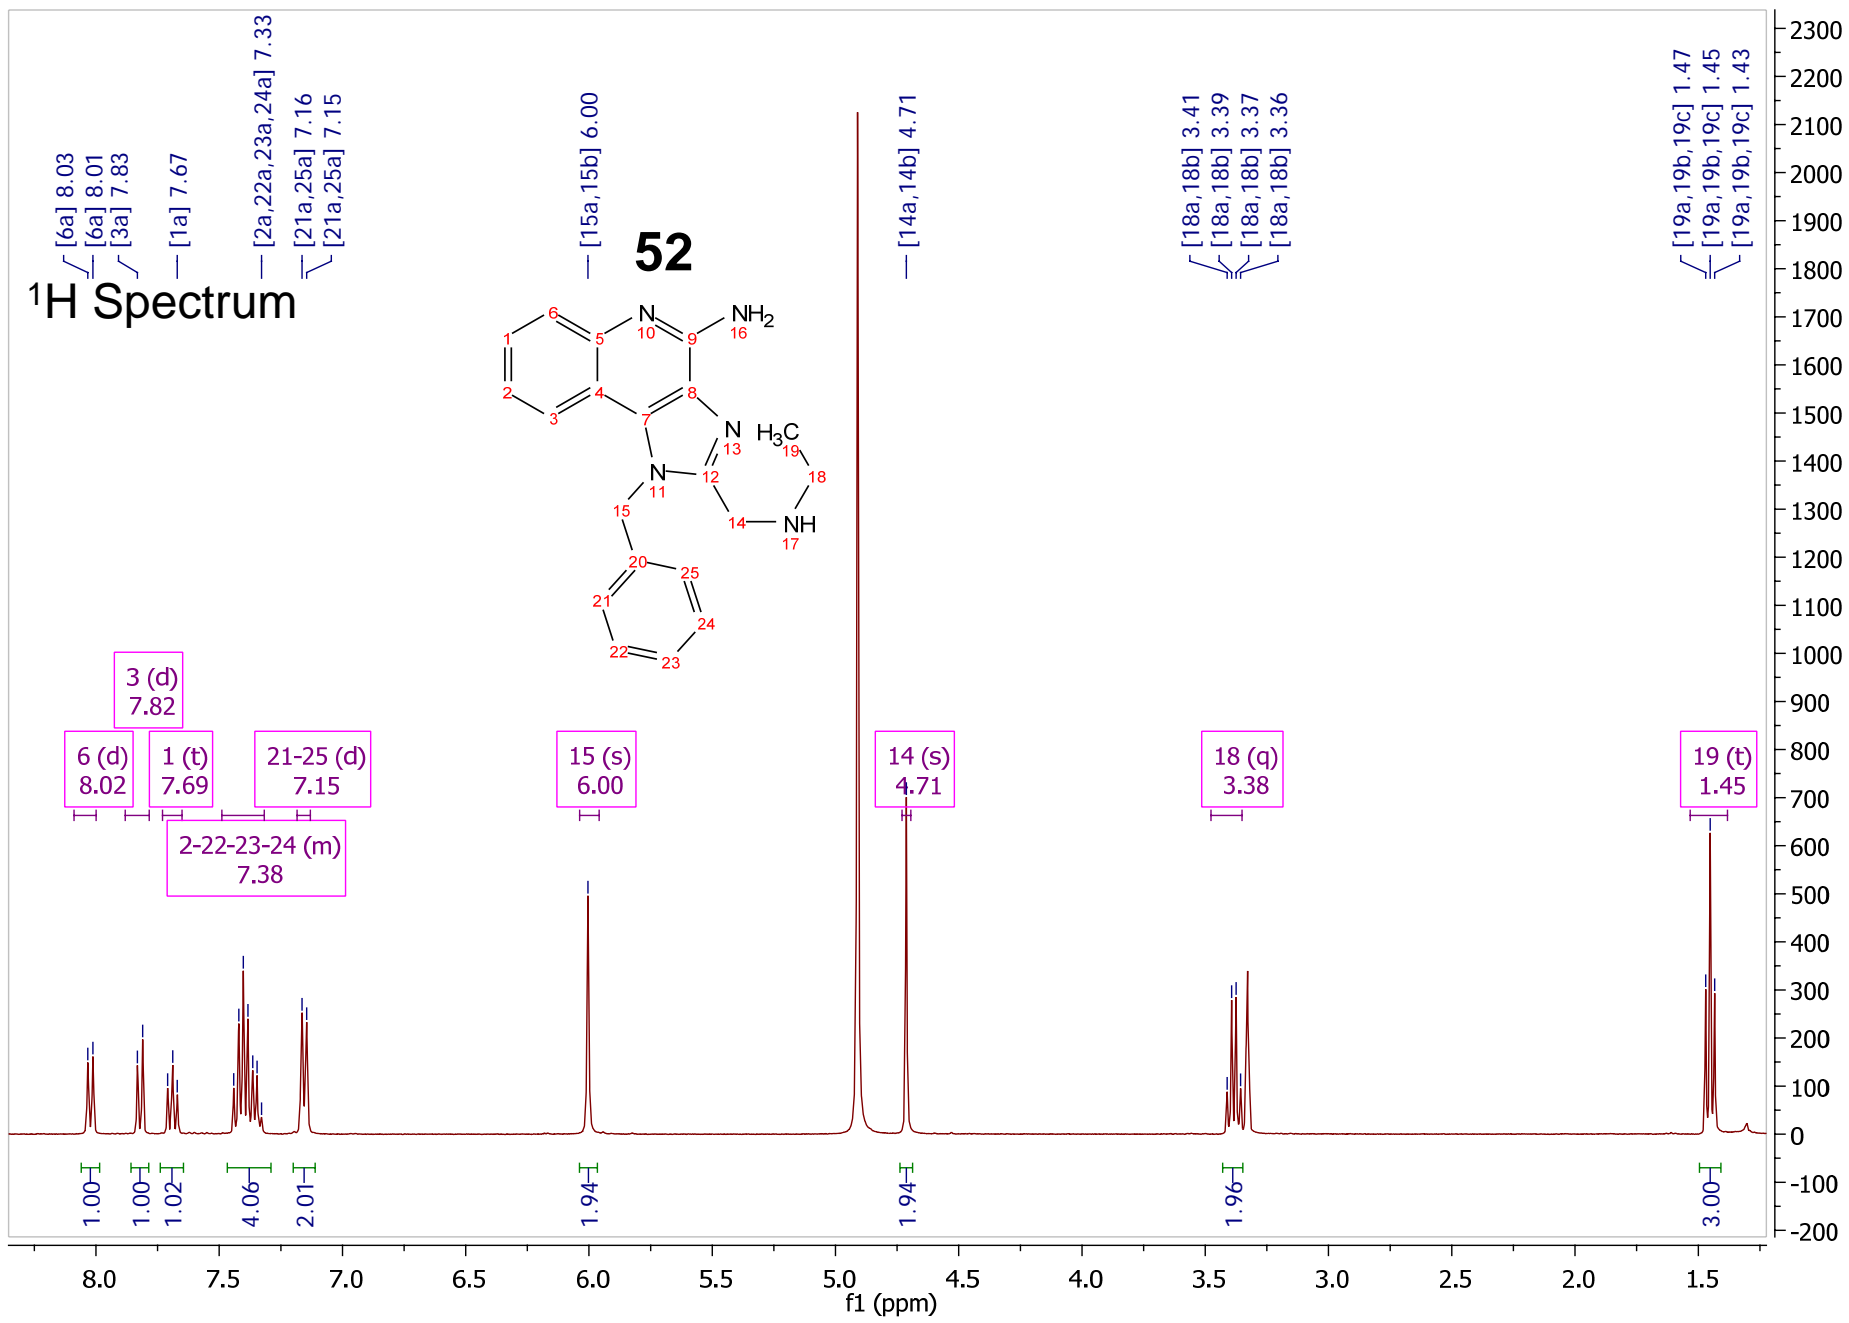

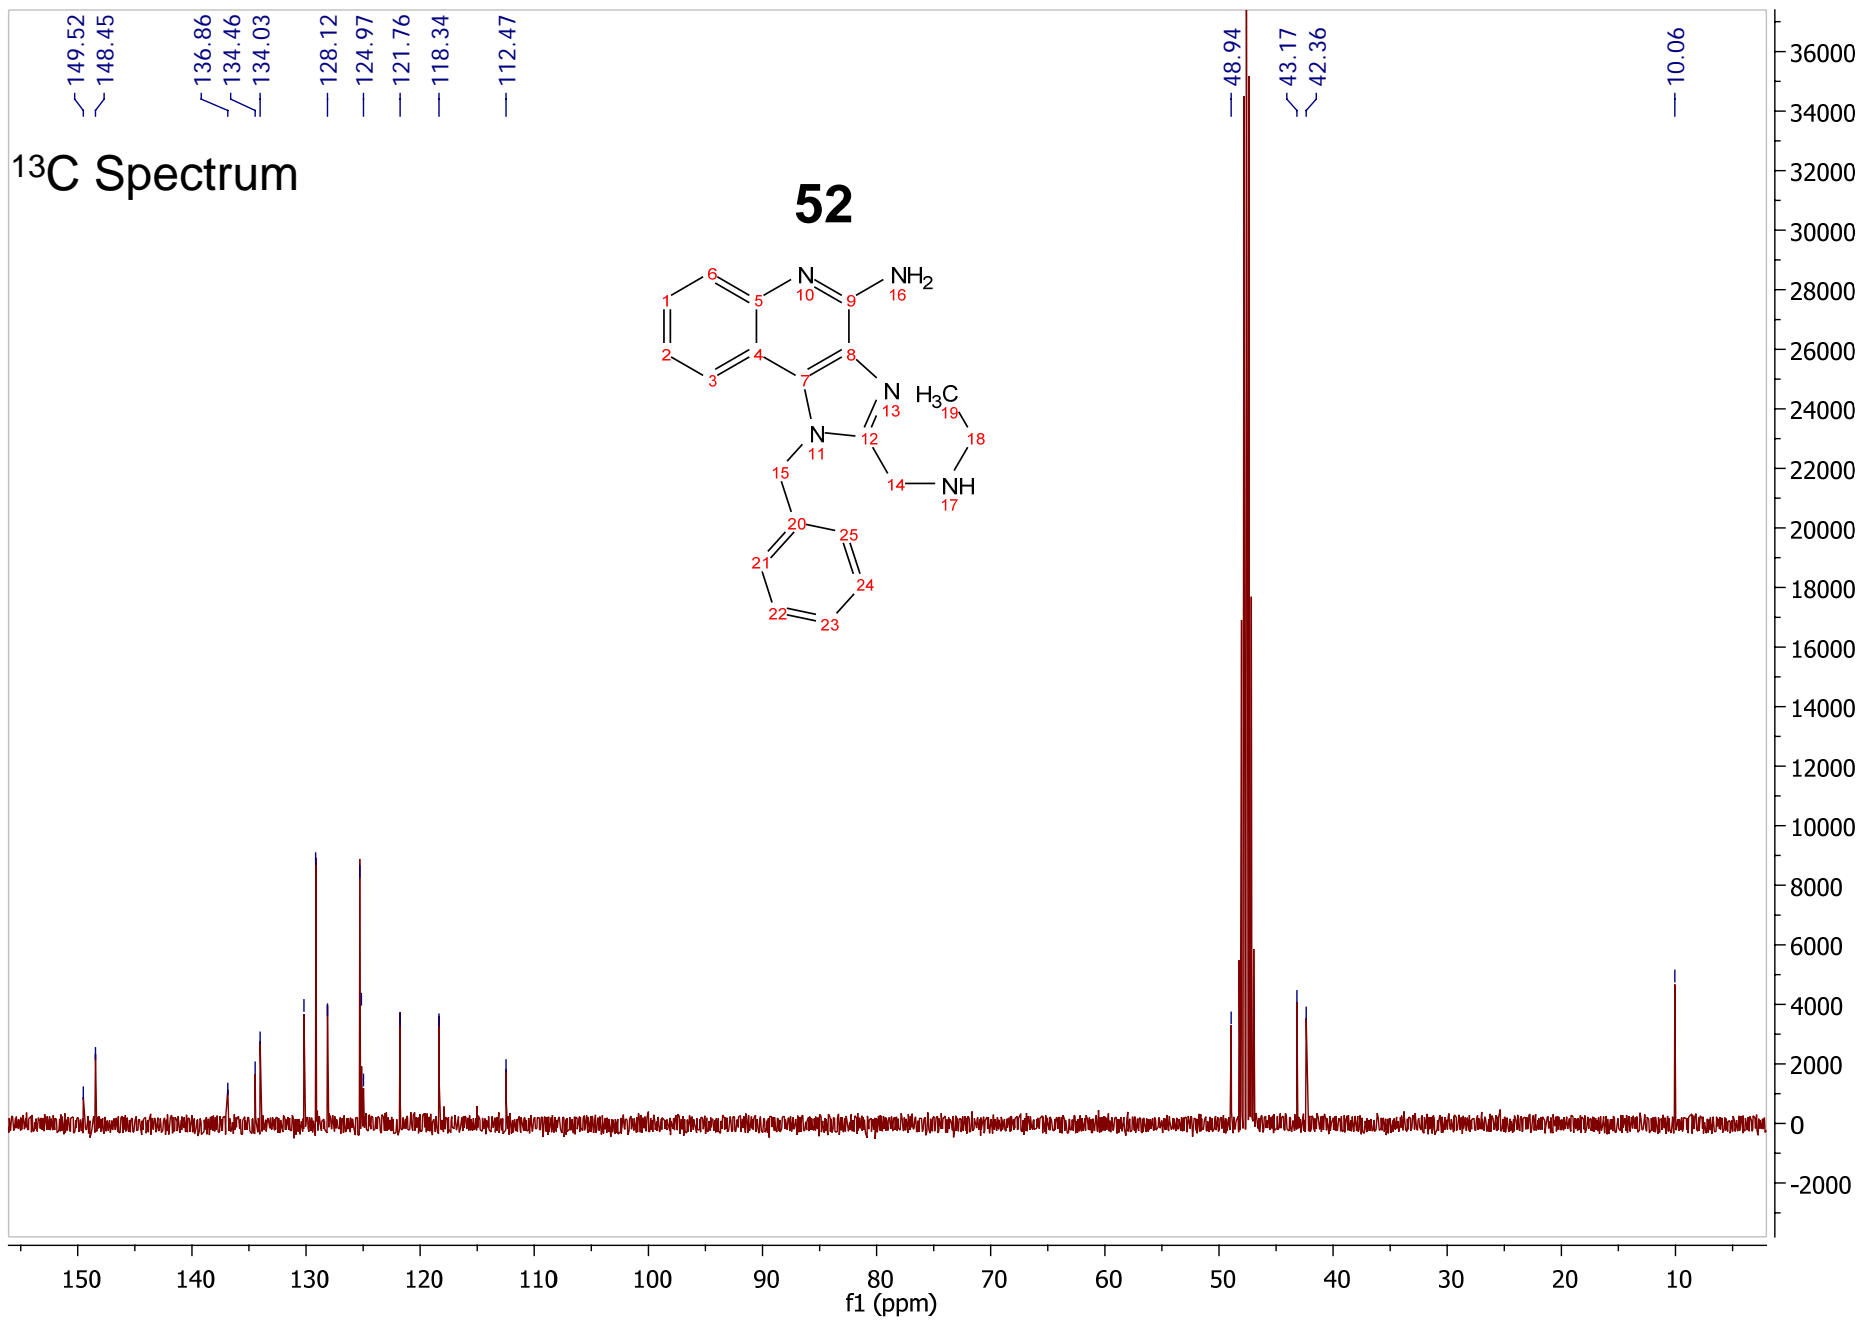



|              |                   |                                          |
|--------------|-------------------|------------------------------------------|
| TOF Spectrum | TOF               | Profile Spectrum at 1263.93 min (scan 1) |
| Baseline = 0 | Abundance Min = 0 | Abundance Max = 137658                   |

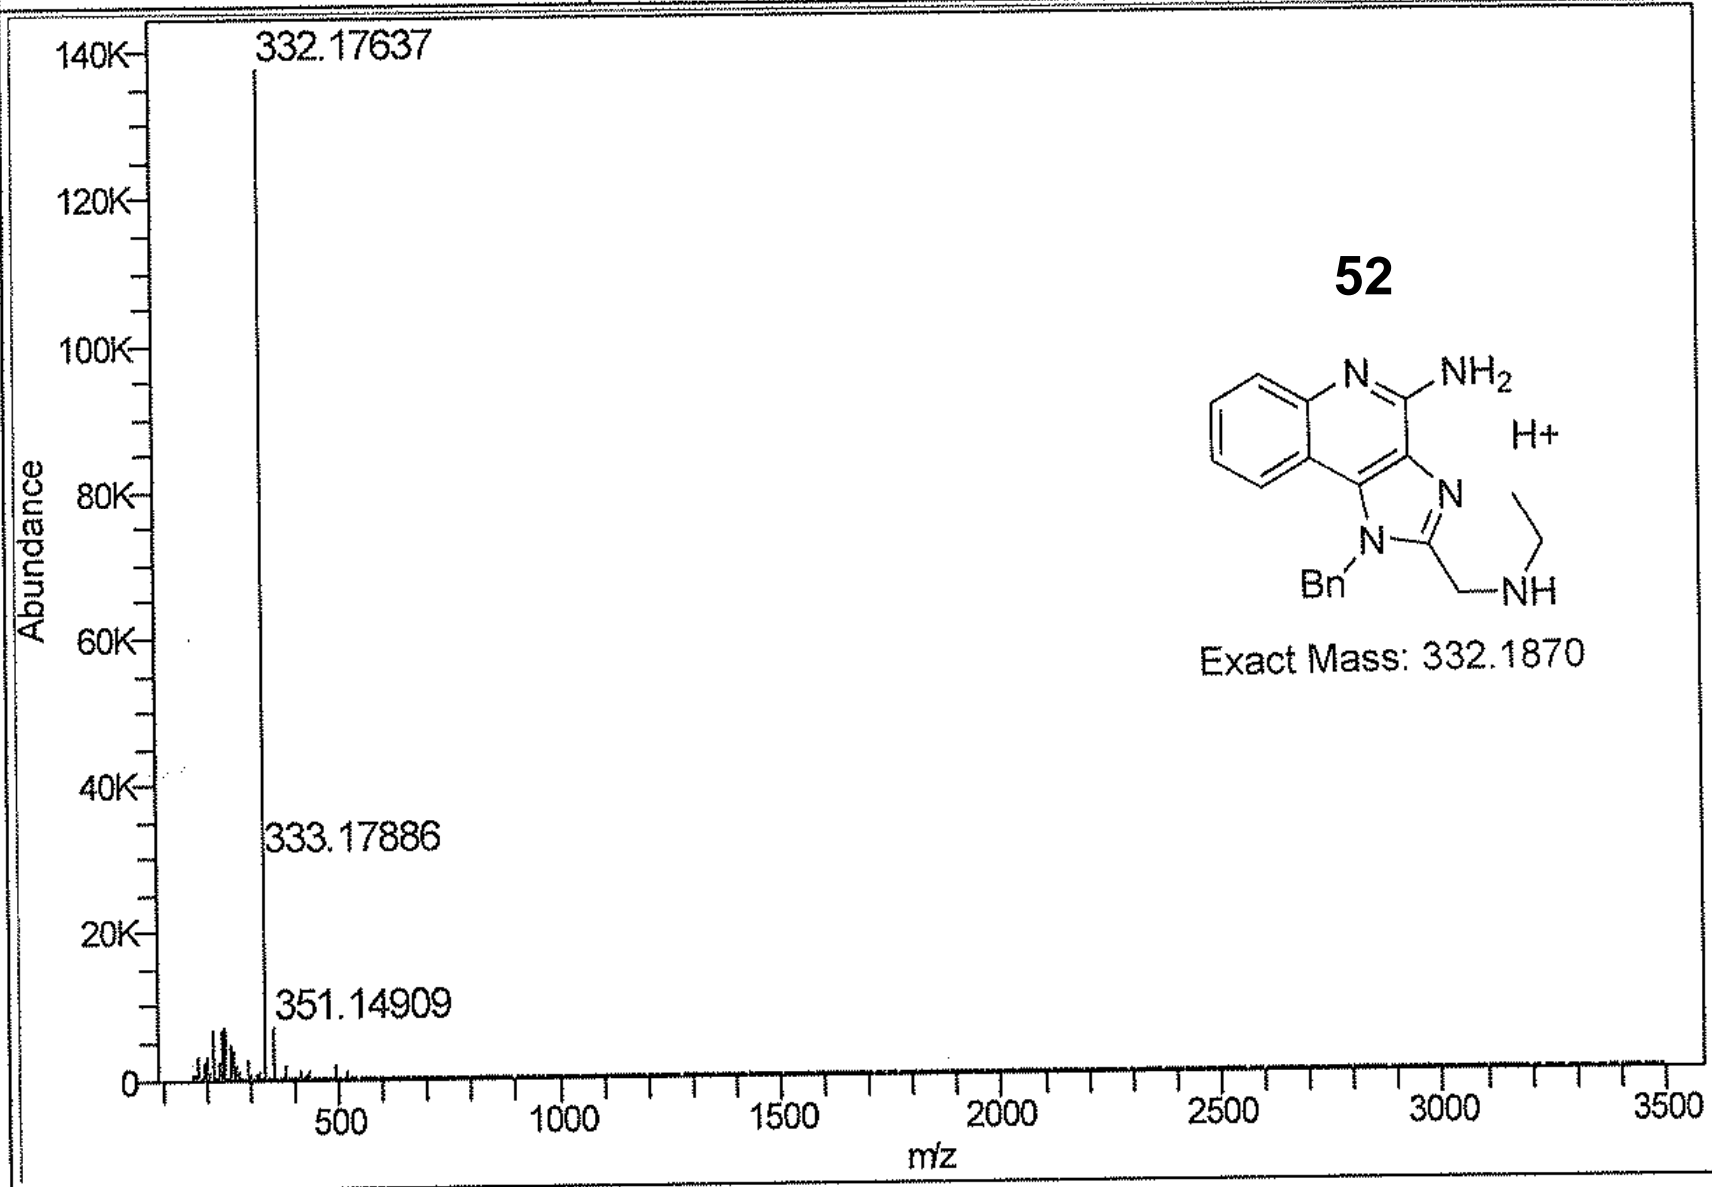

# <sup>1</sup>H Spectrum

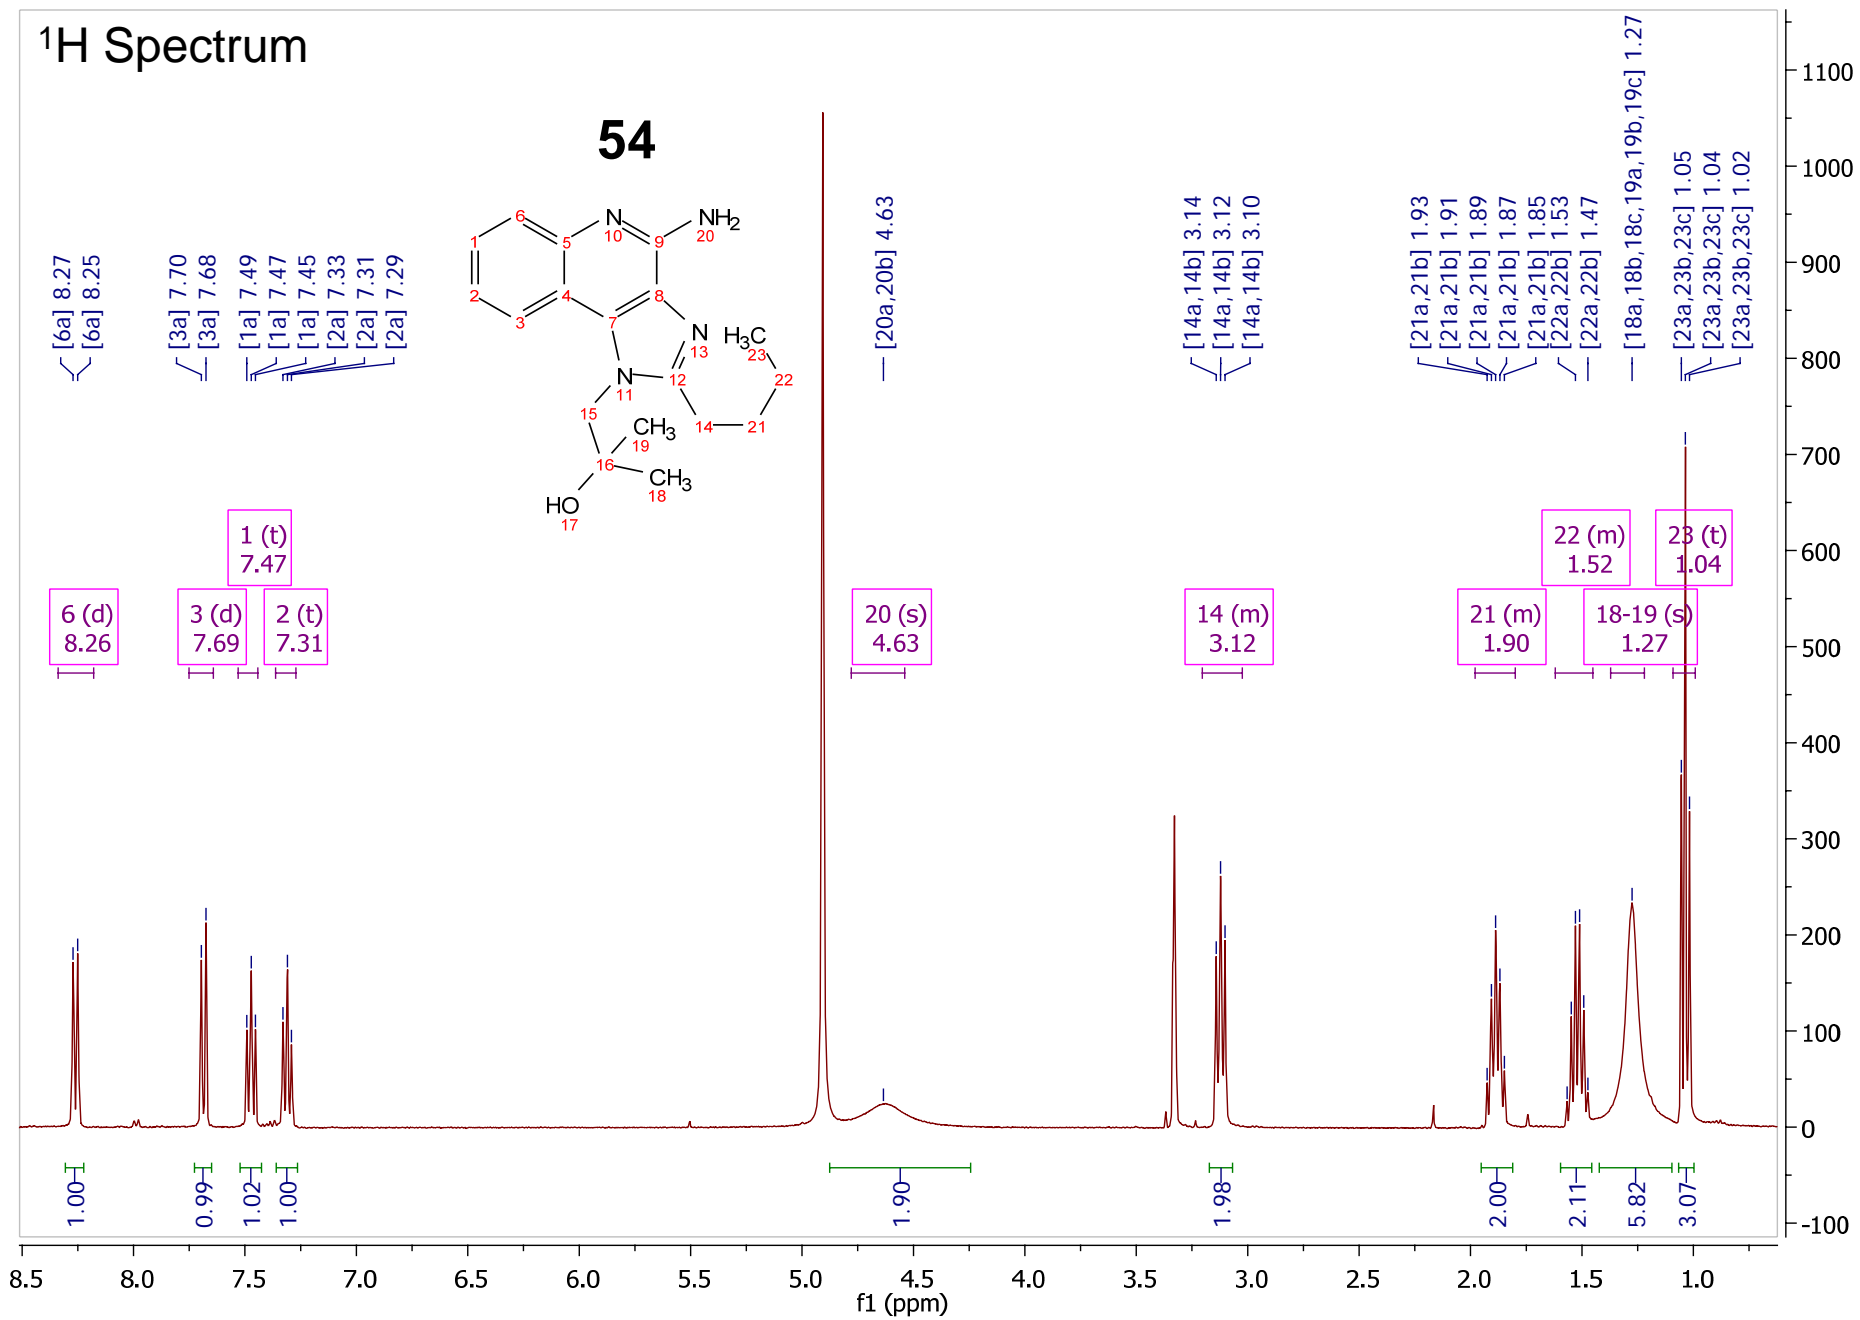

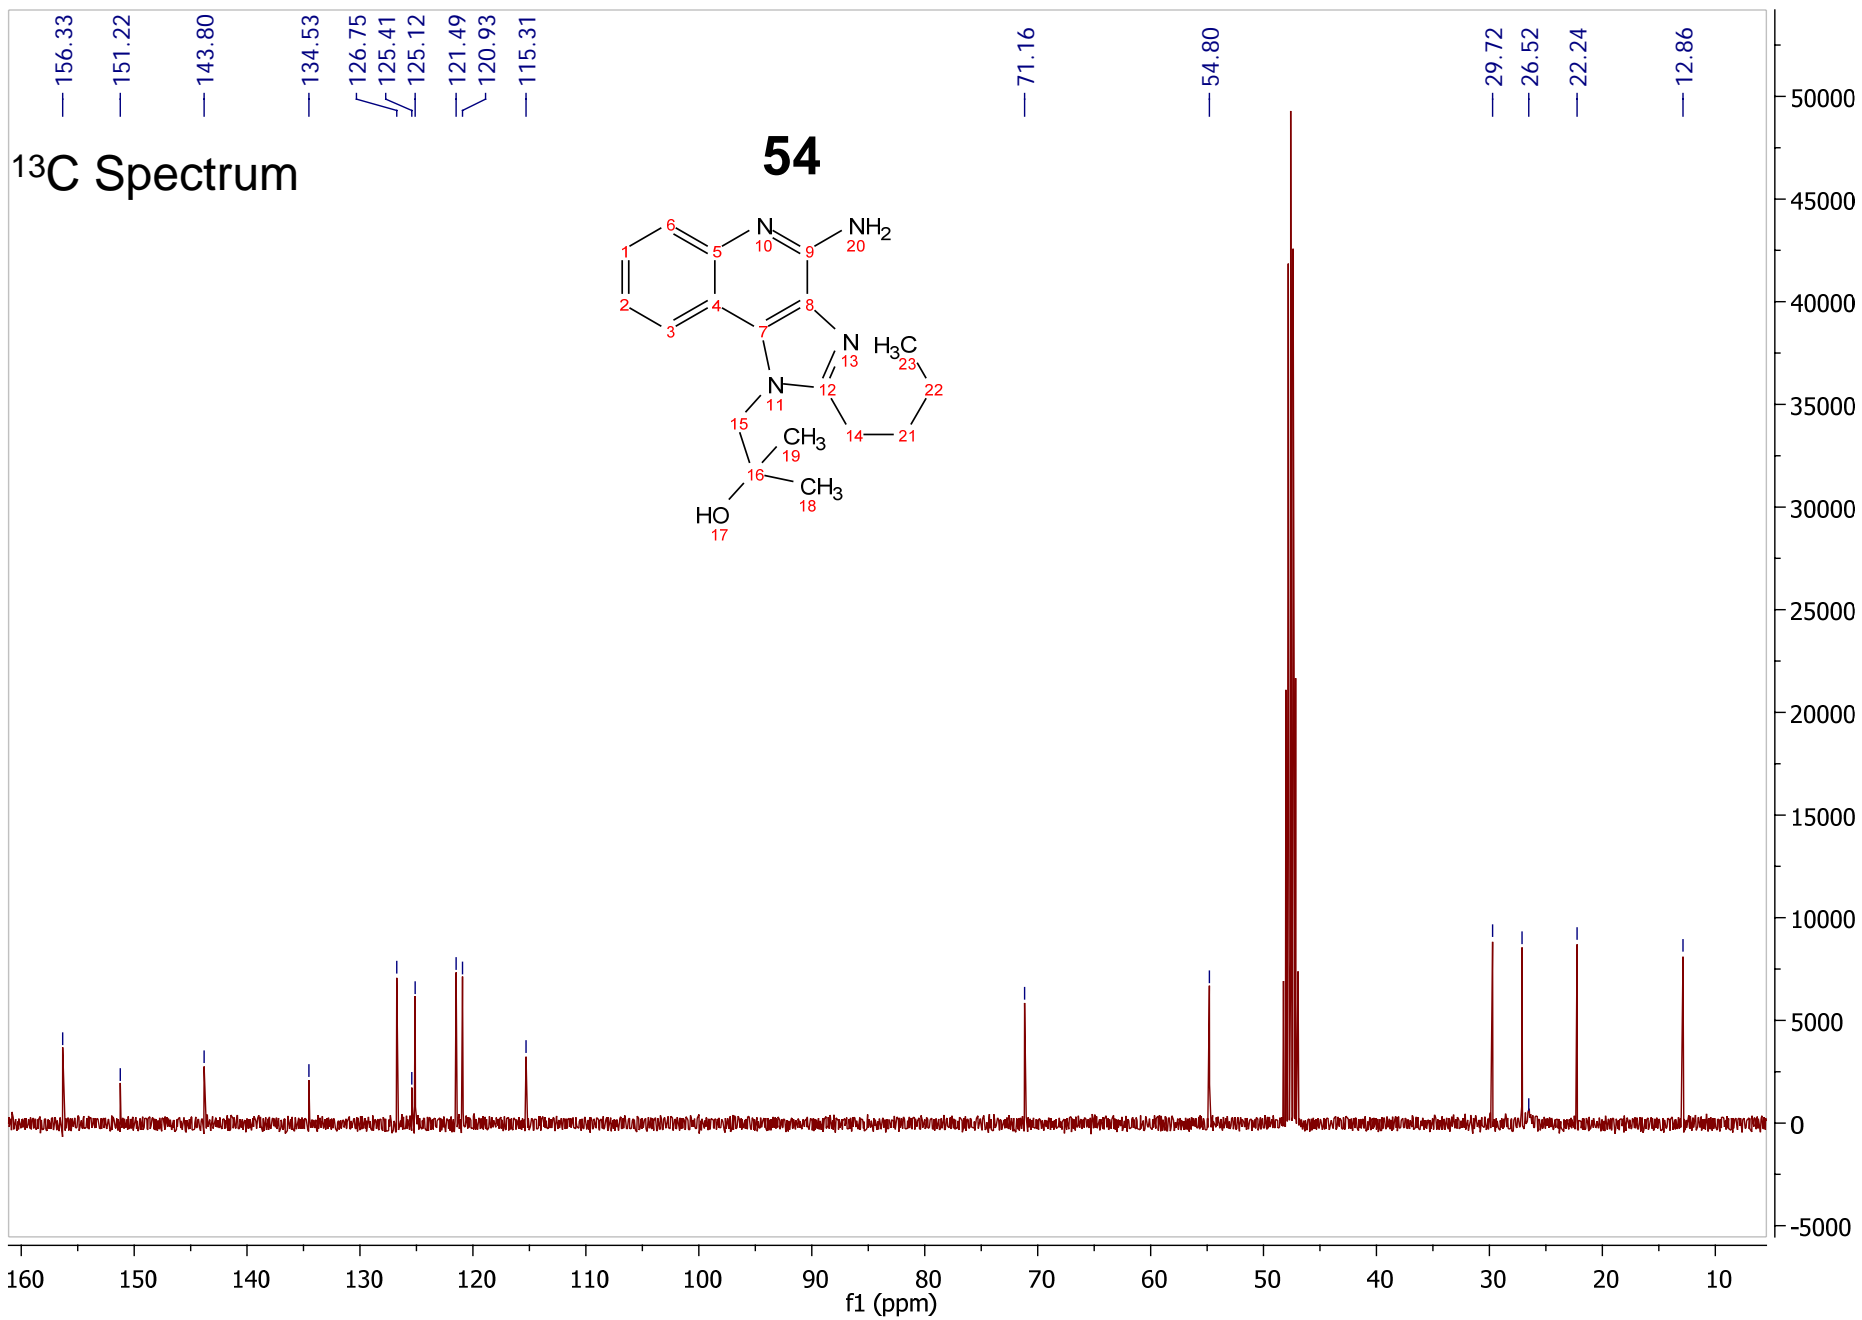

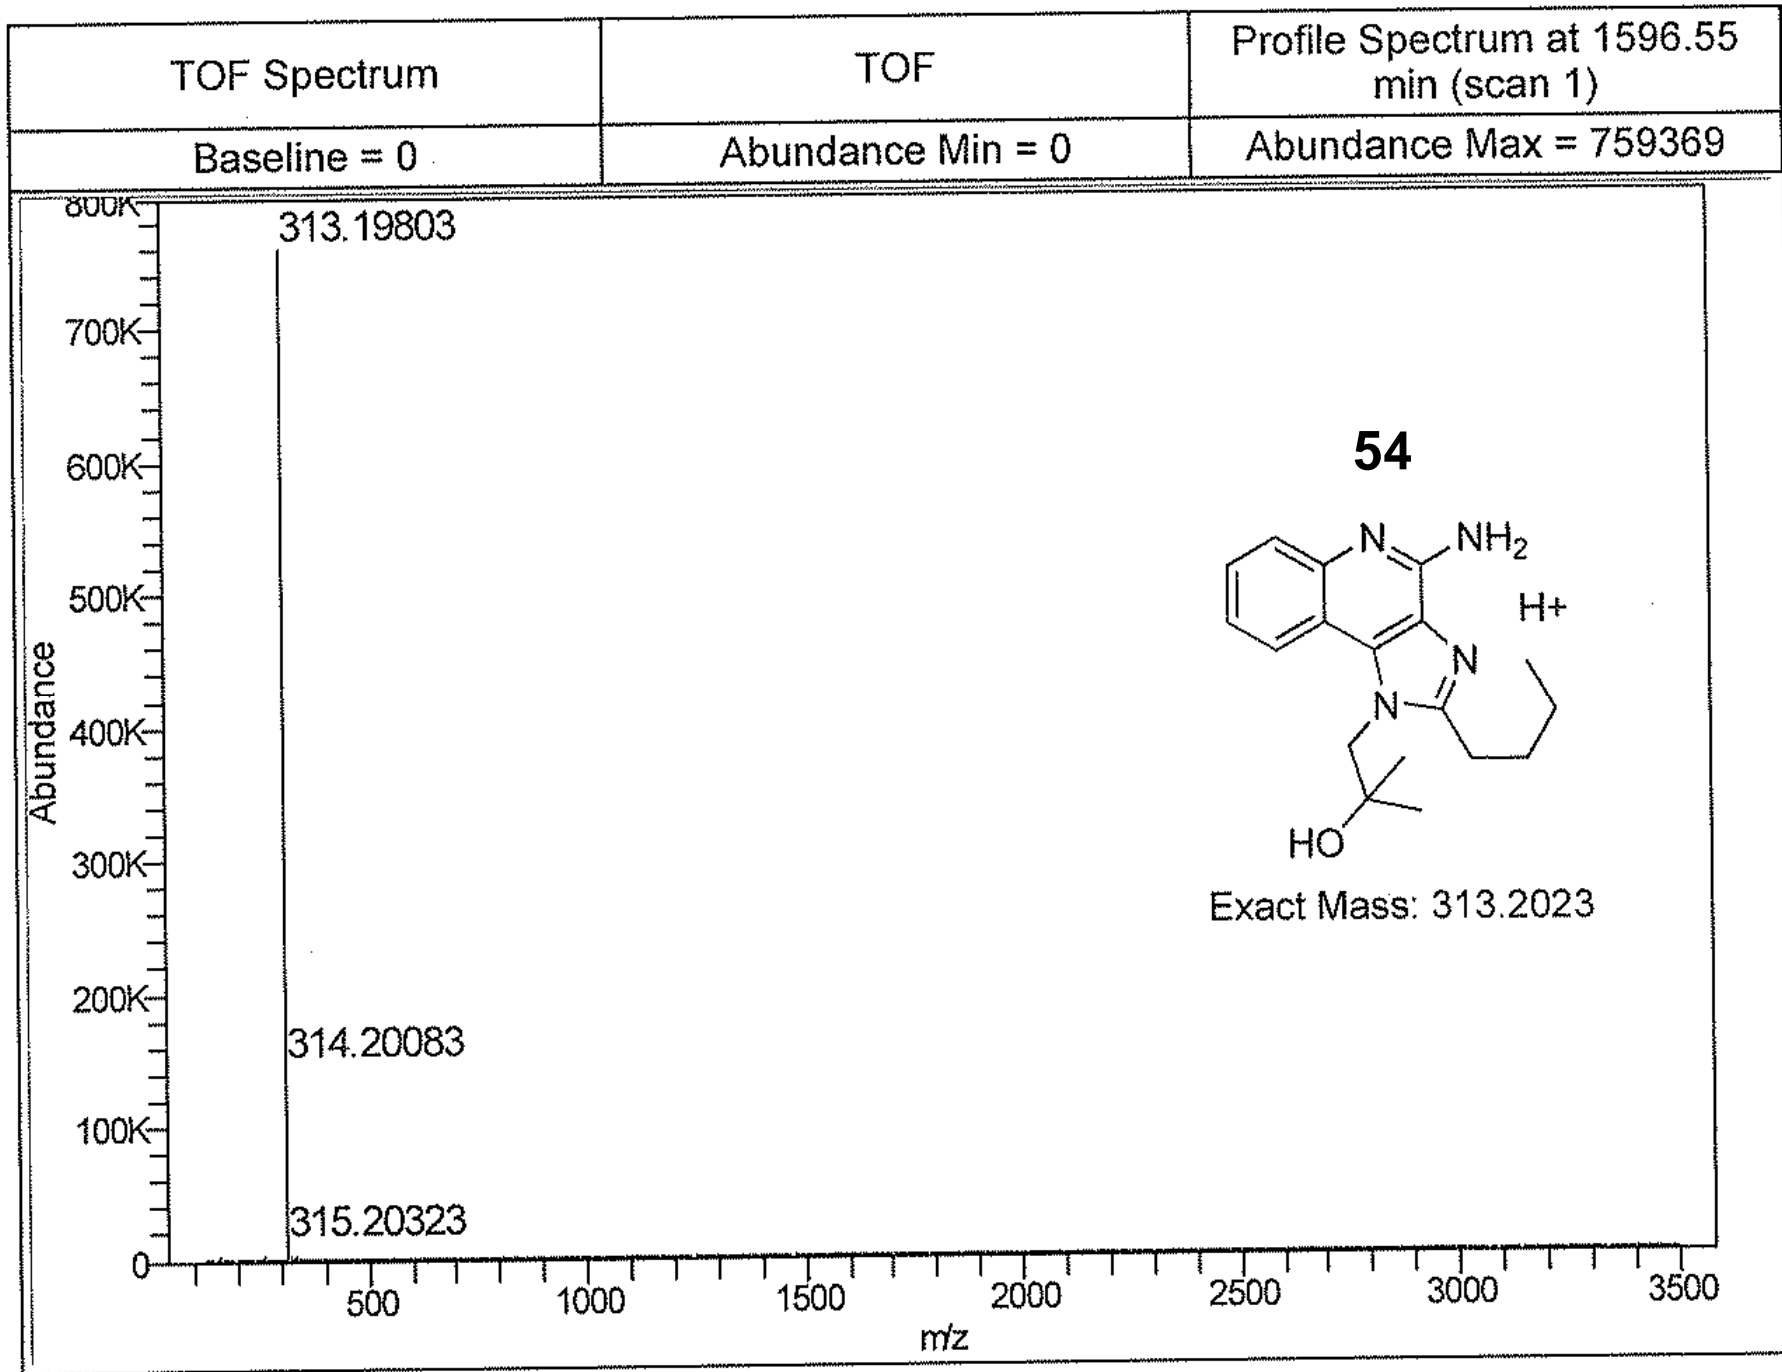

# <sup>1</sup>H Spectrum

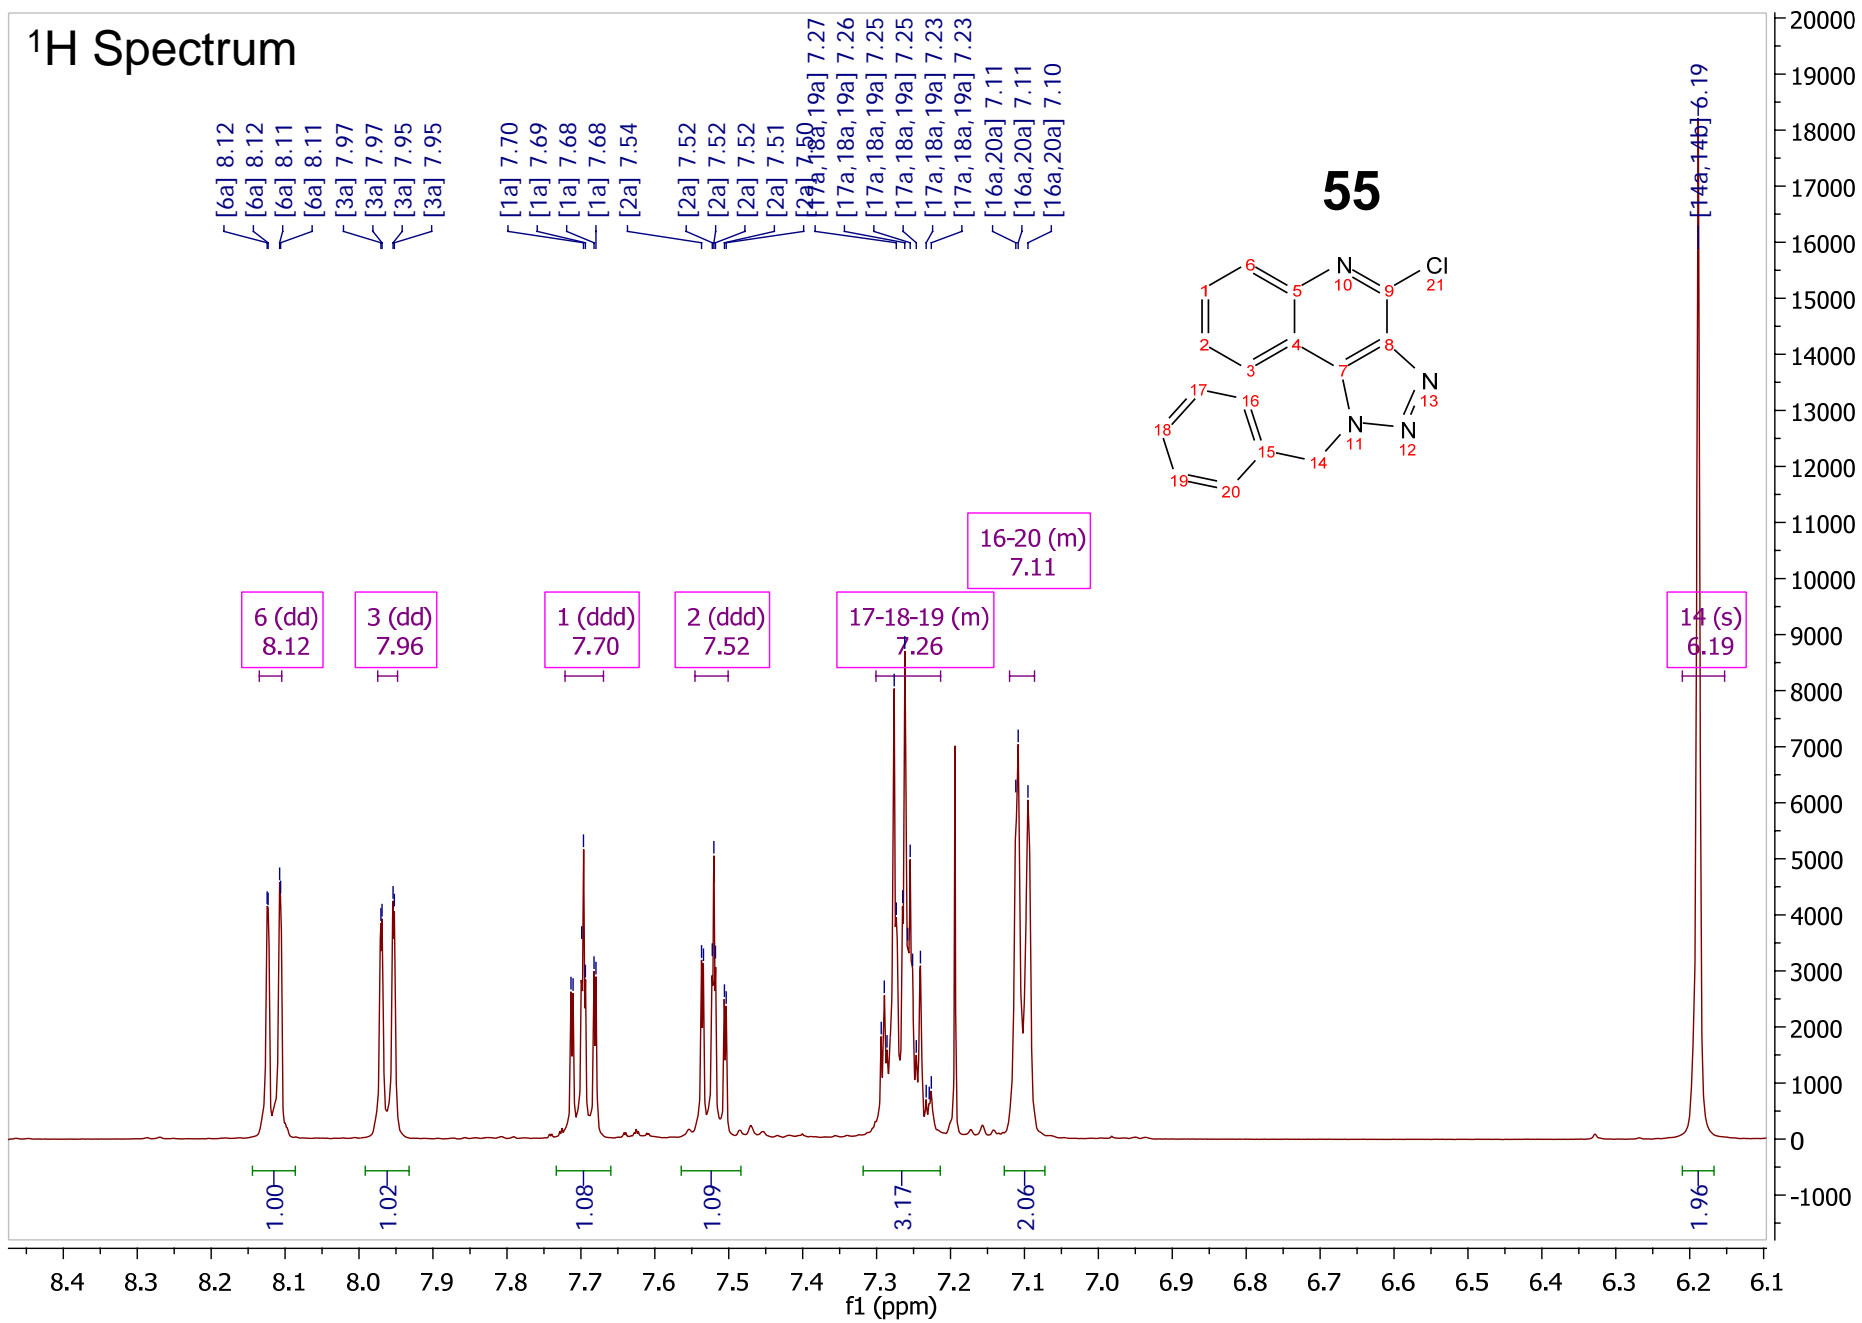

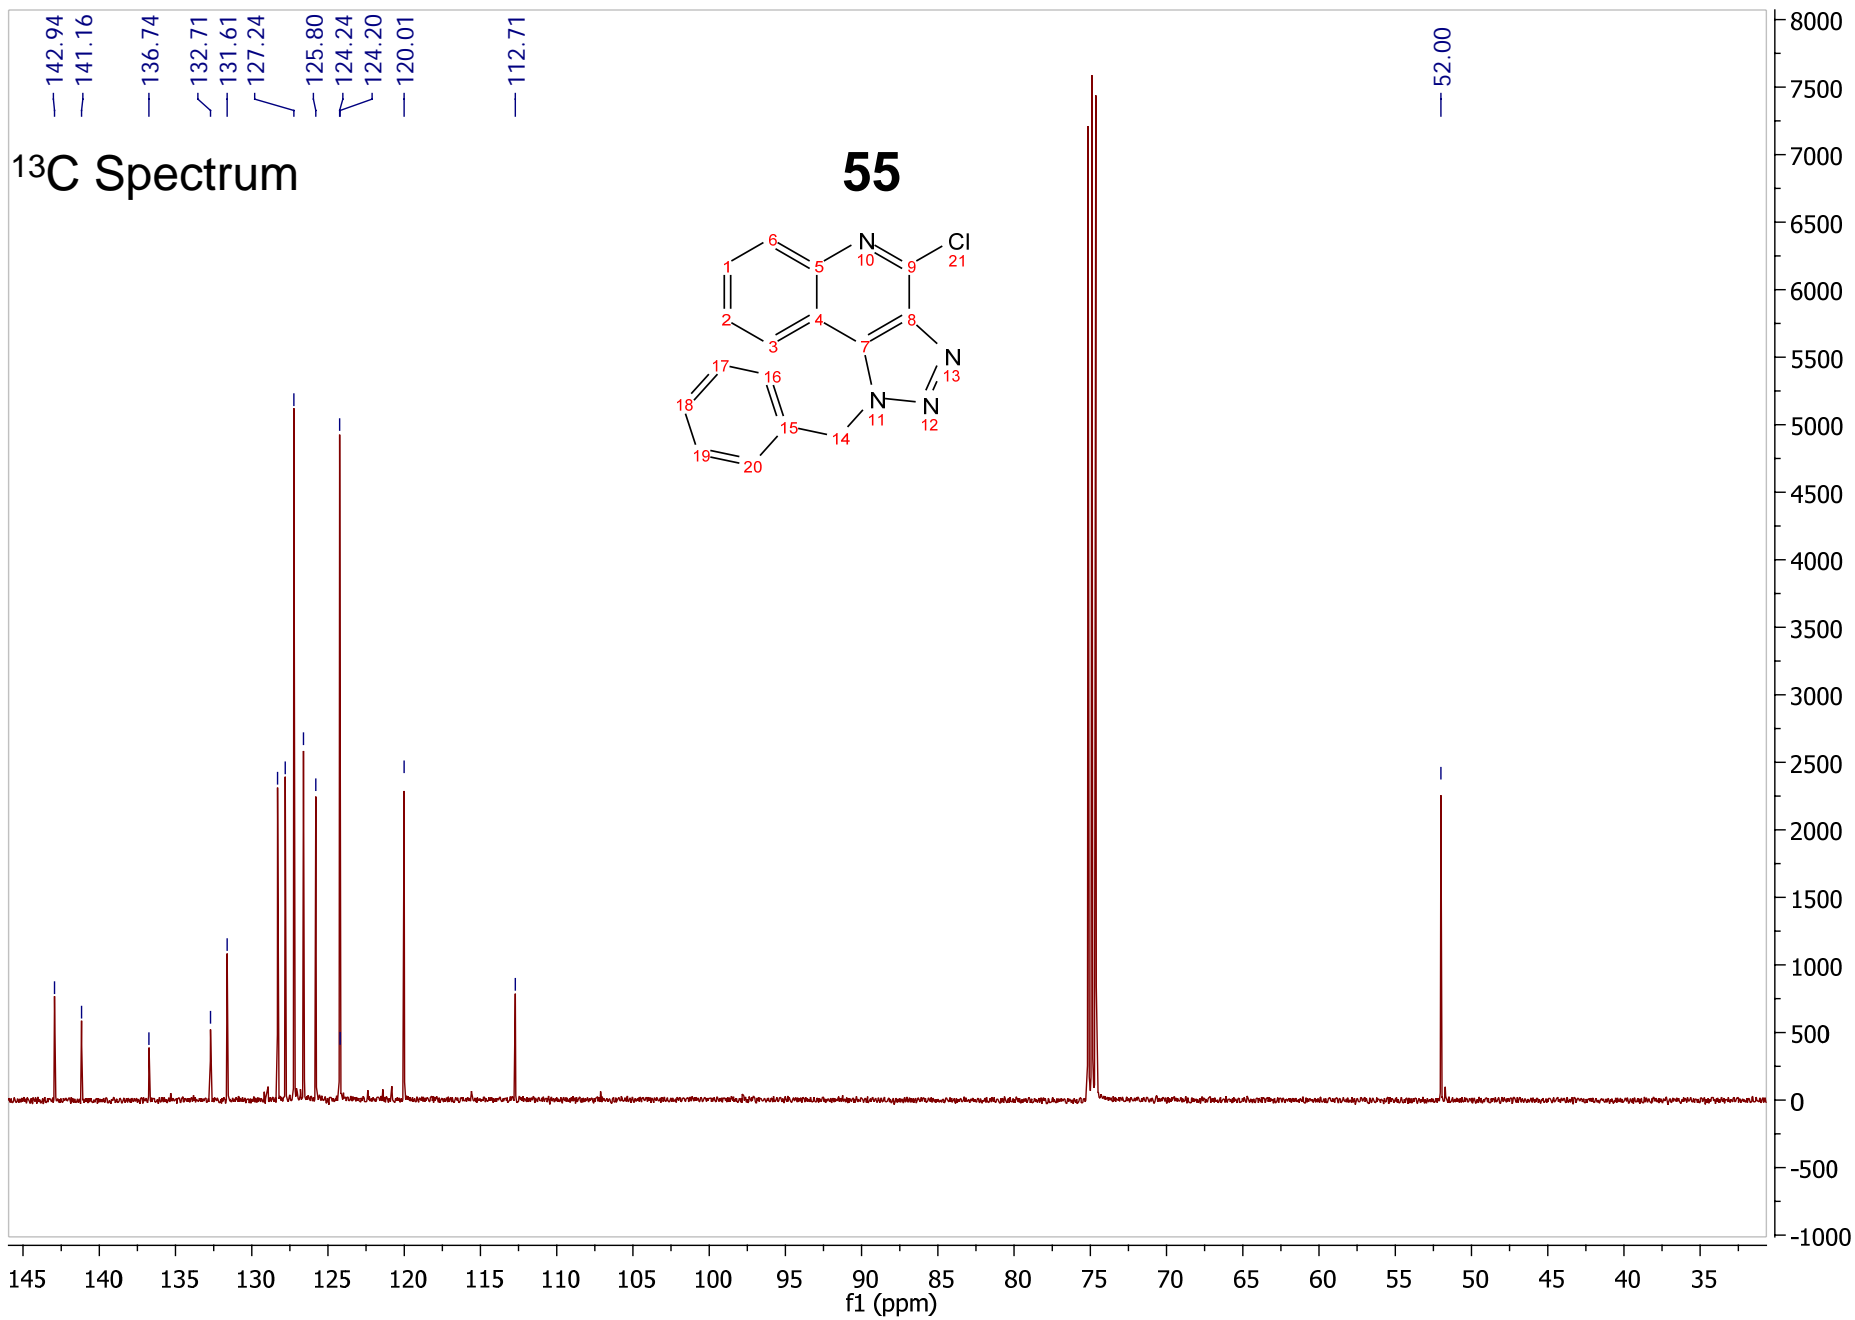

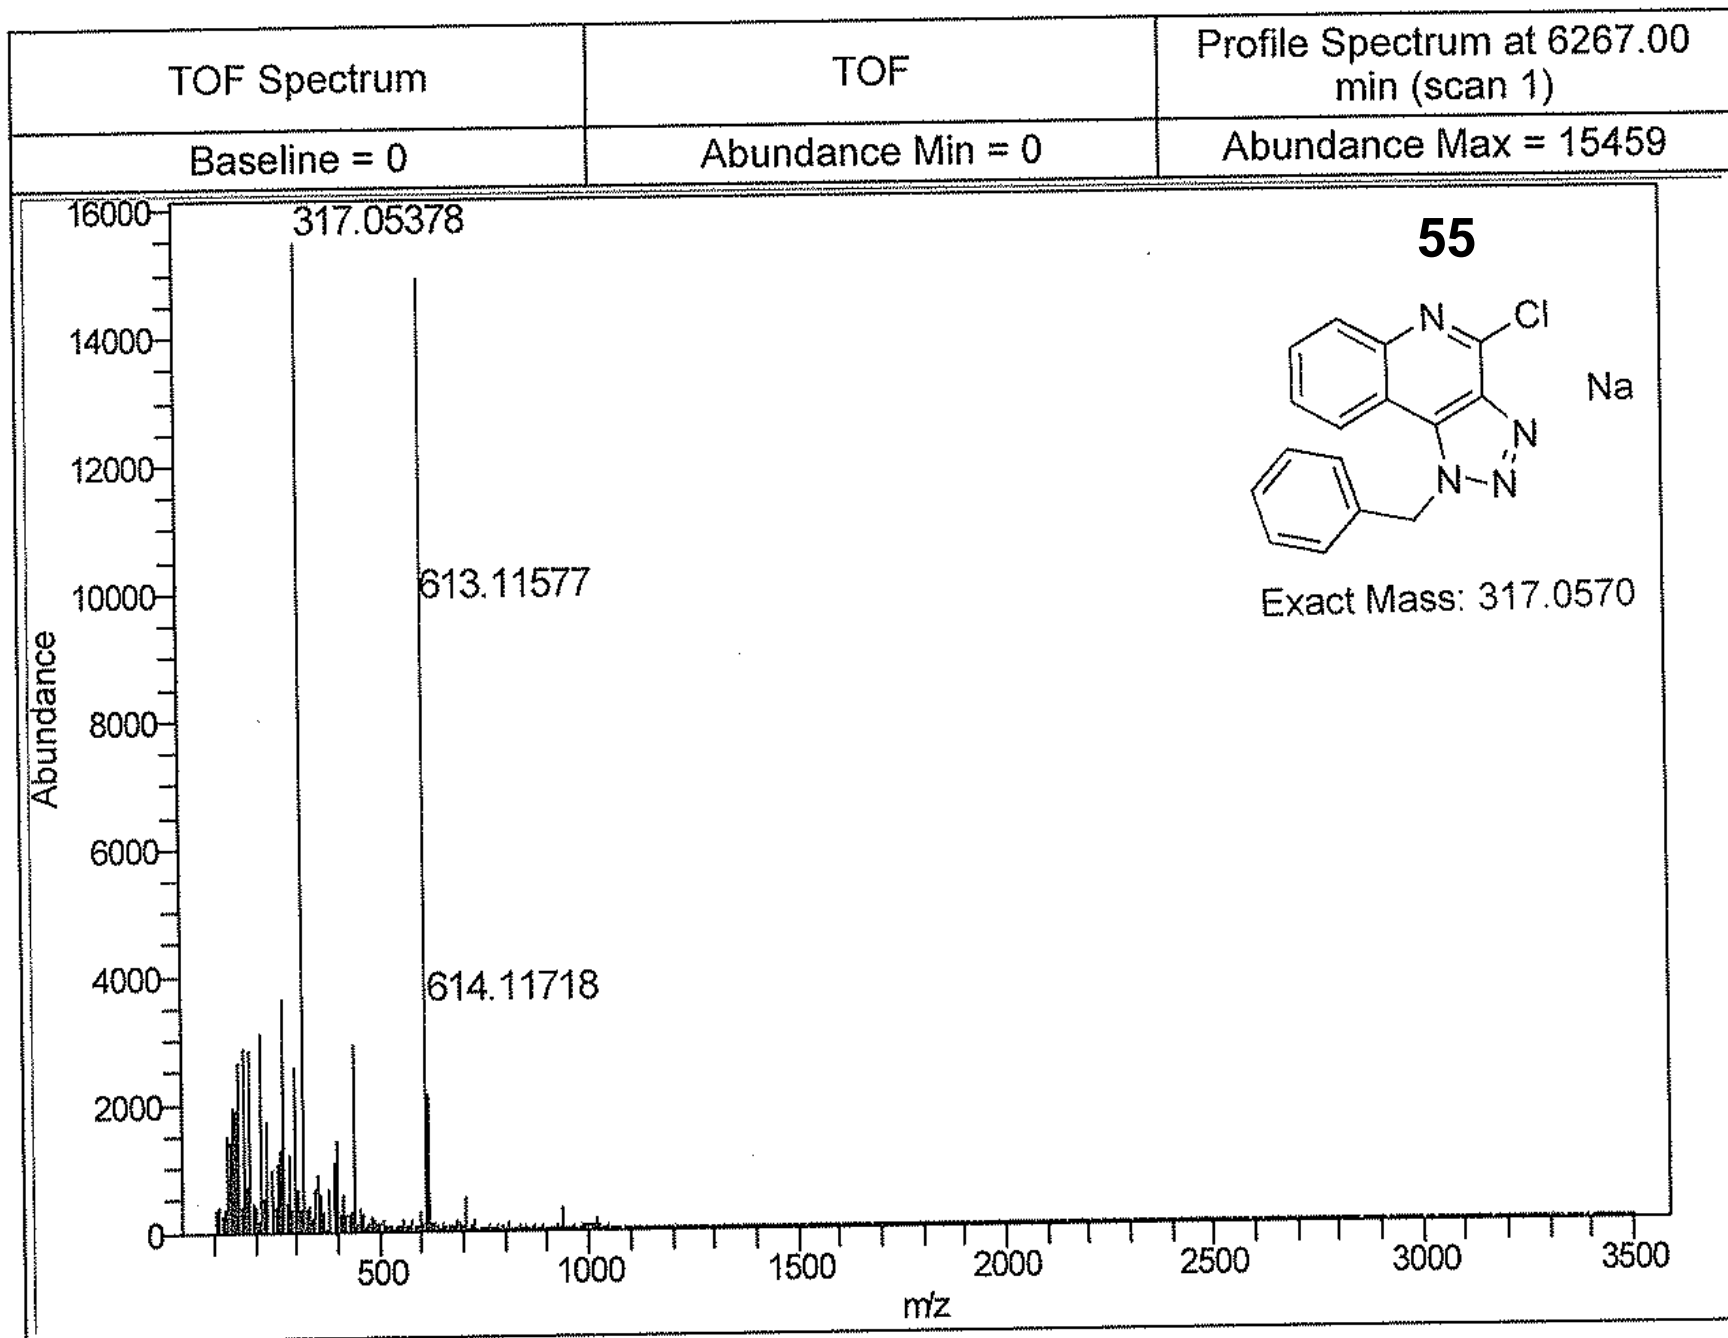

# <sup>1</sup>H Spectrum

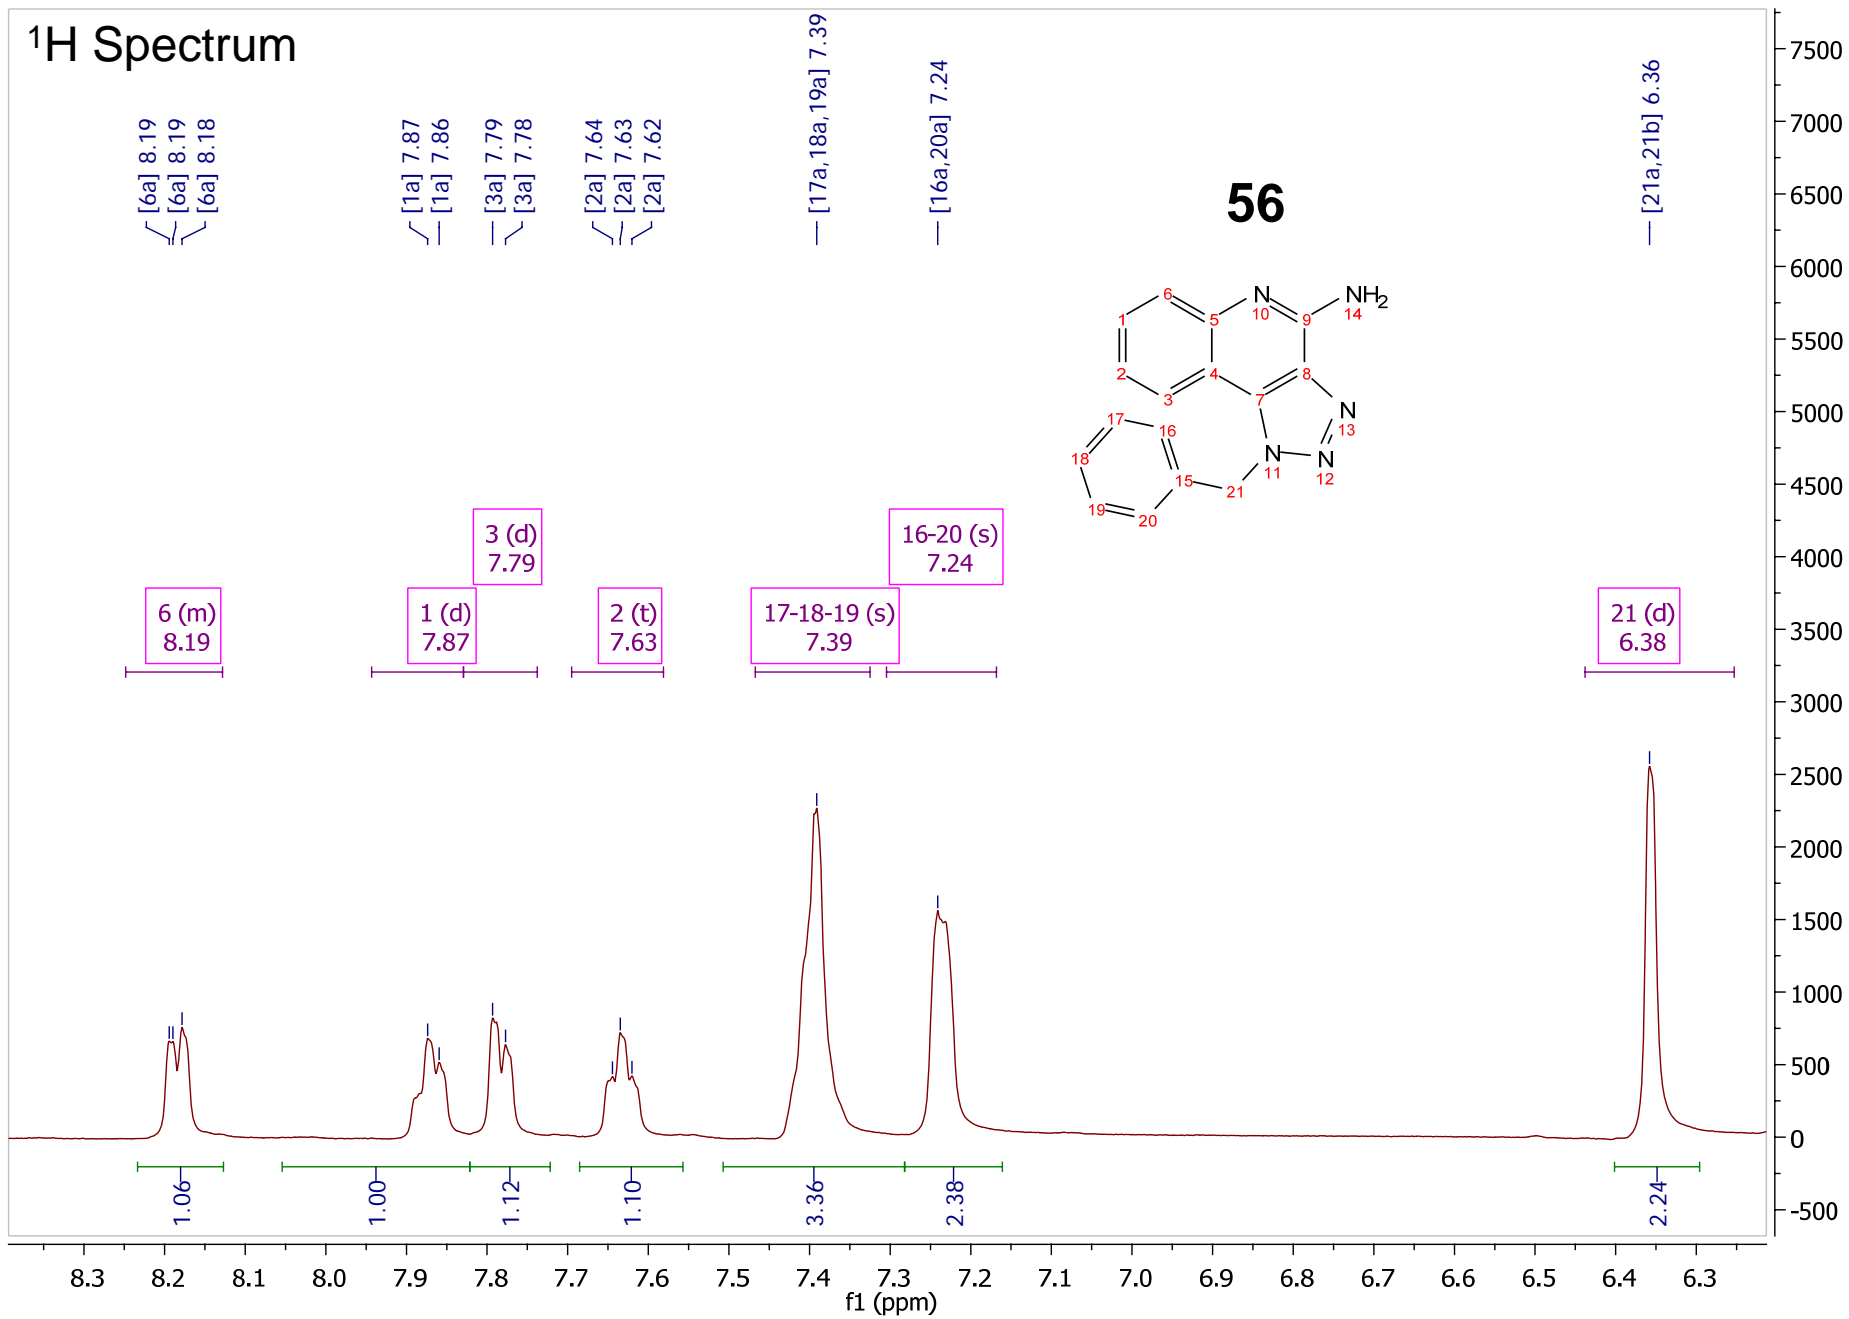



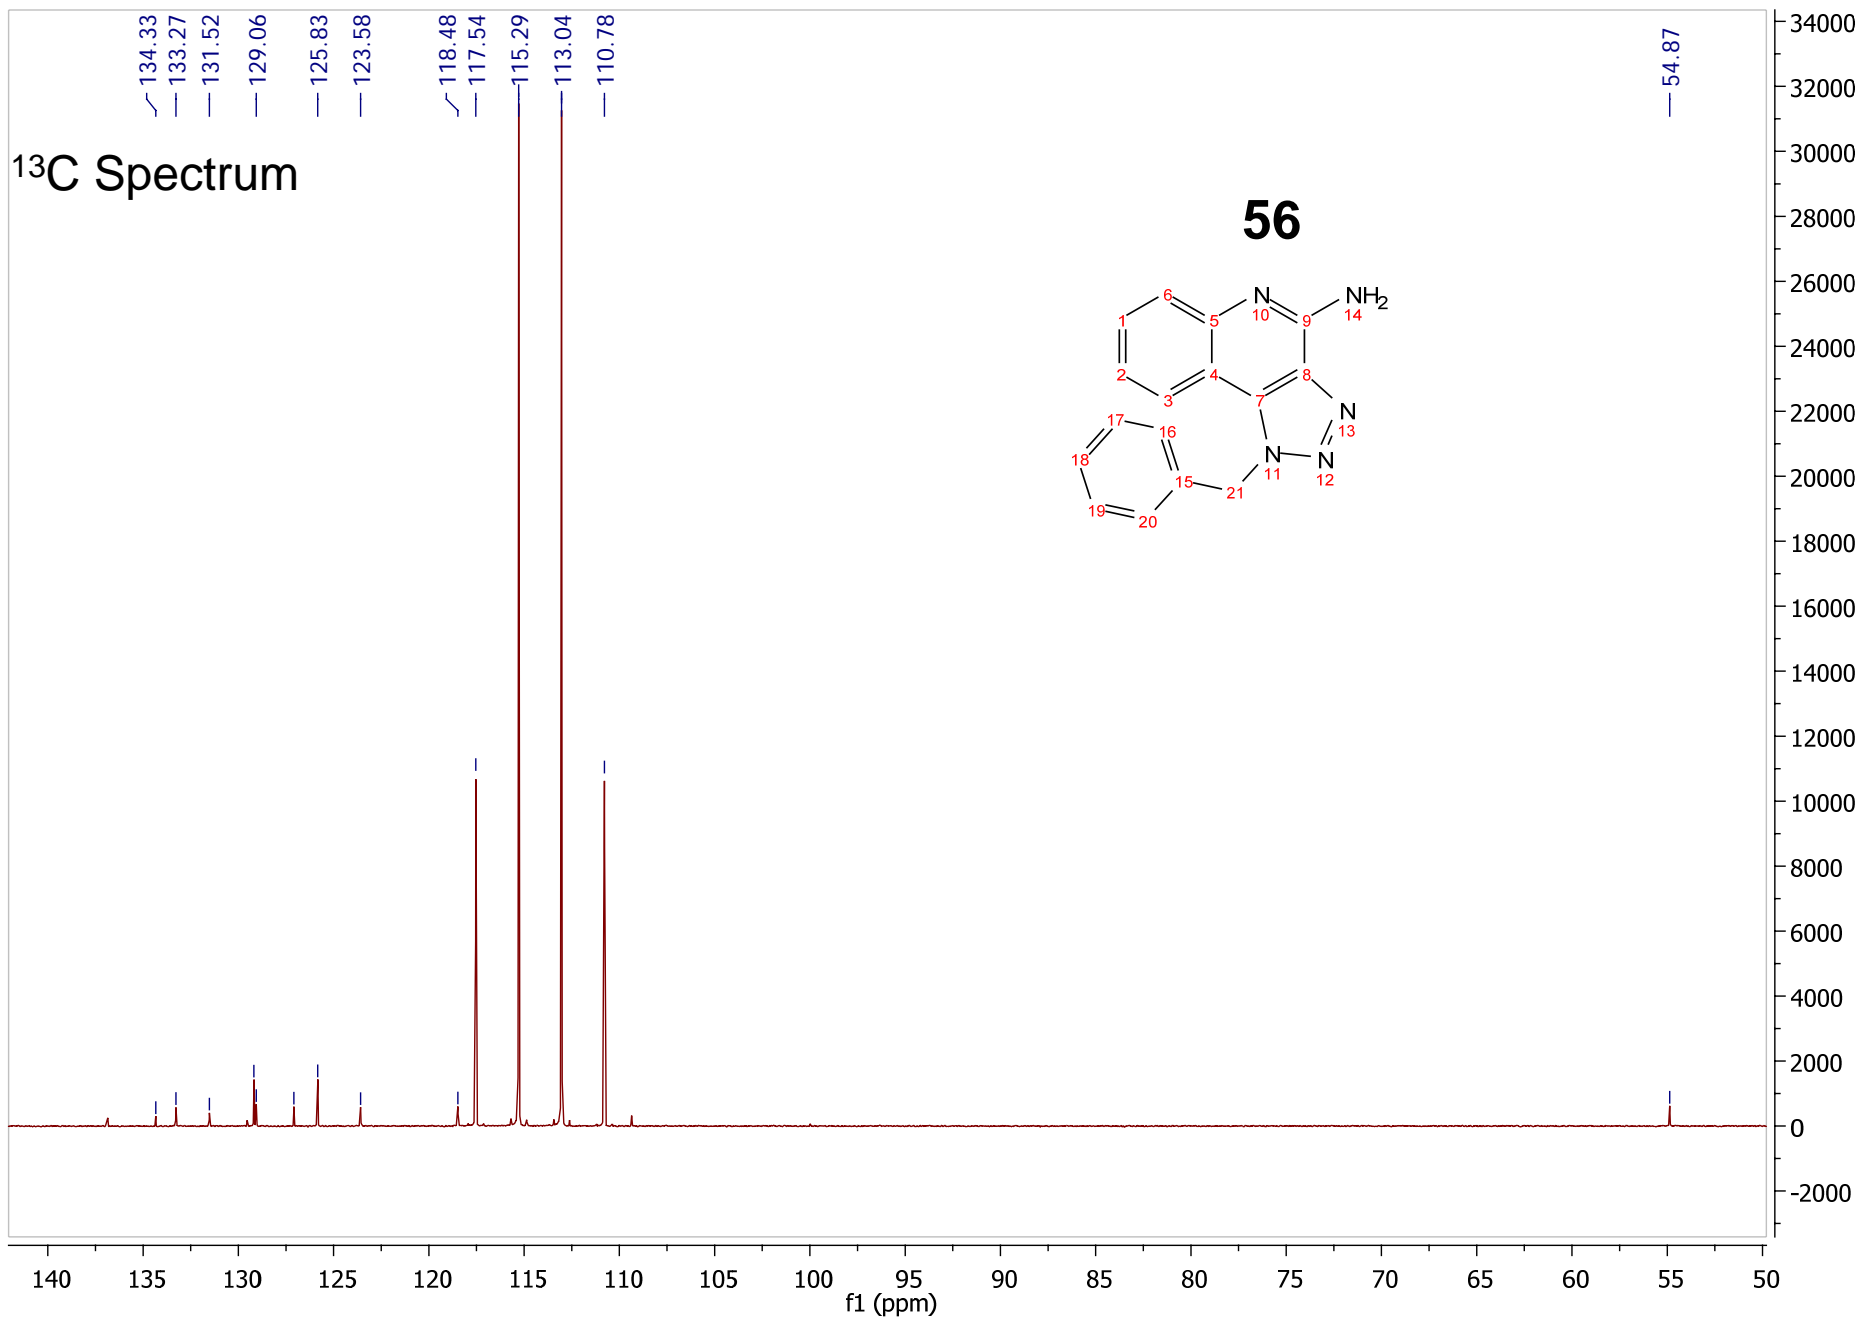

|              |                   |                                          |
|--------------|-------------------|------------------------------------------|
| TOF Spectrum | TOF               | Profile Spectrum at 1141.47 min (scan 1) |
| Baseline = 0 | Abundance Min = 0 | Abundance Max = 339392                   |

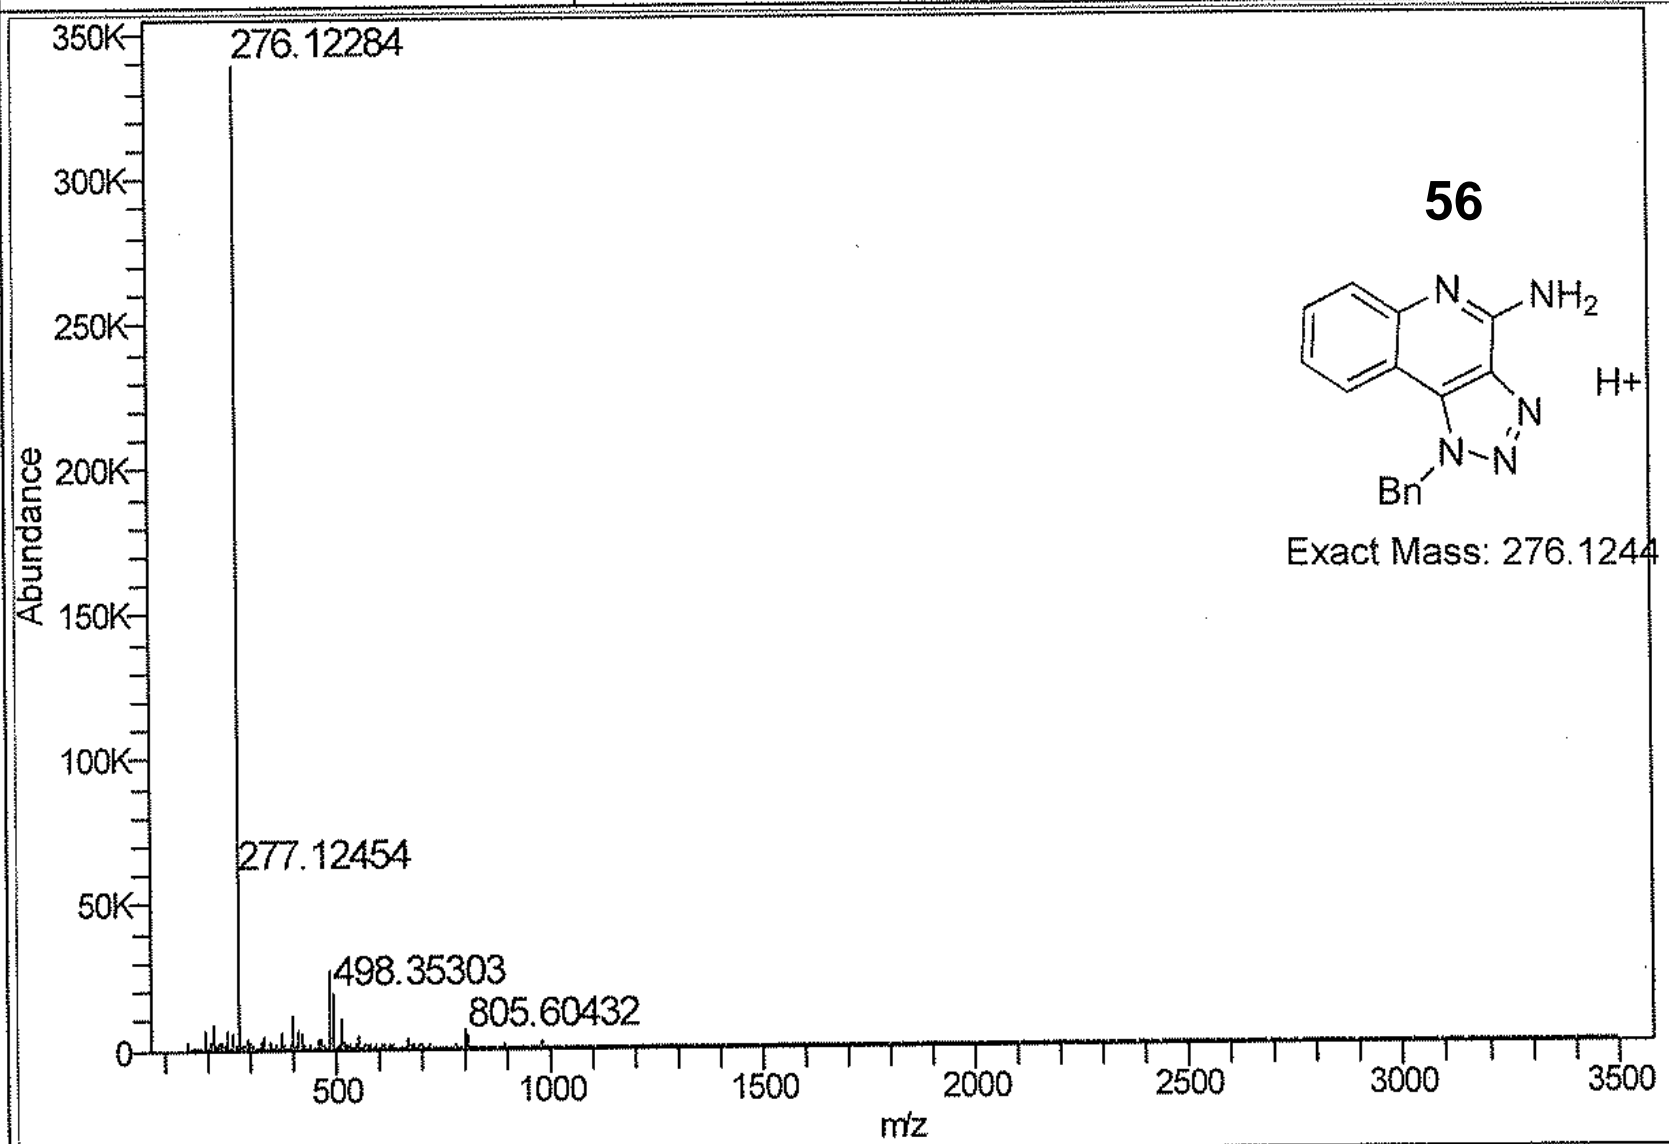

# <sup>1</sup>H Spectrum

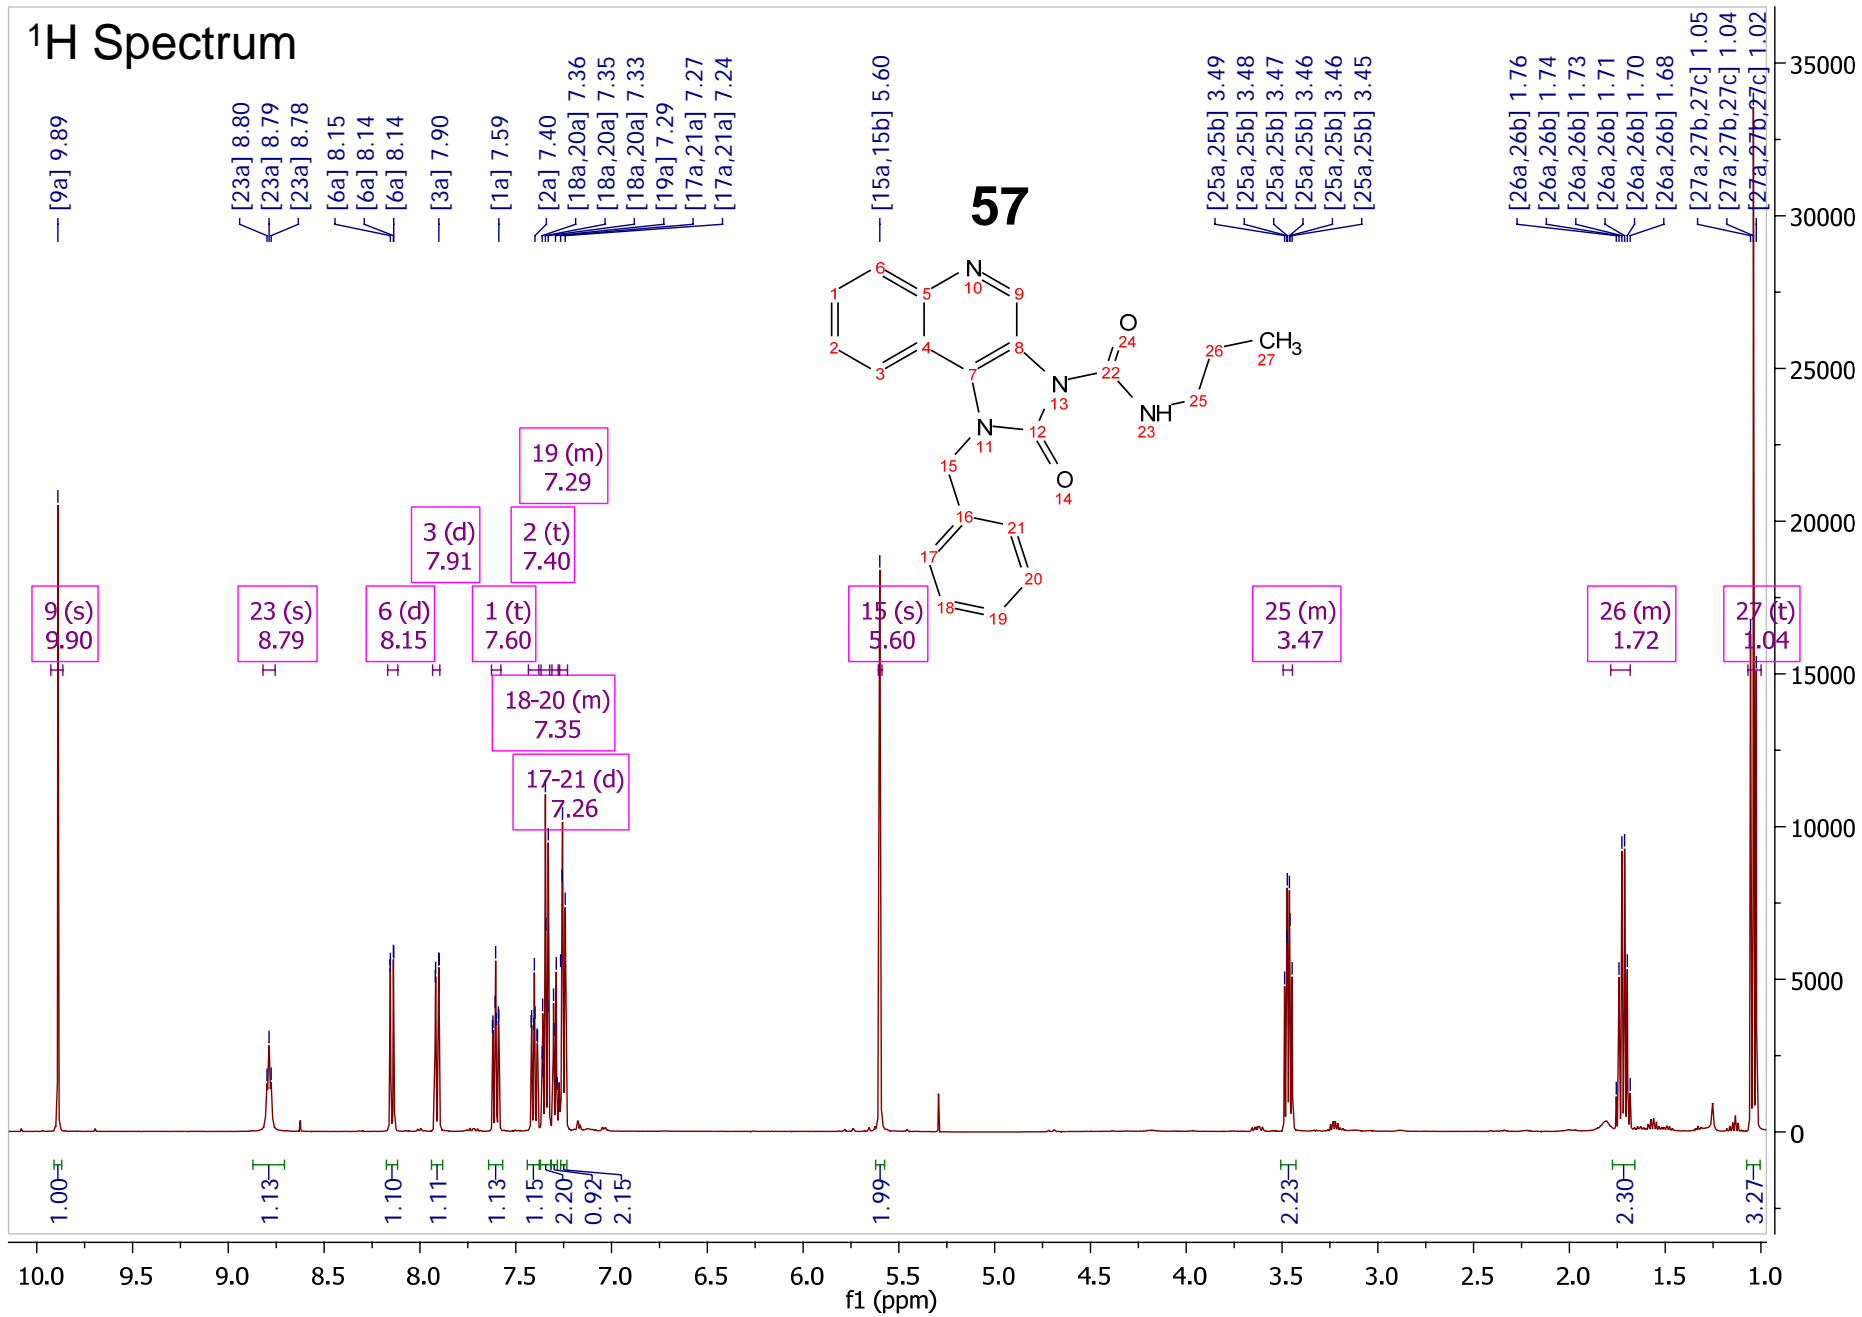

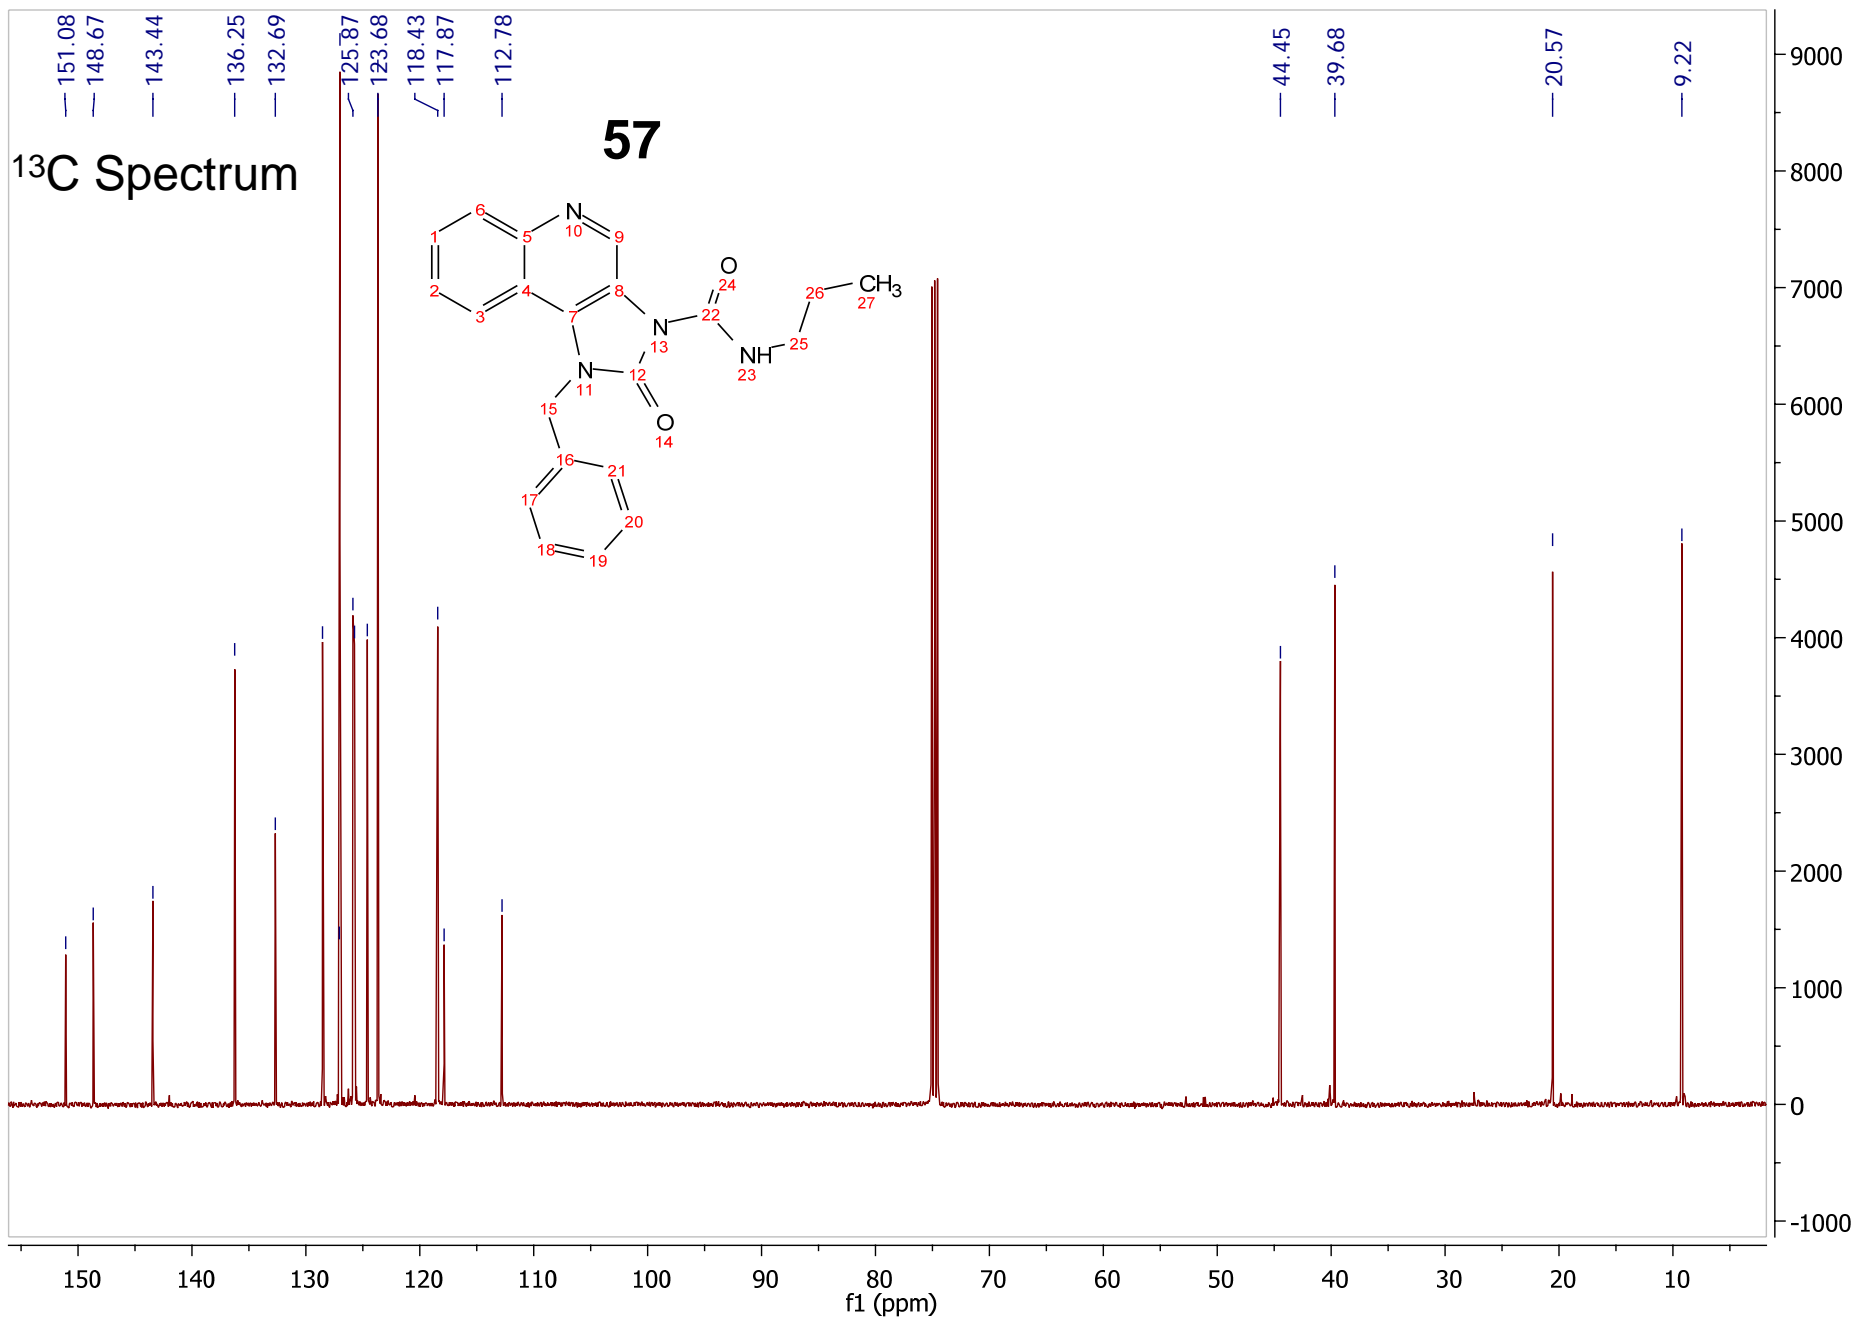

|              |                   |                                          |
|--------------|-------------------|------------------------------------------|
| TOF Spectrum | TOF               | Profile Spectrum at 8610.58 min (scan 1) |
| Baseline = 0 | Abundance Min = 0 | Abundance Max = 1076677                  |

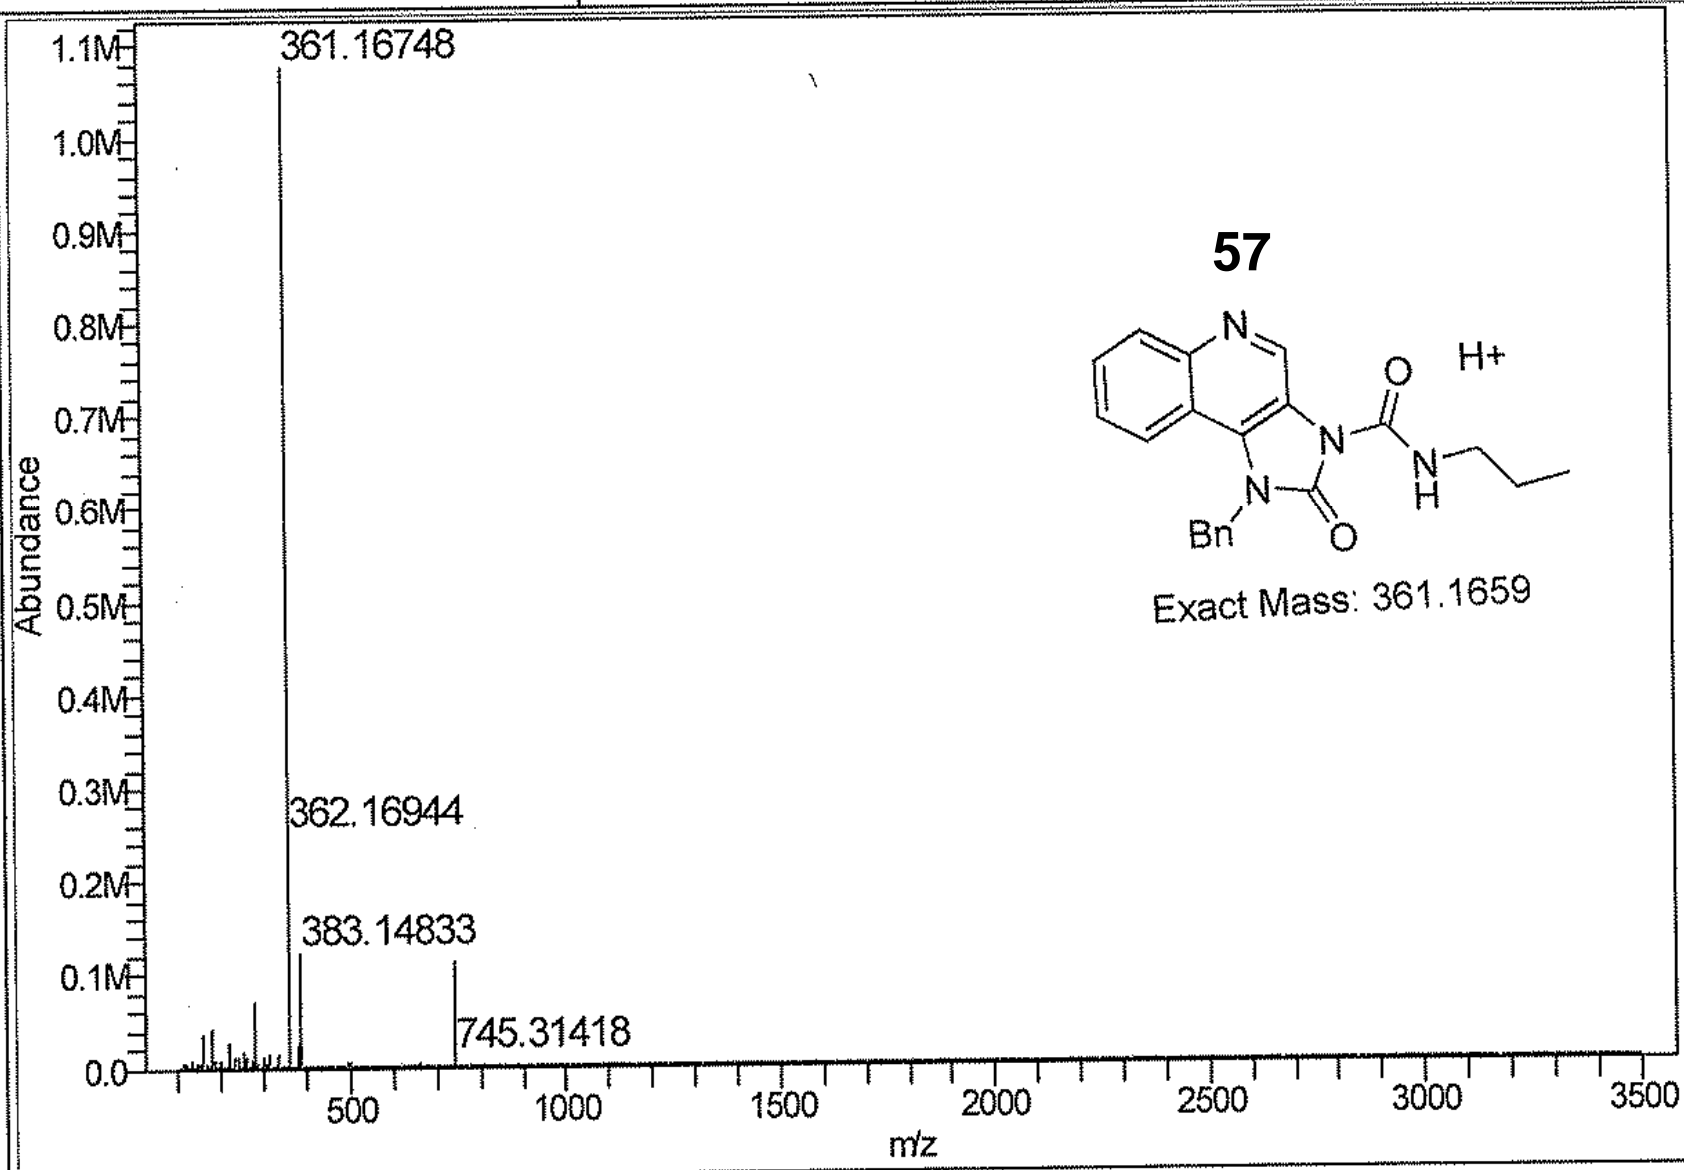

Supplement: NIHMS207375-supplement-1_si_001.pdf [file NIHMS207375-supplement-1_si_001.pdf]
